# Supplementary material for: Targeting Cancer Metabolism Breaks Radioresistance by Impairing the Stress Response
Source: Cancers (Basel). 2021 Jul 27;13(15):3762. doi: 10.3390/cancers13153762 (PMC8345170; doi:10.3390/cancers13153762)
Supplement: Supplementary file 1 [file cancers-13-03762-s001.zip › Supplementary Proteomics Tables S1-5.xlsx]

## Sheet: S1
Table S1. All identified and quantified proteins
Protein FDR Confidence: Combined	Accession	Description	Gene Symbol	Ensembl Gene ID	# PSMs	# Unique Peptides	Abundance Ratio: (LDH) / (Wild)	P-Value: (LDH) / (Wild)	Abundances (Normalized): F6: Sample, LDH	Abundances (Normalized): F7: Sample, LDH	Abundances (Normalized): F8: Sample, LDH	Abundances (Normalized): F9: Sample, LDH	Abundances (Normalized): F1: Sample, Wild	Abundances (Normalized): F2: Sample, Wild	Abundances (Normalized): F3: Sample, Wild	Abundances (Normalized): F4: Sample, Wild	Abundance: F6: Sample, LDH	Abundance: F7: Sample, LDH	Abundance: F8: Sample, LDH	Abundance: F9: Sample, LDH	Abundance: F10: Sample, LDH	Abundance: F1: Sample, Wild	Abundance: F2: Sample, Wild	Abundance: F3: Sample, Wild	Abundance: F4: Sample, Wild	Abundance: F5: Sample, Wild	Abundances Count: F6: Sample, LDH	Abundances Count: F7: Sample, LDH	Abundances Count: F8: Sample, LDH	Abundances Count: F9: Sample, LDH	Abundances Count: F10: Sample, LDH	Abundances Count: F1: Sample, Wild	Abundances Count: F2: Sample, Wild	Abundances Count: F3: Sample, Wild	Abundances Count: F4: Sample, Wild	Abundances Count: F5: Sample, Wild	Found in Sample: [S6] F6: Sample, LDH	Found in Sample: [S7] F7: Sample, LDH	Found in Sample: [S8] F8: Sample, LDH	Found in Sample: [S9] F9: Sample, LDH	Found in Sample: [S10] F10: Sample, LDH	Found in Sample: [S1] F1: Sample, Wild	Found in Sample: [S2] F2: Sample, Wild	Found in Sample: [S3] F3: Sample, Wild	Found in Sample: [S4] F4: Sample, Wild	Found in Sample: [S5] F5: Sample, Wild	Coverage [%]	Sum PEP Score	Score Sequest HT: Sequest HT
High	P07195	L-lactate dehydrogenase B chain OS=Homo sapiens OX=9606 GN=LDHB PE=1 SV=2	LDHB	ENSG00000111716.12	503	16	0.00778575	1.76786e-10	2.94064e+06	2.92797e+06	3.09905e+06	3.09944e+06	3.94875e+08	3.73486e+08	3.8739e+08	3.88347e+08	2.61311e+06	2.41907e+06	2.68476e+06	2.56228e+06	462666	1.61091e+08	2.76805e+08	3.8739e+08	3.37465e+08	2.08439e+08	10	11	11	10	8	25	23	25	25	24	Peak Found	Peak Found	Peak Found	Peak Found	High	High	High	High	High	High	65	184.975	601.47
High	Q01813	ATP-dependent 6-phosphofructokinase, platelet type OS=Homo sapiens OX=9606 GN=PFKP PE=1 SV=2	PFKP	ENSG00000067057.16	42	10	0.0562792	2.31486e-09		135553	217539	261075	3.93429e+06	3.85592e+06	3.85069e+06	3.87479e+06		111993	188458	215829		1.60501e+06	2.85777e+06	3.85069e+06	3.36711e+06	2.29177e+06		2	2	3		8	9	9	8	9	Not Found	Peak Found	Peak Found	Peak Found	Not Found	High	High	High	High	High	22	45.224	17.09
High	P21333	Filamin-A OS=Homo sapiens OX=9606 GN=FLNA PE=1 SV=4	FLNA	ENSG00000196924.14	483	76	0.141006	3.12284e-09	1.56432e+07	1.78101e+07	1.56168e+07	1.55298e+07	1.08242e+08	1.13451e+08	1.07421e+08	1.13959e+08	1.39008e+07	1.47146e+07	1.35291e+07	1.28384e+07	63544.4	4.41579e+07	8.40828e+07	1.07421e+08	9.90275e+07	6.4681e+07	36	39	38	35	2	74	74	74	72	74	High	High	Peak Found	High	Peak Found	High	High	High	High	High	51	444.913	411.44
High	Q2TB90	Hexokinase HKDC1 OS=Homo sapiens OX=9606 GN=HKDC1 PE=1 SV=3	HKDC1	ENSG00000156510.12	23	6	0.0527562	3.44593e-08	47219	137908	197105	126725	2.50363e+06	2.52983e+06	2.51253e+06	2.28286e+06	41959.7	113939	170755	104763		1.02136e+06	1.87495e+06	2.51253e+06	1.98375e+06	1.39841e+06	1	2	2	2		6	6	6	6	6	Peak Found	Peak Found	Peak Found	Peak Found	Not Found	High	High	High	High	High	9	24.943	1.75
High	Q9UJA5	tRNA (adenine(58)-N(1))-methyltransferase non-catalytic subunit TRM6 OS=Homo sapiens OX=9606 GN=TRMT6 PE=1 SV=1	TRMT6	ENSG00000089195.14	9	3	0.556693	3.93255e-08	725062	708937	778795	724026	1.30021e+06	1.30282e+06	1.31839e+06	1.28906e+06	644304	585718	674684	598547		530427	965569	1.31839e+06	1.12016e+06	684038	3	3	3	3		3	3	3	3	3	Peak Found	Peak Found	High	Peak Found	Not Found	High	High	High	High	High	8	9.782	1.96
High	O60218	Aldo-keto reductase family 1 member B10 OS=Homo sapiens OX=9606 GN=AKR1B10 PE=1 SV=2	AKR1B10	ENSG00000198074.9	118	17	0.202938	5.16253e-08	1.06737e+07	1.10105e+07	1.23704e+07	1.13588e+07	5.21538e+07	5.57078e+07	5.45193e+07	5.82917e+07	9.48487e+06	9.09679e+06	1.07167e+07	9.39024e+06	286437	2.12764e+07	4.12872e+07	5.45193e+07	5.06542e+07	3.19387e+07	11	9	10	11	5	16	16	16	16	16	High	High	High	High	Peak Found	High	High	High	High	High	74	78.655	132.29
High	P23141	Liver carboxylesterase 1 OS=Homo sapiens OX=9606 GN=CES1 PE=1 SV=2	CES1	ENSG00000198848.12	54	13	0.202622	1.28391e-07	3.67849e+06	4.36332e+06	3.02124e+06	3.09508e+06	1.67578e+07	1.66719e+07	1.54622e+07	1.69091e+07	3.26878e+06	3.60494e+06	2617351	2.55868e+06	25675.7	6.83643e+06	1.23561e+07	1.54622e+07	1.46936e+07	8.88506e+06	11	11	9	12	1	13	13	13	13	13	Peak Found	High	Peak Found	High	Peak Found	High	High	High	High	High	31	53.086	36.64
High	O15427	Monocarboxylate transporter 4 OS=Homo sapiens OX=9606 GN=SLC16A3 PE=1 SV=1	SLC16A3	ENSG00000141526.16	14	3	0.683019	1.97112e-07	2.65466e+06	2.60943e+06	2.73596e+06	2.75374e+06	3.90912e+06	4.06717e+06	3.9391e+06	3.95324e+06	2.35899e+06	2.15589e+06	2.37021e+06	2.2765e+06	63432.2	1.59474e+06	3.01433e+06	3.9391e+06	3.43528e+06	2.48199e+06	3	3	3	3	1	3	3	3	3	3	High	High	High	Peak Found	Peak Found	High	High	High	High	High	7	12.584	11.44
High	P00338	L-lactate dehydrogenase A chain OS=Homo sapiens OX=9606 GN=LDHA PE=1 SV=2	LDHA	ENSG00000134333.13	549	17	0.00223775	2.75635e-07	698880	1.40306e+06	476823	906183	4.09952e+08	3.42558e+08	3.55703e+08	3.61563e+08	621038	1.1592e+06	413080	749135	192519	1.67242e+08	2.53883e+08	3.55703e+08	3.14191e+08	2.18815e+08	6	9	4	8	5	23	23	23	23	24	Peak Found	Peak Found	Peak Found	Peak Found	Peak Found	High	High	High	High	High	68	182.675	689.3
High	Q04637	Eukaryotic translation initiation factor 4 gamma 1 OS=Homo sapiens OX=9606 GN=EIF4G1 PE=1 SV=4	EIF4G1	ENSG00000114867.20	404	34	0.51224	3.25005e-07	3.28946e+07	3.93779e+07	3.88557e+07	3.75097e+07	7.4997e+07	7.33317e+07	7.40842e+07	7.52089e+07	2.92308e+07	3.25337e+07	3.36613e+07	3.1009e+07	609225	3.05953e+07	5.43489e+07	7.40842e+07	6.53549e+07	4.20395e+07	33	33	34	35	16	36	36	37	37	36	High	High	High	High	Peak Found	High	High	High	High	High	30	219.252	360.43
High	P41252	Isoleucine--tRNA ligase, cytoplasmic OS=Homo sapiens OX=9606 GN=IARS1 PE=1 SV=2	IARS	ENSG00000196305.17	362	36	0.694167	6.07378e-07	5.19328e+07	5.33155e+07	5.52236e+07	5.23996e+07	7.83838e+07	7.69364e+07	7.50146e+07	7.53543e+07	4.61485e+07	4.40489e+07	4.78412e+07	4.33183e+07	1.03933e+06	3.1977e+07	5.70205e+07	7.50146e+07	6.54812e+07	4.50746e+07	35	35	35	35	13	35	35	35	35	36	High	High	High	High	Peak Found	High	High	High	High	High	38	196.259	297.1
High	Q15014	Mortality factor 4-like protein 2 OS=Homo sapiens OX=9606 GN=MORF4L2 PE=1 SV=1	MORF4L2	ENSG00000123562.16	26	5	3.13077	7.74526e-07	5.63008e+06	6.19527e+06	6.29874e+06	5.69828e+06	1.80628e+06	2.15258e+06	1.76247e+06	1.99265e+06	5.003e+06	5.11849e+06	5.45671e+06	4710720	155697	736879	1.59536e+06	1.76247e+06	1.73157e+06	822606	5	5	5	5	3	4	4	4	4	4	High	High	High	High	Peak Found	High	High	High	Peak Found	High	24	27.387	30.32
High	P24752	Acetyl-CoA acetyltransferase, mitochondrial OS=Homo sapiens OX=9606 GN=ACAT1 PE=1 SV=1	ACAT1	ENSG00000075239.13	194	15	1.75175	8.06487e-07	3.55498e+07	3.91644e+07	3.79412e+07	3.79467e+07	2.18369e+07	2.15148e+07	2.18063e+07	2.11657e+07	3.15903e+07	3.23574e+07	3.28691e+07	3.13703e+07	697803	8.90846e+06	1.59455e+07	2.18063e+07	1.83925e+07	1.14835e+07	17	17	17	17	9	17	16	16	16	17	High	High	High	High	Peak Found	High	High	High	High	High	50	94.351	178.79
High	Q9H3U7	SPARC-related modular calcium-binding protein 2 OS=Homo sapiens OX=9606 GN=SMOC2 PE=1 SV=2	SMOC2	ENSG00000112562.18	21	5	20.4013	9.61988e-07	3.02317e+06	3.71559e+06	3.37298e+06	3.67708e+06	87339.4	209833	169293	176277	2.68645e+06	3.06979e+06	2.92207e+06	3.03982e+06		35630.5	155515	169293	153180		5	5	5	5		1	1	1	1		High	High	High	High	Not Found	Peak Found	Peak Found	Peak Found	Peak Found	Not Found	18	26.414	19.91
High	P62873	Guanine nucleotide-binding protein G(I)/G(S)/G(T) subunit beta-1 OS=Homo sapiens OX=9606 GN=GNB1 PE=1 SV=3	GNB1	ENSG00000078369.17	86	6	0.216576	1.02003e-06	1.26654e+06	1.08353e+06	1.38874e+06	1.33993e+06	6.64706e+06	6.04674e+06	5.98816e+06	5.52708e+06	1.12547e+06	895203	1.20309e+06	1.10771e+06	78212.5	2.71169e+06	4.48147e+06	5.98816e+06	4.80291e+06	3.30876e+06	5	4	5	5	2	6	6	6	6	6	High	Peak Found	High	High	Peak Found	High	High	High	High	High	51	73.129	103.43
High	P36952	Serpin B5 OS=Homo sapiens OX=9606 GN=SERPINB5 PE=1 SV=2	SERPINB5	ENSG00000206075.13	46	9	0.13199	1.18711e-06	882105	696470	1.35276e+06	1.23925e+06	7.2907e+06	7.81075e+06	8261346	8.81994e+06	783856	575418	1.17192e+06	1.02448e+06	47867.5	2.97427e+06	5.78884e+06	8261346	7.66433e+06	4.6232e+06	4	3	5	5	1	9	9	9	9	9	High	Peak Found	Peak Found	High	Peak Found	High	High	High	High	High	30	49.477	34.44
High	P08473	Neprilysin OS=Homo sapiens OX=9606 GN=MME PE=1 SV=2	MME	ENSG00000196549.10	2	2	6.63576	1.86641e-06	625529	648815	662240	721598	118623	167272	63742.1	78951.7	555857	536046	573710	596539		48392.6	123972	63742.1	68607.3	166874	2	2	2	2		1	1	1	1	2	High	Peak Found	High	Peak Found	Not Found	Peak Found	Peak Found	Peak Found	Peak Found	Peak Found	3	5.661	0
High	Q9Y617	Phosphoserine aminotransferase OS=Homo sapiens OX=9606 GN=PSAT1 PE=1 SV=2	PSAT1	ENSG00000135069.13	156	13	0.480619	3.49082e-06	1.71513e+07	2.12515e+07	2.16765e+07	1.98704e+07	3.95424e+07	4.29342e+07	4.36834e+07	4.2626e+07	1.5241e+07	1.75578e+07	1.87787e+07	1.64267e+07	1.17736e+06	1.61315e+07	3.18202e+07	4.36834e+07	3.70411e+07	2.40997e+07	12	13	13	12	6	13	13	13	13	14	High	High	High	High	Peak Found	High	High	High	High	High	48	71.617	166.84
High	P01833	Polymeric immunoglobulin receptor OS=Homo sapiens OX=9606 GN=PIGR PE=1 SV=4	PIGR	ENSG00000162896.5	285	30	3.46116	4.06505e-06	8.31469e+07	9.23024e+07	8.20004e+07	9.75236e+07	2.19794e+07	2.46623e+07	2.60286e+07	2.90499e+07	7.3886e+07	7.62595e+07	7.10383e+07	8.0622e+07	691779	8.9666e+06	1.82781e+07	2.60286e+07	2.52437e+07	1.27535e+07	31	30	31	31	14	23	20	27	27	23	High	High	High	High	High	High	High	High	High	High	59	174.888	328.07
High	P61289	Proteasome activator complex subunit 3 OS=Homo sapiens OX=9606 GN=PSME3 PE=1 SV=1	PSME3	ENSG00000131467.10	97	11	0.555995	4.52932e-06	1.61655e+07	1.75206e+07	1.78563e+07	1.53108e+07	3.12319e+07	2.9425e+07	3.11621e+07	2.87246e+07	1.4365e+07	1.44754e+07	1.54693e+07	1.26573e+07	515667	1.27412e+07	2.1808e+07	3.11621e+07	2.49611e+07	1.6945e+07	12	12	12	12	6	13	13	13	13	13	High	High	High	High	Peak Found	High	High	High	High	High	59	74.069	105.92
High	P00403	Cytochrome c oxidase subunit 2 OS=Homo sapiens OX=9606 GN=MT-CO2 PE=1 SV=1	COX2	ENSG00000198712.1	95	4	1.75966	5.09796e-06	2.10185e+07	2.31906e+07	2.2898e+07	2.29563e+07	1.30372e+07	1.43277e+07	1.30213e+07	1.29222e+07	18677496	1.91599e+07	1.98369e+07	1.89778e+07	647880	5.31858e+06	1.06188e+07	1.30213e+07	1.12291e+07	8.57773e+06	5	5	5	5	3	5	5	5	5	4	High	High	High	High	High	High	High	High	High	High	19	18.748	86.95
High	Q96HR9	Receptor expression-enhancing protein 6 OS=Homo sapiens OX=9606 GN=REEP6 PE=1 SV=2	REEP6		28	3	2.84806	6.40137e-06	7.54365e+06	8.37805e+06	8.23538e+06	8.09024e+06	3.95294e+06	2.72493e+06	2.83559e+06	2.8966e+06	6.70344e+06	6.92188e+06	7.13446e+06	6.68814e+06	152027	1.61262e+06	2.01955e+06	2.83559e+06	2.51708e+06	1.63339e+06	3	3	3	3	2	3	3	3	3	3	High	High	High	High	Peak Found	High	High	High	High	High	15	14.182	17.52
High	P07099	Epoxide hydrolase 1 OS=Homo sapiens OX=9606 GN=EPHX1 PE=1 SV=1	EPHX1	ENSG00000143819.12	291	17	0.689043	6.76992e-06	6.49504e+07	7.35786e+07	7.4197e+07	7.04694e+07	1.05679e+08	1.03376e+08	1.02197e+08	1.06207e+08	5.77163e+07	6.07901e+07	6.42782e+07	5.82565e+07	1.79978e+06	4.31122e+07	7.6616e+07	1.02197e+08	9.22914e+07	5.6988e+07	19	19	18	19	14	18	18	18	18	18	High	High	High	High	Peak Found	High	High	High	High	High	51	122.86	340.13
High	P07339	Cathepsin D OS=Homo sapiens OX=9606 GN=CTSD PE=1 SV=1	CTSD	ENSG00000117984.13	113	12	0.687783	6.8743e-06	1.67816e+07	1.65064e+07	1.57062e+07	1.68763e+07	2.46781e+07	2.37209e+07	2.35944e+07	2.56624e+07	1.49124e+07	1.36375e+07	1.36065e+07	1.39515e+07	644183	1.00675e+07	1.75805e+07	2.35944e+07	2.23001e+07	1.55433e+07	12	12	12	13	6	13	14	14	14	14	High	High	High	High	Peak Found	High	High	High	High	High	39	66.649	80.24
High	P11310	Medium-chain specific acyl-CoA dehydrogenase, mitochondrial OS=Homo sapiens OX=9606 GN=ACADM PE=1 SV=1	ACADM	ENSG00000117054.13	131	12	1.70637	7.31927e-06	2.67828e+07	2.88696e+07	2.61848e+07	2.77158e+07	1.56676e+07	1.49402e+07	1.62706e+07	1.74511e+07	2.37997e+07	2.38518e+07	2.26843e+07	2.29124e+07	885044	6.39168e+06	1.10728e+07	1.62706e+07	1.51646e+07	7.22189e+06	13	13	12	13	10	13	13	12	13	13	High	High	High	High	High	High	High	High	High	High	37	76.957	105.38
High	P61457	Pterin-4-alpha-carbinolamine dehydratase OS=Homo sapiens OX=9606 GN=PCBD1 PE=1 SV=2	PCBD1	ENSG00000166228.8	90	5	0.552005	7.57855e-06	1.10485e+07	1.2525e+07	1.20104e+07	1.32272e+07	2.19259e+07	2.06527e+07	2.25219e+07	2.30685e+07	9.81792e+06	1.0348e+07	1.04049e+07	1.09348e+07	14817.5	8.94477e+06	1.53065e+07	2.25219e+07	2.0046e+07	474825	6	6	6	6	1	6	6	6	6	5	High	High	High	High	Peak Found	High	High	High	High	Peak Found	51	27.849	95.24
High	P55011	Solute carrier family 12 member 2 OS=Homo sapiens OX=9606 GN=SLC12A2 PE=1 SV=1	SLC12A2	ENSG00000064651.13	428	28	1.86218	8.1389e-06	9.36392e+07	1.04181e+08	1.01331e+08	1.04562e+08	4.90896e+07	5.61507e+07	5.42099e+07	5.91166e+07	8.32096e+07	8.60736e+07	8.77847e+07	8.64402e+07	2.78995e+06	2.00263e+07	4.16155e+07	5.42099e+07	5.1371e+07	3.57572e+07	29	29	29	29	23	28	29	29	29	29	High	High	High	High	High	High	High	High	High	High	30	187.637	515.03
High	Q71RC2	La-related protein 4 OS=Homo sapiens OX=9606 GN=LARP4 PE=1 SV=3	LARP4	ENSG00000161813.21	10	3	0.761117	9.70202e-06	839613	897083	924249	890883	1.15544e+06	1.19198e+06	1.15715e+06	1.20033e+06	746097	741163	800693	736486		471368	883424	1.15715e+06	1.04306e+06	457869	3	3	3	3		3	3	3	3	2	High	High	High	High	Not Found	High	High	High	High	High	7	9.158	0
High	P20839	Inosine-5'-monophosphate dehydrogenase 1 OS=Homo sapiens OX=9606 GN=IMPDH1 PE=1 SV=2	IMPDH1		71	8	0.553618	1.02859e-05	3.64355e+06	3.87253e+06	3.34293e+06	3.32164e+06	6.89743e+06	6.13811e+06	6.35109e+06	6.26859e+06	3.23773e+06	3.19946e+06	2.89604e+06	2.74597e+06	108565	2.81384e+06	4.54919e+06	6.35109e+06	5.44727e+06	2.80677e+06	8	7	7	8	1	8	7	8	8	7	High	High	High	High	Peak Found	High	High	High	High	High	30	44.232	40.31
High	P48735	Isocitrate dehydrogenase [NADP], mitochondrial OS=Homo sapiens OX=9606 GN=IDH2 PE=1 SV=2	IDH2	ENSG00000182054.9	251	16	1.65013	1.09327e-05	4.5689e+07	5.04295e+07	4.81503e+07	4.4867e+07	2.80772e+07	2.87905e+07	2.98241e+07	2.67188e+07	4.06001e+07	4.16644e+07	4.17135e+07	3.70912e+07	1.09066e+06	1.14542e+07	2.13378e+07	2.98241e+07	2.32181e+07	1.27036e+07	17	17	17	17	11	17	15	17	17	17	High	High	High	High	High	High	High	High	High	High	46	102.565	191.94
High	O60701	UDP-glucose 6-dehydrogenase OS=Homo sapiens OX=9606 GN=UGDH PE=1 SV=1	UGDH	ENSG00000109814.11	669	26	0.677315	1.48065e-05	1.33887e+08	1.56501e+08	1.55767e+08	1.46221e+08	2.24434e+08	2.21428e+08	2.18258e+08	2.31386e+08	1.18974e+08	1.293e+08	1.34944e+08	1.2088e+08	4.10078e+06	9.15589e+07	1.64108e+08	2.18258e+08	2.01069e+08	1.10786e+08	31	33	32	33	22	32	32	32	33	34	High	High	High	High	High	High	High	High	High	High	73	235.775	921.97
High	O14841	5-oxoprolinase OS=Homo sapiens OX=9606 GN=OPLAH PE=1 SV=3	OPLAH	ENSG00000178814.16	43	9	2.37353	1.48807e-05	3.34966e+06	3.47876e+06	3.78297e+06	3.18403e+06	1.69815e+06	1.50917e+06	1.27162e+06	1.36773e+06	2.97658e+06	2.87413e+06	3.27725e+06	2.63221e+06	9313.02	692767	1.11851e+06	1.27162e+06	1.18853e+06	612128	9	9	9	8	1	7	6	7	6	5	High	High	High	High	Peak Found	High	High	High	High	High	12	37.471	20.48
High	P42765	3-ketoacyl-CoA thiolase, mitochondrial OS=Homo sapiens OX=9606 GN=ACAA2 PE=1 SV=2	ACAA2	ENSG00000167315.17	410	19	1.9138	1.59585e-05	1.27129e+08	1.49066e+08	1.45384e+08	1.32968e+08	6.98687e+07	7.32069e+07	7.52738e+07	7.22373e+07	1.1297e+08	1.23157e+08	1.25949e+08	1.09923e+08	3.64846e+06	2.85032e+07	5.42564e+07	7.52738e+07	6.27727e+07	3.19984e+07	27	27	28	28	19	28	27	26	27	28	High	High	High	High	High	High	High	High	High	High	75	195.939	465.52
High	P11388	DNA topoisomerase 2-alpha OS=Homo sapiens OX=9606 GN=TOP2A PE=1 SV=3	TOP2A	ENSG00000131747.14	42	4	0.550867	1.7779e-05	667417	812100	752883	676058	1.38544e+06	1.23987e+06	1.26812e+06	1.32587e+06	593080	670951	652236	558892	16639.6	565196	918918	1.26812e+06	1.15215e+06	803521	3	3	3	3	1	3	4	4	4	4	High	High	High	High	Peak Found	High	High	Peak Found	High	High	7	30.336	5.28
High	P62829	60S ribosomal protein L23 OS=Homo sapiens OX=9606 GN=RPL23 PE=1 SV=1	RPL23	ENSG00000125691.12	252	6	0.823123	1.96446e-05	5.34862e+07	5.50375e+07	5.4918e+07	5.40937e+07	6.39412e+07	6.76854e+07	65129628	6.73071e+07	4.75289e+07	4.54716e+07	4.75764e+07	44718813	1.44846e+06	2.60851e+07	5.01643e+07	65129628	5.84884e+07	2.28474e+07	7	7	7	7	6	7	7	7	7	7	High	High	High	High	High	High	High	High	High	High	56	53.845	239.95
High	Q92506	Estradiol 17-beta-dehydrogenase 8 OS=Homo sapiens OX=9606 GN=HSD17B8 PE=1 SV=2	HSD17B8	ENSG00000228712.2; ENSG00000225312.2; ENSG00000232357.2; ENSG00000112474.4; ENSG00000204228.3; ENSG00000228357.2	17	3	1.45709	2.1268e-05	1.2548e+06	1.2016e+06	1.24999e+06	1.29077e+06	785759	829245	889789	906363	1.11504e+06	992756	1.08289e+06	1.06707e+06	18563.3	320554	614585	889789	787610	546171	3	3	3	3	1	3	3	3	3	3	High	High	High	High	Peak Found	High	High	High	High	Peak Found	16	12.729	0
High	Q9Y221	60S ribosome subunit biogenesis protein NIP7 homolog OS=Homo sapiens OX=9606 GN=NIP7 PE=1 SV=1	NIP7	ENSG00000132603.13	8	3	0.273144	2.45299e-05	432007	517119	490007	520374	1.99533e+06	1.53511e+06	1.7082e+06	1.97896e+06	383890	427240	424501	430189		814003	1.13773e+06	1.7082e+06	1.71968e+06	1.01657e+06	2	2	2	2		3	3	3	3	3	Peak Found	High	High	Peak Found	Not Found	Peak Found	High	High	High	High	29	9.512	0
High	Q9H4M9	EH domain-containing protein 1 OS=Homo sapiens OX=9606 GN=EHD1 PE=1 SV=2	EHD1	ENSG00000110047.17	82	13	0.549597	2.64245e-05	4.84711e+06	5.84565e+06	5.53013e+06	5.85962e+06	1.08454e+07	9.3721e+06	1.00282e+07	1.06703e+07	4.30724e+06	4.82963e+06	4.79085e+06	4.8441e+06	50672.3	4.42444e+06	6.94602e+06	1.00282e+07	9.27222e+06	5.43975e+06	11	12	10	11	1	13	13	13	13	12	High	High	High	High	Peak Found	High	High	High	High	High	36	68.042	37.46
High	Q9HCC0	Methylcrotonoyl-CoA carboxylase beta chain, mitochondrial OS=Homo sapiens OX=9606 GN=MCCC2 PE=1 SV=1	MCCC2	ENSG00000131844.15	54	11	1.43586	2.96727e-05	6.24196e+06	7.07438e+06	6.55396e+06	6.55258e+06	4.69175e+06	4.40821e+06	4.54164e+06	4.58638e+06	5.54673e+06	5.8448e+06	5.67781e+06	5.41697e+06	317931	1.91402e+06	3.26709e+06	4.54164e+06	3.98546e+06	2.70647e+06	11	11	11	11	6	9	8	9	9	10	High	High	High	High	Peak Found	High	High	High	High	High	32	50.143	10.94
High	P04083	Annexin A1 OS=Homo sapiens OX=9606 GN=ANXA1 PE=1 SV=2	ANXA1	ENSG00000135046.13	110	11	0.219809	3.31678e-05	3.11036e+06	4.81036e+06	5.52495e+06	3.85216e+06	2.39072e+07	1.7669e+07	1.89853e+07	2.0424e+07	2.76393e+06	3.97428e+06	4.78636e+06	3.18455e+06	371008	9.75303e+06	1.30952e+07	1.89853e+07	1.7748e+07	1.16415e+07	6	10	9	9	7	10	10	11	11	11	High	High	High	High	Peak Found	High	High	High	High	High	46	85.938	127.18
High	Q13423	NAD(P) transhydrogenase, mitochondrial OS=Homo sapiens OX=9606 GN=NNT PE=1 SV=3	NNT	ENSG00000112992.16	190	21	1.73933	3.38783e-05	2.81615e+07	3.10643e+07	3.21773e+07	2.85444e+07	1.51535e+07	1.84047e+07	1.73697e+07	1.69014e+07	2.50249e+07	2.5665e+07	2.78757e+07	2.35975e+07	884006	6.18194e+06	1.36405e+07	1.73697e+07	1.46869e+07	9.76251e+06	20	20	21	20	16	19	19	19	20	20	High	High	High	High	Peak Found	High	High	High	High	High	26	89.724	127.01
High	P49736	DNA replication licensing factor MCM2 OS=Homo sapiens OX=9606 GN=MCM2 PE=1 SV=4	MCM2	ENSG00000073111.13	337	28	0.836483	3.55556e-05	4.90822e+07	5.08458e+07	5.27778e+07	5.13914e+07	6.10018e+07	6.02741e+07	6.12208e+07	6.29294e+07	4.36154e+07	4.20084e+07	4.57223e+07	4.24849e+07	861034	2.4886e+07	4.46714e+07	6.12208e+07	5.46843e+07	3.4776e+07	28	27	27	27	12	28	28	28	28	27	High	High	High	High	Peak Found	High	High	High	High	High	44	162.06	332.94
High	P00966	Argininosuccinate synthase OS=Homo sapiens OX=9606 GN=ASS1 PE=1 SV=2	ASS1	ENSG00000130707.17	221	14	0.595331	3.66692e-05	2.47149e+07	2.9166e+07	2.89947e+07	2.48888e+07	4.22348e+07	4.56276e+07	4.77328e+07	4.48826e+07	2.19621e+07	2.40967e+07	2.51186e+07	2.05754e+07	561716	1.72299e+07	3.38164e+07	4.77328e+07	3.9002e+07	2.65417e+07	14	14	14	14	8	14	14	15	15	13	High	High	High	High	Peak Found	High	High	High	High	High	50	102.146	246.17
High	P12956	X-ray repair cross-complementing protein 6 OS=Homo sapiens OX=9606 GN=XRCC6 PE=1 SV=2	XRCC6	ENSG00000196419.12	504	26	0.561515	4.13598e-05	5.74546e+07	6.62074e+07	6.27738e+07	6.22546e+07	1.17216e+08	9.83224e+07	1.09169e+08	1.13493e+08	5.10553e+07	5.47e+07	5.4382e+07	5.14654e+07	1.78102e+06	4.78188e+07	7.28705e+07	1.09169e+08	9.86233e+07	5.94563e+07	26	28	24	26	20	27	26	29	28	28	High	High	High	High	High	High	High	High	High	High	55	199.646	567.71
High	P52895	Aldo-keto reductase family 1 member C2 OS=Homo sapiens OX=9606 GN=AKR1C2 PE=1 SV=3	AKR1C2	ENSG00000151632.17	477	4	0.204603	4.20997e-05	6.68967e+06	7.05441e+06	6.24836e+06	5.50612e+06	2.5832e+07	2.93444e+07	3.38905e+07	3.6317e+07	5.94457e+06	5.8283e+06	5.41306e+06	4.55187e+06	118515	1.05383e+07	2.17483e+07	3.38905e+07	3.15587e+07	1.6116e+07	4	3	4	3	1	4	4	4	4	3	High	High	High	High	Peak Found	High	High	High	High	High	70	160.861	572.18
High	Q9Y6N5	Sulfide:quinone oxidoreductase, mitochondrial OS=Homo sapiens OX=9606 GN=SQOR PE=1 SV=1	SQRDL; SQOR	ENSG00000137767.13	53	8	1.62012	4.26983e-05	8.23439e+06	9.25973e+06	8.32233e+06	8.49868e+06	4.84921e+06	5.80734e+06	5.02414e+06	5.35846e+06	7.31724e+06	7.65032e+06	7.20978e+06	7.02579e+06	155660	1.97825e+06	4.30405e+06	5.02414e+06	4.65639e+06	2.56216e+06	8	8	8	8	5	8	8	7	7	6	High	High	High	High	Peak Found	High	High	High	High	High	23	37.506	46.77
High	O43324	Eukaryotic translation elongation factor 1 epsilon-1 OS=Homo sapiens OX=9606 GN=EEF1E1 PE=1 SV=1	EEF1E1	ENSG00000124802.11	48	6	0.633535	4.83866e-05	5.92429e+06	6.5485e+06	6.94085e+06	6.41339e+06	9.2365e+06	1.02e+07	1.02596e+07	1.0493e+07	5.26444e+06	5.41032e+06	6.01298e+06	5.3019e+06	217139	3.76807e+06	7.55959e+06	1.02596e+07	9.11817e+06	5.75216e+06	5	5	5	5	2	5	5	5	5	5	High	High	High	High	Peak Found	High	High	High	High	High	44	25.124	70.21
High	P62888	60S ribosomal protein L30 OS=Homo sapiens OX=9606 GN=RPL30 PE=1 SV=2	RPL30	ENSG00000156482.10	150	6	0.761668	4.86507e-05	3.46044e+07	3.82726e+07	3.67474e+07	3.54912e+07	4.57624e+07	4.9107e+07	48061858	4.67807e+07	3.07502e+07	3.16205e+07	3.18349e+07	2.93403e+07	658459	1.8669e+07	3.63951e+07	48061858	4.06514e+07	2.27856e+07	9	9	9	9	6	9	9	9	9	9	High	High	High	High	Peak Found	High	High	High	High	High	65	50.198	160.92
High	Q14978	Nucleolar and coiled-body phosphoprotein 1 OS=Homo sapiens OX=9606 GN=NOLC1 PE=1 SV=2	NOLC1	ENSG00000166197.16	138	11	0.811039	5.00269e-05	1.79941e+07	1.99172e+07	1.89986e+07	1.90653e+07	2.32609e+07	2.36713e+07	2.41088e+07	2.32131e+07	1.59899e+07	1.64555e+07	1.64588e+07	1.57611e+07	847694	9.48939e+06	1.75437e+07	2.41088e+07	2.01717e+07	6.44139e+06	12	12	12	12	5	12	12	12	12	12	High	High	High	High	Peak Found	High	High	High	High	High	18	46.984	104.52
High	Q6UB35	Monofunctional C1-tetrahydrofolate synthase, mitochondrial OS=Homo sapiens OX=9606 GN=MTHFD1L PE=1 SV=1	MTHFD1L	ENSG00000120254.15	101	19	0.639521	5.1412e-05	6.82099e+06	8.44052e+06	8.18343e+06	8.03859e+06	1.17454e+07	1.25492e+07	1.28167e+07	1.30348e+07	6.06127e+06	6.97349e+06	7.08945e+06	6.64544e+06	64899.6	4.79159e+06	9.30071e+06	1.28167e+07	1.13269e+07	7.66509e+06	14	15	14	15	3	16	16	16	16	16	High	High	High	High	Peak Found	High	High	High	High	High	25	65.689	32.59
High	Q8IYQ7	Threonine synthase-like 1 OS=Homo sapiens OX=9606 GN=THNSL1 PE=1 SV=2	THNSL1	ENSG00000185875.12	25	7	1.44682	5.15413e-05	3.0035e+06	3.17699e+06	2.82437e+06	2.98808e+06	1.92805e+06	2.13332e+06	2.00789e+06	2.17548e+06	2.66897e+06	2.62481e+06	2.4468e+06	2.47023e+06		786556	1.58109e+06	2.00789e+06	1.89045e+06	1.3587e+06	7	6	6	6		7	6	7	6	7	High	High	High	High	Not Found	High	High	High	High	High	15	28.684	13.41
High	Q99798	Aconitate hydratase, mitochondrial OS=Homo sapiens OX=9606 GN=ACO2 PE=1 SV=2	ACO2	ENSG00000100412.15	234	24	0.626142	5.19681e-05	2.44775e+07	2.67175e+07	2.61068e+07	2.41863e+07	3.55956e+07	4.05379e+07	4.03562e+07	4.0431e+07	2.17512e+07	2.20738e+07	2.26167e+07	1.99946e+07	3.81899e+06	1.45214e+07	3.00442e+07	4.03562e+07	3.51337e+07	1.99638e+07	26	27	26	26	14	28	26	28	26	28	High	High	High	High	Peak Found	High	High	High	High	High	38	139.359	211.11
High	P13639	Elongation factor 2 OS=Homo sapiens OX=9606 GN=EEF2 PE=1 SV=4	EEF2	ENSG00000167658.15	2009	44	0.450119	5.4774e-05	3.24143e+08	3.75591e+08	3.5921e+08	3.34074e+08	8.99745e+08	7.00565e+08	7.76063e+08	7.64162e+08	2.8804e+08	3.1031e+08	3.1119e+08	2.76176e+08	1.12256e+07	3.67055e+08	5.19215e+08	7.76063e+08	6.6404e+08	4.75237e+08	63	66	63	63	43	63	66	67	68	67	High	High	High	High	High	High	High	High	High	High	69	556.525	2641.53
High	Q04446	1,4-alpha-glucan-branching enzyme OS=Homo sapiens OX=9606 GN=GBE1 PE=1 SV=3	GBE1	ENSG00000114480.12	35	10	1.78858	5.97106e-05	5.27378e+06	6.32683e+06	6.07682e+06	6.14571e+06	3.02534e+06	3.49002e+06	3.55642e+06	3.34364e+06	4.68638e+06	5.22718e+06	5.26445e+06	5.08061e+06	46496.3	1.2342e+06	2.58659e+06	3.55642e+06	2.90555e+06	1.97994e+06	9	9	9	9	3	9	8	9	7	8	High	High	High	High	Peak Found	High	High	High	High	High	22	30.078	11.79
High	Q6YN16	Hydroxysteroid dehydrogenase-like protein 2 OS=Homo sapiens OX=9606 GN=HSDL2 PE=1 SV=1	HSDL2	ENSG00000119471.14	61	10	0.679759	6.32319e-05	6.12277e+06	7.25405e+06	6.15427e+06	6.43385e+06	9.29927e+06	9.20492e+06	9.21923e+06	9.73349e+06	5.44082e+06	5.99324e+06	5.33155e+06	5.31881e+06	104840	3.79368e+06	6.82212e+06	9.21923e+06	8.45819e+06	5.45236e+06	9	9	8	9	4	9	9	9	9	9	High	High	High	High	Peak Found	High	High	High	High	High	33	47.023	31.54
High	Q96I99	Succinate--CoA ligase [GDP-forming] subunit beta, mitochondrial OS=Homo sapiens OX=9606 GN=SUCLG2 PE=1 SV=2	SUCLG2	ENSG00000172340.14	166	16	1.41346	6.74488e-05	3.08617e+07	3.43091e+07	3.41578e+07	3.13824e+07	2.28741e+07	2.34946e+07	2.41666e+07	2.27809e+07	2.74244e+07	2.8346e+07	2.95915e+07	2.59436e+07	866111	9.33158e+06	1.74127e+07	2.41666e+07	1.97961e+07	1.16377e+07	17	17	17	17	11	16	16	17	17	15	High	High	High	High	Peak Found	High	High	High	High	High	52	98.318	177.65
High	P36871	Phosphoglucomutase-1 OS=Homo sapiens OX=9606 GN=PGM1 PE=1 SV=3	PGM1	ENSG00000079739.15	56	10	1.55433	6.84327e-05	5.51363e+06	6.27964e+06	6.27783e+06	5.7042e+06	3.4991e+06	3.93427e+06	3.93262e+06	3.77618e+06	4.89952e+06	5.18819e+06	5.43859e+06	4.71562e+06	30265.6	1.42747e+06	2.91584e+06	3.93262e+06	3.28142e+06	2.58416e+06	10	10	10	10	1	9	9	9	9	10	High	High	High	High	Peak Found	High	High	High	High	High	29	49.313	32.33
High	Q9BQ69	ADP-ribose glycohydrolase MACROD1 OS=Homo sapiens OX=9606 GN=MACROD1 PE=1 SV=2	MACROD1	ENSG00000133315.10	18	3	0.574451	7.48371e-05	1.26941e+06	1.50676e+06	1.40268e+06	1.54377e+06	2.27901e+06	2.52042e+06	2.54432e+06	2.74979e+06	1.12802e+06	1.24488e+06	1.21516e+06	1.27622e+06		929733	1.86798e+06	2.54432e+06	2.38951e+06	1.08628e+06	3	3	3	3		3	3	3	3	3	High	Peak Found	High	High	Not Found	High	High	High	High	High	15	13.657	4.05
High	Q02878	60S ribosomal protein L6 OS=Homo sapiens OX=9606 GN=RPL6 PE=1 SV=3	RPL6	ENSG00000089009.15	390	12	0.771517	7.58006e-05	1.19965e+08	1.25137e+08	1.30172e+08	1.34664e+08	1.70049e+08	1.64654e+08	1.58894e+08	1.66264e+08	1.06603e+08	1.03387e+08	1.1277e+08	1.11325e+08	4.02323e+06	6.93721e+07	1.22032e+08	1.58894e+08	1.4448e+08	8.30371e+07	14	14	15	15	13	14	13	14	15	15	High	High	High	High	High	High	High	High	High	High	40	90.911	299.8
High	P56937	3-keto-steroid reductase OS=Homo sapiens OX=9606 GN=HSD17B7 PE=1 SV=1	HSD17B7	ENSG00000132196.13	8	2	1.73335	8.23173e-05	853004	1.04862e+06	921485	948135	532773	545470	579525	533146	757997	866364	798299	783816		217347	404269	579525	463292	308464	2	2	2	2		2	2	2	2	2	High	High	High	High	Not Found	High	Peak Found	High	Peak Found	Peak Found	6	6.132	3.35
High	O75083	WD repeat-containing protein 1 OS=Homo sapiens OX=9606 GN=WDR1 PE=1 SV=4	WDR1	ENSG00000071127.16	278	19	1.32178	8.25391e-05	5.58395e+07	6.12547e+07	5.90667e+07	6.03282e+07	4.38798e+07	4.50869e+07	4.78507e+07	4.5242e+07	4.96201e+07	5.06082e+07	5.11705e+07	4.98728e+07	8.92307e+06	1.7901e+07	3.34156e+07	4.78507e+07	3.93143e+07	2.54333e+07	22	21	20	21	16	21	21	21	21	23	High	High	High	High	Peak Found	High	High	High	High	High	50	142.677	299.61
High	P05783	Keratin, type I cytoskeletal 18 OS=Homo sapiens OX=9606 GN=KRT18 PE=1 SV=2	KRT18	ENSG00000111057.10	1908	27	1.35741	8.85813e-05	8.47271e+08	8.34145e+08	8.9325e+08	8.19894e+08	6.30652e+08	6.08043e+08	6.72095e+08	5.87066e+08	7.52902e+08	6.89164e+08	7.73838e+08	6.778e+08	2.23305e+07	2.57277e+08	4.50644e+08	6.72095e+08	5.10147e+08	2.69786e+08	50	50	50	50	34	49	47	50	51	48	High	High	High	High	High	High	High	High	High	High	69	411.519	2412.44
High	Q9Y4L1	Hypoxia up-regulated protein 1 OS=Homo sapiens OX=9606 GN=HYOU1 PE=1 SV=1	HYOU1	ENSG00000280682.2; ENSG00000149428.18	152	20	0.454928	9.06129e-05	7.8752e+06	1.06116e+07	1.01027e+07	9.09123e+06	2.44634e+07	2.19457e+07	1.91708e+07	2.02455e+07	6.99806e+06	8.76718e+06	8.75216e+06	7.51565e+06	82476.9	9.97994e+06	1.62648e+07	1.91708e+07	1.75929e+07	1.02747e+07	16	19	18	17	3	19	19	19	19	18	High	High	High	High	Peak Found	High	High	High	High	High	32	98.677	91.87
High	P45954	Short/branched chain specific acyl-CoA dehydrogenase, mitochondrial OS=Homo sapiens OX=9606 GN=ACADSB PE=1 SV=1	ACADSB	ENSG00000196177.12	25	6	1.45088	9.15728e-05	3.22073e+06	3.55319e+06	3.41581e+06	3.23084e+06	2.26198e+06	2.05143e+06	2.46518e+06	2.31914e+06	2.862e+06	2.93562e+06	2.95918e+06	2.67091e+06		922784	1.5204e+06	2.46518e+06	2.01528e+06	1.54472e+06	6	6	6	6		7	5	7	6	7	High	High	High	High	Not Found	Peak Found	High	High	High	High	22	28.573	5.43
High	P0DMV9	Heat shock 70 kDa protein 1B OS=Homo sapiens OX=9606 GN=HSPA1B PE=1 SV=1	HSPA1B; HSPA1A	ENSG00000232804.5; ENSG00000234475.5; ENSG00000231555.4; ENSG00000235941.5; ENSG00000204389.9; ENSG00000204388.6; ENSG00000212866.6; ENSG00000237724.5; ENSG00000224501.5	1047	25	0.74771	9.55141e-05	1.54498e+08	1.82331e+08	1.67965e+08	1.63741e+08	2.22715e+08	2.20205e+08	2.28885e+08	2.20914e+08	1.3729e+08	1.50641e+08	1.45511e+08	1.35364e+08	3.53118e+06	9.08575e+07	1.63202e+08	2.28885e+08	1.91969e+08	9.28725e+07	33	33	32	33	24	33	33	33	33	33	High	High	High	High	High	High	High	High	High	High	72	315.361	1404.3
High	Q6P996	Pyridoxal-dependent decarboxylase domain-containing protein 1 OS=Homo sapiens OX=9606 GN=PDXDC1 PE=1 SV=2	PDXDC1; LOC102724985	ENSG00000275498.5; ENSG00000179889.18	35	15	0.743664	9.58826e-05	5.23131e+06	5.66324e+06	5.47204e+06	5.42303e+06	7.16299e+06	6.84603e+06	7.48754e+06	7.66409e+06	4.64864e+06	4.67893e+06	4.74053e+06	4.48318e+06	21161.2	2.92217e+06	5.07386e+06	7.48754e+06	6.65993e+06	4.31143e+06	11	11	11	11	1	12	11	12	13	13	High	High	High	High	Peak Found	High	High	High	High	High	32	52.071	9.97
High	P30838	Aldehyde dehydrogenase, dimeric NADP-preferring OS=Homo sapiens OX=9606 GN=ALDH3A1 PE=1 SV=3	ALDH3A1	ENSG00000108602.17	217	15	0.522834	0.000101029	1.3772e+07	1.54411e+07	1.3513e+07	1.58416e+07	2.5539e+07	2.78541e+07	2.80205e+07	3.22713e+07	1.22381e+07	1.27573e+07	1.17066e+07	1.30961e+07	511233	1.04187e+07	2.06438e+07	2.80205e+07	2.80431e+07	1.44584e+07	15	16	15	16	8	15	16	16	16	16	High	High	High	High	Peak Found	High	High	High	High	High	51	106.376	189.76
High	P49821	NADH dehydrogenase [ubiquinone] flavoprotein 1, mitochondrial OS=Homo sapiens OX=9606 GN=NDUFV1 PE=1 SV=4	NDUFV1	ENSG00000167792.11	106	12	1.4199	0.000109423	8.94957e+06	9.72872e+06	9.64375e+06	9.45209e+06	6.92858e+06	6.52019e+06	7.34668e+06	6.22058e+06	7.95276e+06	8.03779e+06	8.35455e+06	7.81397e+06	559046	2.82654e+06	4.83236e+06	7.34668e+06	5.40555e+06	3.58492e+06	13	13	12	12	4	11	11	12	12	11	High	High	High	High	Peak Found	High	High	High	High	High	44	73.49	81.4
High	Q12864	Cadherin-17 OS=Homo sapiens OX=9606 GN=CDH17 PE=1 SV=3	CDH17	ENSG00000079112.9	26	8	2.41967	0.000111778	4.79792e+06	5.94736e+06	5.51307e+06	4.46928e+06	2.30647e+06	2.1133e+06	2.00816e+06	2.14802e+06	4.26353e+06	4.91366e+06	4.77607e+06	3.69472e+06	111511	940933	1.56624e+06	2.00816e+06	1.86658e+06	670348	8	8	7	7	2	5	5	5	4	3	High	High	High	High	Peak Found	High	High	High	Peak Found	High	14	29.666	17.9
High	P54136	Arginine--tRNA ligase, cytoplasmic OS=Homo sapiens OX=9606 GN=RARS1 PE=1 SV=2	RARS	ENSG00000113643.8	294	26	0.79145	0.000121538	3.22183e+07	3.64623e+07	3.53261e+07	3.54435e+07	4.56743e+07	4.29376e+07	4.42125e+07	4.52051e+07	2.86299e+07	3.01249e+07	3.06036e+07	29300849	894881	1.8633e+07	3.18227e+07	4.42125e+07	3.92822e+07	2.43544e+07	25	26	25	25	16	27	27	27	27	26	High	High	High	High	Peak Found	High	High	High	High	High	49	153.882	294.9
High	P08708	40S ribosomal protein S17 OS=Homo sapiens OX=9606 GN=RPS17 PE=1 SV=2	RPS17; RPS17L	ENSG00000278229.2; ENSG00000182774.10	208	6	0.833604	0.000121606	3.92144e+07	4.22256e+07	4.16074e+07	3.95595e+07	4.94612e+07	4.76011e+07	4.79073e+07	4.96711e+07	3.48467e+07	3.48865e+07	3.60452e+07	3.27035e+07	1.06832e+06	2.01779e+07	3.5279e+07	4.79073e+07	4.31631e+07	1.64253e+07	8	8	8	8	5	8	8	8	8	8	High	High	High	High	High	High	High	High	High	High	49	83.31	257.06
High	Q9Y6M9	NADH dehydrogenase [ubiquinone] 1 beta subcomplex subunit 9 OS=Homo sapiens OX=9606 GN=NDUFB9 PE=1 SV=3	NDUFB9	ENSG00000147684.7	25	5	1.29218	0.000128342	3.03741e+06	3.19854e+06	3.22564e+06	2.9554e+06	2.32079e+06	2.47185e+06	2.51243e+06	2.35406e+06	2.6991e+06	2.64261e+06	2.79443e+06	2.44321e+06	35790.5	946774	1.83199e+06	2.51243e+06	2.04563e+06	1.22578e+06	5	5	5	5	1	5	5	5	5	5	High	High	High	High	Peak Found	High	High	High	High	High	40	19.388	12.62
High	Q8TE67	Epidermal growth factor receptor kinase substrate 8-like protein 3 OS=Homo sapiens OX=9606 GN=EPS8L3 PE=1 SV=2	EPS8L3	ENSG00000198758.10	12	4	0.190189	0.000140231	229865	441090		328319	1.76699e+06	1.79022e+06	1.3664e+06	1.68557e+06	204263	364425		271419		720850	1.3268e+06	1.3664e+06	1.46472e+06	901181	1	2		2		3	4	3	3	3	Peak Found	Peak Found	Not Found	Peak Found	Not Found	High	High	High	High	High	10	13.001	0
High	P16989	Y-box-binding protein 3 OS=Homo sapiens OX=9606 GN=YBX3 PE=1 SV=4	CSDA; YBX3	ENSG00000060138.12	106	7	0.557871	0.000140685	3.30211e+06	3.71456e+06	3.73077e+06	3.71147e+06	5.77367e+06	7.29316e+06	6.93727e+06	6.3741e+06	2.93432e+06	3.06895e+06	3.23203e+06	3.06824e+06	25983.3	2.35539e+06	5.40524e+06	6.93727e+06	5.53896e+06	691324	6	6	6	6	1	6	7	7	6	3	High	High	High	High	Peak Found	High	High	High	High	Peak Found	42	49.84	122.62
High	P42330	Aldo-keto reductase family 1 member C3 OS=Homo sapiens OX=9606 GN=AKR1C3 PE=1 SV=4	AKR1C3	ENSG00000196139.13	534	8	0.255984	0.000145811	1.43615e+07	1.84718e+07	1.50406e+07	1.78634e+07	7.96419e+07	5.39156e+07	5.92065e+07	6.93329e+07	1.27619e+07	1.52613e+07	1.30299e+07	1.47675e+07	525305	3.24902e+07	3.9959e+07	5.92065e+07	6.02488e+07	2.94698e+07	10	10	9	10	6	11	11	10	11	11	High	High	High	High	Peak Found	High	High	High	High	High	65	170.986	655.26
High	P32929	Cystathionine gamma-lyase OS=Homo sapiens OX=9606 GN=CTH PE=1 SV=3	CTH	ENSG00000116761.11	46	8	0.64818	0.000148394	3.60766e+06	4.86177e+06	4.42379e+06	4.5001e+06	6.9656e+06	6.802e+06	7.17464e+06	6.53019e+06	3.20584e+06	4.01676e+06	3.83241e+06	3.7202e+06	15984.7	2.84165e+06	5.04122e+06	7.17464e+06	5.67459e+06	3.67795e+06	6	7	7	7	1	7	7	7	7	7	High	High	High	High	Peak Found	High	High	High	High	High	28	39.429	27.46
High	Q9UN36	Protein NDRG2 OS=Homo sapiens OX=9606 GN=NDRG2 PE=1 SV=2	NDRG2	ENSG00000165795.23	12	4	2.03886	0.000161542	1.74301e+06	1.51198e+06	1.7445e+06	1.57585e+06	855593	812510	815292	464926	1.54887e+06	1.24918e+06	1.51129e+06	1.30274e+06	19143.7	349043	602182	815292	404011	278197	4	3	4	4	1	3	3	3	2	2	High	High	High	High	Peak Found	High	Peak Found	High	Peak Found	Peak Found	20	14.981	2.01
High	Q9NY33	Dipeptidyl peptidase 3 OS=Homo sapiens OX=9606 GN=DPP3 PE=1 SV=2	DPP3	ENSG00000254986.7	170	22	1.40207	0.00016276	2.30656e+07	2.61542e+07	2.68961e+07	2.53487e+07	1.77841e+07	1.81776e+07	1.85559e+07	1.86008e+07	2.04965e+07	2.16084e+07	2.33006e+07	2.09556e+07	334159	7.25509e+06	1.34722e+07	1.85559e+07	1.61637e+07	1.085e+07	20	20	20	20	10	19	19	20	19	20	High	High	High	High	Peak Found	High	High	High	High	High	45	138.664	120.28
High	Q86Y39	NADH dehydrogenase [ubiquinone] 1 alpha subcomplex subunit 11 OS=Homo sapiens OX=9606 GN=NDUFA11 PE=1 SV=3	NDUFA11	ENSG00000174886.12	23	3	1.34847	0.000169138	1.30235e+06	1.33891e+06	1.25628e+06	1.20811e+06	948341	949099	1.01828e+06	883701	1.15729e+06	1.1062e+06	1.08834e+06	998737		386880	703413	1.01828e+06	767916	579726	2	2	2	2		2	2	2	2	2	High	High	High	High	Not Found	High	High	High	High	High	39	17.501	6.81
High	P13010	X-ray repair cross-complementing protein 5 OS=Homo sapiens OX=9606 GN=XRCC5 PE=1 SV=3	XRCC5	ENSG00000079246.15	485	31	0.554446	0.000174699	6.26503e+07	7.19933e+07	6.7141e+07	6.50684e+07	1.29948e+08	1.01911e+08	1.17224e+08	1.21229e+08	5.56723e+07	5.94803e+07	5.81654e+07	5.37915e+07	1.79465e+06	5.3013e+07	7.553e+07	1.17224e+08	1.05346e+08	7.33301e+07	33	32	33	33	19	35	33	34	36	34	High	High	High	High	High	High	High	High	High	High	67	245.627	589.16
High	Q01581	Hydroxymethylglutaryl-CoA synthase, cytoplasmic OS=Homo sapiens OX=9606 GN=HMGCS1 PE=1 SV=2	HMGCS1	ENSG00000112972.14	479	21	1.89804	0.000179115	1.09454e+08	1.26747e+08	1.40235e+08	1.30847e+08	6.64079e+07	6.93078e+07	7.49264e+07	5.87841e+07	9.72626e+07	1.04718e+08	1.21488e+08	1.0817e+08	2.1494e+06	2.70914e+07	5.13666e+07	7.49264e+07	5.10821e+07	3.29307e+07	26	26	26	26	18	24	24	24	24	25	High	High	High	High	High	High	High	High	High	High	62	191.97	599.29
High	Q9Y446	Plakophilin-3 OS=Homo sapiens OX=9606 GN=PKP3 PE=1 SV=1	PKP3	ENSG00000184363.9	89	18	0.661603	0.000188526	6.20183e+06	6.88952e+06	6.23634e+06	7.59332e+06	9.5717e+06	1.01279e+07	9.71154e+06	1.06189e+07	5.51107e+06	5.69207e+06	5.40265e+06	6.27734e+06	65515.2	3.90482e+06	7.5062e+06	9.71154e+06	9.22762e+06	5.93214e+06	16	16	16	17	3	16	17	17	17	17	High	High	High	High	Peak Found	High	High	High	High	High	31	71.602	21.14
High	O43169	Cytochrome b5 type B OS=Homo sapiens OX=9606 GN=CYB5B PE=1 SV=3			224	5	1.52476	0.000188961	6.15208e+07	6.83441e+07	6.92579e+07	6.44747e+07	3.39456e+07	4.3872e+07	4.40791e+07	4.32361e+07	5.46686e+07	5.64653e+07	5.99994e+07	5.33007e+07	2.25257e+06	1.38482e+07	3.25152e+07	4.40791e+07	3.75713e+07	2.4723e+07	9	9	8	9	8	6	7	8	8	8	High	High	High	High	High	High	High	High	High	High	60	85.084	293.71
High	P26640	Valine--tRNA ligase OS=Homo sapiens OX=9606 GN=VARS1 PE=1 SV=4	VARS; VARS2	ENSG00000096171.14; ENSG00000204394.12; ENSG00000226589.9	425	39	1.47977	0.000200653	7.34919e+07	8.606e+07	8.23359e+07	8.55059e+07	5.93473e+07	5.61064e+07	5.7318e+07	5.34644e+07	6.53063e+07	7.11021e+07	7.1329e+07	7.06871e+07	2.02309e+06	2.4211e+07	4.15826e+07	5.7318e+07	4.64594e+07	3.14734e+07	40	40	40	41	25	40	39	39	39	39	High	High	High	High	High	High	High	High	High	High	45	236.039	485.63
High	Q6NUQ4	Transmembrane protein 214 OS=Homo sapiens OX=9606 GN=TMEM214 PE=1 SV=2	TMEM214	ENSG00000119777.18	22	5	0.354148	0.000203804	1.04228e+06	1.02989e+06	1.65351e+06	1.22171e+06	2.53347e+06	3.27701e+06	3.16796e+06	3.22481e+06	926188	850891	1.43246e+06	1.00998e+06		1.03354e+06	2.42872e+06	3.16796e+06	2.80228e+06	1.76939e+06	4	3	5	4		4	5	4	5	5	High	Peak Found	High	High	Not Found	High	High	High	High	High	11	15.788	17.85
High	Q13451	Peptidyl-prolyl cis-trans isomerase FKBP5 OS=Homo sapiens OX=9606 GN=FKBP5 PE=1 SV=2	FKBP5	ENSG00000096060.14	29	6	0.83196	0.000211843	1.92375e+06	2.02406e+06	2.05017e+06	1.85026e+06	2.46317e+06	2.33737e+06	2.37048e+06	2.37471e+06	1.70948e+06	1.67226e+06	1.7761e+06	1.5296e+06		1.00486e+06	1.73231e+06	2.37048e+06	2.06357e+06	1.25745e+06	5	5	5	5		5	5	5	5	5	High	High	High	High	Not Found	High	High	High	High	High	19	25.678	3.73
High	P61313	60S ribosomal protein L15 OS=Homo sapiens OX=9606 GN=RPL15 PE=1 SV=2	RPL15	ENSG00000174748.18	173	7	0.839914	0.000224444	5.56221e+07	6.07328e+07	6.04311e+07	6.2074e+07	7.54378e+07	7.22201e+07	7.15462e+07	7.20373e+07	4.94269e+07	5.0177e+07	5.23525e+07	5.13161e+07	1.54481e+06	3.07752e+07	5.35251e+07	7.15462e+07	6.25989e+07	4.03229e+07	8	8	8	8	8	8	8	8	8	8	High	High	High	High	High	High	High	High	High	High	32	43.805	166.02
High	Q9BZF1	Oxysterol-binding protein-related protein 8 OS=Homo sapiens OX=9606 GN=OSBPL8 PE=1 SV=3	OSBPL8	ENSG00000091039.16	13	3	0.392001	0.000227716	551979	682538	353919	328048	1.20498e+06	1.177e+06	1.13396e+06	1.11667e+06	490500	563908	306607	271195		491578	872316	1.13396e+06	970359	657187	3	3	2	2		3	3	3	3	3	Peak Found	High	Peak Found	High	Not Found	High	High	High	High	High	5	13.496	3.93
High	P53634	Dipeptidyl peptidase 1 OS=Homo sapiens OX=9606 GN=CTSC PE=1 SV=2	CTSC	ENSG00000109861.15	13	3	1.45226	0.000233971	1.44916e+06	1.52532e+06	1.69707e+06	1.53693e+06	1.14943e+06	1.09504e+06	1.01357e+06	1.00757e+06	1.28776e+06	1.26021e+06	1.4702e+06	1.27057e+06	18787.2	468914	811573	1.01357e+06	875560	734625	3	3	3	3	1	3	2	2	3	2	Peak Found	High	High	High	Peak Found	Peak Found	High	High	High	High	10	6.58	3.51
High	P23246	Splicing factor, proline- and glutamine-rich OS=Homo sapiens OX=9606 GN=SFPQ PE=1 SV=2	SFPQ	ENSG00000116560.10	252	14	0.741576	0.000238562	4.33775e+07	4.63228e+07	4.54809e+07	4.93637e+07	6.20215e+07	5.75167e+07	6.17739e+07	6.50789e+07	3.85461e+07	38271538	3.94009e+07	4.08086e+07	907383	2.53019e+07	4.26278e+07	6.17739e+07	5.65521e+07	2.37819e+07	14	14	14	15	9	14	13	15	15	13	High	High	High	High	Peak Found	High	High	High	High	High	25	104.953	289.31
High	Q13442	28 kDa heat- and acid-stable phosphoprotein OS=Homo sapiens OX=9606 GN=PDAP1 PE=1 SV=1	PDAP1	ENSG00000106244.12	55	5	0.791575	0.000247639	6.29969e+06	6.89046e+06	7.32648e+06	7.19848e+06	8.91943e+06	8.8792e+06	9.00115e+06	8.56682e+06	5.59803e+06	5.69285e+06	6.34706e+06	5.95093e+06	17648	3.63872e+06	6.58072e+06	9.00115e+06	7.44438e+06	514842	5	5	5	5	1	5	5	5	5	4	High	High	High	High	Peak Found	High	High	High	High	Peak Found	31	28.524	108.46
High	P05787	Keratin, type II cytoskeletal 8 OS=Homo sapiens OX=9606 GN=KRT8 PE=1 SV=7	KRT8	ENSG00000170421.12	2850	33	1.4429	0.000247767	8.53155e+08	9.32552e+08	9.53312e+08	8.63286e+08	5.92765e+08	6.47738e+08	6.94845e+08	5.96868e+08	7.58131e+08	7.70467e+08	8.25871e+08	7.13672e+08	1.54348e+07	2.41821e+08	4.80063e+08	6.94845e+08	5.18665e+08	2.93165e+08	54	55	54	55	38	56	53	55	55	53	High	High	High	High	High	High	High	High	High	High	80	405.009	3193.92
High	Q14315	Filamin-C OS=Homo sapiens OX=9606 GN=FLNC PE=1 SV=3	FLNC	ENSG00000128591.15	70	2	0.615825	0.000249101	2.01959e+06	2.20203e+06	1.99106e+06	1.85876e+06	3.14709e+06	2.8082e+06	3.36556e+06	3.36804e+06	1.79465e+06	1.8193e+06	1.72489e+06	1.53663e+06	78734.1	1.28387e+06	2.08127e+06	3.36556e+06	2.92675e+06	2.19843e+06	2	2	1	1	2	3	2	3	3	3	Peak Found	High	Peak Found	Peak Found	Peak Found	Peak Found	Peak Found	Peak Found	High	High	5	43.81	58.14
High	Q9H2U2	Inorganic pyrophosphatase 2, mitochondrial OS=Homo sapiens OX=9606 GN=PPA2 PE=1 SV=2	PPA2	ENSG00000138777.19	106	12	1.31173	0.000250492	1.42568e+07	1.61934e+07	1.57453e+07	1.48943e+07	1.15255e+07	1.16554e+07	1.21747e+07	1.17028e+07	1.26689e+07	1.33788e+07	1.36405e+07	1.2313e+07	360350	4.70188e+06	8.63824e+06	1.21747e+07	1.01695e+07	5.0882e+06	12	12	12	12	7	12	11	12	12	11	High	High	High	High	Peak Found	High	High	High	High	High	55	69.6	68.45
High	P50213	Isocitrate dehydrogenase [NAD] subunit alpha, mitochondrial OS=Homo sapiens OX=9606 GN=IDH3A PE=1 SV=1	IDH3A	ENSG00000166411.13	86	10	1.35162	0.000258719	1.27433e+07	1.25683e+07	1.25121e+07	1.17295e+07	8.90566e+06	9.65013e+06	9.68397e+06	8.13517e+06	11323917	1.03839e+07	1.08395e+07	9.69671e+06	384039	3.6331e+06	7.15208e+06	9.68397e+06	7.06928e+06	5.62486e+06	10	10	10	10	7	10	10	10	9	10	High	High	High	High	Peak Found	High	High	High	High	High	32	48.909	88.35
High	Q15800	Methylsterol monooxygenase 1 OS=Homo sapiens OX=9606 GN=MSMO1 PE=1 SV=1	MSMO1	ENSG00000052802.12	8	2	1.64185	0.000266137	1.1576e+06	1.32457e+06	1.31732e+06	1.32441e+06	667532	888141	850310	758686	1.02866e+06	1.09435e+06	1.14122e+06	1.09488e+06		272322	658235	850310	659281	389738	2	2	2	2		2	2	2	2	2	High	High	High	High	Not Found	High	High	High	High	Peak Found	7	7.551	3.51
High	Q8IZW8	Tensin-4 OS=Homo sapiens OX=9606 GN=TNS4 PE=1 SV=3	TNS4	ENSG00000131746.12	48	9	0.584546	0.000276145	3.24132e+06	3.23858e+06	3.42072e+06	2.86604e+06	4.84381e+06	6.22842e+06	5.67013e+06	5.41522e+06	2.8803e+06	2.67569e+06	2.96343e+06	2.36933e+06	58854.8	1.97605e+06	4.61612e+06	5.67013e+06	4.7057e+06	2.79356e+06	9	9	8	8	3	9	10	9	9	10	High	High	High	High	Peak Found	High	High	High	High	High	19	40.283	10.87
High	P16152	Carbonyl reductase [NADPH] 1 OS=Homo sapiens OX=9606 GN=CBR1 PE=1 SV=3	CBR1; SETD4	ENSG00000159228.12	200	10	0.735039	0.000291776	2.26512e+07	2.63625e+07	2.54092e+07	2.34206e+07	3.23726e+07	3.38743e+07	3.62581e+07	3.25573e+07	20128285	2.17805e+07	22012450	1.93616e+07	455858	1.32065e+07	2.51056e+07	3.62581e+07	2.82916e+07	1.70379e+07	10	10	10	10	8	10	10	10	9	10	High	High	High	High	Peak Found	High	High	High	High	High	66	92.24	338
High	P10515	Dihydrolipoyllysine-residue acetyltransferase component of pyruvate dehydrogenase complex, mitochondrial OS=Homo sapiens OX=9606 GN=DLAT PE=1 SV=3	DLAT	ENSG00000150768.15	132	11	1.44277	0.000292136	1.83571e+07	2.04547e+07	2.16767e+07	1.87227e+07	1.32015e+07	1.39528e+07	1.42065e+07	1.29197e+07	1.63125e+07	1.68995e+07	1.87789e+07	1.54779e+07	742128	5.38559e+06	1.0341e+07	1.42065e+07	1.1227e+07	7.14388e+06	12	12	13	13	6	12	12	12	13	12	High	High	High	High	Peak Found	High	High	High	High	High	27	74.637	76.41
High	P29401	Transketolase OS=Homo sapiens OX=9606 GN=TKT PE=1 SV=3	TKT	ENSG00000163931.15	808	25	0.751936	0.000294921	3.07811e+08	3.62273e+08	3.23457e+08	3.25863e+08	4.42115e+08	4.10777e+08	4.31747e+08	4.31784e+08	2.73527e+08	2.99307e+08	2.80216e+08	2.69388e+08	7.35459e+06	1.80363e+08	3.04442e+08	4.31747e+08	3.75211e+08	2.45188e+08	33	34	31	33	23	33	35	34	34	34	High	High	High	High	High	High	High	High	High	High	59	287.629	1175.94
High	P23786	Carnitine O-palmitoyltransferase 2, mitochondrial OS=Homo sapiens OX=9606 GN=CPT2 PE=1 SV=2	CPT2	ENSG00000157184.6	16	5	1.27855	0.000297682	3.83654e+06	3.88058e+06	4.18631e+06	4.14953e+06	3.25824e+06	3.0224e+06	3.00732e+06	3.28275e+06	3.40923e+06	3.20611e+06	3.62668e+06	3.43038e+06	81140.4	1.32921e+06	2.24002e+06	3.00732e+06	2.85264e+06	1.89606e+06	5	3	4	5	2	4	3	4	5	4	High	High	High	High	Peak Found	High	High	Peak Found	Peak Found	High	10	17.172	2.22
High	P26641	Elongation factor 1-gamma OS=Homo sapiens OX=9606 GN=EEF1G PE=1 SV=3	EEF1G	ENSG00000254772.9	571	23	0.792591	0.000297688	1.10548e+08	1.24242e+08	1.17844e+08	1.21162e+08	1.61984e+08	1.4634e+08	1.48374e+08	1.53175e+08	9.82351e+07	1.02648e+08	1.0209e+08	1.00163e+08	2.84764e+06	6.60821e+07	1.08458e+08	1.48374e+08	1.33106e+08	93100602	24	24	24	24	15	24	23	24	24	24	High	High	High	High	Peak Found	High	High	High	High	High	73	177.541	714.01
High	O00483	Cytochrome c oxidase subunit NDUFA4 OS=Homo sapiens OX=9606 GN=NDUFA4 PE=1 SV=1	NDUFA4	ENSG00000189043.9	49	2	1.55326	0.000315696	7.2336e+06	8.08123e+06	8.40453e+06	7.65302e+06	3.74956e+06	5.06472e+06	5.10901e+06	5.06512e+06	6.42792e+06	6.67665e+06	7280988	6.32669e+06	336957	1.52965e+06	3.75366e+06	5.10901e+06	4.40148e+06	3.23384e+06	2	2	2	2	2	2	2	2	2	2	High	High	High	High	Peak Found	High	High	High	High	High	22	7.037	28.3
High	P09327	Villin-1 OS=Homo sapiens OX=9606 GN=VIL1 PE=1 SV=4	VIL1	ENSG00000127831.10	127	21	1.4864	0.000321483	1.72701e+07	1.89925e+07	1.84099e+07	1.78428e+07	9.3713e+06	1.16731e+07	1.27164e+07	1.28074e+07	1.53465e+07	1.56915e+07	1.59488e+07	1.47505e+07	243159	3.82306e+06	8.65137e+06	1.27164e+07	1.11294e+07	7.82422e+06	20	20	19	20	9	18	18	19	19	20	High	High	High	High	Peak Found	High	High	High	High	High	38	81.144	63.13
High	P05067	Amyloid-beta precursor protein OS=Homo sapiens OX=9606 GN=APP PE=1 SV=3	APP	ENSG00000142192.20	40	11	2.75369	0.000326093	6.35913e+06	8.86463e+06	9.31733e+06	7.52481e+06	2.60008e+06	3.06605e+06	3.3162e+06	2.88577e+06	5.65085e+06	7.32389e+06	8.07177e+06	6.22071e+06	84301.4	1.06071e+06	2.27237e+06	3.3162e+06	2507672	916307	11	11	11	11	2	11	11	10	11	6	High	High	High	High	Peak Found	Peak Found	High	High	High	Peak Found	19	42.686	25.41
High	P17858	ATP-dependent 6-phosphofructokinase, liver type OS=Homo sapiens OX=9606 GN=PFKL PE=1 SV=6	PFKL	ENSG00000141959.16	364	23	1.53859	0.000327594	6.52519e+07	7.17906e+07	6.89129e+07	7.48741e+07	5.39067e+07	4.27212e+07	4.55539e+07	4.58956e+07	5.79842e+07	5.93128e+07	5.97004e+07	6.18978e+07	1.25056e+06	2.19915e+07	3.16623e+07	4.55539e+07	3.98823e+07	2.54698e+07	24	23	24	24	12	24	23	23	24	24	High	High	High	High	High	High	High	High	High	High	54	201.148	400.5
High	P11177	Pyruvate dehydrogenase E1 component subunit beta, mitochondrial OS=Homo sapiens OX=9606 GN=PDHB PE=1 SV=3	PDHB	ENSG00000168291.12	164	13	1.38998	0.000335831	2.85252e+07	3.14851e+07	3.23232e+07	2.8829e+07	1.96373e+07	2.31064e+07	2.13009e+07	2.20912e+07	2.53481e+07	2.60128e+07	2.80022e+07	2.38327e+07	411833	8.01112e+06	1.71251e+07	2.13009e+07	1.91968e+07	1.30212e+07	12	14	12	13	5	12	12	13	13	13	High	High	High	High	Peak Found	High	High	High	High	High	48	80.993	142.17
High	P35251	Replication factor C subunit 1 OS=Homo sapiens OX=9606 GN=RFC1 PE=1 SV=4	RFC1	ENSG00000035928.15	15	2	0.742819	0.000335998	525746	592192	613518	536945	784407	742949	777122	720928	467188	489265	531502	443888		320002	550628	777122	626471	371619	2	2	2	2		2	2	2	2	2	High	High	High	Peak Found	Not Found	High	High	High	High	High	2	6.738	0
High	Q8TCT9	Minor histocompatibility antigen H13 OS=Homo sapiens OX=9606 GN=HM13 PE=1 SV=1	HM13	ENSG00000101294.16	52	7	0.75641	0.000340185	3.65689e+06	3.94995e+06	4.05502e+06	3.92319e+06	4.97797e+06	5.43059e+06	5.46088e+06	4.8565e+06	3.24959e+06	3.26342e+06	3.51293e+06	3.24327e+06	91743.9	2.03079e+06	4.02482e+06	5.46088e+06	4.22019e+06	2.29934e+06	6	5	5	6	3	7	7	7	6	6	High	High	High	High	Peak Found	High	High	High	High	High	21	29.842	38.63
High	P08865	40S ribosomal protein SA OS=Homo sapiens OX=9606 GN=RPSA PE=1 SV=4	RPSA	ENSG00000168028.13	469	12	0.826752	0.000343652	1.01842e+08	1.11785e+08	1.12356e+08	1.04151e+08	1.26585e+08	1.31253e+08	1.29932e+08	1.35026e+08	9.04986e+07	9.23556e+07	9.73364e+07	8.61005e+07	2.33031e+06	5.16408e+07	9.72767e+07	1.29932e+08	1.17335e+08	6.94621e+07	16	16	16	16	12	16	16	16	16	16	High	High	High	High	High	High	High	High	High	High	54	132.317	644.01
High	P48506	Glutamate--cysteine ligase catalytic subunit OS=Homo sapiens OX=9606 GN=GCLC PE=1 SV=2	GCLC	ENSG00000001084.10	46	10	0.736376	0.000351635	3.524e+06	4.26592e+06	4.20593e+06	4.01155e+06	5.26716e+06	5.62314e+06	5.53622e+06	5.95438e+06	3.13149e+06	3.52447e+06	3.64367e+06	3.31632e+06	81880.1	2.14876e+06	4.16752e+06	5.53622e+06	5.17422e+06	3.1415e+06	9	10	9	10	1	10	10	10	10	9	High	High	High	High	Peak Found	High	High	High	High	High	21	41.765	16.06
High	Q13895	Bystin OS=Homo sapiens OX=9606 GN=BYSL PE=1 SV=3	BYSL	ENSG00000112578.9	19	3	0.768065	0.000358148	980181	1.07993e+06	1.07405e+06	1.07203e+06	1.53684e+06	1.4155e+06	1.37864e+06	1.32887e+06	871008	892233	930469	886240		626962	1.04908e+06	1.37864e+06	1.15476e+06	733170	3	3	3	3		3	3	3	3	3	High	High	High	High	Not Found	Peak Found	High	High	High	High	8	11.487	5.92
High	P61006	Ras-related protein Rab-8A OS=Homo sapiens OX=9606 GN=RAB8A PE=1 SV=1	RAB8A	ENSG00000167461.11	92	5	0.742156	0.00037134	3.25634e+06	3.70336e+06	3.34057e+06	3.34441e+06	4.37084e+06	4.21539e+06	4.63667e+06	4.67733e+06	2.89365e+06	3.05969e+06	2.89399e+06	2.7648e+06		1.7831e+06	3.12419e+06	4.63667e+06	4.0645e+06	2.8564e+06	5	5	5	5		5	5	5	5	5	High	High	High	High	Not Found	High	High	High	High	High	37	32.274	99.1
High	P18124	60S ribosomal protein L7 OS=Homo sapiens OX=9606 GN=RPL7 PE=1 SV=1	RPL7	ENSG00000147604.13	287	11	0.830349	0.00037359	1.01313e+08	1.12034e+08	1.10991e+08	1.13656e+08	1.30607e+08	1.37485e+08	1.31107e+08	1.3865e+08	9.00285e+07	9.25617e+07	9.61534e+07	9.39589e+07	3.24761e+06	5.32818e+07	1.01895e+08	1.31107e+08	1.20483e+08	8.11341e+07	15	15	15	15	11	14	15	15	15	15	High	High	High	High	High	High	High	High	High	High	47	82.047	307.13
High	P35658	Nuclear pore complex protein Nup214 OS=Homo sapiens OX=9606 GN=NUP214 PE=1 SV=2	NUP214	ENSG00000126883.16	33	12	0.776105	0.000374556	2.89357e+06	2.75032e+06	2.79083e+06	3.03363e+06	3.80959e+06	3.73053e+06	3.41266e+06	3.59375e+06	2.57129e+06	2.27229e+06	2417747	2.50788e+06	24362.7	1.55414e+06	2.76484e+06	3.41266e+06	3.12289e+06	1.80205e+06	10	8	8	10	1	10	10	10	9	10	High	High	High	Peak Found	Peak Found	High	High	High	High	High	9	37.804	12.13
High	Q92621	Nuclear pore complex protein Nup205 OS=Homo sapiens OX=9606 GN=NUP205 PE=1 SV=3	NUP205	ENSG00000155561.14	105	27	0.85674	0.000387118	9.88083e+06	1.08269e+07	1.101e+07	1.09119e+07	1.28427e+07	1.26517e+07	1.23751e+07	1.27221e+07	8.7803e+06	8.94514e+06	9.53812e+06	9.02075e+06	210544	5.23923e+06	9.37669e+06	1.23751e+07	1.10552e+07	7.81066e+06	24	23	24	24	4	24	26	24	25	25	High	High	High	High	Peak Found	High	High	High	High	High	19	105.694	45.71
High	O95478	Ribosome biogenesis protein NSA2 homolog OS=Homo sapiens OX=9606 GN=NSA2 PE=1 SV=1	NSA2	ENSG00000164346.9	25	4	0.786457	0.000388981	817983	892224	962429	897809	1.087e+06	1.16328e+06	1.1402e+06	1.13587e+06	726876	737149	833769	742212		443448	862148	1.1402e+06	987050	378396	3	3	3	3		3	3	3	3	3	High	High	High	High	Not Found	High	High	High	High	Peak Found	20	11.279	0
High	P05388	60S acidic ribosomal protein P0 OS=Homo sapiens OX=9606 GN=RPLP0 PE=1 SV=1	RPLP0	ENSG00000089157.15	394	10	0.836491	0.000411261	9.05147e+07	9.75594e+07	9.49643e+07	9.48644e+07	1.14021e+08	1.06663e+08	1.12914e+08	1.16632e+08	8.04332e+07	8.06028e+07	8.22692e+07	7.84236e+07	2.23642e+06	4.65151e+07	7.90517e+07	1.12914e+08	1.01351e+08	6.5989e+07	10	10	10	10	9	11	10	10	11	10	High	High	High	High	High	High	High	High	High	High	51	85.617	709.23
High	P62241	40S ribosomal protein S8 OS=Homo sapiens OX=9606 GN=RPS8 PE=1 SV=2	RPS8	ENSG00000142937.11	354	10	0.825441	0.000438721	8.88385e+07	1.01676e+08	1.02927e+08	1.02146e+08	1.21039e+08	1.24747e+08	1.22178e+08	1.25012e+08	7.89436e+07	8.40037e+07	8.91676e+07	8.44435e+07	1.95414e+06	4.93784e+07	9.24544e+07	1.22178e+08	1.08633e+08	4.46478e+07	10	10	10	10	9	10	10	10	10	10	High	High	High	High	High	High	High	High	High	High	58	79.492	411.64
High	P30041	Peroxiredoxin-6 OS=Homo sapiens OX=9606 GN=PRDX6 PE=1 SV=3	PRDX6	ENSG00000117592.8	301	12	0.775703	0.000450035	4.39162e+07	4.90172e+07	4.96578e+07	5.12249e+07	6.0977e+07	6.16414e+07	6.55659e+07	6.75948e+07	3.90248e+07	4.04977e+07	4.30194e+07	4.23472e+07	1.11438e+06	2.48758e+07	4.56848e+07	6.55659e+07	5.87384e+07	3.29258e+07	14	14	14	14	9	14	14	14	14	14	High	High	High	High	High	High	High	High	High	High	65	72.251	233.83
High	P30740	Leukocyte elastase inhibitor OS=Homo sapiens OX=9606 GN=SERPINB1 PE=1 SV=1	SERPINB1	ENSG00000021355.12	256	15	1.3411	0.000451842	5.65443e+07	6.3684e+07	6.40667e+07	6.19121e+07	4.4213e+07	4.49414e+07	4.90804e+07	4.87102e+07	5.02464e+07	5.26152e+07	5.55021e+07	5.11822e+07	1.38735e+06	1.80369e+07	3.33078e+07	4.90804e+07	4.23281e+07	2.68192e+07	17	17	17	17	14	16	17	17	17	17	High	High	High	High	High	High	High	High	High	High	53	113.815	349.09
High	Q16658	Fascin OS=Homo sapiens OX=9606 GN=FSCN1 PE=1 SV=3	FSCN1	ENSG00000075618.17	343	23	0.806573	0.000493066	6.35738e+07	7.07502e+07	7.02367e+07	6.92688e+07	9.31236e+07	8.48227e+07	8.30434e+07	8.81382e+07	5.64929e+07	5.84533e+07	6.08473e+07	5.7264e+07	1.39982e+06	3.79902e+07	6.28653e+07	8.30434e+07	7.65902e+07	3.54889e+07	22	22	23	21	15	24	23	21	25	22	High	High	High	High	Peak Found	High	High	High	High	High	67	170.779	376.66
High	A0FGR8	Extended synaptotagmin-2 OS=Homo sapiens OX=9606 GN=ESYT2 PE=1 SV=1	ESYT2		4	2	1.58277	0.000515909	382761	388534	352426	336062	236468	220189	280303	228028	340129	321004	305313	277820		96468	163191	280303	198151	166639	2	2	2	2		2	2	2	2	2	Peak Found	High	High	Peak Found	Not Found	High	Peak Found	High	Peak Found	Peak Found	3	6.22	1.86
High	Q9H223	EH domain-containing protein 4 OS=Homo sapiens OX=9606 GN=EHD4 PE=1 SV=1	EHD4	ENSG00000103966.10	16	5	0.614004	0.00053706	1.68794e+06	1.80015e+06	1.10117e+06	1.56565e+06	2.50167e+06	2.60409e+06	2.79258e+06	2.69488e+06	1.49994e+06	1.48727e+06	953963	1.29431e+06		1.02057e+06	1.92999e+06	2.79258e+06	2.3418e+06	1.33695e+06	5	4	3	4		5	4	5	5	4	Peak Found	High	Peak Found	High	Not Found	Peak Found	High	High	High	High	14	18.429	5.41
High	P08727	Keratin, type I cytoskeletal 19 OS=Homo sapiens OX=9606 GN=KRT19 PE=1 SV=4	KRT19	ENSG00000171345.13	663	13	1.68034	0.000539357	6.80107e+07	7.58207e+07	7.99473e+07	7.06338e+07	3.5901e+07	4.71535e+07	5.18983e+07	4.00044e+07	6.04357e+07	6.26425e+07	6.92597e+07	5.83924e+07	1.20859e+06	1.4646e+07	3.49472e+07	5.18983e+07	3.47629e+07	2.24011e+07	15	16	16	16	12	15	16	16	15	15	High	High	High	High	High	High	High	High	High	High	73	168.321	650.92
High	P00491	Purine nucleoside phosphorylase OS=Homo sapiens OX=9606 GN=PNP PE=1 SV=2	PNP	ENSG00000198805.11	227	13	0.784677	0.000540527	1.78378e+07	1.89048e+07	2.00823e+07	1.894e+07	2.45701e+07	2.22204e+07	2.45691e+07	2.36606e+07	1.58511e+07	1.5619e+07	1.73976e+07	1.56576e+07	328853	1.00235e+07	1.64684e+07	2.45691e+07	2.05606e+07	1.17667e+07	15	14	15	15	7	14	14	14	14	14	High	High	High	High	Peak Found	High	High	High	High	High	66	105.162	263.79
High	Q7Z2W4	Zinc finger CCCH-type antiviral protein 1 OS=Homo sapiens OX=9606 GN=ZC3HAV1 PE=1 SV=3	ZC3HAV1	ENSG00000105939.12	49	9	0.823896	0.000548313	3.02983e+06	3.0298e+06	3.07208e+06	3.12167e+06	4.0503e+06	3.57753e+06	3.68794e+06	3.71824e+06	2.69237e+06	2.5032e+06	2.6614e+06	2.58066e+06	9629.14	1.65234e+06	2.65144e+06	3.68794e+06	3.23107e+06	1.48406e+06	10	9	9	9	1	9	9	9	9	8	High	High	High	High	Peak Found	High	High	High	High	High	16	38.032	28.11
High	Q01628	Interferon-induced transmembrane protein 3 OS=Homo sapiens OX=9606 GN=IFITM3 PE=1 SV=2	IFITM3	ENSG00000142089.15	58	2	1.54123	0.000564767	2.12795e+07	1.95239e+07	2.30435e+07	1.88187e+07	1.16347e+07	1.30076e+07	1.3467e+07	1.4605e+07	1.89094e+07	1.61305e+07	1.9963e+07	1.55573e+07	697979	4.74641e+06	9.64041e+06	1.3467e+07	1.26914e+07	7.10351e+06	3	3	3	3	2	3	3	3	3	3	High	High	High	High	High	High	High	High	High	High	31	40.311	123.26
High	P19224	UDP-glucuronosyltransferase 1-6 OS=Homo sapiens OX=9606 GN=UGT1A6 PE=1 SV=2	UGT1A6	ENSG00000167165.18	290	11	0.636432	0.000568708	1.90104e+07	2.23384e+07	2.04439e+07	2.40384e+07	2.92195e+07	3.37038e+07	3.35182e+07	3.56522e+07	1.6893e+07	1.84558e+07	1.77109e+07	1.98724e+07	402452	1.19202e+07	2.49792e+07	3.35182e+07	3.0981e+07	1.91072e+07	12	12	12	12	8	12	12	12	12	12	High	High	High	High	Peak Found	High	High	High	High	High	42	106.026	285.02
High	P57678	Gem-associated protein 4 OS=Homo sapiens OX=9606 GN=GEMIN4 PE=1 SV=2	GEMIN4	ENSG00000179409.10	19	7	0.68823	0.000596434	3.18726e+06	3.67479e+06	3.69199e+06	3.79534e+06	4.983e+06	6.1256e+06	5.19014e+06	5.51381e+06	2.83226e+06	3.03609e+06	3.19843e+06	3.13758e+06	82914.5	2.03284e+06	4.53991e+06	5.19014e+06	4.79138e+06	3.58164e+06	5	5	5	5	1	5	6	5	5	6	High	High	High	High	Peak Found	High	High	High	High	High	9	17.001	0
High	Q96DB5	Regulator of microtubule dynamics protein 1 OS=Homo sapiens OX=9606 GN=RMDN1 PE=1 SV=1	FAM82B; RMDN1	ENSG00000176623.11	14	4	2.16801	0.000599687	1.29216e+06	1.4147e+06	1.39914e+06	1.39242e+06	643806	803500	423477		1.14824e+06	1.16881e+06	1.2121e+06	1.15111e+06		262643	595504	423477		455753	4	4	4	4		2	3	2		3	High	High	High	High	Not Found	Peak Found	Peak Found	High	Not Found	High	17	14.136	1.67
High	Q6W4X9	Mucin-6 OS=Homo sapiens OX=9606 GN=MUC6 PE=1 SV=3	MUC6	ENSG00000283350.1; ENSG00000184956.15	3	2	0.560784	0.000605259	368019	547152	601232	530951	880689	1.08164e+06	897508	1.02499e+06	327029	452053	520858	438933		359281	801645	897508	890690	397983	1	2	1	1		2	2	2	2	2	Peak Found	Peak Found	Peak Found	Peak Found	Not Found	Peak Found	Peak Found	High	Peak Found	Peak Found	1	5.627	0
High	Q15424	Scaffold attachment factor B1 OS=Homo sapiens OX=9606 GN=SAFB PE=1 SV=4	SAFB	ENSG00000160633.12	139	9	0.590843	0.000612364	4.65716e+06	5.16829e+06	4.80285e+06	5.0189e+06	6.71394e+06	8.82614e+06	8.1226e+06	8.50067e+06	4.13844e+06	4.27001e+06	4.16079e+06	4.14908e+06	21057.7	2.73898e+06	6.54139e+06	8.1226e+06	7.3869e+06	1.09873e+06	9	9	9	9	2	9	9	9	9	7	High	High	High	High	Peak Found	High	High	High	High	High	25	82.94	77.2
High	Q9UBU8	Mortality factor 4-like protein 1 OS=Homo sapiens OX=9606 GN=MORF4L1 PE=1 SV=2	MORF4L1	ENSG00000185787.14	18	3	1.47013	0.000618384	2.41771e+06	2.69519e+06	2.86839e+06	2.71413e+06	2.09361e+06	1.71743e+06	1.82707e+06	1.85241e+06	2.14843e+06	2.22674e+06	2.48493e+06	2.24375e+06	22291.4	854099	1.27285e+06	1.82707e+06	1609704	882748	3	3	3	3	1	3	3	3	3	3	High	High	High	High	Peak Found	Peak Found	High	High	High	High	15	20.244	19.27
High	Q53GQ0	Very-long-chain 3-oxoacyl-CoA reductase OS=Homo sapiens OX=9606 GN=HSD17B12 PE=1 SV=2	HSD17B12	ENSG00000149084.12	150	10	1.34404	0.000639931	1.74376e+07	2.07383e+07	1.97896e+07	1.87286e+07	1.49006e+07	1.40654e+07	1.45251e+07	1.41335e+07	1.54954e+07	1.71338e+07	1.71441e+07	1.54828e+07	467451	6.07877e+06	1.04244e+07	1.45251e+07	1.22817e+07	7.98867e+06	9	10	10	10	4	8	8	9	9	8	High	High	High	High	Peak Found	High	High	High	High	High	47	61.28	163.89
High	P49748	Very long-chain specific acyl-CoA dehydrogenase, mitochondrial OS=Homo sapiens OX=9606 GN=ACADVL PE=1 SV=1	ACADVL	ENSG00000072778.19	300	26	1.46942	0.000642403	4.91688e+07	5.72562e+07	6.17557e+07	5.24865e+07	3.76588e+07	3.76345e+07	3.67472e+07	3.70498e+07	4.36924e+07	4.73047e+07	5.35e+07	4.33902e+07	1.37955e+06	1.53631e+07	2.78923e+07	3.67472e+07	3.21955e+07	2.37785e+07	24	24	25	25	17	24	24	24	24	23	High	High	High	High	High	High	High	High	High	High	54	147.341	288.42
High	P26447	Protein S100-A4 OS=Homo sapiens OX=9606 GN=S100A4 PE=1 SV=1	S100A4	ENSG00000196154.11	6	2	0.245831	0.000644061	455195	205486	239988	433865	1.38592e+06	1.63525e+06	1.3552e+06	957036	404495	169771	207906	358673	23950.4	565393	1.21195e+06	1.3552e+06	831644	2.21325e+06	2	1	1	2	1	2	2	2	2	2	Peak Found	Peak Found	Peak Found	Peak Found	Peak Found	Peak Found	High	High	Peak Found	High	16	4.974	7.78
High	P18077	60S ribosomal protein L35a OS=Homo sapiens OX=9606 GN=RPL35A PE=1 SV=2	RPL35A	ENSG00000182899.14	87	3	0.786337	0.000658247	1.74406e+07	1.96677e+07	1.89988e+07	1.81499e+07	2.1759e+07	2.37494e+07	24367358	2.34932e+07	1.5498e+07	1.62493e+07	1.6459e+07	1.50044e+07	434571	8.87668e+06	1.76016e+07	24367358	20415103	1.08865e+07	3	3	3	3	3	3	3	3	3	3	High	High	High	High	High	High	High	High	High	High	25	14.911	56.78
High	P05023	Sodium/potassium-transporting ATPase subunit alpha-1 OS=Homo sapiens OX=9606 GN=ATP1A1 PE=1 SV=1	ATP1A1	ENSG00000163399.15	908	25	1.60108	0.000661689	1.93493e+08	2.27618e+08	2.30478e+08	1.89997e+08	1.1453e+08	1.43791e+08	1.34482e+08	1.28534e+08	1.71942e+08	1.88056e+08	1.99667e+08	1.57069e+08	3.94189e+06	4.67231e+07	1.06569e+08	1.34482e+08	1.11693e+08	7.43305e+07	28	29	28	28	20	28	28	28	29	29	High	High	High	High	High	High	High	High	High	High	46	366.097	963.3
High	Q14651	Plastin-1 OS=Homo sapiens OX=9606 GN=PLS1 PE=1 SV=2	PLS1	ENSG00000120756.12	178	20	0.68744	0.00067455	1.57443e+07	1.75686e+07	1.62515e+07	1.66574e+07	2.49313e+07	2.0467e+07	2.40632e+07	2.38084e+07	1.39907e+07	1.4515e+07	1.40789e+07	1.37706e+07	1.93998e+06	1.01708e+07	1.51689e+07	2.40632e+07	2.0689e+07	1.38049e+07	20	20	19	21	7	19	19	21	20	20	High	High	High	High	Peak Found	High	High	High	High	High	47	119.645	103.59
High	O43920	NADH dehydrogenase [ubiquinone] iron-sulfur protein 5 OS=Homo sapiens OX=9606 GN=NDUFS5 PE=1 SV=3	NDUFS5	ENSG00000168653.10	15	3	2.82666	0.000684611	1.97001e+06	2.29239e+06	2.08448e+06	1.96894e+06	423564	1.11339e+06	1.01081e+06	343476	1750586	1.89395e+06	1.80582e+06	1.62771e+06	37022.7	172795	825176	1.01081e+06	298473	138561	3	3	3	3	1	1	2	2	1	1	High	High	High	High	Peak Found	Peak Found	Peak Found	High	High	Peak Found	32	11.374	7.59
High	P12955	Xaa-Pro dipeptidase OS=Homo sapiens OX=9606 GN=PEPD PE=1 SV=3	PEPD	ENSG00000124299.13	101	14	1.2319	0.000699429	1.08314e+07	1.16472e+07	1.15001e+07	1.1366e+07	9.17338e+06	9.26736e+06	1.01652e+07	9.29422e+06	9.62504e+06	9.62285e+06	9.96275e+06	9.39616e+06	205833	3.74232e+06	6.8684e+06	1.01652e+07	8.07647e+06	4.81466e+06	15	15	15	15	5	14	14	15	15	14	High	High	High	High	Peak Found	High	High	High	High	High	46	73.676	68.24
High	O43395	U4/U6 small nuclear ribonucleoprotein Prp3 OS=Homo sapiens OX=9606 GN=PRPF3 PE=1 SV=2	PRPF3	ENSG00000117360.12	28	7	0.556684	0.000699699	3.18355e+06	3.30662e+06	3.43388e+06	3.16629e+06	4.51362e+06	5.68752e+06	6.00476e+06	5.9711e+06	2.82897e+06	2.73191e+06	2.97483e+06	2.61755e+06	53631.9	1.84135e+06	4.21524e+06	6.00476e+06	5.18876e+06	2.64251e+06	7	7	7	7	3	6	6	7	7	6	High	High	High	High	Peak Found	High	High	High	High	High	15	19.408	0
High	Q9BX66	Sorbin and SH3 domain-containing protein 1 OS=Homo sapiens OX=9606 GN=SORBS1 PE=1 SV=3	SORBS1	ENSG00000095637.21	5	2	2.14961	0.000703878	797415	650918	829206	896864	498973	371870	352479	384837	708599	537783	718356	741430		203558	275607	352479	334415		2	2	2	2		2	2	2	2		High	High	Peak Found	High	Not Found	Peak Found	Peak Found	Peak Found	Peak Found	Not Found	2	7.256	2.1
High	P03905	NADH-ubiquinone oxidoreductase chain 4 OS=Homo sapiens OX=9606 GN=MT-ND4 PE=1 SV=1	ND4	ENSG00000198886.2	17	3	1.50656	0.000708983	1.74671e+06	2.07452e+06	2.10115e+06	1.84275e+06	1.44708e+06	1.3118e+06	1.28834e+06	1.24983e+06	1.55216e+06	1.71395e+06	1.82026e+06	1.52339e+06		590342	972227	1.28834e+06	1.08607e+06	745063	3	3	3	3		3	3	3	3	3	High	High	High	High	Not Found	High	Peak Found	Peak Found	High	High	8	12.059	4.16
High	Q71UI9	Histone H2A.V OS=Homo sapiens OX=9606 GN=H2AZ2 PE=1 SV=3	H2AFV	ENSG00000105968.18	504	3	0.694628	0.000716312	1.92079e+07	1.98219e+07	2.19876e+07	2.31009e+07	2.77474e+07	3.02479e+07	2.99419e+07	3.33033e+07	1.70685e+07	1.63767e+07	1.90482e+07	1.90973e+07	856948	1.13197e+07	2.24179e+07	2.99419e+07	2.89398e+07	1.41118e+07	3	3	3	3	3	3	3	3	3	3	High	High	High	High	High	High	High	High	High	High	54	45.704	421.26
High	P49770	Translation initiation factor eIF-2B subunit beta OS=Homo sapiens OX=9606 GN=EIF2B2 PE=1 SV=3	EIF2B2	ENSG00000119718.10	22	4	2.46888	0.000718849	2.42283e+06	3.51201e+06	3.16124e+06	2.98755e+06	883681	1.16762e+06	1.32289e+06	1.65289e+06	2.15298e+06	2.9016e+06	2.73864e+06	2.46978e+06	52044.2	360501	865371	1.32289e+06	1.43633e+06	911699	4	4	4	4	2	3	3	3	4	4	High	High	High	High	Peak Found	Peak Found	High	High	High	High	15	16.898	7.34
High	Q08380	Galectin-3-binding protein OS=Homo sapiens OX=9606 GN=LGALS3BP PE=1 SV=1	LGALS3BP	ENSG00000108679.12	195	15	1.29523	0.000734689	4.2726e+07	4.77776e+07	4.69665e+07	4.51897e+07	3.10779e+07	3.65151e+07	3.67892e+07	3.46356e+07	3.79672e+07	3.94735e+07	4.06879e+07	3.7358e+07	457284	1.26783e+07	2.70628e+07	3.67892e+07	3.00975e+07	1.51667e+07	16	16	16	16	6	14	14	14	15	13	High	High	High	High	Peak Found	High	High	High	High	High	39	103.853	224.24
High	Q14203	Dynactin subunit 1 OS=Homo sapiens OX=9606 GN=DCTN1 PE=1 SV=3	DCTN1	ENSG00000204843.12	71	14	0.761173	0.000739015	4.53412e+06	4.75314e+06	4.82653e+06	4.70328e+06	6.52691e+06	5.76234e+06	6.71182e+06	5.89658e+06	4.02911e+06	3.92701e+06	4.1813e+06	3.88817e+06		2.66268e+06	4.27069e+06	6.71182e+06	5.124e+06	3.67196e+06	12	11	11	12		13	12	13	12	13	High	High	High	High	Not Found	High	High	High	High	High	16	54.146	21.67
High	Q99536	Synaptic vesicle membrane protein VAT-1 homolog OS=Homo sapiens OX=9606 GN=VAT1 PE=1 SV=2	VAT1	ENSG00000108828.15	53	6	1.35853	0.00074648	4.51201e+06	4.47356e+06	4.91408e+06	4.56154e+06	2.92899e+06	3.30206e+06	3.7786e+06	3.3769e+06	4.00946e+06	3.69603e+06	4.25715e+06	3770987		1.19489e+06	2.44728e+06	3.7786e+06	2.93445e+06	2.04324e+06	6	6	6	6		6	6	6	6	4	High	High	High	High	Not Found	High	High	High	High	High	30	34.7	52.89
High	Q9BQG0	Myb-binding protein 1A OS=Homo sapiens OX=9606 GN=MYBBP1A PE=1 SV=2	MYBBP1A	ENSG00000132382.14	180	28	0.665963	0.000747648	1.08948e+07	1.22461e+07	1.2181e+07	1.30337e+07	2.09588e+07	1.68316e+07	1.74115e+07	1.92679e+07	9.68135e+06	1.01176e+07	1.05526e+07	1.07748e+07	137533	8.55023e+06	1.24746e+07	1.74115e+07	1.67434e+07	1.17254e+07	22	23	23	24	5	25	23	25	25	25	High	High	High	High	Peak Found	High	High	High	High	High	28	136.973	118.66
High	Q00266	S-adenosylmethionine synthase isoform type-1 OS=Homo sapiens OX=9606 GN=MAT1A PE=1 SV=2	MAT1A	ENSG00000151224.12	65	2	4.66183	0.000752185	638637	754065	690058	578632			131541	153474	567506	623003	597809	478351				131541	133366	67828.9	2	2	2	2				1	1	1	High	High	High	Peak Found	Not Found	Not Found	Not Found	Peak Found	Peak Found	Peak Found	15	18.559	58.34
High	O95299	NADH dehydrogenase [ubiquinone] 1 alpha subcomplex subunit 10, mitochondrial OS=Homo sapiens OX=9606 GN=NDUFA10 PE=1 SV=1	NDUFA10	ENSG00000281434.2; ENSG00000130414.11	33	7	1.63511	0.000772704	6.23541e+06	7.61824e+06	6.95214e+06	6.4547e+06	3.82768e+06	3.67931e+06	4.92485e+06	4.37165e+06	5.54091e+06	6.29414e+06	6.02276e+06	5.33605e+06	109994	1.56152e+06	2.72688e+06	4.92485e+06	3.79887e+06	1.67506e+06	7	7	7	7	3	4	6	6	5	4	High	High	High	High	Peak Found	High	High	High	High	High	29	33.465	49.31
High	P63244	Receptor of activated protein C kinase 1 OS=Homo sapiens OX=9606 GN=RACK1 PE=1 SV=3	GNB2L1; RACK1	ENSG00000204628.11	595	18	0.839983	0.000777154	1.13538e+08	1.23878e+08	1.23138e+08	1.24663e+08	1.37743e+08	1.44776e+08	1.50385e+08	1.49296e+08	1.00892e+08	1.02347e+08	1.06676e+08	1.03058e+08	2.56344e+06	5.61926e+07	1.07299e+08	1.50385e+08	1.29735e+08	7.92118e+07	22	23	22	23	13	23	22	24	24	23	High	High	High	High	High	High	High	High	High	High	78	154.766	737.07
High	Q12797	Aspartyl/asparaginyl beta-hydroxylase OS=Homo sapiens OX=9606 GN=ASPH PE=1 SV=3	ASPH	ENSG00000198363.17	59	10	0.748275	0.000790705	4.40172e+06	5.04611e+06	5.02142e+06	4.4295e+06	6.98546e+06	6.28046e+06	6.02928e+06	6.34982e+06	3.91146e+06	4.16906e+06	4.35014e+06	3.66183e+06	77392.5	2.84975e+06	4.65469e+06	6.02928e+06	5.51785e+06	3.96493e+06	9	9	10	9	2	10	9	10	10	10	High	High	High	High	Peak Found	High	High	High	High	High	25	53.171	70.4
High	P23921	Ribonucleoside-diphosphate reductase large subunit OS=Homo sapiens OX=9606 GN=RRM1 PE=1 SV=1	RRM1	ENSG00000167325.14	166	18	0.734127	0.000808376	1.38745e+07	1.52389e+07	1.39157e+07	1.48932e+07	2.16401e+07	1.79181e+07	1.9855e+07	1.93874e+07	1.23291e+07	1.25903e+07	1.20555e+07	1.23121e+07	302942	8.82816e+06	1.32798e+07	1.9855e+07	1.68473e+07	1.20032e+07	18	18	17	18	9	18	18	19	18	18	High	High	High	High	Peak Found	High	High	High	High	High	36	96.635	142.73
High	P17174	Aspartate aminotransferase, cytoplasmic OS=Homo sapiens OX=9606 GN=GOT1 PE=1 SV=3	GOT1	ENSG00000120053.10	269	20	1.32615	0.000808828	6.22445e+07	7.26567e+07	7.06029e+07	6.51659e+07	5.1132e+07	5.12463e+07	5.43273e+07	4.97725e+07	5.53117e+07	6.00284e+07	6.11646e+07	5.38721e+07	1.77301e+06	2.08595e+07	3.79806e+07	5.43273e+07	4.32512e+07	3.02477e+07	21	22	22	21	15	21	20	21	21	21	High	High	High	High	High	High	High	High	High	High	66	139.116	232.96
High	P40925	Malate dehydrogenase, cytoplasmic OS=Homo sapiens OX=9606 GN=MDH1 PE=1 SV=4	MDH1	ENSG00000014641.17	286	11	1.48354	0.000838732	9.50518e+07	1.12214e+08	1.08015e+08	9.66889e+07	5.29571e+07	7.16249e+07	7.10885e+07	6.68952e+07	8.44649e+07	9.27099e+07	9.35754e+07	7.9932e+07	2.31594e+06	2.16041e+07	5.3084e+07	7.10885e+07	5.81305e+07	3.28285e+07	17	17	16	16	9	14	14	17	16	15	High	High	High	High	High	High	High	High	High	High	51	91.094	258.8
High	Q06323	Proteasome activator complex subunit 1 OS=Homo sapiens OX=9606 GN=PSME1 PE=1 SV=1	PSME1	ENSG00000092010.14	304	12	1.35704	0.000841066	5.00787e+07	5.83278e+07	5.91924e+07	5.80333e+07	4.37851e+07	4.36327e+07	4.05481e+07	4.21137e+07	4.45009e+07	4.819e+07	5.12794e+07	4.79757e+07	1.40344e+06	1.78623e+07	3.23379e+07	4.05481e+07	3.65959e+07	1.87002e+07	13	13	13	13	11	13	13	13	13	13	High	High	High	High	High	High	High	High	High	High	57	76.354	362.39
High	P22033	Methylmalonyl-CoA mutase, mitochondrial OS=Homo sapiens OX=9606 GN=MMUT PE=1 SV=4	MUT	ENSG00000146085.7	91	13	1.20667	0.000843647	1.18747e+07	1.32182e+07	1.29383e+07	1.1874e+07	1.03347e+07	9.80751e+06	1.02377e+07	1.03256e+07	1.05521e+07	1.09208e+07	1.12087e+07	9.81614e+06	287906	4.21609e+06	7.26872e+06	1.02377e+07	8.9727e+06	5.79402e+06	12	12	12	12	7	12	12	12	12	12	High	High	High	High	Peak Found	High	High	High	High	High	29	67.256	54.31
High	P48163	NADP-dependent malic enzyme OS=Homo sapiens OX=9606 GN=ME1 PE=1 SV=1	ME1	ENSG00000065833.8	283	22	0.62666	0.000882653	2.34893e+07	2.84825e+07	2.47707e+07	2.70387e+07	4.78258e+07	3.64525e+07	4.12383e+07	4.14372e+07	2.08731e+07	2.3532e+07	2.14593e+07	2.23527e+07	410188	1.95107e+07	27016338	4.12383e+07	3.6008e+07	2.26906e+07	21	25	22	25	9	24	23	23	24	25	High	High	High	High	Peak Found	High	High	High	High	High	60	142.227	267.27
High	P49792	E3 SUMO-protein ligase RanBP2 OS=Homo sapiens OX=9606 GN=RANBP2 PE=1 SV=2	RANBP2	ENSG00000153201.15	257	46	0.750576	0.000897024	1.64231e+07	2.04844e+07	1.90832e+07	1.84001e+07	2.43157e+07	2.62848e+07	2.35772e+07	2.56236e+07	1.45939e+07	1.69241e+07	1.65321e+07	1.52112e+07	73819.7	9.91968e+06	1.94807e+07	2.35772e+07	2.22664e+07	1.28944e+07	41	43	42	41	4	43	45	42	44	42	High	High	High	High	Peak Found	High	High	High	High	High	22	202.961	147.85
High	P57105	Synaptojanin-2-binding protein OS=Homo sapiens OX=9606 GN=SYNJ2BP PE=1 SV=2	SYNJ2BP	ENSG00000213463.4	28	4	1.3191	0.000907129	2.27058e+06	2.53335e+06	2.68607e+06	2.32244e+06	1.82724e+06	1.90185e+06	1.72672e+06	1.85391e+06	2.01769e+06	2.09303e+06	2.32699e+06	1.91994e+06		745428	1.40953e+06	1.72672e+06	1.61101e+06	1.13424e+06	4	4	4	4		4	4	4	4	4	High	High	High	High	Not Found	High	High	High	High	High	44	23.708	19.01
High	Q13283	Ras GTPase-activating protein-binding protein 1 OS=Homo sapiens OX=9606 GN=G3BP1 PE=1 SV=1	G3BP1	ENSG00000145907.14	336	14	0.832124	0.000915357	2.67126e+07	2.88696e+07	3.06221e+07	3.05536e+07	3.49881e+07	3.46195e+07	3.64233e+07	3.705e+07	2.37373e+07	2.38518e+07	2.65284e+07	2.52584e+07	811534	1.42735e+07	2.56578e+07	3.64233e+07	3.21956e+07	9.04802e+06	14	14	13	14	7	14	13	14	14	12	High	High	High	High	High	High	High	High	High	High	50	99.812	290.77
High	Q8NE62	Choline dehydrogenase, mitochondrial OS=Homo sapiens OX=9606 GN=CHDH PE=1 SV=2	CHDH	ENSG00000016391.10	6	3	1.85067	0.000922038	730675	773117	784141	658964	286219	481812	339389	473176	649292	638743	679315	544761		116764	357089	339389	411180	249300	3	3	3	3		1	3	2	3	2	Peak Found	High	High	High	Not Found	Peak Found	Peak Found	High	Peak Found	Peak Found	5	7.811	0
High	Q5BKZ1	DBIRD complex subunit ZNF326 OS=Homo sapiens OX=9606 GN=ZNF326 PE=1 SV=2	ZNF326	ENSG00000162664.16	31	6	1.30155	0.000937263	2.45152e+06	2.72865e+06	2.60411e+06	2.55241e+06	1.80197e+06	2.17799e+06	2042327	1.91952e+06	2.17847e+06	2.25439e+06	2.25599e+06	2.11006e+06		735123	1.61419e+06	2042327	1.66802e+06	166755	6	6	6	6		6	6	6	6	1	High	High	High	High	Not Found	High	High	High	High	Peak Found	15	18.542	1.62
High	O15258	Protein RER1 OS=Homo sapiens OX=9606 GN=RER1 PE=1 SV=1	RER1	ENSG00000157916.19	26	5	0.569277	0.000962806	2.64892e+06	2.98845e+06	3.12209e+06	2.59549e+06	3.87802e+06	5.10378e+06	4.85345e+06	5.04922e+06	2.35388e+06	2.46903e+06	2.70472e+06	2.14568e+06	31961	1.58205e+06	3.7826e+06	4.85345e+06	4.38766e+06	2459248	5	5	5	4	2	5	5	5	5	5	High	High	High	Peak Found	Peak Found	High	High	High	High	High	34	18.677	7.97
High	P46777	60S ribosomal protein L5 OS=Homo sapiens OX=9606 GN=RPL5 PE=1 SV=3	RPL5	ENSG00000122406.12	292	12	0.805293	0.000993561	5.34545e+07	6.18448e+07	5.71974e+07	5.95752e+07	6.82092e+07	7.12262e+07	7.37802e+07	7.51966e+07	4.75008e+07	5.10957e+07	4.95511e+07	4.92503e+07	1.53553e+06	2.78262e+07	5.27885e+07	7.37802e+07	6.53442e+07	3.52347e+07	15	16	15	16	9	15	16	16	16	16	High	High	High	High	High	High	High	High	High	High	51	115.171	220.28
High	P13987	CD59 glycoprotein OS=Homo sapiens OX=9606 GN=CD59 PE=1 SV=1	CD59	ENSG00000085063.14	9	2	1.45503	0.000999306	3.26017e+06	3.77324e+06	3.75354e+06	3.37236e+06	2.18513e+06	2.77445e+06	2.51885e+06	2.37855e+06	2.89705e+06	3117420	3.25176e+06	2.7879e+06	25540	891434	2.05625e+06	2.51885e+06	2.06691e+06	1.53871e+06	2	2	2	2	1	2	2	2	2	2	High	Peak Found	High	High	Peak Found	High	Peak Found	High	High	High	16	4.945	0
High	Q08257	Quinone oxidoreductase OS=Homo sapiens OX=9606 GN=CRYZ PE=1 SV=1	CRYZ	ENSG00000116791.13	133	12	1.3792	0.00100622	2.2799e+07	2.70721e+07	2.55282e+07	2.33953e+07	1.66927e+07	1.87798e+07	1.88006e+07	1.63733e+07	2.02596e+07	2.23668e+07	2.21155e+07	1.93407e+07	671828	6.80984e+06	1.39184e+07	1.88006e+07	1.42281e+07	9.6193e+06	13	13	13	12	11	13	13	13	12	13	High	High	High	High	High	High	High	High	High	High	57	84.086	146.31
High	O00767	Acyl-CoA desaturase OS=Homo sapiens OX=9606 GN=SCD PE=1 SV=2	SCD	ENSG00000099194.5	103	7	0.773291	0.00101771	1.32153e+07	1.54909e+07	1.60992e+07	1.41563e+07	1.96287e+07	1.87433e+07	1.95958e+07	1.82984e+07	1.17433e+07	1.27985e+07	1.3947e+07	1.17029e+07	447832	8.00759e+06	1.38914e+07	1.95958e+07	1.59009e+07	1.04006e+07	8	8	8	8	4	8	8	8	8	8	High	High	High	High	Peak Found	High	High	High	High	High	30	37.377	66.7
High	P16219	Short-chain specific acyl-CoA dehydrogenase, mitochondrial OS=Homo sapiens OX=9606 GN=ACADS PE=1 SV=1	ACADS	ENSG00000122971.8	16	4	1.67078	0.00102777	2.30914e+06	2.74323e+06	2.90518e+06	2.44201e+06	1.81274e+06	1.24862e+06	1.55094e+06	1.55254e+06	2.05195e+06	2.26644e+06	2.5168e+06	2.01879e+06	41751.7	739516	925403	1.55094e+06	1.34913e+06	635160	4	4	4	4	2	4	3	4	4	3	High	High	High	High	Peak Found	High	Peak Found	High	High	High	14	16.147	1.8
High	P05026	Sodium/potassium-transporting ATPase subunit beta-1 OS=Homo sapiens OX=9606 GN=ATP1B1 PE=1 SV=1	ATP1B1	ENSG00000143153.12	196	10	1.4415	0.00103543	6.64253e+07	7.43193e+07	8.02763e+07	6.38382e+07	4.8077e+07	4.97505e+07	4.95608e+07	4.52629e+07	5.90269e+07	6.1402e+07	6.95448e+07	5.27746e+07	1.34333e+06	1.96132e+07	3.6872e+07	4.95608e+07	3.93324e+07	2.557e+07	11	11	11	11	9	11	11	11	11	11	High	High	High	High	High	High	High	High	High	High	40	81.418	252.91
High	P50454	Serpin H1 OS=Homo sapiens OX=9606 GN=SERPINH1 PE=1 SV=2	SERPINH1	ENSG00000149257.13	119	12	0.802118	0.00103994	1.06933e+07	1.24006e+07	1.16037e+07	1.17265e+07	1.57254e+07	1.48586e+07	1.39894e+07	1.42272e+07	9.50226e+06	1.02453e+07	1.00525e+07	9.69425e+06	230061	6.41523e+06	11012286	1.39894e+07	1.23631e+07	5.28764e+06	11	11	11	11	5	11	11	11	11	10	High	High	High	High	Peak Found	High	High	High	High	High	38	72.591	119.41
High	P08238	Heat shock protein HSP 90-beta OS=Homo sapiens OX=9606 GN=HSP90AB1 PE=1 SV=4	HSP90AB1	ENSG00000096384.19	2970	20	0.835157	0.00105067	3.45214e+08	4.00045e+08	4.00397e+08	3.83807e+08	4.59429e+08	4.57219e+08	4.79139e+08	4.8818e+08	3.06764e+08	3.30514e+08	3.46871e+08	3.1729e+08	8.37667e+06	1.87426e+08	3.38863e+08	4.79139e+08	4.24217e+08	2.6726e+08	30	30	31	31	21	30	29	29	32	31	High	High	High	High	High	High	High	High	High	High	61	489.736	4394.04
High	Q16698	2,4-dienoyl-CoA reductase, mitochondrial OS=Homo sapiens OX=9606 GN=DECR1 PE=1 SV=1	DECR1	ENSG00000104325.6	119	13	1.28015	0.0010846	2.85725e+07	3.12961e+07	3.1514e+07	3.0486e+07	2.03786e+07	2.45864e+07	2.47189e+07	2.3675e+07	2.53901e+07	2.58566e+07	27301112	2.52026e+07	465832	8.31354e+06	1.8222e+07	2.47189e+07	2.0573e+07	1.13197e+07	11	11	12	11	6	10	10	11	11	9	High	High	High	High	Peak Found	High	High	High	High	High	51	59.271	120.54
High	Q9BRQ8	Ferroptosis suppressor protein 1 OS=Homo sapiens OX=9606 GN=AIFM2 PE=1 SV=1	AIFM2	ENSG00000042286.14	37	9	0.708999	0.00111173	4.16879e+06	5.48783e+06	5.03729e+06	4.63749e+06	6.30634e+06	6.75453e+06	7.15986e+06	6.89117e+06	3.70447e+06	4.534e+06	4.36389e+06	3.83378e+06	19681.3	2.5727e+06	5.00604e+06	7.15986e+06	5.98828e+06	4.74123e+06	7	7	7	7	1	7	7	7	7	8	High	High	High	High	Peak Found	High	High	High	High	High	33	33.084	22.86
High	Q15428	Splicing factor 3A subunit 2 OS=Homo sapiens OX=9606 GN=SF3A2 PE=1 SV=2	SF3A2	ENSG00000104897.9	58	5	1.32497	0.0011169	5.20339e+06	5.54971e+06	5.57311e+06	5.16864e+06	4.37771e+06	3.36691e+06	4.13689e+06	3.97882e+06	4.62384e+06	4.58513e+06	4.82808e+06	4.27288e+06	63523.2	1.7859e+06	2.49534e+06	4.13689e+06	3.45751e+06	2.0469e+06	5	5	5	5	2	4	4	4	4	4	High	High	High	High	Peak Found	High	High	High	High	High	18	25.617	63.52
High	P14625	Endoplasmin OS=Homo sapiens OX=9606 GN=HSP90B1 PE=1 SV=1	HSP90B1	ENSG00000166598.14	831	34	0.832168	0.00112379	1.95774e+08	2.27264e+08	2.18545e+08	2.20009e+08	2.49887e+08	2.65737e+08	2.65604e+08	2.61398e+08	1.73969e+08	1.87764e+08	1.89329e+08	1.8188e+08	3.98557e+06	1.01942e+08	1.96948e+08	2.65604e+08	2.27149e+08	1.19123e+08	41	41	40	41	28	41	41	41	40	41	High	High	High	High	High	High	High	High	High	High	57	270.957	1144.84
High	O95154	Aflatoxin B1 aldehyde reductase member 3 OS=Homo sapiens OX=9606 GN=AKR7A3 PE=1 SV=2	AKR7A3	ENSG00000162482.4	58	4	1.54095	0.00113553	4.79046e+06	5.49387e+06	5.74788e+06	4.52127e+06	3.39006e+06	3.28394e+06	3.62496e+06	3.16419e+06	4.2569e+06	4.53899e+06	4.97949e+06	3.7377e+06	162565	1.38299e+06	2.43386e+06	3.62496e+06	2.74961e+06	1.87591e+06	3	3	3	3	3	3	3	3	3	3	High	High	High	High	Peak Found	High	High	High	High	High	31	51.678	64.85
High	P35221	Catenin alpha-1 OS=Homo sapiens OX=9606 GN=CTNNA1 PE=1 SV=1	CTNNA1	ENSG00000044115.20	167	19	0.633725	0.00113755	1.25189e+07	1.59176e+07	1.44861e+07	1.25137e+07	2.34201e+07	1.94043e+07	1.99534e+07	2.26598e+07	1.11246e+07	1.3151e+07	1.25496e+07	1.0345e+07	77506.8	9.55433e+06	1.43812e+07	1.99534e+07	1.96909e+07	1.38246e+07	17	18	16	15	3	19	18	18	20	19	High	High	High	High	Peak Found	High	High	High	High	High	45	141.281	122.56
High	P62753	40S ribosomal protein S6 OS=Homo sapiens OX=9606 GN=RPS6 PE=1 SV=1	RPS6	ENSG00000137154.12	234	11	0.830971	0.00114458	7.68712e+07	8.77044e+07	7.90581e+07	8.53447e+07	1.04725e+08	9.86944e+07	9.71491e+07	9.91499e+07	6.83093e+07	7.24607e+07	6.84894e+07	7.05538e+07	1.45234e+06	4.27232e+07	7.31462e+07	9.71491e+07	8.61591e+07	3.16307e+07	12	12	12	12	10	12	12	12	12	12	High	High	High	High	High	High	High	High	High	High	39	63.434	324.73
High	Q99986	Serine/threonine-protein kinase VRK1 OS=Homo sapiens OX=9606 GN=VRK1 PE=1 SV=1	VRK1	ENSG00000100749.7	28	7	1.48195	0.00114986	4.98542e+06	4.37859e+06	5.12324e+06	4.8778e+06	3.45862e+06	3.89926e+06	3.03414e+06	3.19697e+06	4.43014e+06	3.61756e+06	4.43835e+06	4.03244e+06	99022.2	1.41096e+06	2.88989e+06	3.03414e+06	2.77809e+06	2.16601e+06	8	7	7	8	3	7	8	5	6	7	High	High	High	High	Peak Found	High	High	High	High	High	23	27.004	6.77
High	P05161	Ubiquitin-like protein ISG15 OS=Homo sapiens OX=9606 GN=ISG15 PE=1 SV=5	ISG15	ENSG00000187608.8	77	5	1.52023	0.00115216	1.24901e+07	1.35324e+07	1.53575e+07	1.22245e+07	8.6345e+06	9.82681e+06	8.4829e+06	8.20327e+06	1.10989e+07	1.11804e+07	1.33045e+07	1.01059e+07	464340	3.52248e+06	7.28303e+06	8.4829e+06	7.12846e+06	6.68948e+06	5	5	5	5	5	5	5	5	5	5	High	High	High	High	High	High	High	High	High	High	37	33.041	75.14
High	P23526	Adenosylhomocysteinase OS=Homo sapiens OX=9606 GN=AHCY PE=1 SV=4	AHCY	ENSG00000101444.12	356	19	0.846113	0.00115737	6.67356e+07	7.4747e+07	7.36807e+07	7.74007e+07	8.94205e+07	8.60027e+07	8.57861e+07	9.00183e+07	5.93026e+07	6.17554e+07	6.38309e+07	6.39865e+07	1.84377e+06	3.64794e+07	6.37399e+07	8.57861e+07	7.82239e+07	5.52291e+07	20	21	20	21	15	21	21	21	22	22	High	High	High	High	Peak Found	High	High	High	High	High	54	126.836	346.18
High	P48449	Lanosterol synthase OS=Homo sapiens OX=9606 GN=LSS PE=1 SV=1	LSS	ENSG00000160285.14	163	20	1.34021	0.00116803	2.16636e+07	2.52019e+07	2.58608e+07	2.54886e+07	1.87849e+07	1.90378e+07	1.80626e+07	1.91352e+07	1.92507e+07	2.08216e+07	2.24036e+07	2.10712e+07	426544	7.66339e+06	1.41097e+07	1.80626e+07	1.66281e+07	1.03525e+07	19	19	19	19	12	18	17	17	18	18	High	High	High	High	Peak Found	High	High	High	High	High	33	75.748	103.92
High	P34896	Serine hydroxymethyltransferase, cytosolic OS=Homo sapiens OX=9606 GN=SHMT1 PE=1 SV=1	SHMT1	ENSG00000176974.19	179	17	0.871574	0.0011809	1.81193e+07	2.01954e+07	1.96442e+07	1.97019e+07	2.18247e+07	2.29087e+07	2.3085e+07	2.2235e+07	1.61012e+07	1.66853e+07	1.70181e+07	1.62874e+07	285098	8.90348e+06	1.69785e+07	2.3085e+07	1.93218e+07	1.32046e+07	14	14	15	15	6	15	14	15	16	14	High	High	High	High	Peak Found	High	High	High	High	High	52	90.298	155.04
High	Q9Y4P3	Transducin beta-like protein 2 OS=Homo sapiens OX=9606 GN=TBL2 PE=1 SV=1	TBL2	ENSG00000106638.15	27	6	0.729989	0.00120511	1.98873e+06	2.13296e+06	2.2758e+06	2.08773e+06	2.5082e+06	2.85017e+06	2.93168e+06	2.9644e+06	1.76723e+06	1.76223e+06	1.97157e+06	1.72591e+06	24037.2	1.02323e+06	2.11237e+06	2.93168e+06	2.576e+06	1.64221e+06	6	6	6	6	1	6	6	6	6	6	Peak Found	High	High	High	Peak Found	High	High	High	High	High	19	19.748	5.05
High	O75534	Cold shock domain-containing protein E1 OS=Homo sapiens OX=9606 GN=CSDE1 PE=1 SV=2	CSDE1	ENSG00000009307.15	176	26	0.740615	0.00121799	2.25538e+07	2.47264e+07	2.55248e+07	2.24366e+07	2.83411e+07	3.3319e+07	3.20552e+07	3.17839e+07	2.00418e+07	2.04287e+07	2.21126e+07	1.85482e+07	334222	1.15619e+07	2.4694e+07	3.20552e+07	2.76195e+07	1.22495e+07	24	25	25	24	10	26	27	27	25	24	High	High	High	High	Peak Found	High	High	High	High	High	39	113.243	110.56
High	P22309	UDP-glucuronosyltransferase 1-1 OS=Homo sapiens OX=9606 GN=UGT1A1 PE=1 SV=1	UGT1A1	ENSG00000241635.7	152	5	0.456667	0.00122252	4.35166e+06	6.60557e+06	5.55628e+06	6.22834e+06	1.34005e+07	1.10875e+07	1.24052e+07	1.6987e+07	3.86697e+06	5.45747e+06	4.8135e+06	5.14892e+06	87401.4	5.4668e+06	8.21734e+06	1.24052e+07	14761319	8.99734e+06	4	5	4	5	3	5	5	5	6	6	High	High	High	High	Peak Found	High	High	High	High	High	34	98.873	164.53
High	Q96AG4	Leucine-rich repeat-containing protein 59 OS=Homo sapiens OX=9606 GN=LRRC59 PE=1 SV=1	LRRC59	ENSG00000108829.9	203	10	0.833889	0.00125814	3.9285e+07	4.0768e+07	4.35182e+07	3.90913e+07	4.84745e+07	4.92754e+07	4.59186e+07	4.75251e+07	3.49095e+07	3.36822e+07	3.77006e+07	3.23165e+07	1.29557e+06	1.97754e+07	3.65199e+07	4.59186e+07	4.12983e+07	2.8036e+07	10	10	10	10	9	10	10	10	10	10	High	High	High	High	High	High	High	High	High	High	42	62.457	265.85
High	Q96JM3	Chromosome alignment-maintaining phosphoprotein 1 OS=Homo sapiens OX=9606 GN=CHAMP1 PE=1 SV=2	CHAMP1	ENSG00000198824.5	3	2	1.72521	0.00126512	7.96556e+06	9.93056e+06	1.04188e+07	1.01655e+07	5.21965e+06	6.5522e+06	6.36394e+06	5.28455e+06	7.07835e+06	8.20455e+06	9.02598e+06	8.40373e+06	20491.8	2.12938e+06	4.85609e+06	6.36394e+06	4.59216e+06	2.92507e+06	2	2	2	2	1	2	2	2	2	2	High	Peak Found	Peak Found	Peak Found	Peak Found	Peak Found	High	Peak Found	High	Peak Found	2	4.377	0
High	Q9C0C9	(E3-independent) E2 ubiquitin-conjugating enzyme OS=Homo sapiens OX=9606 GN=UBE2O PE=1 SV=3	UBE2O	ENSG00000175931.12	43	9	0.71186	0.0013152	3.00884e+06	3.28388e+06	3.23574e+06	3.18421e+06	5.42093e+06	4.47945e+06	4.53912e+06	4.24873e+06	2.67372e+06	2.71312e+06	2.80318e+06	2.63236e+06	11343.2	2.21149e+06	3.31989e+06	4.53912e+06	3.69205e+06	2.39792e+06	9	9	9	9	1	9	9	9	9	9	High	High	High	High	Peak Found	High	High	High	High	High	11	32.983	7.82
High	P60033	CD81 antigen OS=Homo sapiens OX=9606 GN=CD81 PE=1 SV=1	CD81	ENSG00000110651.11	62	4	1.29783	0.0013174	9.13982e+06	9.76299e+06	9.78623e+06	9.02435e+06	8.27077e+06	7.10714e+06	7.45782e+06	7.04391e+06	8.12183e+06	8.06611e+06	8.47798e+06	7.46036e+06	172915	3.3741e+06	5.26737e+06	7.45782e+06	6.121e+06	4.05322e+06	4	4	4	4	3	4	4	4	4	4	High	High	High	High	Peak Found	High	High	High	High	High	28	26.324	114.59
High	Q96G23	Ceramide synthase 2 OS=Homo sapiens OX=9606 GN=CERS2 PE=1 SV=1	CERS2	ENSG00000143418.19	38	4	0.800229	0.00132422	4.06924e+06	4.81248e+06	4.43969e+06	4.28053e+06	5.30843e+06	5.58873e+06	5.75398e+06	5.2979e+06	3.61601e+06	3.97604e+06	3.84618e+06	3.53868e+06	92514.1	2.1656e+06	4.14202e+06	5.75398e+06	4.60376e+06	3.12901e+06	3	3	3	3	2	3	3	3	3	3	High	High	High	High	Peak Found	High	High	High	High	High	14	16.038	45.75
High	P48147	Prolyl endopeptidase OS=Homo sapiens OX=9606 GN=PREP PE=1 SV=2	PREP	ENSG00000085377.13	114	18	0.825981	0.00133145	8.95269e+06	1.01785e+07	9.40987e+06	9.24359e+06	1.14003e+07	1.0848e+07	1.11831e+07	1.18121e+07	7.95554e+06	8.40938e+06	8.15193e+06	7.6416e+06	42084.2	4.65078e+06	8.03988e+06	1.11831e+07	1.02644e+07	6.45377e+06	18	19	17	19	2	18	18	19	19	19	High	High	High	High	Peak Found	High	High	High	High	High	41	104.419	66.05
High	Q8NC51	Plasminogen activator inhibitor 1 RNA-binding protein OS=Homo sapiens OX=9606 GN=SERBP1 PE=1 SV=2	SERBP1	ENSG00000142864.14	232	15	0.876326	0.00133268	5.59552e+07	6.22548e+07	6.04997e+07	6.00205e+07	6.85379e+07	7.28717e+07	6.77953e+07	6.89911e+07	4.97229e+07	5.14344e+07	5.24119e+07	4.96185e+07	381432	2.79603e+07	5.4008e+07	6.77953e+07	5.99517e+07	1.04259e+07	16	16	16	16	7	16	16	16	16	16	High	High	High	High	High	High	High	High	High	High	45	94.72	188.27
High	Q9BV20	Methylthioribose-1-phosphate isomerase OS=Homo sapiens OX=9606 GN=MRI1 PE=1 SV=1	MRI1	ENSG00000037757.13	51	8	0.808272	0.00133773	3.75203e+06	4.2526e+06	4.40791e+06	4.17861e+06	5.32832e+06	5.10283e+06	4.87145e+06	5.36321e+06	3.33413e+06	3.51346e+06	3.81865e+06	3.45442e+06	115284	2173711	3.7819e+06	4.87145e+06	4.66051e+06	3.11963e+06	7	7	7	7	1	7	7	7	7	7	High	High	High	High	Peak Found	High	High	High	High	High	38	32.729	26.1
High	Q16851	UTP--glucose-1-phosphate uridylyltransferase OS=Homo sapiens OX=9606 GN=UGP2 PE=1 SV=5	UGP2	ENSG00000169764.15	47	8	1.228	0.0013458	8.15268e+06	9.45814e+06	8.62489e+06	8.34036e+06	7.08203e+06	6.80841e+06	7.0069e+06	6.44764e+06	7.24463e+06	7.81425e+06	7471889	6.89491e+06	192967	2.88914e+06	5.04597e+06	7.0069e+06	5.60285e+06	3.91445e+06	8	8	7	8	5	7	7	7	7	8	High	High	High	High	Peak Found	High	High	High	High	High	21	41.4	20.84
High	P04040	Catalase OS=Homo sapiens OX=9606 GN=CAT PE=1 SV=3	CAT	ENSG00000121691.4	229	17	1.25699	0.00135606	3.89846e+07	4.1542e+07	3.97788e+07	3.87476e+07	2.90207e+07	3.15036e+07	3.52021e+07	3.11567e+07	3.46425e+07	3.43217e+07	3.4461e+07	32032310	1.01809e+06	1.18391e+07	2.33485e+07	3.52021e+07	2.70745e+07	1.31862e+07	20	21	21	20	14	19	19	20	20	19	High	High	High	High	Peak Found	High	High	High	High	High	45	117.425	172.63
High	Q96RQ3	Methylcrotonoyl-CoA carboxylase subunit alpha, mitochondrial OS=Homo sapiens OX=9606 GN=MCCC1 PE=1 SV=3	MCCC1	ENSG00000078070.12	31	6	1.42643	0.00135776	3.04912e+06	3.7228e+06	3.60344e+06	3.56371e+06	2.75891e+06	2.41807e+06	2.48725e+06	2.53728e+06	2.70951e+06	3.07575e+06	3.12172e+06	2.94609e+06	22687.5	1.12551e+06	1.79213e+06	2.48725e+06	2.20484e+06	1.26667e+06	6	6	6	6	1	6	5	6	6	6	High	High	High	High	Peak Found	High	High	High	High	High	11	23.438	19.3
High	P30876	DNA-directed RNA polymerase II subunit RPB2 OS=Homo sapiens OX=9606 GN=POLR2B PE=1 SV=1	POLR2B	ENSG00000047315.15	53	9	0.888	0.00135816	3.23128e+06	3.50226e+06	3.56789e+06	3.62878e+06	3.96775e+06	3.96128e+06	3994130	4.09359e+06	2.87138e+06	2.89354e+06	3.09093e+06	2.99988e+06		1.61866e+06	2.93586e+06	3994130	3.55724e+06	2.27913e+06	8	8	8	8		8	8	8	8	8	High	High	High	High	Not Found	High	High	High	High	High	11	35.14	10.12
High	P46782	40S ribosomal protein S5 OS=Homo sapiens OX=9606 GN=RPS5 PE=1 SV=4	RPS5	ENSG00000083845.8	198	9	0.858692	0.00139107	7.72303e+07	8.5828e+07	8.43991e+07	8.23292e+07	1.03037e+08	9.87341e+07	9.40338e+07	9.54314e+07	68628418	7.09105e+07	7.31164e+07	6.80609e+07	2.70277e+06	4.20346e+07	7.31756e+07	9.40338e+07	8.29278e+07	6.31913e+07	9	9	9	9	9	9	9	9	9	9	High	High	High	High	High	High	High	High	High	High	50	62.878	330.41
High	Q96SB4	SRSF protein kinase 1 OS=Homo sapiens OX=9606 GN=SRPK1 PE=1 SV=2	SRPK1	ENSG00000096063.15	31	5	0.813281	0.00140289	1.7073e+06	1.94877e+06	2.02386e+06	1.95445e+06	2.43269e+06	2.36665e+06	2.32158e+06	2.61041e+06	1.51714e+06	1.61006e+06	1.7533e+06	1.61572e+06	29980.9	992424	1.75402e+06	2.32158e+06	2.26839e+06	1.5089e+06	5	5	5	5	2	5	5	5	5	5	High	High	High	High	Peak Found	High	High	High	High	High	13	21.587	6.45
High	Q15102	Platelet-activating factor acetylhydrolase IB subunit gamma OS=Homo sapiens OX=9606 GN=PAFAH1B3 PE=1 SV=1	PAFAH1B3	ENSG00000079462.7	91	8	1.39842	0.0014077	1.19496e+08	1.06397e+08	1.09516e+08	1.03244e+08	6.00618e+07	8.41881e+07	7.90618e+07	7.53356e+07	1.06187e+08	8.79041e+07	9.48759e+07	8.53512e+07	2.85794e+06	2.45025e+07	6.2395e+07	7.90618e+07	6.5465e+07	4.00757e+07	8	8	8	8	6	8	8	8	8	8	High	High	High	High	High	High	High	High	High	High	43	29.583	60.87
High	P30519	Heme oxygenase 2 OS=Homo sapiens OX=9606 GN=HMOX2 PE=1 SV=2	HMOX2	ENSG00000103415.11; ENSG00000277424.4	57	5	0.857162	0.00141402	5.03596e+06	5.48523e+06	5.66608e+06	5.52247e+06	6.33211e+06	6.22199e+06	6.50993e+06	6.80642e+06	4.47506e+06	4.53186e+06	4.90862e+06	4.56539e+06	29490.2	2.58321e+06	4.61136e+06	6.50993e+06	5.91463e+06	3409579	5	5	5	5	1	5	5	5	5	5	High	High	High	High	Peak Found	High	High	High	High	High	28	37.391	33.17
High	Q9UKN8	General transcription factor 3C polypeptide 4 OS=Homo sapiens OX=9606 GN=GTF3C4 PE=1 SV=2	GTF3C4	ENSG00000125484.11	3	2	0.575652	0.00141652	263906	165707	284164	311486	563318	455197	496887	442261	234512	136906	246176	257503		229808	337364	496887	384315	263595	2	1	2	2		2	2	2	2	2	High	Peak Found	Peak Found	Peak Found	Not Found	Peak Found	High	Peak Found	High	Peak Found	3	4.445	0
High	P37268	Squalene synthase OS=Homo sapiens OX=9606 GN=FDFT1 PE=1 SV=1	FDFT1	ENSG00000079459.12	227	17	1.47083	0.00147146	3.24826e+07	4.13081e+07	3.84814e+07	3.86568e+07	2.60655e+07	2.62471e+07	2.87459e+07	2.61982e+07	2.88647e+07	3.41284e+07	3.33371e+07	3.19573e+07	479023	1.06335e+07	1.94527e+07	2.87459e+07	2.27656e+07	1.6028e+07	16	16	17	16	7	17	16	16	17	16	High	High	High	High	Peak Found	High	High	High	High	High	46	94.647	212.52
High	Q9BWD1	Acetyl-CoA acetyltransferase, cytosolic OS=Homo sapiens OX=9606 GN=ACAT2 PE=1 SV=2	ACAT2	ENSG00000120437.8	353	17	1.379	0.00149632	7.93235e+07	9.89004e+07	9.1499e+07	8.4906e+07	6.67624e+07	6.22015e+07	6.57213e+07	5.90664e+07	7.04884e+07	8.17107e+07	7.92672e+07	7.01911e+07	2.56173e+06	2.7236e+07	4.60999e+07	6.57213e+07	5.13274e+07	2.95014e+07	22	21	21	23	14	18	21	21	22	21	High	High	High	High	High	High	High	High	High	High	76	175.967	317.8
High	Q03426	Mevalonate kinase OS=Homo sapiens OX=9606 GN=MVK PE=1 SV=1	MVK	ENSG00000110921.13	37	6	1.68124	0.00150125	3.21706e+06	3.94079e+06	3.89921e+06	2.95917e+06	1.80693e+06	2.09363e+06	2.21257e+06	2.13912e+06	2.85874e+06	3.25585e+06	3.37795e+06	2.44632e+06	93121.4	737143	1.55167e+06	2.21257e+06	1.85885e+06	1.65108e+06	6	6	7	7	3	5	6	7	7	7	High	High	High	High	Peak Found	High	High	High	High	High	29	33.56	17.72
High	Q14694	Ubiquitin carboxyl-terminal hydrolase 10 OS=Homo sapiens OX=9606 GN=USP10 PE=1 SV=2	USP10	ENSG00000103194.15	62	9	0.788501	0.00151599	2.54243e+06	2.58092e+06	2.90233e+06	2.7469e+06	3.358e+06	3.34787e+06	3.83861e+06	3.3989e+06	2.25925e+06	2.13234e+06	2.51434e+06	2.27084e+06	30257.3	1.36991e+06	2.48123e+06	3.83861e+06	2.95357e+06	2.10642e+06	7	6	7	7	1	8	8	7	7	8	High	High	High	High	Peak Found	High	High	High	High	High	17	47.067	25.8
High	Q99613	Eukaryotic translation initiation factor 3 subunit C OS=Homo sapiens OX=9606 GN=EIF3C PE=1 SV=1	EIF3C	ENSG00000184110.14	249	21	0.813155	0.00152324	3.22972e+07	3.73136e+07	3.60943e+07	3.63e+07	4.07539e+07	4.49417e+07	4.40872e+07	4.50892e+07	2.87e+07	3.08283e+07	3.12691e+07	3.00089e+07	703828	1.66257e+07	3.3308e+07	4.40872e+07	3.91816e+07	2.68227e+07	21	21	21	20	15	21	20	21	21	20	High	High	High	High	Peak Found	High	High	High	High	High	29	118.394	206.91
High	Q02978	Mitochondrial 2-oxoglutarate/malate carrier protein OS=Homo sapiens OX=9606 GN=SLC25A11 PE=1 SV=3	SLC25A11	ENSG00000108528.13	104	11	1.24436	0.0015348	1.34533e+07	1.54854e+07	1.44961e+07	1.38584e+07	1.14382e+07	1.1299e+07	1.22697e+07	1.13482e+07	1.19549e+07	1.27939e+07	1.25582e+07	1.14566e+07	307012	4.66626e+06	8.37412e+06	1.22697e+07	9.86132e+06	6.37739e+06	12	12	12	12	7	12	12	12	12	11	High	High	High	High	Peak Found	High	High	High	High	High	44	53.488	73.58
High	Q14157	Ubiquitin-associated protein 2-like OS=Homo sapiens OX=9606 GN=UBAP2L PE=1 SV=2	UBAP2L	ENSG00000143569.18	22	6	0.841077	0.00154973	6.97744e+06	7.67643e+06	7.83851e+06	7.31799e+06	9.27926e+06	8.44738e+06	9.04384e+06	8.78381e+06	6.20029e+06	6.34221e+06	6.79064e+06	6.04973e+06	132213	3.78551e+06	6.26068e+06	9.04384e+06	7.63294e+06	3.24194e+06	7	7	7	7	1	7	7	7	7	4	High	High	High	High	Peak Found	High	High	High	High	Peak Found	9	22.643	7.48
High	P61221	ATP-binding cassette sub-family E member 1 OS=Homo sapiens OX=9606 GN=ABCE1 PE=1 SV=1	ABCE1	ENSG00000164163.10	100	16	0.819499	0.00157756	1.04015e+07	1.22534e+07	1.19254e+07	1.09632e+07	1.37638e+07	1.34774e+07	1.42178e+07	1.41663e+07	9.243e+06	1.01237e+07	1.03312e+07	9.0632e+06	144991	5.61499e+06	9.98863e+06	1.42178e+07	1.23102e+07	8.69122e+06	14	16	15	14	5	16	15	16	16	16	High	High	High	High	Peak Found	High	High	High	High	High	34	75.727	76.53
High	P35268	60S ribosomal protein L22 OS=Homo sapiens OX=9606 GN=RPL22 PE=1 SV=2	RPL22	ENSG00000116251.9	115	4	0.836305	0.00158201	2.91531e+07	3.18148e+07	3.06017e+07	2.9903e+07	3.70737e+07	3.37293e+07	3.52739e+07	3.72019e+07	2.5906e+07	2.62851e+07	2.65108e+07	2.47206e+07	756233	15124370	2.4998e+07	3.52739e+07	3.23277e+07	1.3541e+07	5	5	5	5	4	5	5	5	5	5	High	High	High	High	High	High	High	High	High	High	51	46.962	167.01
High	Q07955	Serine/arginine-rich splicing factor 1 OS=Homo sapiens OX=9606 GN=SRSF1 PE=1 SV=2	SRSF1	ENSG00000136450.12	259	11	0.757247	0.00159736	3.03711e+07	3.12899e+07	3.34444e+07	3.56713e+07	4.28554e+07	4.01196e+07	4.75254e+07	4.26309e+07	2.69884e+07	2.58515e+07	2.89735e+07	2.94892e+07	149436	1.7483e+07	2.97341e+07	4.75254e+07	3.70453e+07	6.55237e+06	11	11	11	11	6	11	11	11	11	10	High	High	High	High	Peak Found	High	High	High	High	High	43	52.781	212.41
High	P50135	Histamine N-methyltransferase OS=Homo sapiens OX=9606 GN=HNMT PE=1 SV=1	HNMT	ENSG00000150540.13	7	3	1.77304	0.00160533	496315	634857	672698	641990	361352	358793	426843	321780	441036	524514	582770	530728		147415	265915	426843	279620	109147	2	2	3	2		1	2	2	2	1	Peak Found	High	High	High	Not Found	Peak Found	Peak Found	High	High	Peak Found	23	9.491	0
High	P62263	40S ribosomal protein S14 OS=Homo sapiens OX=9606 GN=RPS14 PE=1 SV=3	RPS14	ENSG00000164587.11	161	7	0.807228	0.00160546	5.28799e+07	5.41019e+07	4.73588e+07	5.66536e+07	6.54484e+07	6.33295e+07	6.70813e+07	7.12442e+07	4.69901e+07	4.46986e+07	4.10277e+07	4.68351e+07	1.27104e+06	2.67e+07	4.69359e+07	6.70813e+07	6.19097e+07	2.67726e+07	8	8	8	7	4	8	8	7	8	7	High	High	High	High	High	High	High	High	High	High	64	65.493	213.39
High	O94905	Erlin-2 OS=Homo sapiens OX=9606 GN=ERLIN2 PE=1 SV=1	ERLIN2	ENSG00000147475.14	45	4	1.5319	0.00160679	1.7417e+06	2.14335e+06	2.2578e+06	2.14135e+06	1.32939e+06	1.5242e+06	1.36188e+06	1.4351e+06	1.54771e+06	1.77082e+06	1.95597e+06	1.77024e+06	30307.8	542329	1.12964e+06	1.36188e+06	1.24707e+06	893981	4	4	4	4	1	3	3	3	3	3	High	High	High	High	Peak Found	High	High	High	High	High	26	28.934	36.58
High	P98088	Mucin-5AC OS=Homo sapiens OX=9606 GN=MUC5AC PE=1 SV=4	MUC5AC	ENSG00000283158.1; ENSG00000215182.8	5	2	1.64044	0.00162153	839592	1.12291e+06	1.04763e+06	913707	581768	659703	613851	500518	746078	927738	907583	755354		237335	488931	613851	434939	231572	2	2	2	2		2	2	2	2	2	High	High	Peak Found	Peak Found	Not Found	Peak Found	High	Peak Found	Peak Found	Peak Found	2	5.244	0
High	P49189	4-trimethylaminobutyraldehyde dehydrogenase OS=Homo sapiens OX=9606 GN=ALDH9A1 PE=1 SV=3	ALDH9A1		80	12	1.28421	0.00162211	1.38694e+07	1.53588e+07	1.47013e+07	1.44785e+07	1.05959e+07	1.03319e+07	1.23365e+07	1.21261e+07	1.23246e+07	1.26893e+07	1.2736e+07	1.19693e+07	459308	4.32265e+06	7.65735e+06	1.23365e+07	1.05373e+07	6.24693e+06	11	11	11	11	7	11	10	11	11	11	High	High	High	High	High	High	High	High	High	High	35	64.046	102.12
High	P24928	DNA-directed RNA polymerase II subunit RPB1 OS=Homo sapiens OX=9606 GN=POLR2A PE=1 SV=2	POLR2A		33	11	0.744817	0.00163079	2.58756e+06	2.58938e+06	2.90754e+06	2.69722e+06	3.52654e+06	3.10139e+06	3.59915e+06	3.57131e+06	2.29936e+06	2.13932e+06	2.51886e+06	2.22977e+06	22157.3	1.43867e+06	2.29856e+06	3.59915e+06	3.10339e+06	2.15153e+06	11	10	11	10	1	11	9	11	11	11	High	High	High	High	Peak Found	High	High	High	High	High	8	40.031	7.27
High	P13798	Acylamino-acid-releasing enzyme OS=Homo sapiens OX=9606 GN=APEH PE=1 SV=4	APEH	ENSG00000164062.12	299	26	1.27911	0.00164781	5.32327e+07	6.24484e+07	5.92576e+07	5.55068e+07	4.72476e+07	4.31961e+07	4.6526e+07	4.24729e+07	4.73036e+07	5.15944e+07	5.13359e+07	4.58871e+07	989473	1.92748e+07	3.20143e+07	4.6526e+07	3.69081e+07	2.22503e+07	26	28	26	27	12	25	24	26	26	25	High	High	High	High	Peak Found	High	High	High	High	High	59	188.968	350.47
High	P30101	Protein disulfide-isomerase A3 OS=Homo sapiens OX=9606 GN=PDIA3 PE=1 SV=4	PDIA3	ENSG00000167004.12	527	21	0.860737	0.00165652	1.05991e+08	1.14596e+08	1.15744e+08	1.12834e+08	1.32278e+08	1.34326e+08	1.31948e+08	1.22934e+08	9.41855e+07	9.4678e+07	1.00271e+08	9.32786e+07	1.90479e+06	5.39635e+07	9.95539e+07	1.31948e+08	1.06827e+08	5.82988e+07	23	23	23	23	16	23	24	23	23	23	High	High	High	High	High	High	High	High	High	High	58	150.522	677.51
High	Q9UKD2	mRNA turnover protein 4 homolog OS=Homo sapiens OX=9606 GN=MRTO4 PE=1 SV=2	MRTO4	ENSG00000053372.4	33	4	0.857564	0.0016734	3.66385e+06	4.02812e+06	4.24434e+06	4.13452e+06	4.70135e+06	4.81706e+06	4.88418e+06	4.63796e+06	3.25577e+06	3.32801e+06	3.67695e+06	3.41798e+06	59556.6	1.91793e+06	3.57011e+06	4.88418e+06	4.03029e+06	2.49078e+06	4	4	4	4	2	4	4	4	4	4	High	High	High	High	Peak Found	High	High	High	High	High	18	14.682	30.52
High	Q08188	Protein-glutamine gamma-glutamyltransferase E OS=Homo sapiens OX=9606 GN=TGM3 PE=1 SV=4	TGM3	ENSG00000125780.11	7	5	1.70239	0.00168861	3.75588e+06	2.76899e+06	2.74591e+06	3.06421e+06	1.68348e+06	1.743e+06	1.60539e+06	1.96528e+06	3.33755e+06	2.28772e+06	2.37883e+06	2.53316e+06	113413	686783	1.2918e+06	1.60539e+06	1.70779e+06	1.00877e+06	4	3	3	4	3	4	2	1	3	4	High	Peak Found	Peak Found	Peak Found	Peak Found	Peak Found	Peak Found	Peak Found	Peak Found	Peak Found	10	19.428	0
High	Q8NBJ5	Procollagen galactosyltransferase 1 OS=Homo sapiens OX=9606 GN=COLGALT1 PE=1 SV=1	COLGALT1; GLT25D1	ENSG00000130309.10	29	6	0.707371	0.00169159	2.17295e+06	2.41184e+06	2.40903e+06	2.36872e+06	2.80729e+06	3.33336e+06	3.42087e+06	3.56699e+06	1.93093e+06	1.99264e+06	2.08699e+06	1.9582e+06		1.14524e+06	2.47048e+06	3.42087e+06	3.09964e+06	1.85173e+06	6	6	6	6		6	6	6	6	6	High	High	High	High	Not Found	High	High	High	High	High	10	20.913	6.85
High	P78344	Eukaryotic translation initiation factor 4 gamma 2 OS=Homo sapiens OX=9606 GN=EIF4G2 PE=1 SV=1	EIF4G2	ENSG00000110321.16	133	20	0.797362	0.00170338	1.11162e+07	1.29644e+07	1.29824e+07	1.18744e+07	1.72373e+07	1.49757e+07	1.5362e+07	1.57892e+07	9.87812e+06	1.07111e+07	1.12469e+07	9.81648e+06	135687	7.03202e+06	1.10991e+07	1.5362e+07	1.37205e+07	9.39402e+06	18	18	18	18	4	19	18	19	19	18	High	High	High	High	Peak Found	High	High	High	High	High	28	92.387	94.57
High	Q8TBC4	NEDD8-activating enzyme E1 catalytic subunit OS=Homo sapiens OX=9606 GN=UBA3 PE=1 SV=2	UBA3	ENSG00000144744.16	44	6	1.52739	0.00170768	3.31773e+06	3.89991e+06	3.77295e+06	3.66902e+06	2.77828e+06	1.87578e+06	2.23863e+06	2.63373e+06	2.9482e+06	3.22208e+06	3.26858e+06	3.03315e+06	56007.1	1.13341e+06	1.39021e+06	2.23863e+06	2.28865e+06	1.32917e+06	6	6	6	6	1	6	5	5	6	6	High	High	High	High	Peak Found	High	High	High	High	High	22	25.563	7.98
High	O75964	ATP synthase subunit g, mitochondrial OS=Homo sapiens OX=9606 GN=ATP5MG PE=1 SV=3	ATP5L	ENSG00000167283.7	72	3	1.30789	0.00173229	8.56155e+06	9.78917e+06	1.00872e+07	8.68933e+06	7.44196e+06	7.17403e+06	6.95444e+06	6.90058e+06	7.60796e+06	8.08774e+06	8.73869e+06	7183400	211931	3.03598e+06	5.31695e+06	6.95444e+06	5.99646e+06	5.02562e+06	3	3	3	3	2	3	3	3	3	3	High	High	High	High	High	High	High	High	High	High	32	13.702	52.98
High	O60610	Protein diaphanous homolog 1 OS=Homo sapiens OX=9606 GN=DIAPH1 PE=1 SV=2	DIAPH1	ENSG00000131504.15	141	21	0.699437	0.0017396	9.94924e+06	1.08263e+07	1.11457e+07	1.03653e+07	1.75879e+07	1.36036e+07	1.45614e+07	1.57366e+07	8.8411e+06	8.9446e+06	9.65568e+06	8.56889e+06	133849	7.17504e+06	1.00821e+07	1.45614e+07	1.36748e+07	8.56099e+06	20	21	20	20	5	21	20	22	23	22	High	High	High	High	Peak Found	High	High	High	High	High	25	125.181	55.08
High	P67809	Y-box-binding protein 1 OS=Homo sapiens OX=9606 GN=YBX1 PE=1 SV=3	YBX1	ENSG00000065978.18	199	11	0.763875	0.00174938	2.2834e+07	2.66027e+07	2.71821e+07	2.63721e+07	3.05569e+07	3.49462e+07	3.59302e+07	3.44039e+07	2.02908e+07	2.1979e+07	2.35483e+07	2.18016e+07	78576.5	1.24658e+07	2.59e+07	3.59302e+07	2.98962e+07	3.84199e+06	14	13	15	14	3	15	11	16	14	13	High	High	High	High	Peak Found	High	High	High	High	High	61	113.972	251.13
High	Q13011	Delta(3,5)-Delta(2,4)-dienoyl-CoA isomerase, mitochondrial OS=Homo sapiens OX=9606 GN=ECH1 PE=1 SV=2	ECH1	ENSG00000282853.1; ENSG00000104823.8	224	11	1.2652	0.00175883	3.92178e+07	4.48375e+07	4.34003e+07	4.49521e+07	3.42956e+07	3.54468e+07	3.68075e+07	3.37652e+07	3.48497e+07	3.70444e+07	3.75984e+07	3.71615e+07	1.09311e+06	1.3991e+07	2.6271e+07	3.68075e+07	2.93413e+07	2.14943e+07	13	14	14	14	10	13	14	14	14	13	High	High	High	High	High	High	High	High	High	High	41	88.995	273.04
High	Q14914	Prostaglandin reductase 1 OS=Homo sapiens OX=9606 GN=PTGR1 PE=1 SV=2	PTGR1	ENSG00000106853.18	20	3	0.711789	0.00180614	1.10056e+06	1.26066e+06	1.13894e+06	1.13773e+06	1.68931e+06	1.42144e+06	1.5092e+06	1.7241e+06	977978	1.04155e+06	986681	940553	84327.3	689162	1.05349e+06	1.5092e+06	1.49821e+06	819132	3	3	3	3	1	3	3	3	3	2	High	High	High	High	Peak Found	High	High	High	High	High	13	9.749	10.93
High	P67812	Signal peptidase complex catalytic subunit SEC11A OS=Homo sapiens OX=9606 GN=SEC11A PE=1 SV=1	SEC11A	ENSG00000140612.13	30	4	0.756461	0.0018147	2.09367e+06	2.62528e+06	2.74123e+06	2.66286e+06	3.94117e+06	3.3557e+06	3.44547e+06	3.54516e+06	1.86047e+06	2.16899e+06	2.37478e+06	2.20137e+06		1.60782e+06	2.48704e+06	3.44547e+06	3.08067e+06	2.01036e+06	3	4	4	4		4	4	4	4	4	High	High	High	High	Not Found	High	High	High	High	High	16	11.6	28.32
High	Q99714	3-hydroxyacyl-CoA dehydrogenase type-2 OS=Homo sapiens OX=9606 GN=HSD17B10 PE=1 SV=3	HSD17B10	ENSG00000072506.12	210	14	0.84232	0.00186019	2.61844e+07	2.6673e+07	2.69686e+07	2.45695e+07	3.27182e+07	2.99695e+07	3.3267e+07	3.0034e+07	2.3268e+07	2.20371e+07	2.33634e+07	2.03114e+07	744231	1.33475e+07	2.22115e+07	3.3267e+07	2.60989e+07	2.05568e+07	17	17	17	17	9	17	17	17	17	17	High	High	High	High	Peak Found	High	High	High	High	High	89	131.947	250.23
High	O43175	D-3-phosphoglycerate dehydrogenase OS=Homo sapiens OX=9606 GN=PHGDH PE=1 SV=4	PHGDH	ENSG00000092621.11	501	19	0.761704	0.00188854	8.55452e+07	1.07867e+08	9.9618e+07	9.32095e+07	1.32777e+08	1.185e+08	1.28174e+08	1.24979e+08	7.60172e+07	8.91189e+07	8.63008e+07	7.70556e+07	2.35744e+06	5.41668e+07	8.78249e+07	1.28174e+08	1.08604e+08	6.0109e+07	22	21	21	22	13	22	21	23	21	19	High	High	High	High	High	High	High	High	High	High	44	157.236	635.89
High	Q9NYY8	FAST kinase domain-containing protein 2, mitochondrial OS=Homo sapiens OX=9606 GN=FASTKD2 PE=1 SV=1	FASTKD2	ENSG00000118246.13	25	6	0.750564	0.00194537	1.61415e+06	1.72757e+06	1.98375e+06	1.6768e+06	2.35221e+06	2.17235e+06	2.18354e+06	2.41334e+06	1.43437e+06	1.4273e+06	1.71856e+06	1.3862e+06	28035.5	959595	1.61001e+06	2.18354e+06	2.09714e+06	1.20777e+06	6	6	6	6	1	6	6	6	6	5	High	High	High	High	Peak Found	High	High	High	High	High	11	16.561	0
High	P82970	High mobility group nucleosome-binding domain-containing protein 5 OS=Homo sapiens OX=9606 GN=HMGN5 PE=1 SV=1	HMGN5	ENSG00000198157.10	41	5	1.54654	0.00195871	7.80132e+06	9.95891e+06	8.06391e+06	7.54765e+06	5.09811e+06	5.86627e+06	5.16043e+06	4.70903e+06	6.93241e+06	8.22798e+06	6.98591e+06	6.23959e+06		2.07979e+06	4.34772e+06	5.16043e+06	4.09204e+06	46054.6	5	5	5	5		5	5	5	5	1	High	High	High	High	Not Found	High	High	High	High	Peak Found	19	22.667	38.56
High	Q09666	Neuroblast differentiation-associated protein AHNAK OS=Homo sapiens OX=9606 GN=AHNAK PE=1 SV=2	AHNAK	ENSG00000124942.13	455	77	0.77221	0.00196409	6.33928e+07	6.16292e+07	7.46715e+07	6.50929e+07	8.41028e+07	8.67138e+07	7.97935e+07	8.22843e+07	5.63321e+07	5.09176e+07	6.46892e+07	5.38118e+07	9.49305e+06	3.43101e+07	6.4267e+07	7.97935e+07	7.15032e+07	2.14406e+07	68	68	67	69	17	71	70	70	72	59	High	High	High	High	High	High	High	High	High	High	34	306.321	271.46
High	P07910	Heterogeneous nuclear ribonucleoproteins C1/C2 OS=Homo sapiens OX=9606 GN=HNRNPC PE=1 SV=4	HNRNPC	ENSG00000092199.17	259	10	0.771661	0.0019866	4.77734e+07	5.00905e+07	5.81058e+07	6.00261e+07	7.04059e+07	6.98063e+07	7.56666e+07	6.94703e+07	4.24524e+07	4.13844e+07	5.0338e+07	4.96231e+07	776430	2.87224e+07	5.17361e+07	7.56666e+07	6.03681e+07	1.54767e+07	11	12	12	11	7	11	12	11	12	9	High	High	High	High	Peak Found	High	High	High	High	High	38	74.624	327.7
High	Q9UBM7	7-dehydrocholesterol reductase OS=Homo sapiens OX=9606 GN=DHCR7 PE=1 SV=1	DHCR7	ENSG00000172893.15	109	7	1.35258	0.00200153	1.11727e+07	1.29872e+07	1.3643e+07	1.29819e+07	8.84377e+06	1.01349e+07	9.88859e+06	9.31114e+06	9.92825e+06	1.07299e+07	1.18192e+07	1.0732e+07	301970	3.60785e+06	7.51137e+06	9.88859e+06	8.09118e+06	5.67733e+06	6	6	6	6	4	6	6	6	6	6	High	High	High	High	High	High	High	High	High	High	17	26.325	111.67
High	Q06481	Amyloid-like protein 2 OS=Homo sapiens OX=9606 GN=APLP2 PE=1 SV=2	APLP2	ENSG00000084234.16	7	3	4.06066	0.00201649	773259	1.22163e+06	1.31041e+06	971473	208852	270104	545640	269983	687133	1.0093e+06	1.13523e+06	803109	22625.9	85202	200184	545640	234609	159022	2	2	2	2	1	1	2	2	2	2	High	High	High	Peak Found	Peak Found	Peak Found	Peak Found	High	Peak Found	Peak Found	6	16.355	2.73
High	P27361	Mitogen-activated protein kinase 3 OS=Homo sapiens OX=9606 GN=MAPK3 PE=1 SV=4	MAPK3	ENSG00000102882.11	45	3	0.547441	0.00203258	394248	497114	369043	357113	550375	710665	714352	683623	350336	410712	319708	295222	9319.9	224528	526701	714352	594054	386177	1	1	1	1	1	2	2	2	2	2	High	High	High	High	Peak Found	High	High	High	High	High	22	24.718	27.37
High	P36873	Serine/threonine-protein phosphatase PP1-gamma catalytic subunit OS=Homo sapiens OX=9606 GN=PPP1CC PE=1 SV=1	PPP1CC	ENSG00000186298.11	190	2	0.733151	0.0020483	1.95653e+06	2.18591e+06	2.37609e+06	1.99383e+06	2.5955e+06	2.88448e+06	3.06978e+06	2.8166e+06	1.73861e+06	1.80598e+06	2.05845e+06	1.64829e+06	25314.8	1.05884e+06	2.1378e+06	3.06978e+06	2.44756e+06	1.33158e+06	2	2	2	2	1	2	2	2	2	2	High	High	High	High	Peak Found	High	High	High	High	High	64	99.242	135.01
High	P36915	Guanine nucleotide-binding protein-like 1 OS=Homo sapiens OX=9606 GN=GNL1 PE=1 SV=2	GNL1	ENSG00000235986.9; ENSG00000229470.9; ENSG00000204590.12; ENSG00000206492.11; ENSG00000232143.9; ENSG00000228581.9; ENSG00000226882.9	50	8	1.28911	0.00205971	3.89282e+06	4.63144e+06	4.42555e+06	3.90664e+06	3.28747e+06	3.17605e+06	3.30574e+06	3.11426e+06	3.45924e+06	3.82646e+06	3.83393e+06	3.22959e+06	66035	1.34114e+06	2.35389e+06	3.30574e+06	2.70622e+06	1.86073e+06	8	8	8	8	2	7	8	8	8	8	High	High	High	High	Peak Found	High	High	High	High	High	17	36.741	14.44
High	P18085	ADP-ribosylation factor 4 OS=Homo sapiens OX=9606 GN=ARF4 PE=1 SV=3	ARF4	ENSG00000168374.10	328	8	0.811903	0.00208668	1.96965e+07	1.96448e+07	2.18389e+07	2.18604e+07	2.35723e+07	2.64794e+07	2.55368e+07	2.56213e+07	1.75027e+07	1.62304e+07	1.89194e+07	1.80718e+07	909684	9.61643e+06	1.96249e+07	2.55368e+07	2.22643e+07	1.3853e+07	9	9	9	9	5	9	8	9	8	9	High	High	High	High	Peak Found	High	High	High	High	High	80	101.792	431.17
High	Q01082	Spectrin beta chain, non-erythrocytic 1 OS=Homo sapiens OX=9606 GN=SPTBN1 PE=1 SV=2	SPTBN1	ENSG00000115306.15	1335	100	1.20945	0.00208755	2.4344e+08	2.72979e+08	2.73827e+08	2.61039e+08	2.03745e+08	2.26032e+08	2.2431e+08	2.17229e+08	2.16326e+08	2.25533e+08	2.37221e+08	2.15799e+08	4.73583e+06	8.31187e+07	1.67521e+08	2.2431e+08	1.88767e+08	1.21139e+08	104	107	103	106	58	104	105	106	104	103	High	High	High	High	High	High	High	High	High	High	60	756.387	1638.68
High	Q13765	Nascent polypeptide-associated complex subunit alpha OS=Homo sapiens OX=9606 GN=NACA PE=1 SV=1	NACA	ENSG00000196531.10	97	5	0.830748	0.00211398	2.26333e+07	2.61784e+07	2.74843e+07	2.58812e+07	3.1278e+07	3.09659e+07	3.13879e+07	3.38614e+07	2.01124e+07	2.16284e+07	2.38102e+07	2.13958e+07	123108	1.276e+07	2.295e+07	3.13879e+07	2.94248e+07	2.16865e+06	5	6	6	6	3	5	5	5	6	4	High	High	High	High	Peak Found	High	High	High	High	Peak Found	33	51.627	107.13
High	P61421	V-type proton ATPase subunit d 1 OS=Homo sapiens OX=9606 GN=ATP6V0D1 PE=1 SV=1	ATP6V0D1	ENSG00000159720.11	84	10	1.30955	0.00214656	9.92495e+06	9.48675e+06	1.13278e+07	9.87826e+06	7.57343e+06	7.54867e+06	8.45886e+06	7.47399e+06	8.81951e+06	7.83788e+06	9.81345e+06	8.16628e+06	129464	3.08961e+06	5.59461e+06	8.45886e+06	6.49473e+06	4.10371e+06	10	9	11	10	3	9	8	10	9	9	High	High	High	High	Peak Found	High	High	High	High	High	41	48.872	40.48
High	P35613	Basigin OS=Homo sapiens OX=9606 GN=BSG PE=1 SV=2	BSG	ENSG00000172270.18	158	7	0.681522	0.00217532	1.55846e+07	1.89952e+07	1.93168e+07	1.87915e+07	2.25074e+07	2.87231e+07	2.80436e+07	2.74009e+07	1.38488e+07	15693653	1.67345e+07	1.55348e+07	282203	9.18198e+06	2.12878e+07	2.80436e+07	2.38108e+07	1.55112e+07	10	9	9	9	5	9	9	10	9	10	High	High	High	High	Peak Found	High	High	High	High	High	29	59.272	179.32
High	Q9NXE4	Sphingomyelin phosphodiesterase 4 OS=Homo sapiens OX=9606 GN=SMPD4 PE=1 SV=3			10	2	0.766049	0.00223295	520482	570065	632259	540948	755227	715633	671989	734684	462511	470984	547737	447198		308098	530383	671989	638424	412157	2	2	2	2		2	2	2	2	2	High	High	High	High	Not Found	High	High	High	Peak Found	High	3	5.962	2.05
High	P53985	Monocarboxylate transporter 1 OS=Homo sapiens OX=9606 GN=SLC16A1 PE=1 SV=3	SLC16A1	ENSG00000281917.2; ENSG00000155380.11	38	4	0.680886	0.00223519	4.61172e+06	5.65553e+06	5.16229e+06	5.32806e+06	6.29282e+06	7.77493e+06	7.63197e+06	7.93648e+06	4.09807e+06	4.67256e+06	4.47218e+06	4.40467e+06	156051	2.56718e+06	5.7623e+06	7.63197e+06	6.89663e+06	4.93554e+06	4	4	3	4	2	4	3	4	4	3	High	High	High	High	Peak Found	High	High	High	High	High	14	22.905	38.46
High	Q13630	GDP-L-fucose synthase OS=Homo sapiens OX=9606 GN=TSTA3 PE=1 SV=1	TSTA3	ENSG00000278243.2; ENSG00000104522.15	73	9	1.25333	0.00224898	1.08754e+07	1.28627e+07	1.19097e+07	1.16075e+07	8.34412e+06	9.6631e+06	9.64618e+06	9.11752e+06	9.66409e+06	1.06271e+07	1.03176e+07	9.59584e+06	186868	3.40402e+06	7.1617e+06	9.64618e+06	7.92292e+06	5.03375e+06	9	9	9	9	4	9	9	9	9	9	High	High	High	High	Peak Found	High	High	High	High	High	37	41.002	51.4
High	O15400	Syntaxin-7 OS=Homo sapiens OX=9606 GN=STX7 PE=1 SV=4	STX7	ENSG00000079950.13	13	3	1.2812	0.00226357	3.31285e+06	3.78659e+06	3.64244e+06	3.58547e+06	2.31931e+06	2.93001e+06	2.83071e+06	2.81082e+06	2943864	3.12846e+06	3.15551e+06	2.96408e+06	68846.3	946172	2.17154e+06	2.83071e+06	2.44254e+06	1.3911e+06	3	3	3	3	1	3	3	3	3	3	High	High	High	High	Peak Found	High	Peak Found	High	High	High	15	13.686	10.63
High	Q13576	Ras GTPase-activating-like protein IQGAP2 OS=Homo sapiens OX=9606 GN=IQGAP2 PE=1 SV=4	IQGAP2	ENSG00000145703.15	174	30	0.793197	0.00226726	1.44777e+07	1.71342e+07	1.69912e+07	1.44358e+07	2.01811e+07	1.92396e+07	2.02496e+07	1.94923e+07	1.28651e+07	1.41562e+07	1.47197e+07	1.1934e+07	74221.6	8.23297e+06	1.42592e+07	2.02496e+07	1.69384e+07	1.17824e+07	27	29	28	26	3	28	27	28	28	29	High	High	High	High	Peak Found	High	High	High	High	High	30	142.469	82.1
High	P23396	40S ribosomal protein S3 OS=Homo sapiens OX=9606 GN=RPS3 PE=1 SV=2	RPS3	ENSG00000149273.14	593	16	0.797281	0.00227946	1.54983e+08	1.72926e+08	1.76337e+08	1.76692e+08	1.96326e+08	2.19432e+08	2.18635e+08	2.33099e+08	1.37721e+08	1.4287e+08	1.52764e+08	146070259	5.33237e+06	8.00918e+07	1.62629e+08	2.18635e+08	2.02558e+08	1.27633e+08	18	20	20	19	16	19	19	21	22	21	High	High	High	High	High	High	High	High	High	High	74	96.539	677.76
High	P51858	Hepatoma-derived growth factor OS=Homo sapiens OX=9606 GN=HDGF PE=1 SV=1	HDGF	ENSG00000143321.18	184	13	0.840557	0.00231528	2.52014e+07	2.81496e+07	2.77347e+07	2.65116e+07	3.25377e+07	3.19984e+07	3.46357e+07	3.04605e+07	2.23944e+07	2.3257e+07	2.40271e+07	2.19169e+07	68961.4	1.32739e+07	2.37152e+07	3.46357e+07	26469538	2.30644e+06	14	14	14	14	2	14	14	13	13	11	High	High	High	High	Peak Found	High	High	High	High	High	67	84.159	186.21
High	P30837	Aldehyde dehydrogenase X, mitochondrial OS=Homo sapiens OX=9606 GN=ALDH1B1 PE=1 SV=3	ALDH1B1		341	17	1.28672	0.00232779	5.53537e+07	6.45792e+07	6.36557e+07	5.54384e+07	4.81929e+07	4.46055e+07	4.71978e+07	4.53583e+07	4.91884e+07	5.33548e+07	5.51461e+07	4.58305e+07	1.51099e+06	1.96605e+07	3.30589e+07	4.71978e+07	3.94154e+07	1.94335e+07	19	20	19	19	12	18	19	20	20	20	High	High	High	High	High	High	High	High	High	High	52	149.782	379.51
High	P14550	Aldo-keto reductase family 1 member A1 OS=Homo sapiens OX=9606 GN=AKR1A1 PE=1 SV=3	AKR1A1	ENSG00000117448.13	94	11	1.32574	0.00233446	1.2829e+07	1.55807e+07	1.53572e+07	1.35677e+07	1.09585e+07	1.10642e+07	1.08594e+07	1.07786e+07	1.14001e+07	1.28727e+07	13304247	1.12163e+07	294618	4.47058e+06	8.20007e+06	1.08594e+07	9.3664e+06	4.5339e+06	11	10	11	11	6	10	10	10	11	10	High	High	High	High	Peak Found	High	High	High	High	High	43	51.968	70.27
High	Q6PIU2	Neutral cholesterol ester hydrolase 1 OS=Homo sapiens OX=9606 GN=NCEH1 PE=1 SV=3	NCEH1		51	6	1.31394	0.00233755	3.41392e+06	3.80662e+06	4.29721e+06	3.87399e+06	2.95939e+06	2.88608e+06	2.83139e+06	2.99082e+06	3.03368e+06	3145001	3.72275e+06	3.2026e+06	45951.6	1.20729e+06	2.13898e+06	2.83139e+06	2.59896e+06	1.78854e+06	6	6	6	6	2	6	6	6	6	6	High	High	High	High	Peak Found	High	High	High	High	High	19	26.268	24.81
High	P51648	Aldehyde dehydrogenase family 3 member A2 OS=Homo sapiens OX=9606 GN=ALDH3A2 PE=1 SV=1	ALDH3A2	ENSG00000072210.18	172	10	0.64706	0.00235297	1.34592e+07	1.61053e+07	1.46221e+07	1.54551e+07	2.99121e+07	2.20925e+07	2.21422e+07	2.43406e+07	1.19601e+07	1.33061e+07	1.26674e+07	1.27766e+07	519528	1.22028e+07	1.63736e+07	2.21422e+07	2.11515e+07	1.47165e+07	11	11	11	11	10	11	11	11	11	11	High	High	High	High	High	High	High	High	High	High	30	68.974	134.38
High	P16444	Dipeptidase 1 OS=Homo sapiens OX=9606 GN=DPEP1 PE=1 SV=3	DPEP1	ENSG00000015413.9	223	15	1.81842	0.00239133	2.90115e+07	3.87841e+07	4.28698e+07	4.10474e+07	2.14219e+07	1.97802e+07	2.24796e+07	2.37305e+07	2.57802e+07	3.20432e+07	3.71388e+07	3.39335e+07	592617	8.73916e+06	1.46598e+07	2.24796e+07	2.06213e+07	1.72764e+07	15	16	16	16	6	15	14	15	15	15	High	High	High	High	High	High	High	High	High	High	55	94.799	265.63
High	P27635	60S ribosomal protein L10 OS=Homo sapiens OX=9606 GN=RPL10 PE=1 SV=4	RPL10		239	10	0.779963	0.00241077	2.98638e+07	3.19924e+07	3.31739e+07	3.45881e+07	3.68539e+07	4.23694e+07	4.11812e+07	4.24865e+07	2.65376e+07	2.64319e+07	2.87391e+07	2.85937e+07	738060	1.50347e+07	3.14016e+07	4.11812e+07	3.69199e+07	1.84505e+07	15	14	14	15	11	14	14	15	14	15	High	High	High	High	High	High	High	High	High	High	47	67.731	239.61
High	P13995	Bifunctional methylenetetrahydrofolate dehydrogenase/cyclohydrolase, mitochondrial OS=Homo sapiens OX=9606 GN=MTHFD2 PE=1 SV=2	MTHFD2	ENSG00000065911.11	57	6	0.75917	0.00241759	3.63409e+06	4.03646e+06	4.18087e+06	3.55964e+06	4.71485e+06	4.97218e+06	5.67665e+06	5.13167e+06	3.22932e+06	3.33489e+06	3.62196e+06	2.94273e+06	171727	1.92344e+06	3.68508e+06	5.67665e+06	4.45931e+06	2.48398e+06	5	5	5	5	4	5	5	5	5	5	High	High	High	High	Peak Found	High	High	High	High	High	23	22.735	44.01
High	P62266	40S ribosomal protein S23 OS=Homo sapiens OX=9606 GN=RPS23 PE=1 SV=3	RPS23	ENSG00000186468.12	140	5	0.801468	0.00241857	4.82401e+07	5.20635e+07	4.96521e+07	5.42277e+07	7.30205e+07	6.24839e+07	62051719	6.44276e+07	4.28671e+07	4.30144e+07	4.30144e+07	44829653	1.11516e+06	2.9789e+07	46309250	62051719	55986176	2.8001e+07	5	5	5	5	5	5	5	5	5	5	High	High	High	High	High	High	High	High	High	High	48	42.27	231.9
High	P15880	40S ribosomal protein S2 OS=Homo sapiens OX=9606 GN=RPS2 PE=1 SV=2	RPS2	ENSG00000140988.15	422	12	0.808664	0.00245417	1.16535e+08	1.26539e+08	1.24669e+08	1.28304e+08	1.78668e+08	1.53566e+08	1.48748e+08	1.5708e+08	1.03555e+08	1.04546e+08	1.08003e+08	1.06068e+08	4.51462e+06	7.28882e+07	1.13814e+08	1.48748e+08	1.36499e+08	9.86643e+07	14	13	14	14	11	14	13	14	13	13	High	High	High	High	High	High	High	High	High	High	43	90.401	572.68
High	P09669	Cytochrome c oxidase subunit 6C OS=Homo sapiens OX=9606 GN=COX6C PE=1 SV=2	COX6C	ENSG00000164919.10	41	2	1.42477	0.00254642	1.60048e+07	1.5638e+07	1.72119e+07	1.85789e+07	8.29923e+06	1.26614e+07	11397543	1.19162e+07	1.42222e+07	12920027	1.4911e+07	1.5359e+07	455998	3.3857e+06	9.38385e+06	11397543	1.03549e+07	7.0964e+06	2	2	2	2	2	2	2	2	2	2	High	High	High	High	Peak Found	High	High	High	High	High	20	4.784	22.93
High	Q8TEM1	Nuclear pore membrane glycoprotein 210 OS=Homo sapiens OX=9606 GN=NUP210 PE=1 SV=3	NUP210	ENSG00000132182.11	102	21	0.883787	0.00256178	7.8443e+06	8.75358e+06	8.41216e+06	8.38788e+06	9.50894e+06	9.27787e+06	9.50021e+06	1.00458e+07	6.9706e+06	7.23214e+06	7.2876e+06	6.9342e+06	32908.6	3.87921e+06	6.87618e+06	9.50021e+06	8.7296e+06	4.64964e+06	18	19	18	18	1	18	19	19	19	17	High	High	High	High	Peak Found	High	High	High	High	High	17	90.669	71.84
High	P62913	60S ribosomal protein L11 OS=Homo sapiens OX=9606 GN=RPL11 PE=1 SV=2	RPL11	ENSG00000142676.12	180	7	0.859363	0.00259754	5.81557e+07	6.42687e+07	6.45095e+07	6.22741e+07	6.83665e+07	7.29342e+07	7.49918e+07	7.43177e+07	5.16783e+07	5.30984e+07	5.58857e+07	5.14815e+07	2.15511e+06	2.78904e+07	5.40543e+07	7.49918e+07	6.45804e+07	3.72399e+07	8	8	8	8	6	8	6	8	8	7	High	High	High	High	High	High	High	High	High	High	56	54.213	221.85
High	P14324	Farnesyl pyrophosphate synthase OS=Homo sapiens OX=9606 GN=FDPS PE=1 SV=4	FDPS	ENSG00000160752.14	278	10	1.45033	0.00274043	6.56786e+07	8.43519e+07	7.72384e+07	7.77631e+07	4.91132e+07	5.84587e+07	5.74989e+07	4.93743e+07	5.83633e+07	6.96909e+07	6.6913e+07	6.42861e+07	1.82344e+06	2.00359e+07	4.3326e+07	5.74989e+07	4.29052e+07	2.83421e+07	13	13	13	13	10	14	12	13	13	11	High	High	High	High	High	High	High	High	High	High	33	79.933	214.54
High	P24539	ATP synthase F(0) complex subunit B1, mitochondrial OS=Homo sapiens OX=9606 GN=ATP5PB PE=1 SV=2	ATP5F1	ENSG00000116459.10	119	9	1.1617	0.00275438	2.59704e+07	2.90725e+07	2.85826e+07	2.74394e+07	2.32427e+07	2.45512e+07	2.46115e+07	2.36729e+07	2.30778e+07	2.40195e+07	2.47616e+07	2.2684e+07	608335	9.48195e+06	1.81958e+07	2.46115e+07	2.05712e+07	1.43251e+07	8	8	8	8	5	8	8	8	8	8	High	High	High	High	Peak Found	High	High	High	High	High	43	44.23	121.23
High	P53597	Succinate--CoA ligase [ADP/GDP-forming] subunit alpha, mitochondrial OS=Homo sapiens OX=9606 GN=SUCLG1 PE=1 SV=4	SUCLG1	ENSG00000163541.11	80	7	1.36388	0.00275859	1.94932e+07	2.17966e+07	2.1579e+07	1.82638e+07	1.33593e+07	1.61705e+07	1.60105e+07	1.41037e+07	1.73221e+07	1.80082e+07	1.86942e+07	15098509	126896	5.45e+06	1.19846e+07	1.60105e+07	1.22558e+07	4.45681e+06	8	7	7	7	3	7	7	6	7	8	High	High	High	High	High	High	High	High	High	High	40	46.336	94.91
High	P62701	40S ribosomal protein S4, X isoform OS=Homo sapiens OX=9606 GN=RPS4X PE=1 SV=2	RPS4X	ENSG00000198034.10	360	10	0.832156	0.00276208	1.08595e+08	1.17482e+08	1.246e+08	1.21146e+08	1.5772e+08	1.37863e+08	1.39798e+08	1.4696e+08	9.64994e+07	9.7063e+07	1.07943e+08	1.0015e+08	5.72298e+06	6.43426e+07	1.02176e+08	1.39798e+08	1.27705e+08	8.31107e+07	15	15	15	15	9	15	15	15	15	15	High	High	High	High	High	High	High	High	High	High	44	87.097	502.89
High	P25705	ATP synthase subunit alpha, mitochondrial OS=Homo sapiens OX=9606 GN=ATP5F1A PE=1 SV=1	ATP5A1	ENSG00000152234.15	918	25	1.21048	0.00284402	3.19045e+08	3.729e+08	3.58215e+08	3.29922e+08	2.67902e+08	2.84173e+08	2.84312e+08	2.87555e+08	2.8351e+08	3.08087e+08	3.10328e+08	2.72744e+08	1.15953e+07	1.09292e+08	2.10612e+08	2.84312e+08	2.49879e+08	1.50865e+08	33	35	36	34	26	34	32	33	35	34	High	High	High	High	High	High	High	High	High	High	57	253.409	1158.44
High	Q9HAB8	Phosphopantothenate--cysteine ligase OS=Homo sapiens OX=9606 GN=PPCS PE=1 SV=2	PPCS	ENSG00000127125.8	48	6	1.43144	0.00287202	4.60959e+06	5.52616e+06	4.99369e+06	5.09493e+06	3.37121e+06	3.67669e+06	4.27885e+06	3.36479e+06	4.09617e+06	4.56567e+06	4.32612e+06	4.21194e+06	19025.3	1.3753e+06	2.72494e+06	4.27885e+06	2.92393e+06	2.61606e+06	6	6	6	6	1	6	5	6	6	6	High	High	High	High	Peak Found	High	High	High	High	High	18	14.566	20.45
High	Q8N4T8	Carbonyl reductase family member 4 OS=Homo sapiens OX=9606 GN=CBR4 PE=1 SV=3	CBR4	ENSG00000145439.11	7	2	1.68055	0.00288439	532925	581839	531730	399538	323587	283827	309928	338807	473568	480711	460647	330295		132009	210355	309928	294416	146064	2	2	2	1		2	1	2	2	1	High	High	High	High	Not Found	Peak Found	Peak Found	High	Peak Found	Peak Found	10	7.657	6.16
High	Q8WXX5	DnaJ homolog subfamily C member 9 OS=Homo sapiens OX=9606 GN=DNAJC9 PE=1 SV=1	DNAJC9	ENSG00000213551.4	13	4	0.835609	0.00292382	2.57986e+06	2.6889e+06	2.61497e+06	2.59839e+06	3.11783e+06	3.19586e+06	3.12116e+06	2.80165e+06	2.29251e+06	2.22155e+06	2.2654e+06	2.14807e+06		1.27193e+06	2.36857e+06	3.12116e+06	2.43457e+06	1.22734e+06	4	4	4	4		4	4	4	4	4	High	High	High	High	Not Found	High	High	High	High	Peak Found	23	13.647	0
High	Q15942	Zyxin OS=Homo sapiens OX=9606 GN=ZYX PE=1 SV=1	ZYX	ENSG00000159840.15	14	4	0.489326	0.00294044	568884	573785	818793	754408	1.5569e+06	1.129e+06	1.60322e+06	1.15743e+06	505522	474057	709335	623663		635142	836747	1.60322e+06	1.00578e+06		2	3	3	3		3	3	4	3		High	Peak Found	High	High	Not Found	High	High	High	High	Not Found	13	14.829	0
High	Q9NUJ1	Mycophenolic acid acyl-glucuronide esterase, mitochondrial OS=Homo sapiens OX=9606 GN=ABHD10 PE=1 SV=1	ABHD10	ENSG00000144827.8	93	9	1.4934	0.00298255	1.04118e+07	1.05467e+07	1.24129e+07	9.58224e+06	8.36786e+06	6.8058e+06	6.32035e+06	7.22824e+06	9252118	8.71361e+06	1.07535e+07	7.92157e+06	293717	3.4137e+06	5.04404e+06	6.32035e+06	6.28118e+06	2.9508e+06	9	8	9	8	5	8	8	7	8	7	High	High	High	High	Peak Found	High	High	High	High	High	43	59.663	58.88
High	Q53EL6	Programmed cell death protein 4 OS=Homo sapiens OX=9606 GN=PDCD4 PE=1 SV=2	PDCD4	ENSG00000150593.17	14	4	2.14185	0.00300987	1.53057e+06	1.66239e+06	1.12985e+06	1.7914e+06	742692	691788	748064	958855	1.3601e+06	1.37346e+06	978807	1.48094e+06		302984	512710	748064	833224	199376	4	4	3	4		3	3	3	3	2	High	High	High	High	Not Found	High	Peak Found	Peak Found	Peak Found	Peak Found	13	16.372	4.88
High	Q9NTI5	Sister chromatid cohesion protein PDS5 homolog B OS=Homo sapiens OX=9606 GN=PDS5B PE=1 SV=1	PDS5B	ENSG00000083642.18	18	4	1.33507	0.00303005	1.30002e+06	1.46384e+06	1.49933e+06	1.38456e+06	1.03599e+06	1.04284e+06	1.09069e+06	1.23851e+06	1.15522e+06	1.20942e+06	1.29889e+06	1.1446e+06	9391.26	422637	772889	1.09069e+06	1.07624e+06	724285	4	4	4	4	1	4	3	4	4	4	Peak Found	High	High	High	Peak Found	High	Peak Found	High	High	High	4	13.882	0
High	O14732	Inositol monophosphatase 2 OS=Homo sapiens OX=9606 GN=IMPA2 PE=1 SV=1	IMPA2	ENSG00000141401.11	29	3	1.48875	0.00304306	3.02175e+06	3.15354e+06	3.03208e+06	3.14424e+06	2.6233e+06	1.74217e+06	2257620	1.89103e+06	2.68519e+06	2.60543e+06	2.62674e+06	2.59932e+06	97367.8	1.07019e+06	1.29119e+06	2257620	1.64327e+06	1.09289e+06	3	3	3	3	3	3	3	3	3	3	High	High	High	High	Peak Found	Peak Found	High	High	High	High	16	18.777	26.98
High	O94992	Protein HEXIM1 OS=Homo sapiens OX=9606 GN=HEXIM1 PE=1 SV=1	HEXIM1	ENSG00000186834.3	11	2	0.66421	0.0030739	938829	1.01815e+06	1.12904e+06	1.05951e+06	1.29937e+06	1.4727e+06	1.65531e+06	1.73885e+06	834262	841184	978110	875890		530085	1.09147e+06	1.65531e+06	1.51102e+06	60750.5	2	2	2	2		2	2	2	2	1	High	High	High	High	Not Found	Peak Found	High	High	High	Peak Found	9	10.424	7.49
High	P09884	DNA polymerase alpha catalytic subunit OS=Homo sapiens OX=9606 GN=POLA1 PE=1 SV=2	POLA1	ENSG00000101868.10	6	2	0.736157	0.00307529	429812	446641	562665	536792	660537	761363	675363	659175	381939	369011	487446	443762		269469	564276	675363	572809	448429	2	2	2	2		2	2	2	2	2	Peak Found	Peak Found	High	Peak Found	Not Found	High	Peak Found	High	High	High	1	4.175	0
High	Q99496	E3 ubiquitin-protein ligase RING2 OS=Homo sapiens OX=9606 GN=RNF2 PE=1 SV=1	RNF2	ENSG00000121481.10	13	2	0.82061	0.00312684	995886	1.12938e+06	1.02458e+06	1.0456e+06	1.25893e+06	1.17122e+06	1.33107e+06	1.2638e+06	884964	933089	887614	864390	28555.3	513588	868039	1.33107e+06	1.09822e+06	477691	2	2	2	2	1	2	2	2	2	2	Peak Found	High	High	High	Peak Found	High	High	High	High	Peak Found	7	7.291	2.5
High	P26038	Moesin OS=Homo sapiens OX=9606 GN=MSN PE=1 SV=3	MSN	ENSG00000147065.16	233	12	0.5293	0.00313806	7.51178e+06	9.20543e+06	8.63072e+06	7.92151e+06	1.54048e+07	1.67771e+07	1.58671e+07	1.09469e+07	6.67512e+06	7.60546e+06	7.47694e+06	6.54865e+06	1.12246e+06	6.28445e+06	1.24341e+07	1.58671e+07	9.51264e+06	5.54611e+06	9	9	8	7	2	12	11	12	11	11	Peak Found	High	High	High	Peak Found	High	High	High	High	High	39	83.76	161.42
High	P83731	60S ribosomal protein L24 OS=Homo sapiens OX=9606 GN=RPL24 PE=1 SV=1	RPL24	ENSG00000114391.12	182	5	0.807784	0.00317148	3.8736e+07	4.03495e+07	4.30995e+07	4.09769e+07	4.47011e+07	5.13417e+07	5.07243e+07	4.99541e+07	3.44216e+07	3.33365e+07	3.73378e+07	3.38753e+07	721942	1.8236e+07	3.80513e+07	5.07243e+07	4.3409e+07	1.73235e+07	7	7	7	7	5	7	6	7	7	6	High	High	High	High	Peak Found	High	High	High	High	High	31	33.137	180.11
High	P46776	60S ribosomal protein L27a OS=Homo sapiens OX=9606 GN=RPL27A PE=1 SV=2	RPL27A	ENSG00000166441.12	145	5	0.788177	0.00319235	4.46677e+07	4.62403e+07	5.07562e+07	5.1549e+07	5.47832e+07	6.2858e+07	6.07188e+07	6.23455e+07	3.96926e+07	3.82034e+07	4.3971e+07	4.26151e+07	1.18776e+06	2.2349e+07	4.65865e+07	6.07188e+07	5.41769e+07	2.16955e+07	5	5	5	5	4	5	5	5	5	5	High	High	High	High	High	High	High	High	High	High	28	24.04	195.7
High	P17568	NADH dehydrogenase [ubiquinone] 1 beta subcomplex subunit 7 OS=Homo sapiens OX=9606 GN=NDUFB7 PE=1 SV=4	NDUFB7	ENSG00000099795.6	21	2	1.21311	0.00323109	1.48529e+06	1.66119e+06	1.42036e+06	1.5043e+06	1.27585e+06	1.2083e+06	1.25611e+06	1.09318e+06	1.31986e+06	1.37247e+06	1.23048e+06	1.2436e+06		520488	895521	1.25611e+06	949952	666729	2	2	2	2		2	2	2	2	2	High	High	High	High	Not Found	High	High	High	High	High	14	7.822	14.78
High	Q9BUR5	MICOS complex subunit MIC26 OS=Homo sapiens OX=9606 GN=APOO PE=1 SV=1	APOO	ENSG00000184831.13	20	3	1.77115	0.00327282	2.87758e+06	3.34423e+06	3.41875e+06	3.31454e+06	1.3783e+06	1.88647e+06	1.8731e+06	2.58806e+06	2.55707e+06	2.76298e+06	2.96172e+06	2.74011e+06	71048	562285	1.39814e+06	1.8731e+06	2.24897e+06	1.13779e+06	3	3	3	3	2	2	3	2	3	2	High	High	High	High	Peak Found	High	High	High	High	High	18	12.447	19.65
High	Q13561	Dynactin subunit 2 OS=Homo sapiens OX=9606 GN=DCTN2 PE=1 SV=4	DCTN2	ENSG00000175203.15	51	10	0.707722	0.00328734	3.17236e+06	3.36222e+06	3.70812e+06	3.04868e+06	4.01979e+06	4.795e+06	5.0498e+06	4.43826e+06	2.81902e+06	2.77784e+06	3.21241e+06	2.52032e+06	187212	1.63989e+06	3.55376e+06	5.0498e+06	3.85675e+06	3.93778e+06	7	7	7	7	3	7	7	7	7	7	High	High	High	High	Peak Found	High	High	High	High	High	41	39.864	18.51
High	Q9BXS4	Transmembrane protein 59 OS=Homo sapiens OX=9606 GN=TMEM59 PE=1 SV=1	TMEM59	ENSG00000116209.11	9	3	1.58329	0.00332337	938995	1.1401e+06	1.32881e+06	1.01597e+06	631718	756891	670009	691755	834409	941940	1.15117e+06	839893	21442.5	257712	560961	670009	601120	314642	3	3	3	3	1	3	3	3	3	2	High	High	High	High	Peak Found	Peak Found	Peak Found	High	High	High	11	10.398	3.56
High	Q7L2E3	ATP-dependent RNA helicase DHX30 OS=Homo sapiens OX=9606 GN=DHX30 PE=1 SV=1	DHX30	ENSG00000132153.14	135	24	0.864677	0.00334546	1.67886e+07	1.91447e+07	1.97478e+07	1.85821e+07	2.18741e+07	2.18681e+07	2.1763e+07	2.11632e+07	1.49187e+07	1.58172e+07	1.71078e+07	1.53617e+07	299316	8.92362e+06	1.62073e+07	2.1763e+07	1.83904e+07	1.28217e+07	24	25	25	25	8	24	25	24	24	24	High	High	High	High	High	High	High	High	High	High	28	107.93	46.63
High	P11413	Glucose-6-phosphate 1-dehydrogenase OS=Homo sapiens OX=9606 GN=G6PD PE=1 SV=4	G6PD	ENSG00000160211.15	400	24	0.839116	0.00336173	7.53527e+07	8.73043e+07	8.26619e+07	8.24879e+07	9.11006e+07	9.7913e+07	1.00785e+08	9.89011e+07	6.69599e+07	7.21302e+07	7.16115e+07	6.81921e+07	2.13876e+06	3.71649e+07	7.25671e+07	1.00785e+08	8.59429e+07	5.12391e+07	28	28	27	27	15	27	27	26	27	27	High	High	High	High	Peak Found	High	High	High	High	High	63	159.685	428.61
High	P11279	Lysosome-associated membrane glycoprotein 1 OS=Homo sapiens OX=9606 GN=LAMP1 PE=1 SV=3	LAMP1	ENSG00000185896.10	51	5	0.818814	0.0033675	1.17357e+07	1.23255e+07	1.1774e+07	1.31229e+07	1.35217e+07	1.5227e+07	1.45244e+07	1.49077e+07	1.04286e+07	1.01832e+07	1.02e+07	1.08486e+07	198067	5.51625e+06	1.12853e+07	1.45244e+07	1.29545e+07	7.88752e+06	6	6	6	6	2	6	5	5	6	6	High	High	High	High	Peak Found	High	High	High	High	High	12	29.408	31.24
High	P52789	Hexokinase-2 OS=Homo sapiens OX=9606 GN=HK2 PE=1 SV=2	HK2	ENSG00000159399.9	119	21	0.626663	0.00341311	1.91153e+07	2.12626e+07	2.1183e+07	2.2617e+07	2.58702e+07	3.55853e+07	3.21475e+07	3.56711e+07	1.69863e+07	1.7567e+07	1.83512e+07	1.86973e+07	884668	1.05539e+07	2.63736e+07	3.21475e+07	3.09974e+07	1.99822e+07	20	21	20	19	8	21	21	21	21	21	High	High	High	High	Peak Found	High	High	High	High	High	31	83.641	68.57
High	P12814	Alpha-actinin-1 OS=Homo sapiens OX=9606 GN=ACTN1 PE=1 SV=2	ACTN1	ENSG00000072110.13	991	28	1.2072	0.00349284	7.49346e+07	8.30774e+07	8.75183e+07	7.54903e+07	6.6356e+07	6.45672e+07	6.71962e+07	6.4996e+07	6.65884e+07	6.86379e+07	7.58187e+07	6.24072e+07	1.0988e+06	2.70702e+07	4.78532e+07	6.71962e+07	5.64801e+07	3.66493e+07	32	31	32	31	15	32	32	31	31	32	High	High	High	High	Peak Found	High	High	High	High	High	66	351.22	1273.1
High	Q3LXA3	Triokinase/FMN cyclase OS=Homo sapiens OX=9606 GN=TKFC PE=1 SV=2	DAK; TKFC	ENSG00000149476.15	110	13	1.34232	0.00361231	9.13753e+06	1.12858e+07	1.10905e+07	1.06965e+07	8.34206e+06	7.24604e+06	7.88877e+06	8.42902e+06	8.11979e+06	9.32422e+06	9.60787e+06	8.84272e+06	105467	3.40318e+06	5.37032e+06	7.88877e+06	7.32464e+06	5.0743e+06	12	12	12	12	3	12	11	12	12	12	High	High	High	High	Peak Found	High	High	High	High	High	39	88.432	92
High	P61254	60S ribosomal protein L26 OS=Homo sapiens OX=9606 GN=RPL26 PE=1 SV=1	RPL26	ENSG00000161970.12	262	2	0.812453	0.00363553	6.80371e+06	7.98701e+06	8.45587e+06	8.15619e+06	9.55212e+06	9.39083e+06	1.04551e+07	1.03176e+07	6.04591e+06	6.5988e+06	7.32547e+06	6.74266e+06	18208.3	3.89683e+06	6.9599e+06	1.04551e+07	8.96574e+06	2.88196e+06	2	2	2	2	1	2	2	2	2	2	High	High	High	High	Peak Found	High	High	High	High	High	39	41.735	245.93
High	Q9HAN9	Nicotinamide/nicotinic acid mononucleotide adenylyltransferase 1 OS=Homo sapiens OX=9606 GN=NMNAT1 PE=1 SV=1	NMNAT1	ENSG00000173614.13	8	2	3.77598	0.00363601	362831	423822	485667	277615	230748	92359.9	100460	107871	322419	350158	420742	229502		94134.5	68451.5	100460	93737.3	165481	2	2	2	1		1	1	1	1	2	High	High	High	Peak Found	Not Found	Peak Found	High	Peak Found	Peak Found	Peak Found	8	5.239	3.25
High	P05141	ADP/ATP translocase 2 OS=Homo sapiens OX=9606 GN=SLC25A5 PE=1 SV=7	SLC25A5	ENSG00000005022.5	795	5	1.19036	0.00366317	7.17213e+07	7.994e+07	8.25124e+07	7.32372e+07	6.32668e+07	6.59529e+07	6.54143e+07	6.27962e+07	6.3733e+07	6.60458e+07	7.14819e+07	6.05447e+07	2.41725e+06	2.58099e+07	4.88802e+07	6.54143e+07	5.45685e+07	3.98554e+07	6	6	6	6	5	6	6	6	6	6	High	High	High	High	High	High	High	High	High	High	48	101.242	906.61
High	Q14444	Caprin-1 OS=Homo sapiens OX=9606 GN=CAPRIN1 PE=1 SV=2	CAPRIN1	ENSG00000135387.20	159	13	0.861968	0.00369805	2.32031e+07	2.47506e+07	2.50868e+07	2.42282e+07	2.7644e+07	3.08703e+07	2.91781e+07	2.70445e+07	2.06188e+07	2.04488e+07	2.17331e+07	2.00292e+07	242284	1.12775e+07	2.28791e+07	2.91781e+07	2.35011e+07	1.77918e+07	14	13	14	13	6	15	15	14	14	14	High	High	High	High	Peak Found	High	High	High	High	High	32	98.615	142.8
High	Q9BY44	Eukaryotic translation initiation factor 2A OS=Homo sapiens OX=9606 GN=EIF2A PE=1 SV=3	EIF2A	ENSG00000144895.11	136	15	0.855318	0.00372126	1.07331e+07	1.30587e+07	1.30563e+07	1.29326e+07	1.48122e+07	1.51021e+07	1.59009e+07	1.5283e+07	9.53762e+06	1.0789e+07	1.13109e+07	1.06913e+07	229621	6.0427e+06	1.11928e+07	1.59009e+07	1.32806e+07	8.58407e+06	15	16	14	15	6	15	15	16	15	15	High	High	High	High	Peak Found	High	High	High	High	High	35	65.284	93.03
High	Q96CT7	Coiled-coil domain-containing protein 124 OS=Homo sapiens OX=9606 GN=CCDC124 PE=1 SV=1	CCDC124	ENSG00000007080.10	22	2	0.82711	0.00377952	1.36676e+06	1.46435e+06	1.49169e+06	1.44233e+06	1.73517e+06	1.77909e+06	1.81606e+06	1.56457e+06	1.21453e+06	1.20983e+06	1.29228e+06	1.19236e+06	20492.9	707869	1.31855e+06	1.81606e+06	1.35958e+06	534253	2	2	2	2	1	2	2	2	2	2	High	High	High	High	Peak Found	High	High	High	High	High	10	8.344	11.39
High	P40429	60S ribosomal protein L13a OS=Homo sapiens OX=9606 GN=RPL13A PE=1 SV=2	RPL13A	ENSG00000142541.16	252	8	0.76086	0.00378915	6.09461e+07	6.16205e+07	6.95537e+07	6.52435e+07	7.19886e+07	8.44576e+07	8.22801e+07	8.50267e+07	5.41579e+07	50910358	6.02556e+07	5.39363e+07	1.80247e+06	2.9368e+07	6.25947e+07	8.22801e+07	7.38863e+07	4.51651e+07	10	10	10	10	8	10	10	10	10	10	High	High	High	High	High	High	High	High	High	High	38	42.851	305.94
High	P07305	Histone H1.0 OS=Homo sapiens OX=9606 GN=H1-0 PE=1 SV=3	H1F0	ENSG00000189060.5	53	4	0.754904	0.00379796	1.55511e+07	1.53375e+07	1.64315e+07	1.66139e+07	1.79914e+07	2.26009e+07	2.07548e+07	2.16116e+07	13818973	1.26717e+07	1.42349e+07	1.37346e+07	37783.3	7.33966e+06	1.67504e+07	2.07548e+07	1.878e+07	5.57757e+06	4	4	4	4	1	5	5	5	5	4	High	High	High	High	Peak Found	High	High	High	High	High	21	15.655	49.68
High	O43237	Cytoplasmic dynein 1 light intermediate chain 2 OS=Homo sapiens OX=9606 GN=DYNC1LI2 PE=1 SV=1	DYNC1LI2	ENSG00000135720.12	9	2	0.623632	0.00382228	385363	414730	326672	330851	707063	571819	495277	576637	342441	342647	283002	273512		288449	423797	495277	501085	234520	1	1	1	1		1	1	1	1	1	Peak Found	Peak Found	High	Peak Found	Not Found	High	High	Peak Found	High	Peak Found	9	10.962	1.67
High	Q5BJF2	Sigma intracellular receptor 2 OS=Homo sapiens OX=9606 GN=TMEM97 PE=1 SV=1	TMEM97	ENSG00000109084.13	17	2	1.41004	0.00392203	1.81972e+06	2.06437e+06	2.44474e+06	1.90632e+06	1.49255e+06	1.41786e+06	1.39815e+06	1.36899e+06	1.61704e+06	1.70557e+06	2.11792e+06	1.57594e+06	27679.1	608893	1.05083e+06	1.39815e+06	1.18962e+06	608661	2	2	2	2	1	2	2	2	2	2	High	High	High	High	Peak Found	High	High	High	High	High	10	5.287	14.96
High	Q99459	Cell division cycle 5-like protein OS=Homo sapiens OX=9606 GN=CDC5L PE=1 SV=2	CDC5L	ENSG00000096401.7	114	13	0.80639	0.00394588	7.18019e+06	8.22697e+06	7.1542e+06	7.44349e+06	1.03875e+07	9.03938e+06	9.04414e+06	9.09062e+06	6.38046e+06	6.79706e+06	6197808	6.15348e+06	145263	4.23761e+06	6.69943e+06	9.04414e+06	7.89955e+06	2.85425e+06	13	14	12	13	4	14	12	12	13	11	High	High	High	High	Peak Found	High	High	High	High	High	26	72.084	44.57
High	P13073	Cytochrome c oxidase subunit 4 isoform 1, mitochondrial OS=Homo sapiens OX=9606 GN=COX4I1 PE=1 SV=1	COX4I1	ENSG00000131143.8	106	5	1.25327	0.00395431	3.00023e+07	3.46535e+07	3.14765e+07	3.12508e+07	2.03942e+07	2.53006e+07	2.66073e+07	2.47503e+07	26660652	2.86304e+07	2.72687e+07	2.58348e+07	542624	8.3199e+06	1.87513e+07	2.66073e+07	2.15074e+07	14298667	6	6	6	6	3	6	6	6	6	6	High	High	High	High	High	High	High	High	High	High	34	25.231	119.74
High	P55010	Eukaryotic translation initiation factor 5 OS=Homo sapiens OX=9606 GN=EIF5 PE=1 SV=2	EIF5	ENSG00000100664.10	92	12	0.76734	0.0039636	8.94322e+06	1.057e+07	1.08282e+07	9.42471e+06	1.43189e+07	1.26362e+07	1.34209e+07	1.18914e+07	7.94712e+06	8.73284e+06	9.38066e+06	7.79134e+06	207266	5.84145e+06	9.3652e+06	1.34209e+07	1.03334e+07	3.46064e+06	12	12	12	12	7	12	12	12	12	10	High	High	High	High	Peak Found	High	High	High	High	High	31	46.912	36.34
High	P55060	Exportin-2 OS=Homo sapiens OX=9606 GN=CSE1L PE=1 SV=3	CSE1L	ENSG00000124207.16	412	35	0.780024	0.00398211	9.56568e+07	9.77232e+07	1.08547e+08	1.15798e+08	1.47421e+08	1.32208e+08	1.25609e+08	1.32232e+08	8.50026e+07	8.07382e+07	9.40359e+07	9.57292e+07	4.32173e+06	6.0141e+07	9.79845e+07	1.25609e+08	1.14907e+08	6.91228e+07	35	36	35	35	19	36	35	35	35	35	High	High	High	High	Peak Found	High	High	High	High	High	49	188.178	437.32
High	P62879	Guanine nucleotide-binding protein G(I)/G(S)/G(T) subunit beta-2 OS=Homo sapiens OX=9606 GN=GNB2 PE=1 SV=3	GNB2	ENSG00000172354.9	109	6	1.21868	0.0040587	9.28388e+06	1.03646e+07	1.07671e+07	1.03269e+07	8.71152e+06	8.02812e+06	8.92911e+06	8.26703e+06	8.24984e+06	8.56311e+06	9.32774e+06	8.53715e+06	205032	3.5539e+06	5.94995e+06	8.92911e+06	7.18387e+06	4.87303e+06	6	6	6	6	3	6	6	6	6	6	High	High	High	High	Peak Found	High	High	High	High	High	51	79.334	134.48
High	Q6P3W7	SCY1-like protein 2 OS=Homo sapiens OX=9606 GN=SCYL2 PE=1 SV=1	SCYL2	ENSG00000136021.18	2	2	0.667536	0.00405993	325984	276738	191647	330081	433014	448949	453957	554650	289676	228639	166027	272876		176650	332733	453957	481979	304691	2	1	1	2		2	2	2	2	2	Peak Found	Peak Found	Peak Found	Peak Found	Not Found	Peak Found	Peak Found	High	High	Peak Found	3	4.587	0
High	Q14671	Pumilio homolog 1 OS=Homo sapiens OX=9606 GN=PUM1 PE=1 SV=3	PUM1	ENSG00000134644.15	10	4	0.837445	0.00406428	947542	1.12594e+06	998847	1.0849e+06	1.19027e+06	1.25082e+06	1237403	1.26833e+06	842004	930241	865319	896881		485576	927030	1237403	1.10215e+06	304658	3	3	3	3		3	3	3	3	2	Peak Found	High	High	Peak Found	Not Found	High	High	High	High	High	4	9.643	0
High	Q9NQX7	Integral membrane protein 2C OS=Homo sapiens OX=9606 GN=ITM2C PE=1 SV=1	ITM2C	ENSG00000135916.15	11	2	1.72618	0.00410259	610983	834741	770017	621610	307017	446431	486663	359757	542931	689656	667079	513880		125249	330867	486663	312621	278958	2	2	2	2		1	2	2	2	2	High	High	High	High	Not Found	Peak Found	High	High	High	Peak Found	16	8.104	6.84
High	P61513	60S ribosomal protein L37a OS=Homo sapiens OX=9606 GN=RPL37A PE=1 SV=2	RPL37A	ENSG00000197756.9	89	4	0.885866	0.0041062	1.60414e+07	1.79995e+07	1.7956e+07	1.76834e+07	1.91736e+07	1.97173e+07	2.05138e+07	2.05172e+07	1.42547e+07	1.4871e+07	1.55556e+07	1.46187e+07	260875	7.82197e+06	1.46132e+07	2.05138e+07	1.7829e+07	6.72247e+06	4	4	4	4	3	4	4	4	4	4	High	High	High	High	Peak Found	High	High	High	High	High	51	25.122	106.98
High	P32119	Peroxiredoxin-2 OS=Homo sapiens OX=9606 GN=PRDX2 PE=1 SV=5	PRDX2	ENSG00000167815.11	362	10	1.2585	0.0041216	1.37055e+08	1.42559e+08	1.39111e+08	1.46086e+08	1.28523e+08	1.08592e+08	1.15221e+08	1.00703e+08	1.21789e+08	1.17781e+08	1.20514e+08	1.20768e+08	3.85395e+06	5.24314e+07	8.04819e+07	1.15221e+08	8.75091e+07	9.23977e+07	11	11	11	12	9	10	11	10	11	12	High	High	High	High	High	High	High	High	High	High	67	88.252	500.55
High	Q99543	DnaJ homolog subfamily C member 2 OS=Homo sapiens OX=9606 GN=DNAJC2 PE=1 SV=4	DNAJC2	ENSG00000105821.14	46	8	0.833424	0.0041292	3.19172e+06	3.56823e+06	3.68673e+06	3.27933e+06	4.33286e+06	4.21776e+06	3.99842e+06	3.91125e+06	2.83623e+06	2.94804e+06	3.19387e+06	2.711e+06	14822.6	1.76761e+06	3.12595e+06	3.99842e+06	3.39879e+06	1.83795e+06	7	7	7	6	1	7	7	7	6	7	High	High	High	High	Peak Found	High	High	High	High	High	16	24.422	21.65
High	P50995	Annexin A11 OS=Homo sapiens OX=9606 GN=ANXA11 PE=1 SV=1	ANXA11	ENSG00000122359.17	120	14	0.883408	0.00416293	1.07244e+07	1.10495e+07	1.10414e+07	1.12519e+07	1.23508e+07	1.19998e+07	1.26556e+07	1.36251e+07	9.52994e+06	9.12902e+06	9.56536e+06	9.30189e+06	340703	5.03858e+06	8.89348e+06	1.26556e+07	1.18399e+07	7.48229e+06	14	13	14	14	7	13	13	14	14	14	High	High	High	High	Peak Found	High	High	High	High	High	32	69.743	86.82
High	P09622	Dihydrolipoyl dehydrogenase, mitochondrial OS=Homo sapiens OX=9606 GN=DLD PE=1 SV=2	DLD	ENSG00000091140.13	130	15	1.36358	0.00425107	2.12608e+07	2.29957e+07	2.34894e+07	2.24394e+07	1.67929e+07	1.65276e+07	2.05118e+07	1.5961e+07	1.88927e+07	1.89989e+07	2.03493e+07	1.85505e+07	287566	6.85072e+06	1.22493e+07	2.05118e+07	1.38698e+07	7.53875e+06	14	15	15	15	8	13	13	15	14	14	High	High	High	High	Peak Found	High	High	High	High	High	52	92.237	150.52
High	Q56VL3	OCIA domain-containing protein 2 OS=Homo sapiens OX=9606 GN=OCIAD2 PE=1 SV=1	OCIAD2	ENSG00000145247.11	51	5	0.823471	0.00428558	6.14913e+06	7.5416e+06	7.46321e+06	6.7732e+06	8.16594e+06	8.62892e+06	8.65936e+06	8.82423e+06	5.46424e+06	6.23081e+06	6.46551e+06	5.59935e+06	140934	3.33133e+06	6.39523e+06	8.65936e+06	7.66806e+06	4.94078e+06	5	5	5	5	4	5	5	5	5	5	High	High	High	High	Peak Found	High	High	High	High	High	32	22.198	41.63
High	Q9HAW8	UDP-glucuronosyltransferase 1-10 OS=Homo sapiens OX=9606 GN=UGT1A10 PE=1 SV=1	UGT1A10	ENSG00000242515.5	93	3	0.128503	0.00428677	149370	182723		196266	1.88573e+06	1.12247e+06	1.01962e+06	1.72139e+06	132733	150964		162251		769290	831907	1.01962e+06	1.49585e+06	1.13652e+06	1	1		1		2	3	2	3	3	Peak Found	Peak Found	Not Found	Peak Found	Not Found	High	Peak Found	High	High	High	30	65.738	80.52
High	P33993	DNA replication licensing factor MCM7 OS=Homo sapiens OX=9606 GN=MCM7 PE=1 SV=4	MCM7	ENSG00000166508.17	334	26	0.863077	0.00430313	4.62607e+07	5.09146e+07	4.67329e+07	5.09369e+07	6.12834e+07	5.75638e+07	5.55749e+07	5.48322e+07	4.11082e+07	4.20652e+07	4.04855e+07	4.21091e+07	1.41708e+06	2.50008e+07	4.26627e+07	5.55749e+07	4.7648e+07	3.48058e+07	27	27	25	27	17	27	27	26	25	26	High	High	High	High	High	High	High	High	High	High	53	177.403	379.55
High	P62495	Eukaryotic peptide chain release factor subunit 1 OS=Homo sapiens OX=9606 GN=ETF1 PE=1 SV=3	ETF1	ENSG00000120705.12	156	16	0.806793	0.00432436	1.40838e+07	1.70597e+07	1.72508e+07	1.522e+07	2.02621e+07	1.85797e+07	2.02315e+07	1.97783e+07	1.25151e+07	1.40946e+07	1.49446e+07	1.25822e+07	328846	8.26599e+06	1.37701e+07	2.02315e+07	1.71869e+07	1.13412e+07	14	15	15	15	7	15	15	15	15	15	High	High	High	High	Peak Found	High	High	High	High	High	54	88.15	103.21
High	Q969V3	Nicalin OS=Homo sapiens OX=9606 GN=NCLN PE=1 SV=2	NCLN	ENSG00000125912.10	30	6	0.792039	0.00442069	1.45056e+06	1.92714e+06	1.70801e+06	1.89742e+06	2.15559e+06	2.36189e+06	2.26424e+06	2.28785e+06	1.289e+06	1.59219e+06	1.47968e+06	1.56858e+06	14168.5	879380	1.75048e+06	2.26424e+06	1988094	1.37105e+06	4	5	4	5	1	5	5	5	5	5	High	High	High	High	Peak Found	High	High	High	High	High	13	22.701	4.3
High	P12532	Creatine kinase U-type, mitochondrial OS=Homo sapiens OX=9606 GN=CKMT1A PE=1 SV=1	CKMT1B; CKMT1A	ENSG00000223572.9; ENSG00000237289.9	227	15	1.36016	0.00444115	3.38255e+07	3.95612e+07	4.02812e+07	3.1811e+07	2.71602e+07	2.34355e+07	2.74507e+07	2.67941e+07	3.0058e+07	3.26852e+07	3.48963e+07	2.62979e+07	928367	1.10801e+07	1.7369e+07	2.74507e+07	2.32835e+07	1.24962e+07	16	16	16	16	10	15	15	16	16	16	High	High	High	High	High	High	High	High	High	High	47	117.944	235.73
High	P56182	Ribosomal RNA processing protein 1 homolog A OS=Homo sapiens OX=9606 GN=RRP1 PE=1 SV=1	RRP1	ENSG00000160214.12	14	4	0.655197	0.00449342	934427	719543	876333	1.01809e+06	1.1183e+06	1.39089e+06	1.3728e+06	1.51905e+06	830351	594481	759182	841649	25922.1	456215	1.03084e+06	1.3728e+06	1.32002e+06	415430	3	3	3	3	1	3	4	3	4	3	High	High	High	High	Peak Found	High	High	Peak Found	High	Peak Found	10	11.898	0
High	O95861	3'(2'),5'-bisphosphate nucleotidase 1 OS=Homo sapiens OX=9606 GN=BPNT1 PE=1 SV=1	BPNT1	ENSG00000162813.17	58	11	1.16621	0.004511	8.50746e+06	8.73185e+06	8.65031e+06	8.11623e+06	7.08695e+06	7.03148e+06	7.62544e+06	7.88106e+06	7.5599e+06	7.21419e+06	7.49391e+06	6.70962e+06	140572	2.89115e+06	5.2113e+06	7.62544e+06	6.84847e+06	4.25529e+06	12	11	10	11	4	11	10	11	11	11	High	High	High	High	Peak Found	High	High	High	High	High	51	44.616	21.13
High	P11234	Ras-related protein Ral-B OS=Homo sapiens OX=9606 GN=RALB PE=1 SV=1	RALB	ENSG00000144118.13	49	3	0.880271	0.00453561	955052	1.00104e+06	1.04674e+06	1.06856e+06	1.10493e+06	1.17897e+06	1.1492e+06	1.17711e+06	848678	827054	906811	883370	31658	450759	873783	1.1492e+06	1.02288e+06	717743	3	3	3	3	1	3	3	3	3	3	High	High	High	High	Peak Found	High	High	High	High	High	43	37.804	13.67
High	P16615	Sarcoplasmic/endoplasmic reticulum calcium ATPase 2 OS=Homo sapiens OX=9606 GN=ATP2A2 PE=1 SV=1	ATP2A2	ENSG00000174437.16	340	29	0.854706	0.00459006	4.00901e+07	4.80451e+07	4.49556e+07	4.33039e+07	5.06931e+07	5.11966e+07	5.20664e+07	5.2408e+07	3.56249e+07	3.96945e+07	3.89458e+07	3.5799e+07	901052	2.06805e+07	3.79438e+07	5.20664e+07	4.55414e+07	2.79205e+07	31	30	31	31	13	30	31	30	31	29	High	High	High	High	High	High	High	High	High	High	38	166.757	342.69
High	O15397	Importin-8 OS=Homo sapiens OX=9606 GN=IPO8 PE=1 SV=2	IPO8	ENSG00000133704.9	47	11	1.5752	0.00460227	3.38046e+06	4.1886e+06	4.06887e+06	3.49987e+06	2.90932e+06	1.89034e+06	2.10068e+06	2.70427e+06	3.00394e+06	3.46059e+06	3.52494e+06	2.89331e+06	41843.1	1.18687e+06	1.401e+06	2.10068e+06	2.34995e+06	1.17033e+06	8	9	9	8	2	7	7	7	8	7	High	High	High	High	Peak Found	High	High	High	High	Peak Found	16	42.94	18.28
High	P36776	Lon protease homolog, mitochondrial OS=Homo sapiens OX=9606 GN=LONP1 PE=1 SV=2	LONP1	ENSG00000196365.11	299	29	1.32304	0.00463686	3.54004e+07	4.25392e+07	4.37802e+07	4.02589e+07	3.38124e+07	2.93233e+07	3.15398e+07	3.10418e+07	31457495	3.51456e+07	3.79275e+07	3.32817e+07	933332	1.37939e+07	2.17326e+07	3.15398e+07	2.69747e+07	1.83718e+07	27	30	32	30	18	25	25	27	28	28	High	High	High	High	Peak Found	High	High	High	High	High	47	177.773	255.47
High	P48651	Phosphatidylserine synthase 1 OS=Homo sapiens OX=9606 GN=PTDSS1 PE=1 SV=1	PTDSS1	ENSG00000156471.12	5	2	0.849439	0.00472371	522468	526872	592753	539039	627464	627376	615524	674451	464275	435297	513512	445619	200542	255977	464972	615524	586083	131611	2	2	2	2	1	2	2	2	2	1	Peak Found	Peak Found	Peak Found	Peak Found	Peak Found	Peak Found	High	High	High	Peak Found	6	5.455	0
High	Q9BR76	Coronin-1B OS=Homo sapiens OX=9606 GN=CORO1B PE=1 SV=1	CORO1B	ENSG00000172725.13	211	14	1.13292	0.00472851	4.15978e+07	4.59499e+07	4.52359e+07	4.40247e+07	3.98863e+07	3.81865e+07	4.06521e+07	3.89015e+07	3.69646e+07	3.79635e+07	3.91887e+07	3.63949e+07	684480	1.62718e+07	2.83015e+07	4.06521e+07	3.38045e+07	1.17375e+07	16	16	16	17	10	16	15	17	16	17	High	High	High	High	Peak Found	High	High	High	High	High	48	105.618	240.62
High	Q5QNW6	Histone H2B type 2-F OS=Homo sapiens OX=9606 GN=H2BC18 PE=1 SV=3	HIST2H2BF	ENSG00000203814.6	1041	4	0.794083	0.0047724	3.54836e+08	3.70725e+08	3.9427e+08	4.30466e+08	4.99789e+08	4.86623e+08	4.43107e+08	4.76745e+08	3.15314e+08	3.0629e+08	3.41563e+08	3.55863e+08	1.16198e+07	2.03891e+08	3.60655e+08	4.43107e+08	4.14281e+08	1.71887e+08	9	10	10	10	6	9	9	9	10	9	High	High	High	High	High	High	High	High	High	High	35	80.998	1469.34
High	Q9BZX2	Uridine-cytidine kinase 2 OS=Homo sapiens OX=9606 GN=UCK2 PE=1 SV=1	UCK2	ENSG00000143179.14	27	5	0.736969	0.00478025	2.42896e+06	2.24246e+06	2.5785e+06	1.58258e+06	3.13488e+06	3.18581e+06	3.15288e+06	3.19385e+06	2.15842e+06	1.8527e+06	2.2338e+06	1.30831e+06		1.27889e+06	2.36112e+06	3.15288e+06	2.77538e+06	1.58876e+06	5	5	5	4		5	5	5	5	5	High	High	High	High	Not Found	High	High	High	High	High	24	17.511	10.67
High	P62854	40S ribosomal protein S26 OS=Homo sapiens OX=9606 GN=RPS26 PE=1 SV=3	RPS26; LOC101929876; RPS26P25	ENSG00000197728.9	77	3	0.753496	0.00481212	2.15439e+07	2.4117e+07	2.29706e+07	2.45067e+07	2.62533e+07	3.23696e+07	30122540	3.26918e+07	1.91444e+07	1.99253e+07	1.98998e+07	20259485	323214	10710132	2.39904e+07	30122540	2.84084e+07	1.39599e+07	3	3	3	3	1	3	3	3	3	3	High	High	High	High	High	High	High	High	High	High	31	16.821	130.39
High	P11021	Endoplasmic reticulum chaperone BiP OS=Homo sapiens OX=9606 GN=HSPA5 PE=1 SV=2	HSPA5	ENSG00000044574.7	844	26	0.825273	0.00482673	1.29702e+08	1.49394e+08	1.36903e+08	1.43546e+08	1.53503e+08	1.71309e+08	1.72327e+08	1.68516e+08	1.15256e+08	1.23428e+08	1.18602e+08	1.18668e+08	2.25104e+06	6.26221e+07	1.26964e+08	1.72327e+08	1.46437e+08	7.17375e+07	27	27	27	27	22	27	27	27	27	26	High	High	High	High	High	High	High	High	High	High	60	255.129	1162.58
High	Q8NFV4	Protein ABHD11 OS=Homo sapiens OX=9606 GN=ABHD11 PE=1 SV=1	ABHD11	ENSG00000106077.18	44	4	1.21662	0.00486157	2.81842e+06	3.29532e+06	3.1239e+06	2.76913e+06	2.40186e+06	2.48596e+06	2.48245e+06	2.24131e+06	2.5045e+06	2.72256e+06	2.70629e+06	2.28922e+06	75227.1	979847	1.84244e+06	2.48245e+06	1.94765e+06	855153	5	5	5	5	3	5	5	5	5	5	High	High	High	High	Peak Found	High	High	High	High	High	17	18.165	29.3
High	P61247	40S ribosomal protein S3a OS=Homo sapiens OX=9606 GN=RPS3A PE=1 SV=2	RPS3A	ENSG00000145425.9	494	12	0.862354	0.00489539	1.29151e+08	1.39819e+08	1.42829e+08	1.3969e+08	1.49765e+08	1.6611e+08	1.58013e+08	1.69058e+08	1.14766e+08	1.15517e+08	1.23735e+08	1.1548e+08	2.98908e+06	6.10971e+07	1.2311e+08	1.58013e+08	1.46907e+08	6.97139e+07	19	19	18	19	12	18	19	19	18	19	High	High	High	High	High	High	High	High	High	High	49	113.248	470.03
High	O43674	NADH dehydrogenase [ubiquinone] 1 beta subcomplex subunit 5, mitochondrial OS=Homo sapiens OX=9606 GN=NDUFB5 PE=1 SV=1	NDUFB5	ENSG00000136521.12	28	2	1.34642	0.00494696	3.15541e+06	3.51166e+06	3.34756e+06	2.85969e+06	2.47357e+06	2.72967e+06	2356269	2.1845e+06	2.80396e+06	2.90131e+06	2.90005e+06	2.36408e+06	49020.2	1.0091e+06	2.02307e+06	2356269	1.89829e+06	1.4287e+06	2	2	2	2	1	2	2	2	2	2	High	High	High	High	Peak Found	High	High	High	High	High	11	10.678	18.48
High	P15559	NAD(P)H dehydrogenase [quinone] 1 OS=Homo sapiens OX=9606 GN=NQO1 PE=1 SV=1	NQO1	ENSG00000181019.12	694	14	0.677073	0.00494818	2.19735e+08	2.58019e+08	2.47663e+08	2.5623e+08	2.85583e+08	3.84714e+08	3.60109e+08	3.84115e+08	1.95261e+08	2.13173e+08	2.14555e+08	2.11823e+08	5.96787e+06	1.16505e+08	2.85126e+08	3.60109e+08	3.33787e+08	2.23922e+08	18	17	19	18	13	17	15	19	18	18	High	High	High	High	High	High	High	High	High	High	64	133.872	774.92
High	P54753	Ephrin type-B receptor 3 OS=Homo sapiens OX=9606 GN=EPHB3 PE=1 SV=2	EPHB3	ENSG00000182580.2	177	18	1.28913	0.00497488	1.50289e+07	1.75301e+07	1.68058e+07	1.71856e+07	1.41215e+07	1.12852e+07	1.38171e+07	1.25506e+07	1.3355e+07	1.44833e+07	1.45591e+07	1.42072e+07	256415	5.76091e+06	8.36388e+06	1.38171e+07	1.09062e+07	8.00405e+06	19	19	19	19	7	18	16	18	18	19	High	High	High	High	Peak Found	High	High	High	High	High	31	106.579	127.81
High	Q13951	Core-binding factor subunit beta OS=Homo sapiens OX=9606 GN=CBFB PE=1 SV=2	CBFB	ENSG00000067955.13	11	3	1.58137	0.00508451	639519	654973	837677	834644	472836	552094	415628	469141	568289	541134	725694	689994		192895	409178	415628	407673	150310	2	2	2	2		2	2	2	2	2	High	High	High	High	Not Found	Peak Found	High	High	Peak Found	Peak Found	19	17.224	2.05
High	O75369	Filamin-B OS=Homo sapiens OX=9606 GN=FLNB PE=1 SV=2	FLNB	ENSG00000136068.14	943	86	0.888624	0.00510321	1.24523e+08	1.37803e+08	1.42018e+08	1.35448e+08	1.48209e+08	1.53946e+08	1.53552e+08	1.59504e+08	1.10654e+08	1.13851e+08	1.23033e+08	1.11974e+08	2.1415e+06	6.04625e+07	1.14096e+08	1.53552e+08	1.38605e+08	9.14817e+07	84	87	85	86	43	88	88	86	88	88	High	High	High	High	High	High	High	High	High	High	58	594.728	963.68
High	P56470	Galectin-4 OS=Homo sapiens OX=9606 GN=LGALS4 PE=1 SV=1	LGALS4	ENSG00000282992.1; ENSG00000171747.8	275	11	0.826687	0.00510628	5.51385e+07	5.44087e+07	5.41819e+07	5.84842e+07	6.28045e+07	6.44427e+07	6.80707e+07	7.44372e+07	4.89971e+07	4.4952e+07	4.69388e+07	4.83485e+07	1.24961e+06	2.56214e+07	4.77609e+07	6.80707e+07	6.46843e+07	4.61219e+07	15	14	15	14	12	14	14	14	14	14	High	High	High	High	High	High	High	High	High	High	45	93.725	290.52
High	Q16643	Drebrin OS=Homo sapiens OX=9606 GN=DBN1 PE=1 SV=4	DBN1	ENSG00000113758.13	16	7	1.95475	0.00512502	1.59717e+06	2.59547e+06	2.25224e+06	2.06186e+06	930649	1.36169e+06	965064	1.24192e+06	1.41928e+06	2.14436e+06	1.95116e+06	1.70452e+06		379662	1.0092e+06	965064	1.0792e+06	400130	5	6	6	5		4	4	4	4	2	High	High	High	High	Not Found	High	Peak Found	High	High	High	21	20.041	4.38
High	P62191	26S proteasome regulatory subunit 4 OS=Homo sapiens OX=9606 GN=PSMC1 PE=1 SV=1	PSMC1	ENSG00000100764.13	186	14	0.899162	0.00513004	3.31708e+07	3.46578e+07	3.5815e+07	3.61554e+07	3.82723e+07	3.76458e+07	4.06116e+07	4.01038e+07	2.94762e+07	2.8634e+07	3.10272e+07	2.98894e+07	835656	1.56133e+07	2.79008e+07	4.06116e+07	3.48494e+07	2.41542e+07	15	14	14	14	10	14	14	15	15	14	High	High	High	High	Peak Found	High	High	High	High	High	50	88.908	181.69
High	Q8TD30	Alanine aminotransferase 2 OS=Homo sapiens OX=9606 GN=GPT2 PE=1 SV=1	GPT2	ENSG00000166123.13	16	3	0.575195	0.00517383	329863	375150	473881	295418	578004	647690	678514	505806	293123	309946	410531	244220		235799	480028	678514	439534	222666	2	2	2	2		2	2	2	2	2	High	High	High	High	Not Found	High	High	High	High	High	7	10.364	2.05
High	P40926	Malate dehydrogenase, mitochondrial OS=Homo sapiens OX=9606 GN=MDH2 PE=1 SV=3	MDH2	ENSG00000146701.11	674	16	1.20714	0.00521005	2.04885e+08	2.28026e+08	2.30416e+08	2.10991e+08	1.85832e+08	1.77852e+08	1.97932e+08	1.77761e+08	1.82065e+08	1.88393e+08	1.99613e+08	1.74425e+08	5.54181e+06	7.58111e+07	1.31813e+08	1.97932e+08	1.5447e+08	8.6963e+07	19	20	20	20	16	19	20	20	20	21	High	High	High	High	High	High	High	High	High	High	62	168.597	1025.51
High	P78527	DNA-dependent protein kinase catalytic subunit OS=Homo sapiens OX=9606 GN=PRKDC PE=1 SV=3	PRKDC	ENSG00000253729.7	1121	116	1.16857	0.00522387	1.55727e+08	1.71198e+08	1.72273e+08	1.67964e+08	1.53615e+08	1.38694e+08	1.43129e+08	1.47109e+08	1.38382e+08	1.41443e+08	1.49243e+08	1.38855e+08	4.16034e+06	6.26678e+07	1.02791e+08	1.43129e+08	1.27834e+08	8.65522e+07	112	109	109	110	73	108	109	109	108	109	High	High	High	High	High	High	High	High	High	High	38	630.647	1062.67
High	O75390	Citrate synthase, mitochondrial OS=Homo sapiens OX=9606 GN=CS PE=1 SV=2	CS	ENSG00000062485.18	191	12	1.17516	0.00529864	3.22018e+07	3.5209e+07	3.79062e+07	3.33823e+07	2.9734e+07	2.70865e+07	2.88777e+07	2.94897e+07	2.86151e+07	2.90894e+07	3.28388e+07	2.75969e+07	895315	1.21301e+07	2.00749e+07	2.88777e+07	2.56259e+07	1.7281e+07	10	10	12	11	8	11	10	11	11	11	High	High	High	High	High	High	High	High	High	High	44	79.796	216.68
High	Q8IZL8	Proline-, glutamic acid- and leucine-rich protein 1 OS=Homo sapiens OX=9606 GN=PELP1 PE=1 SV=2	PELP1	ENSG00000141456.14	13	7	0.586912	0.00532326	1.03561e+06	797392	1.23008e+06	979235	2.29203e+06	1.55315e+06	1.61134e+06	1.82162e+06	920266	658799	1.06564e+06	809526		935043	1.1511e+06	1.61134e+06	1.58295e+06	1.04681e+06	6	4	6	5		6	6	6	6	6	Peak Found	Peak Found	High	Peak Found	Not Found	High	High	High	High	High	11	23.599	0
High	Q13813	Spectrin alpha chain, non-erythrocytic 1 OS=Homo sapiens OX=9606 GN=SPTAN1 PE=1 SV=3	SPTAN1	ENSG00000197694.15	1411	118	1.1864	0.00532838	2.91015e+08	3.33703e+08	3.29731e+08	3.24971e+08	2.65563e+08	2.83732e+08	2.76424e+08	2.75414e+08	2.58602e+08	2.75703e+08	2.85652e+08	2.68651e+08	1.88685e+07	1.08338e+08	2.10285e+08	2.76424e+08	2.39328e+08	9.47327e+07	118	119	120	119	64	118	118	118	118	111	High	High	High	High	High	High	High	High	High	High	61	744.908	1652.5
High	Q14165	Malectin OS=Homo sapiens OX=9606 GN=MLEC PE=1 SV=1	MLEC	ENSG00000110917.7	74	7	0.868624	0.00537402	1.57805e+07	1.81899e+07	1.67917e+07	1.74221e+07	1.91115e+07	1.9505e+07	1.98834e+07	2.115e+07	1.40229e+07	1.50284e+07	1.45469e+07	1.44027e+07	214096	7.7966e+06	1.44559e+07	1.98834e+07	18378847	1.15028e+07	7	7	7	7	4	7	7	7	7	7	High	High	High	High	Peak Found	High	High	High	High	High	30	42.352	62.36
High	Q99797	Mitochondrial intermediate peptidase OS=Homo sapiens OX=9606 GN=MIPEP PE=1 SV=2	MIPEP	ENSG00000027001.9	32	8	1.45434	0.00537668	3.11582e+06	3.85732e+06	3.55451e+06	3.69323e+06	2.9263e+06	1.9486e+06	2.43833e+06	2.54521e+06	2.76878e+06	3.18689e+06	3.07933e+06	3.05317e+06	21316.7	1.1938e+06	1.44418e+06	2.43833e+06	2.21173e+06	1.21589e+06	7	8	7	7	1	6	6	7	7	6	High	High	High	High	Peak Found	High	High	High	High	High	17	28.639	13.28
High	O95747	Serine/threonine-protein kinase OSR1 OS=Homo sapiens OX=9606 GN=OXSR1 PE=1 SV=1	OXSR1	ENSG00000172939.8	34	7	0.809288	0.00538355	2.04326e+06	2.39267e+06	2.06184e+06	2.0682e+06	2.6423e+06	2.57885e+06	2.43306e+06	2.52446e+06	1.81568e+06	1.9768e+06	1.78621e+06	1.70977e+06		1.07794e+06	1.91128e+06	2.43306e+06	2.1937e+06	1.41907e+06	7	7	7	7		7	6	7	7	7	High	High	High	High	Not Found	High	High	High	High	High	22	27.555	12.92
High	Q14566	DNA replication licensing factor MCM6 OS=Homo sapiens OX=9606 GN=MCM6 PE=1 SV=1	MCM6	ENSG00000076003.4	335	32	0.877405	0.00539757	4.24224e+07	4.85436e+07	4.86986e+07	4.59753e+07	5.3598e+07	5.13149e+07	5.52824e+07	5.41274e+07	3.76974e+07	4.01063e+07	4.21884e+07	3.80074e+07	903046	2.18655e+07	3.80314e+07	5.52824e+07	4.70356e+07	2.88586e+07	32	32	33	32	18	33	32	32	32	32	High	High	High	High	High	High	High	High	High	High	50	170.97	359.54
High	P53041	Serine/threonine-protein phosphatase 5 OS=Homo sapiens OX=9606 GN=PPP5C PE=1 SV=1	PPP5C	ENSG00000011485.14	58	7	1.40679	0.00548587	6.01993e+06	7.12076e+06	7.38671e+06	6.36146e+06	4.59618e+06	4.98749e+06	5.0783e+06	3.24507e+06	5.34943e+06	5.88312e+06	6.39923e+06	5.25897e+06		1.87503e+06	3.69642e+06	5.0783e+06	2.8199e+06	2.02527e+06	7	7	7	7		7	6	7	5	6	High	High	High	High	Not Found	High	High	High	High	High	17	38.218	44.51
High	Q9H3R2	Mucin-13 OS=Homo sapiens OX=9606 GN=MUC13 PE=1 SV=3	MUC13	ENSG00000173702.7	24	6	1.70122	0.0055164	5.8098e+06	6.4012e+06	7.40865e+06	5.08472e+06	4.60182e+06	3.68574e+06	3.44141e+06	3.49204e+06	5.1627e+06	5.28862e+06	6.41824e+06	4.20349e+06	33450.5	1.87733e+06	2.73164e+06	3.44141e+06	3.03451e+06	1.93961e+06	6	6	6	5	1	7	6	6	6	5	High	High	High	High	Peak Found	High	High	High	High	High	21	29.906	19.74
High	Q14244	Ensconsin OS=Homo sapiens OX=9606 GN=MAP7 PE=1 SV=1	MAP7	ENSG00000135525.18	45	9	0.8627	0.00552907	1.76571e+07	1.97739e+07	2.06118e+07	2.15608e+07	2.31801e+07	2.4042e+07	2.32947e+07	2.35184e+07	1.56905e+07	1.6337e+07	1.78564e+07	1.78241e+07	581765	9.45642e+06	1.78185e+07	2.32947e+07	2.0437e+07	1.04151e+07	8	9	9	9	7	9	9	9	9	8	High	High	High	High	Peak Found	High	High	High	High	High	13	26.524	28.35
High	Q7L1Q6	Basic leucine zipper and W2 domain-containing protein 1 OS=Homo sapiens OX=9606 GN=BZW1 PE=1 SV=1	BZW1	ENSG00000082153.17	40	5	0.805882	0.00560149	9.98189e+06	1.04462e+07	8.96886e+06	1.02475e+07	1.12846e+07	1.3503e+07	1.31242e+07	1.1978e+07	8.87011e+06	8.63056e+06	7.76988e+06	8.47153e+06	226278	4.60362e+06	1.00076e+07	1.31242e+07	1.04086e+07	6.34707e+06	5	4	4	5	3	3	4	4	4	3	High	High	High	High	Peak Found	High	High	High	High	High	23	37.812	28.69
High	Q04917	14-3-3 protein eta OS=Homo sapiens OX=9606 GN=YWHAH PE=1 SV=4	YWHAH	ENSG00000128245.14	664	9	0.793681	0.00566457	2.52136e+07	2.98772e+07	2.84412e+07	2.78145e+07	3.12391e+07	3.66675e+07	3.69895e+07	3.4212e+07	2.24053e+07	2.46843e+07	2.46391e+07	2.2994e+07	438479	1.27441e+07	2.71757e+07	3.69895e+07	2.97295e+07	1.82194e+07	10	10	10	10	8	10	10	10	10	10	High	High	High	High	Peak Found	High	High	High	High	High	58	83.87	674.88
High	O15372	Eukaryotic translation initiation factor 3 subunit H OS=Homo sapiens OX=9606 GN=EIF3H PE=1 SV=1	EIF3H	ENSG00000147677.10	137	14	0.809088	0.00572091	1.82797e+07	2.31163e+07	2.04641e+07	1.99506e+07	2.49509e+07	2.4099e+07	2.64183e+07	2.5e+07	1.62437e+07	1.90985e+07	1.77284e+07	1.6493e+07	332264	1.01788e+07	1.78607e+07	2.64183e+07	2.17245e+07	1.28101e+07	14	14	14	14	7	14	14	14	14	14	High	High	High	High	Peak Found	High	High	High	High	High	57	89.303	106.03
High	O95394	Phosphoacetylglucosamine mutase OS=Homo sapiens OX=9606 GN=PGM3 PE=1 SV=1	PGM3	ENSG00000013375.15	47	11	1.26249	0.00579234	7.16346e+06	7.13018e+06	7.68509e+06	7.74023e+06	5.84746e+06	5.80832e+06	5.91385e+06	6.91795e+06	6.36559e+06	5.8909e+06	6.65773e+06	6.39879e+06	1.40785e+06	2.3855e+06	4.30477e+06	5.91385e+06	6.01155e+06	4.02588e+06	10	9	10	9	4	8	8	8	9	9	High	High	High	High	Peak Found	High	High	High	High	High	28	49.987	24.11
High	Q99567	Nuclear pore complex protein Nup88 OS=Homo sapiens OX=9606 GN=NUP88 PE=1 SV=2	NUP88	ENSG00000108559.11	27	7	0.775618	0.00583052	1.73027e+06	2.15289e+06	1.65403e+06	1.98294e+06	2.44157e+06	2.34584e+06	2.4913e+06	2.29808e+06	1.53755e+06	1.7787e+06	1.43292e+06	1.63928e+06	15495.6	996050	1.73859e+06	2.4913e+06	1.99698e+06	1.26307e+06	6	6	5	6	1	6	6	6	6	6	High	High	High	High	Peak Found	High	High	High	High	High	14	28.01	16.36
High	Q9Y2Q3	Glutathione S-transferase kappa 1 OS=Homo sapiens OX=9606 GN=GSTK1 PE=1 SV=3	GSTK1	ENSG00000197448.13	50	7	1.34033	0.00583632	1.01661e+07	1.15466e+07	1.18589e+07	9.43381e+06	6.85686e+06	7.88564e+06	8.31377e+06	8.53565e+06	9.03378e+06	9.53968e+06	1.02736e+07	7.79886e+06	104570	2.79729e+06	5.84435e+06	8.31377e+06	7.41729e+06	4.15938e+06	7	7	7	7	1	7	7	7	7	7	High	High	High	High	Peak Found	High	High	High	High	High	44	32.078	34.35
High	Q15029	116 kDa U5 small nuclear ribonucleoprotein component OS=Homo sapiens OX=9606 GN=EFTUD2 PE=1 SV=1	EFTUD2	ENSG00000108883.12	250	28	0.868432	0.00584984	3.06087e+07	3.46398e+07	3.35933e+07	3.50746e+07	4.12336e+07	3.6796e+07	3.94881e+07	3.90823e+07	2.71995e+07	2.86191e+07	2.91024e+07	2.89959e+07	427019	1.68214e+07	2.7271e+07	3.94881e+07	3.39616e+07	2.19099e+07	27	27	27	27	8	27	27	27	27	27	High	High	High	High	Peak Found	High	High	High	High	High	41	148.495	211
High	P48509	CD151 antigen OS=Homo sapiens OX=9606 GN=CD151 PE=1 SV=3	CD151	ENSG00000177697.17	45	4	1.3013	0.00604281	6.11669e+06	7.88792e+06	7.29406e+06	7.1312e+06	5.11822e+06	5.71163e+06	5.67291e+06	5.41235e+06	5.43541e+06	6.51694e+06	6.31897e+06	5.89531e+06	60335.1	2.088e+06	4.23311e+06	5.67291e+06	4.70322e+06	3.26461e+06	4	4	4	4	3	4	4	4	4	4	High	High	High	High	Peak Found	High	High	High	High	High	14	13.253	58.78
High	Q92900	Regulator of nonsense transcripts 1 OS=Homo sapiens OX=9606 GN=UPF1 PE=1 SV=2	UPF1	ENSG00000005007.12	187	25	0.901828	0.00609853	1.44346e+07	1.59246e+07	1.52641e+07	1.57287e+07	1.83068e+07	1.7032e+07	1.73346e+07	1.66692e+07	1.28269e+07	1.31568e+07	1.32236e+07	1.30028e+07	305349	7.46835e+06	1.26231e+07	1.73346e+07	1.44852e+07	9.50521e+06	22	24	24	24	12	24	24	24	24	24	High	High	High	High	Peak Found	High	High	High	High	High	32	109.366	92.22
High	P26373	60S ribosomal protein L13 OS=Homo sapiens OX=9606 GN=RPL13 PE=1 SV=4	RPL13	ENSG00000167526.13	245	6	0.805885	0.00609959	4.6134e+07	4.87625e+07	5.26216e+07	5.16445e+07	5.44132e+07	6.48451e+07	6.20594e+07	6.25328e+07	4.09956e+07	4.02872e+07	4.5587e+07	4.26941e+07	1.10526e+06	2.21981e+07	4.80592e+07	6.20594e+07	5.43396e+07	2.18619e+07	8	8	8	8	7	8	8	8	8	8	High	High	High	High	High	High	High	High	High	High	29	34.677	202.33
High	Q5T9A4	ATPase family AAA domain-containing protein 3B OS=Homo sapiens OX=9606 GN=ATAD3B PE=1 SV=1	ATAD3B	ENSG00000160072.19	74	3	0.674286	0.00612252	1.20279e+06	1.69483e+06	1.424e+06	1.40344e+06	2.14474e+06	2.04848e+06	1.75824e+06	2.30674e+06	1.06882e+06	1.40025e+06	1.23364e+06	1.16021e+06	61320.4	874957	1.51821e+06	1.75824e+06	2.00451e+06	1.35449e+06	3	3	3	2	1	3	3	2	3	3	Peak Found	High	High	Peak Found	Peak Found	High	Peak Found	High	High	High	17	37	69.49
High	P12429	Annexin A3 OS=Homo sapiens OX=9606 GN=ANXA3 PE=1 SV=3	ANXA3	ENSG00000138772.12	25	9	1.69691	0.00613132	4.79184e+06	4.78273e+06	5.23283e+06	3.3389e+06	2.97962e+06	2.42659e+06	2.84212e+06	2.80024e+06	4.25812e+06	3.95146e+06	4.53329e+06	2.76024e+06	25824.2	1.21555e+06	1.79844e+06	2.84212e+06	2.43334e+06	1.22764e+06	9	9	9	8	1	9	7	8	9	8	High	High	High	High	Peak Found	High	High	High	High	Peak Found	35	28.933	3.65
High	Q13685	Angio-associated migratory cell protein OS=Homo sapiens OX=9606 GN=AAMP PE=1 SV=2	AAMP	ENSG00000127837.9	25	5	0.764128	0.00640461	1.5313e+06	2.0694e+06	1.73679e+06	1.99609e+06	2.21689e+06	2.50884e+06	2.45671e+06	2.42844e+06	1.36074e+06	1.70972e+06	1.50461e+06	1.65015e+06		904392	1.8594e+06	2.45671e+06	2.11026e+06	960967	5	5	5	5		5	5	5	5	5	High	High	High	High	Not Found	High	High	High	High	High	19	20.583	5.16
High	P49588	Alanine--tRNA ligase, cytoplasmic OS=Homo sapiens OX=9606 GN=AARS1 PE=1 SV=2	AARS	ENSG00000090861.15	437	34	0.821026	0.00648023	7.45497e+07	9.48998e+07	8.88101e+07	8.69869e+07	1.19859e+08	1.03475e+08	1.09091e+08	1.05027e+08	6.62464e+07	7.84055e+07	7.69378e+07	7.19114e+07	1.40573e+06	4.88968e+07	7.66896e+07	1.09091e+08	9.12663e+07	5.24134e+07	41	41	40	41	21	40	40	40	40	38	High	High	High	High	Peak Found	High	High	High	High	High	56	340.786	546.61
High	Q07866	Kinesin light chain 1 OS=Homo sapiens OX=9606 GN=KLC1 PE=1 SV=2	KLC1	ENSG00000126214.21	38	5	0.821401	0.00649094	1.63305e+06	1.92573e+06	1.90941e+06	1.71982e+06	2.57314e+06	2.16081e+06	2.2388e+06	2.17954e+06	1.45116e+06	1.59102e+06	1.65416e+06	1.42176e+06		1.04973e+06	1.60146e+06	2.2388e+06	1.89398e+06	566688	5	5	5	5		5	5	5	5	4	High	High	High	Peak Found	Not Found	High	High	High	High	Peak Found	17	30.634	31.06
High	Q14126	Desmoglein-2 OS=Homo sapiens OX=9606 GN=DSG2 PE=1 SV=2	DSG2	ENSG00000046604.12	62	13	1.29029	0.00654231	5.15772e+06	4.98341e+06	5.05639e+06	4.74624e+06	4.63996e+06	3.95048e+06	3.59428e+06	3.83054e+06	4.58325e+06	4.11725e+06	4.38044e+06	3.92368e+06		1.89289e+06	2.92785e+06	3.59428e+06	3.32865e+06	1.76516e+06	12	10	10	10		10	8	8	9	8	High	High	High	High	Not Found	High	High	High	High	High	18	47.646	19.48
High	P13797	Plastin-3 OS=Homo sapiens OX=9606 GN=PLS3 PE=1 SV=4	PLS3	ENSG00000102024.17	185	17	0.833977	0.00657838	1.29252e+07	1.27724e+07	1.43739e+07	1.38539e+07	1.84444e+07	1.55863e+07	1.60948e+07	1.60153e+07	1.14856e+07	1.05525e+07	1.24524e+07	1.14529e+07	207050	7.52445e+06	1.15516e+07	1.60948e+07	1.39169e+07	9.50187e+06	18	16	18	18	6	18	18	18	18	18	High	High	High	High	Peak Found	High	High	High	High	High	44	99.42	109.41
High	Q15758	Neutral amino acid transporter B(0) OS=Homo sapiens OX=9606 GN=SLC1A5 PE=1 SV=2	SLC1A5	ENSG00000105281.12	133	10	0.786741	0.00660349	9.39655e+06	1.15531e+07	1.08686e+07	1.01558e+07	1.46829e+07	1.33954e+07	1.3328e+07	1.20688e+07	8.34996e+06	9.54508e+06	9.41563e+06	8.39572e+06	137941	5.98994e+06	9.92782e+06	1.3328e+07	1.04875e+07	7.93793e+06	10	11	10	11	5	10	10	10	10	10	High	High	High	High	Peak Found	High	High	High	High	High	24	54.637	103.38
High	O43583	Density-regulated protein OS=Homo sapiens OX=9606 GN=DENR PE=1 SV=2	DENR	ENSG00000139726.10	74	9	0.914734	0.00671201	7.68216e+06	8.26479e+06	8.22087e+06	8.28309e+06	8.54553e+06	9.08422e+06	9.23905e+06	8.93813e+06	6.82652e+06	6.82831e+06	7.12188e+06	6.84757e+06	46668.6	3.48618e+06	6.73266e+06	9.23905e+06	7.76704e+06	1.40038e+06	7	7	7	7	2	8	7	8	7	7	High	High	High	High	Peak Found	High	High	High	High	High	69	47.81	92.36
High	Q9Y5M8	Signal recognition particle receptor subunit beta OS=Homo sapiens OX=9606 GN=SRPRB PE=1 SV=3	SRPRB	ENSG00000144867.11	100	11	0.80286	0.00673987	1.28998e+07	1.47745e+07	1.40843e+07	1.35074e+07	1.49536e+07	1.72112e+07	1.75459e+07	1.71555e+07	1.1463e+07	1.22066e+07	1.22014e+07	1.11665e+07	183708	6.10039e+06	1.27559e+07	1.75459e+07	1.49078e+07	1.06221e+07	11	11	11	11	4	11	11	11	11	11	High	High	High	High	Peak Found	High	High	High	High	High	56	75.925	87.34
High	Q9BPW8	Protein NipSnap homolog 1 OS=Homo sapiens OX=9606 GN=NIPSNAP1 PE=1 SV=1	NIPSNAP1	ENSG00000184117.11	55	5	1.34475	0.00674661	3.69915e+06	3.9189e+06	4.56431e+06	3.92409e+06	2.24697e+06	2.65386e+06	3.21613e+06	3.17844e+06	3.28714e+06	3.23777e+06	3.95414e+06	3.24402e+06	64001.1	916661	1.96688e+06	3.21613e+06	2.762e+06	1.38205e+06	5	4	5	5	2	3	4	4	4	4	High	High	High	High	Peak Found	High	High	High	High	High	30	27.162	15.15
High	Q9UHY7	Enolase-phosphatase E1 OS=Homo sapiens OX=9606 GN=ENOPH1 PE=1 SV=1	ENOPH1	ENSG00000145293.15	53	5	0.771361	0.00679912	2.94812e+06	3.70303e+06	3.8718e+06	3.0877e+06	4.97987e+06	4.41023e+06	4.28267e+06	4.39334e+06	2.61975e+06	3.05941e+06	3.35421e+06	2.55258e+06	259325	2.03156e+06	3.26859e+06	4.28267e+06	3.81771e+06	1.91009e+06	5	6	6	5	2	5	6	4	5	5	High	High	High	High	Peak Found	High	High	High	High	High	33	40.227	38.98
High	O00267	Transcription elongation factor SPT5 OS=Homo sapiens OX=9606 GN=SUPT5H PE=1 SV=1	SUPT5H	ENSG00000196235.13	41	12	0.835761	0.00686235	3.6615e+06	4.38293e+06	4.36393e+06	4.28928e+06	4.66547e+06	5.23344e+06	5.33057e+06	5.12025e+06	3.25368e+06	3.62114e+06	3.78055e+06	3.54592e+06	3530.88	1.9033e+06	3.8787e+06	5.33057e+06	4.44939e+06	2.15879e+06	11	11	12	12	1	11	13	12	12	11	High	High	High	High	Peak Found	High	High	High	High	High	17	54.608	9.33
High	Q96SI9	Spermatid perinuclear RNA-binding protein OS=Homo sapiens OX=9606 GN=STRBP PE=1 SV=1	STRBP	ENSG00000165209.18	106	9	0.824957	0.00691575	3.09207e+06	3.17753e+06	3.28267e+06	3.29316e+06	3.73847e+06	3.96222e+06	3.86874e+06	4.65252e+06	2747677	2.62525e+06	2.84384e+06	2.72243e+06	288638	1.52512e+06	2.93655e+06	3.86874e+06	4.04294e+06	2.59903e+06	8	7	8	7	2	8	7	7	8	8	High	High	High	High	Peak Found	High	High	High	High	High	21	43.362	77.43
High	P61086	Ubiquitin-conjugating enzyme E2 K OS=Homo sapiens OX=9606 GN=UBE2K PE=1 SV=3	UBE2K	ENSG00000078140.13	40	5	0.835739	0.00692928	6.07582e+06	7.3872e+06	7.03568e+06	7.03742e+06	9.49508e+06	8.06083e+06	8.60579e+06	8.23331e+06	5.3991e+06	6.10325e+06	6.09513e+06	5.81778e+06	80784.8	3.87356e+06	5.97419e+06	8.60579e+06	7.15457e+06	4.11825e+06	5	5	5	5	2	5	5	5	5	5	High	High	High	High	Peak Found	High	High	High	High	High	40	24.982	40.79
High	Q9P287	BRCA2 and CDKN1A-interacting protein OS=Homo sapiens OX=9606 GN=BCCIP PE=1 SV=1	BCCIP	ENSG00000107949.16	32	5	0.773682	0.00698391	3.18353e+06	3.31826e+06	3.03336e+06	2.13575e+06	4.55364e+06	3.98157e+06	3.94265e+06	4.05389e+06	2.82895e+06	2741519	2.62786e+06	1.76561e+06		1.85768e+06	2.95089e+06	3.94265e+06	3.52274e+06	1.14528e+06	6	6	5	4		5	5	5	5	4	High	High	High	High	Not Found	High	High	High	High	High	25	32.172	39.9
High	P15121	Aldo-keto reductase family 1 member B1 OS=Homo sapiens OX=9606 GN=AKR1B1 PE=1 SV=3	AKR1B1	ENSG00000085662.13	111	12	0.720937	0.00720957	1.46731e+07	1.75029e+07	1.63592e+07	1.72912e+07	1.84505e+07	2.31011e+07	2.35747e+07	2.44141e+07	1.30388e+07	1.44607e+07	1.41722e+07	1.42945e+07	266333	7.52695e+06	1.71211e+07	2.35747e+07	2.12153e+07	1.14697e+07	14	14	15	14	5	14	13	14	15	15	High	High	High	High	Peak Found	High	High	High	High	High	62	56.52	47.37
High	Q9UHB6	LIM domain and actin-binding protein 1 OS=Homo sapiens OX=9606 GN=LIMA1 PE=1 SV=1	LIMA1	ENSG00000050405.13	42	12	0.915802	0.00721213	3.73118e+06	3.68328e+06	3.4541e+06	3.61178e+06	4.10564e+06	3.99913e+06	3.96663e+06	3.80187e+06	3.3156e+06	3.0431e+06	2.99235e+06	2.98583e+06		1.67491e+06	2.96391e+06	3.96663e+06	3.30374e+06	1.40324e+06	11	10	10	10		11	10	11	10	9	High	High	High	High	Not Found	High	High	High	High	High	22	41.583	14.12
High	Q13488	V-type proton ATPase 116 kDa subunit a isoform 3 OS=Homo sapiens OX=9606 GN=TCIRG1 PE=1 SV=3	TCIRG1	ENSG00000110719.9	12	3	1.27159	0.00721453	1.75942e+06	2.00053e+06	2.21005e+06	1.81626e+06	1.40065e+06	1.61541e+06	1.50501e+06	1.49657e+06	1.56346e+06	1.65282e+06	1.9146e+06	1.50149e+06	32132.3	571400	1.19724e+06	1.50501e+06	1.30049e+06	891008	3	3	3	3	1	3	3	3	3	3	High	High	High	High	Peak Found	Peak Found	Peak Found	High	Peak Found	High	4	9.181	3.8
High	Q13190	Syntaxin-5 OS=Homo sapiens OX=9606 GN=STX5 PE=1 SV=2	STX5	ENSG00000162236.11	10	3	0.789453	0.00732664	658902	637469	650023	618707	974246	812248	744644	818616	585514	526672	563126	511480	16902.3	397448	601988	744644	711360	379741	2	2	2	2	1	2	2	2	2	2	High	High	High	Peak Found	Peak Found	High	Peak Found	High	High	High	14	18.078	4
High	Q02218	2-oxoglutarate dehydrogenase, mitochondrial OS=Homo sapiens OX=9606 GN=OGDH PE=1 SV=3	OGDH	ENSG00000105953.14	129	22	1.38988	0.00744926	1.1994e+07	1.53487e+07	1.43739e+07	1.1655e+07	1.0309e+07	8.40746e+06	9.78875e+06	9.18266e+06	1.06581e+07	1.2681e+07	1.24524e+07	9.63507e+06	274096	4.20561e+06	6.23109e+06	9.78875e+06	7.97953e+06	4.6013e+06	21	22	22	21	7	18	19	21	20	18	High	High	High	High	Peak Found	High	High	High	High	High	35	90.633	39.11
High	Q9UIJ7	GTP:AMP phosphotransferase AK3, mitochondrial OS=Homo sapiens OX=9606 GN=AK3 PE=1 SV=4	AK3	ENSG00000147853.16	25	6	1.66404	0.00747109	4.26574e+06	4.78662e+06	4.52062e+06	3.14459e+06	2.73195e+06	2.914e+06	2.54818e+06	1.98736e+06	3.79062e+06	3.95467e+06	3.9163e+06	2599611	148508	1.11451e+06	2.15968e+06	2.54818e+06	1726973	1.2862e+06	5	5	5	4	2	4	4	4	3	4	High	High	High	High	Peak Found	High	High	High	High	High	35	22.899	7.44
High	P62995	Transformer-2 protein homolog beta OS=Homo sapiens OX=9606 GN=TRA2B PE=1 SV=1	TRA2B	ENSG00000136527.17	84	5	0.845177	0.00763847	1.24498e+07	1.24665e+07	1.27675e+07	1.35464e+07	1.65121e+07	1.40098e+07	1.48462e+07	1.50102e+07	1.10632e+07	1.02998e+07	1.10607e+07	1.11987e+07	92209.8	6.73618e+06	1.03832e+07	1.48462e+07	1.30436e+07	1.93173e+06	5	5	5	5	2	5	5	5	5	5	High	High	High	High	Peak Found	High	High	High	High	High	27	44.912	80.05
High	Q96I15	Selenocysteine lyase OS=Homo sapiens OX=9606 GN=SCLY PE=1 SV=4	SCLY		11	2	0.846745	0.00767057	610255	780882	752447	721081	857009	894029	844945	883217	542285	645159	651858	596112		349620	662599	844945	767497	387656	2	2	2	2		2	2	2	2	2	High	High	High	High	Not Found	Peak Found	Peak Found	High	High	High	7	7.228	2.15
High	Q9Y277	Voltage-dependent anion-selective channel protein 3 OS=Homo sapiens OX=9606 GN=VDAC3 PE=1 SV=1	VDAC3	ENSG00000078668.13	174	10	1.20706	0.00770691	5.39888e+07	4.90207e+07	5.77385e+07	5.4587e+07	4.06946e+07	4.49473e+07	4.79277e+07	4.50031e+07	4.79755e+07	4.05005e+07	5.00199e+07	4.51266e+07	1.16882e+06	1.66015e+07	3.33122e+07	4.79277e+07	3.91067e+07	3.27319e+07	12	11	12	12	8	11	11	11	11	12	High	High	High	High	High	High	High	High	High	High	51	86.528	264.22
High	Q8IVS2	Malonyl-CoA-acyl carrier protein transacylase, mitochondrial OS=Homo sapiens OX=9606 GN=MCAT PE=1 SV=2	MCAT	ENSG00000100294.12	10	3	0.845373	0.00772858	3.54101e+06	4.04783e+06	4.04266e+06	3.56591e+06	4.56571e+06	4.21846e+06	4.43454e+06	4.63522e+06	3146611	3.34429e+06	3.50223e+06	2.94791e+06	80448.6	1.8626e+06	3.12646e+06	4.43454e+06	4.02791e+06	2.05979e+06	2	2	2	2	1	2	3	3	3	2	Peak Found	Peak Found	High	High	Peak Found	High	Peak Found	High	High	Peak Found	12	10.496	0
High	Q9UJX2	Cell division cycle protein 23 homolog OS=Homo sapiens OX=9606 GN=CDC23 PE=1 SV=3	CDC23	ENSG00000094880.10	3	2	0.724571	0.00785056	465974	416695	594199	516440	734110	686400	669456	613403	414074	344270	514765	426937		299483	508717	669456	533034	478091	1	1	1	1		1	1	1	1	1	Peak Found	Peak Found	High	Peak Found	Not Found	Peak Found	Peak Found	High	High	Peak Found	5	6.542	0
High	P18827	Syndecan-1 OS=Homo sapiens OX=9606 GN=SDC1 PE=1 SV=3	SDC1	ENSG00000115884.10	10	2	1.18928	0.00794758	1.59888e+06	1.68497e+06	1.86252e+06	1.56013e+06	1.3584e+06	1.4028e+06	1.23708e+06	1.44539e+06	1.42079e+06	1.39211e+06	1.61354e+06	1.28975e+06	36015	554167	1.03967e+06	1.23708e+06	1.25602e+06	368028	2	2	2	2	1	2	2	2	2	1	High	High	High	High	Peak Found	High	High	High	High	Peak Found	9	9.014	14.91
High	P49585	Choline-phosphate cytidylyltransferase A OS=Homo sapiens OX=9606 GN=PCYT1A PE=1 SV=2	PCYT1A	ENSG00000161217.11	14	3	0.872617	0.00796664	900390	931207	954541	845835	1.19277e+06	1.03348e+06	1.03703e+06	1.06194e+06	800104	769356	826936	699245		486596	765950	1.03703e+06	922802	209330	2	2	2	2		2	2	2	2	1	High	High	High	High	Not Found	High	Peak Found	High	High	High	13	9.871	2.1
High	P42224	Signal transducer and activator of transcription 1-alpha/beta OS=Homo sapiens OX=9606 GN=STAT1 PE=1 SV=2	STAT1	ENSG00000115415.18	95	16	1.25977	0.00799511	9.15689e+06	9.60714e+06	1.14705e+07	8.98705e+06	7.38316e+06	7.51161e+06	6.84256e+06	7.92934e+06	8.137e+06	7.93735e+06	9.93706e+06	7.42953e+06	167280	3.01199e+06	5.56714e+06	6.84256e+06	6.89042e+06	4.03564e+06	14	14	15	14	4	12	12	13	13	11	High	High	High	High	Peak Found	High	High	High	High	High	31	66.236	82.25
High	P55084	Trifunctional enzyme subunit beta, mitochondrial OS=Homo sapiens OX=9606 GN=HADHB PE=1 SV=3	HADHB	ENSG00000138029.13	138	14	1.14001	0.00814736	2.26347e+07	2.48004e+07	2.44698e+07	2.33238e+07	1.92682e+07	2.09183e+07	2.10056e+07	2.20906e+07	2.01137e+07	2.04899e+07	2.11986e+07	19281587	699990	7.86054e+06	1.55034e+07	2.10056e+07	1.91963e+07	9.99202e+06	15	15	15	15	9	14	15	15	15	14	High	High	High	High	High	High	High	High	High	High	40	79.022	79.73
High	P23588	Eukaryotic translation initiation factor 4B OS=Homo sapiens OX=9606 GN=EIF4B PE=1 SV=2	EIF4B	ENSG00000063046.17	86	11	0.748754	0.00817213	1.22012e+07	9.82865e+06	1.10244e+07	1.07089e+07	1.61554e+07	1.25818e+07	1.49993e+07	1.40267e+07	1.08422e+07	8.12035e+06	9.55064e+06	8.853e+06		6.59066e+06	9.32484e+06	1.49993e+07	1.21889e+07	1.83639e+06	10	9	10	10		10	10	10	10	8	High	High	High	High	Not Found	High	High	High	High	Peak Found	23	47.372	49.49
High	Q9H5Q4	Dimethyladenosine transferase 2, mitochondrial OS=Homo sapiens OX=9606 GN=TFB2M PE=1 SV=1	TFB2M	ENSG00000162851.7	23	5	0.772555	0.00822494	1.65035e+06	1.40038e+06	1.92996e+06	1.91916e+06	2.17558e+06	2.41831e+06	2.2021e+06	2.6047e+06	1.46653e+06	1.15698e+06	1.67196e+06	1.58656e+06	12007.6	887537	1.7923e+06	2.2021e+06	2.26343e+06	1.26738e+06	5	4	5	5	1	5	5	5	5	5	High	High	High	High	Peak Found	High	High	High	High	High	13	14.075	5.79
High	Q13310	Polyadenylate-binding protein 4 OS=Homo sapiens OX=9606 GN=PABPC4 PE=1 SV=1	PABPC4	ENSG00000090621.13	246	8	0.887549	0.00824725	1.03154e+07	1.09097e+07	1.12718e+07	1.12206e+07	1.16902e+07	1.30395e+07	12833673	1.21005e+07	9.16651e+06	9.01354e+06	9.76493e+06	9.27596e+06	183242	4.76905e+06	9.66405e+06	12833673	1.05151e+07	5.38877e+06	8	8	8	8	5	8	8	8	7	8	High	High	High	High	Peak Found	High	High	High	High	High	30	126.432	293.47
High	P68104	Elongation factor 1-alpha 1 OS=Homo sapiens OX=9606 GN=EEF1A1 PE=1 SV=1	EEF1A1	ENSG00000156508.17	1593	15	0.853024	0.00825733	7.34035e+08	8.53669e+08	8.18022e+08	7.94921e+08	8.6433e+08	9.45699e+08	9.45787e+08	9.45154e+08	6.52278e+08	7.05295e+08	7.08667e+08	6.57155e+08	2.9463e+07	3.52607e+08	7.00894e+08	9.45787e+08	8.21318e+08	5.55839e+08	31	32	32	32	23	29	32	31	31	31	High	High	High	High	High	High	High	High	High	High	59	343.652	2454.42
High	P62081	40S ribosomal protein S7 OS=Homo sapiens OX=9606 GN=RPS7 PE=1 SV=1	RPS7	ENSG00000171863.12	225	8	0.748501	0.00829036	9.06413e+07	1.10023e+08	1.06253e+08	1.04189e+08	1.81303e+08	1.34237e+08	1.33633e+08	1.46915e+08	8.05457e+07	9.09002e+07	9.20492e+07	8.61323e+07	3.03432e+06	7.39635e+07	9.9488e+07	1.33633e+08	1.27666e+08	6.90633e+07	11	12	12	12	10	12	12	12	12	12	High	High	High	High	High	High	High	High	High	High	56	68.081	295.82
High	P31930	Cytochrome b-c1 complex subunit 1, mitochondrial OS=Homo sapiens OX=9606 GN=UQCRC1 PE=1 SV=3	UQCRC1	ENSG00000010256.10	218	17	1.13982	0.00839349	4.58745e+07	5.08838e+07	5.15881e+07	4.97171e+07	4.26562e+07	4.50403e+07	4.51753e+07	4.32198e+07	4.0765e+07	4.20398e+07	4.46917e+07	4.11008e+07	799130	1.74018e+07	3.33811e+07	4.51753e+07	3.75571e+07	3.04646e+07	20	20	20	20	10	20	20	20	20	20	High	High	High	High	High	High	High	High	High	High	58	159.005	239.21
High	Q9UHD1	Cysteine and histidine-rich domain-containing protein 1 OS=Homo sapiens OX=9606 GN=CHORDC1 PE=1 SV=2	CHORDC1	ENSG00000110172.11	134	9	0.853167	0.00844847	1.37579e+07	1.59761e+07	1.36525e+07	1.44911e+07	1.66286e+07	1.64006e+07	1.64821e+07	1.66784e+07	1.22255e+07	1.31993e+07	1.18274e+07	1.19797e+07	148124	6.7837e+06	1.21551e+07	1.64821e+07	1.44932e+07	6.81352e+06	10	10	10	10	3	9	10	10	10	10	High	High	High	High	Peak Found	High	High	High	High	High	44	72.565	135.49
High	Q9NTX5	Ethylmalonyl-CoA decarboxylase OS=Homo sapiens OX=9606 GN=ECHDC1 PE=1 SV=2	ECHDC1	ENSG00000093144.18	40	7	2.1067	0.00847624	3.79274e+06	4.56899e+06	2.44666e+06	3.97625e+06	2.26572e+06	1.56049e+06	1.92378e+06	1.76397e+06	3.37031e+06	3.77486e+06	2.11958e+06	3.28713e+06	96015.6	924309	1.15654e+06	1.92378e+06	1.53285e+06	1.83511e+06	5	5	4	5	2	4	3	4	4	5	High	High	High	High	Peak Found	High	High	High	High	High	29	24.799	8.56
High	O76021	Ribosomal L1 domain-containing protein 1 OS=Homo sapiens OX=9606 GN=RSL1D1 PE=1 SV=3	RSL1D1	ENSG00000171490.12	152	11	0.853762	0.0085457	1.86551e+07	2.14053e+07	2.0779e+07	2.1843e+07	2.77696e+07	2.35768e+07	2.53713e+07	2.40386e+07	1.65773e+07	1.76849e+07	1.80012e+07	1.80575e+07	553676	1.13287e+07	1.74737e+07	2.53713e+07	2.0889e+07	1.39907e+07	11	11	11	11	10	11	11	11	11	11	High	High	High	High	High	High	High	High	High	High	29	68.923	111.67
High	P48047	ATP synthase subunit O, mitochondrial OS=Homo sapiens OX=9606 GN=ATP5PO PE=1 SV=1	ATP5O	ENSG00000241837.6	156	9	1.18421	0.00856277	3.24718e+07	3.65317e+07	3.71496e+07	3.35217e+07	3.16596e+07	2.81697e+07	2.97438e+07	2.94125e+07	2.88551e+07	3.01822e+07	3.21834e+07	2.77121e+07	1.2859e+06	1.29157e+07	2.08777e+07	2.97438e+07	2.55588e+07	1.54706e+07	10	10	10	10	7	10	10	10	10	10	High	High	High	High	High	High	High	High	High	High	55	77.829	176.84
High	Q13596	Sorting nexin-1 OS=Homo sapiens OX=9606 GN=SNX1 PE=1 SV=3	SNX1	ENSG00000028528.14	45	7	1.24324	0.00859599	4.09976e+06	4.7971e+06	4.79074e+06	4.37824e+06	3.6838e+06	3.69129e+06	3.16289e+06	3.92876e+06	3.64313e+06	3.96333e+06	4.1503e+06	3.61946e+06	86654.5	1.50282e+06	2.73576e+06	3.16289e+06	3.41401e+06	1.41619e+06	7	7	7	7	1	7	7	6	7	6	High	High	High	High	Peak Found	High	High	High	High	High	19	31.962	16.39
High	Q5VV41	Rho guanine nucleotide exchange factor 16 OS=Homo sapiens OX=9606 GN=ARHGEF16 PE=1 SV=1	ARHGEF16	ENSG00000130762.14	90	15	0.840539	0.0086289	8.9342e+06	1.08645e+07	1.03205e+07	9.94606e+06	1.23284e+07	1.11386e+07	1.22583e+07	1.18531e+07	7.93911e+06	8.97614e+06	8.94085e+06	8.22233e+06	202715	5.02941e+06	8.25523e+06	1.22583e+07	1.03001e+07	6.25995e+06	14	15	15	15	7	14	14	15	15	13	High	High	High	High	Peak Found	High	High	High	High	High	29	61.327	55.92
High	Q9NUQ8	ATP-binding cassette sub-family F member 3 OS=Homo sapiens OX=9606 GN=ABCF3 PE=1 SV=2	ABCF3	ENSG00000161204.11	30	6	0.811077	0.00863008	1.75513e+06	1.86671e+06	2.20752e+06	1.90041e+06	2.39676e+06	2.25047e+06	2.29577e+06	2.34882e+06	1.55965e+06	1.54226e+06	1.91242e+06	1.57106e+06		977770	1.66791e+06	2.29577e+06	2.04108e+06	1.11448e+06	5	6	6	6		6	5	6	6	5	High	High	High	High	Not Found	High	High	High	High	High	11	17.21	3.72
High	O00330	Pyruvate dehydrogenase protein X component, mitochondrial OS=Homo sapiens OX=9606 GN=PDHX PE=1 SV=3	PDHX	ENSG00000110435.11	37	7	1.14177	0.00870913	6.97982e+06	7.85757e+06	7.78754e+06	7.53631e+06	6.63772e+06	6.91595e+06	6.68393e+06	6.73725e+06	6.20241e+06	6.49187e+06	6.74649e+06	6.23021e+06	191216	2.70788e+06	5.12567e+06	6.68393e+06	5.85452e+06	2.6295e+06	6	6	6	6	3	6	6	6	6	6	High	High	High	High	Peak Found	High	High	High	High	High	18	34.563	23.94
High	Q9NSI2	Protein FAM207A OS=Homo sapiens OX=9606 GN=FAM207A PE=1 SV=2	FAM207A	ENSG00000160256.12	13	3	0.790913	0.00877235	871061	870451	859830	856115	934308	1.12182e+06	1.06589e+06	1.20454e+06	774042	719160	744886	707744		381155	831421	1.06589e+06	1.04672e+06	373431	3	3	2	3		3	3	3	3	2	High	High	High	High	Not Found	High	High	High	High	Peak Found	17	10.475	1.66
High	O95169	NADH dehydrogenase [ubiquinone] 1 beta subcomplex subunit 8, mitochondrial OS=Homo sapiens OX=9606 GN=NDUFB8 PE=1 SV=1	NDUFB8	ENSG00000166136.15	8	2	1.22319	0.00883867	820423	872649	772488	796569	638261	683681	742039	579403	729044	720976	669220	658517		260381	506702	742039	503489	399908	1	1	1	1		1	1	1	1	1	High	High	Peak Found	High	Not Found	High	High	High	Peak Found	High	16	6.681	1.7
High	Q9UBQ7	Glyoxylate reductase/hydroxypyruvate reductase OS=Homo sapiens OX=9606 GN=GRHPR PE=1 SV=1	GRHPR	ENSG00000137106.17	86	10	1.24391	0.00887196	1.75182e+07	2.01293e+07	1.93486e+07	1.80495e+07	1.71825e+07	1.41887e+07	1.45869e+07	1.54781e+07	1.5567e+07	1.66307e+07	1.6762e+07	1.49214e+07	414060	7.00967e+06	1.05158e+07	1.45869e+07	1.34501e+07	8.97774e+06	10	10	10	10	8	10	9	9	9	10	High	High	High	High	Peak Found	High	High	High	High	High	49	57.813	85.12
High	Q92973	Transportin-1 OS=Homo sapiens OX=9606 GN=TNPO1 PE=1 SV=2	TNPO1	ENSG00000083312.17	182	16	0.837639	0.00891606	1.54753e+07	1.87442e+07	1.77378e+07	1.75437e+07	2.31287e+07	2.01186e+07	1.99345e+07	2.20016e+07	1.37516e+07	1.54863e+07	1.53666e+07	1.45032e+07	381714	9.43546e+06	1.49107e+07	1.99345e+07	1.91189e+07	1.40162e+07	14	16	15	16	8	15	16	14	14	16	High	High	High	High	Peak Found	High	High	High	High	High	31	108.677	213.69
High	P07948	Tyrosine-protein kinase Lyn OS=Homo sapiens OX=9606 GN=LYN PE=1 SV=3	LYN	ENSG00000254087.7	19	2	0.78624	0.00895872	561081	616197	509559	499314	746822	632893	661169	700553	498588	509097	441440	412779		304669	469062	661169	608765	429417	2	2	2	2		2	2	2	2	2	Peak Found	High	Peak Found	High	Not Found	Peak Found	Peak Found	High	High	High	11	12.138	5.39
High	Q13637	Ras-related protein Rab-32 OS=Homo sapiens OX=9606 GN=RAB32 PE=1 SV=3	RAB32	ENSG00000118508.4	18	3	0.394218	0.00901672	658470	940772	1.57799e+06	685317	1.53766e+06	2.30484e+06	2.14769e+06	1.97716e+06	585130	777259	1.36704e+06	566546		627294	1.7082e+06	2.14769e+06	1.71811e+06	1.25852e+06	2	2	3	2		3	3	3	3	3	High	High	High	Peak Found	Not Found	High	High	High	High	High	18	11.981	3.3
High	Q9ULX3	RNA-binding protein NOB1 OS=Homo sapiens OX=9606 GN=NOB1 PE=1 SV=1	NOB1	ENSG00000141101.12	27	6	0.818484	0.00903096	2.98036e+06	3.42397e+06	3.46822e+06	3.4731e+06	4.67276e+06	3.73672e+06	4.10076e+06	4.31992e+06	2.64841e+06	2.82886e+06	3.00458e+06	2.87118e+06		1.90627e+06	2.76942e+06	4.10076e+06	3.75391e+06	2.42096e+06	6	6	6	6		6	6	6	6	6	High	High	High	High	Not Found	High	High	High	High	High	19	21.66	10.39
High	Q12849	G-rich sequence factor 1 OS=Homo sapiens OX=9606 GN=GRSF1 PE=1 SV=3	GRSF1	ENSG00000132463.13	110	14	0.833547	0.00912617	1.17122e+07	1.01705e+07	1.07338e+07	1.17141e+07	1.46632e+07	1.3648e+07	1.32803e+07	1.22479e+07	1.04077e+07	8.40278e+06	9.29889e+06	9.68392e+06	136850	5.98191e+06	1.01151e+07	1.32803e+07	1.06431e+07	7.23559e+06	11	12	11	12	5	12	12	12	12	11	High	High	High	High	Peak Found	High	High	High	High	High	42	60.693	64.51
High	P84098	60S ribosomal protein L19 OS=Homo sapiens OX=9606 GN=RPL19 PE=1 SV=1	RPL19	ENSG00000108298.9	79	5	0.813404	0.0091375	2.38672e+07	2.51994e+07	2.60288e+07	2.79413e+07	2.78042e+07	3.15664e+07	3.24321e+07	3.14137e+07	2.12089e+07	2.08196e+07	2.25492e+07	2.30989e+07	401122	1.13428e+07	2.3395e+07	3.24321e+07	2.72979e+07	1.05834e+07	5	6	6	6	2	6	5	6	6	6	High	High	High	High	High	High	High	High	High	High	26	34.404	91.46
High	P31689	DnaJ homolog subfamily A member 1 OS=Homo sapiens OX=9606 GN=DNAJA1 PE=1 SV=2	DNAJA1	ENSG00000086061.15	182	13	0.868147	0.00915062	2.53425e+07	2.89684e+07	2.76958e+07	2.56244e+07	3.0461e+07	2.95127e+07	3.20872e+07	3.09574e+07	2.25199e+07	2.39335e+07	2.39933e+07	2.11835e+07	533415	1.24267e+07	2.1873e+07	3.20872e+07	2.69013e+07	1.13854e+07	18	17	17	17	8	16	17	17	16	18	High	High	High	High	Peak Found	High	High	High	High	High	55	109.474	150.08
High	P55196	Afadin OS=Homo sapiens OX=9606 GN=AFDN PE=1 SV=3	MLLT4; AFDN	ENSG00000130396.20	8	3	1.28667	0.00917581	660411	824724	780656	739116	466885	606124	616706	575045	586854	681381	676296	611022	16479.8	190468	449222	616706	499702	362677	3	3	3	3	1	3	3	3	3	3	High	High	High	High	Peak Found	Peak Found	High	Peak Found	Peak Found	High	2	7.176	0
High	Q9GZP4	PITH domain-containing protein 1 OS=Homo sapiens OX=9606 GN=PITHD1 PE=1 SV=1	PITHD1	ENSG00000057757.9	15	3	0.738395	0.00919871	939097	972067	947846	1.08969e+06	1.30399e+06	1.07078e+06	1.33015e+06	1.29613e+06	834500	803115	821135	900836		531966	793595	1.33015e+06	1.12631e+06	569425	3	3	3	3		3	3	3	3	3	High	High	High	Peak Found	Not Found	Peak Found	High	High	High	High	13	9.061	0
High	P00387	NADH-cytochrome b5 reductase 3 OS=Homo sapiens OX=9606 GN=CYB5R3 PE=1 SV=3	CYB5R3	ENSG00000100243.20	86	8	1.27317	0.00924214	1.24415e+07	1.5221e+07	1.57823e+07	1.33883e+07	1.11735e+07	1.12975e+07	1.14913e+07	1.09916e+07	1.10557e+07	1.25755e+07	1.36725e+07	1.1068e+07	236220	4.55826e+06	8.37299e+06	1.14913e+07	9.55146e+06	6.22739e+06	8	8	8	8	5	8	7	8	8	7	High	High	High	High	Peak Found	High	High	High	High	High	37	46.723	39.61
High	P36542	ATP synthase subunit gamma, mitochondrial OS=Homo sapiens OX=9606 GN=ATP5F1C PE=1 SV=1	ATP5C1	ENSG00000165629.19	214	11	1.15245	0.00935261	4.51719e+07	4.98366e+07	5.20051e+07	4.71459e+07	4.15165e+07	3.9321e+07	4.38524e+07	4.26373e+07	4.01407e+07	4.11747e+07	4.50529e+07	3.89752e+07	1.39087e+06	1.69368e+07	2.91423e+07	4.38524e+07	3.70508e+07	2.22402e+07	12	12	12	12	12	12	11	12	12	12	High	High	High	High	High	High	High	High	High	High	45	72.895	160.96
High	Q16881	Thioredoxin reductase 1, cytoplasmic OS=Homo sapiens OX=9606 GN=TXNRD1 PE=1 SV=3	TXNRD1	ENSG00000198431.15	177	17	0.804489	0.00936644	2.92036e+07	2.94934e+07	3.15507e+07	2.91805e+07	4.09703e+07	3.5287e+07	3.76748e+07	3.28744e+07	2.59509e+07	2.43672e+07	2.73329e+07	2.41233e+07	769727	1.6714e+07	2.61525e+07	3.76748e+07	2.85671e+07	2.10142e+07	18	17	19	19	10	19	19	19	17	19	High	High	High	High	Peak Found	High	High	High	High	High	44	126.459	222.57
High	Q10472	Polypeptide N-acetylgalactosaminyltransferase 1 OS=Homo sapiens OX=9606 GN=GALNT1 PE=1 SV=1	GALNT1	ENSG00000141429.13	5	3	1.36318	0.00945987	983302	1.14233e+06	1.16647e+06	1.08865e+06	782056	854550	947125	635470	873782	943788	1.01054e+06	899980		319043	633340	947125	552209	388474	2	2	2	2		2	2	2	1	2	Peak Found	High	High	High	Not Found	Peak Found	High	Peak Found	High	Peak Found	7	6.39	0
High	Q9GZZ9	Ubiquitin-like modifier-activating enzyme 5 OS=Homo sapiens OX=9606 GN=UBA5 PE=1 SV=1	UBA5	ENSG00000081307.12	30	5	1.30273	0.00947858	2.32965e+06	2.71839e+06	2.57768e+06	2.37175e+06	2.12524e+06	1.55237e+06	1.71076e+06	2.08852e+06	2.07017e+06	2.24591e+06	2.23309e+06	1.96071e+06	8400.88	866999	1.15052e+06	1.71076e+06	1.81488e+06	976861	5	5	5	5	1	5	4	4	5	5	High	High	High	High	Peak Found	High	High	High	High	High	23	21.917	6.77
High	Q92747	Actin-related protein 2/3 complex subunit 1A OS=Homo sapiens OX=9606 GN=ARPC1A PE=2 SV=2	ARPC1A	ENSG00000241685.9	35	5	0.700621	0.00947908	1.65975e+06	2.68434e+06	3.25755e+06	2.67487e+06	3.91231e+06	3.70045e+06	3.73691e+06	4.19223e+06	1.47488e+06	2.21778e+06	2.82207e+06	2.2113e+06	63681.1	1.59604e+06	2.74254e+06	3.73691e+06	3.64295e+06	2.04273e+06	4	4	5	5	2	5	5	5	5	4	High	High	High	High	Peak Found	High	High	High	High	High	28	31.271	22.21
High	O95197	Reticulon-3 OS=Homo sapiens OX=9606 GN=RTN3 PE=1 SV=2	RTN3	ENSG00000133318.13	58	3	0.788452	0.00950054	9.80965e+06	1.16156e+07	1.09892e+07	1.10159e+07	1.17352e+07	1.42086e+07	1.4115e+07	1.37942e+07	8.71705e+06	9.59676e+06	9.52015e+06	9.10672e+06	183074	4787429	1.05305e+07	1.4115e+07	1.19868e+07	8.35638e+06	3	3	3	3	2	4	3	3	3	3	High	High	High	High	Peak Found	High	High	High	High	High	6	28.711	41.54
High	Q9H4A4	Aminopeptidase B OS=Homo sapiens OX=9606 GN=RNPEP PE=1 SV=2	RNPEP	ENSG00000176393.10	202	23	1.17357	0.00951808	3.05876e+07	3.49054e+07	3.42332e+07	3.53296e+07	2.72207e+07	2.9568e+07	3.01085e+07	2.93449e+07	2.71807e+07	2.88386e+07	2.96568e+07	2.92067e+07	637298	1.11048e+07	2.1914e+07	3.01085e+07	2.55001e+07	1.61298e+07	22	23	22	22	10	22	22	22	21	21	High	High	High	High	Peak Found	High	High	High	High	High	50	119.595	156.83
High	O43291	Kunitz-type protease inhibitor 2 OS=Homo sapiens OX=9606 GN=SPINT2 PE=1 SV=2	SPINT2	ENSG00000167642.12	34	3	1.55042	0.00956673	3.80475e+06	5.46872e+06	5.11243e+06	4.75651e+06	2.92816e+06	3.43717e+06	3.70834e+06	2.71931e+06	3.38098e+06	4.51821e+06	4.42899e+06	3.93217e+06	60682.1	1.19456e+06	2.54742e+06	3.70834e+06	2.36302e+06	1.84284e+06	3	3	3	3	2	3	3	3	3	3	High	High	High	High	Peak Found	High	High	High	High	High	13	12.858	16.48
High	O60869	Endothelial differentiation-related factor 1 OS=Homo sapiens OX=9606 GN=EDF1 PE=1 SV=1	EDF1	ENSG00000107223.12	55	4	0.782097	0.00956907	3.81326e+06	3.96374e+06	3.79689e+06	3.97865e+06	4.53235e+06	6.05146e+06	5.11276e+06	4.83102e+06	3.38854e+06	3.27481e+06	3.28931e+06	3.28912e+06	110310	1.84899e+06	4.48497e+06	5.11276e+06	4.19805e+06	1.81124e+06	4	4	4	4	4	4	4	4	4	4	High	High	High	High	Peak Found	High	High	High	High	High	27	16.663	19.37
High	Q9BY50	Signal peptidase complex catalytic subunit SEC11C OS=Homo sapiens OX=9606 GN=SEC11C PE=1 SV=3	SEC11C	ENSG00000166562.8	29	3	1.32581	0.00961501	1.74708e+06	1.84227e+06	1.85356e+06	1.49735e+06	1.50973e+06	1.32488e+06	1.3824e+06	1.31788e+06	1.55249e+06	1.52207e+06	1.60577e+06	1.23785e+06		615901	981918	1.3824e+06	1.14521e+06	789412	3	3	3	3		3	3	3	3	3	High	High	High	High	Not Found	High	High	High	High	High	20	10.234	2.77
High	O75152	Zinc finger CCCH domain-containing protein 11A OS=Homo sapiens OX=9606 GN=ZC3H11A PE=1 SV=3	ZC3H11A	ENSG00000058673.16; ENSG00000257315.2	3	2	0.840193	0.00966304	850221	870129	836679	981694	1.02279e+06	982052	1.02477e+06	1.03022e+06	755523	718894	724830	811559	17321.5	417252	727837	1.02477e+06	895236	421123	2	2	2	2	1	2	2	2	2	2	Peak Found	Peak Found	Peak Found	Peak Found	Peak Found	Peak Found	High	High	Peak Found	Peak Found	3	6.942	0
High	Q08170	Serine/arginine-rich splicing factor 4 OS=Homo sapiens OX=9606 GN=SRSF4 PE=1 SV=2	SRSF4	ENSG00000116350.16	126	4	0.912128	0.00966545	2.21008e+06	2.46472e+06	2.37076e+06	2.4181e+06	2.67533e+06	2.63286e+06	2.51295e+06	2.61735e+06	1.96392e+06	2.03633e+06	2.05383e+06	1.99903e+06		1.09141e+06	1.95131e+06	2.51295e+06	2.27442e+06	686808	5	5	5	5		5	5	5	5	3	High	High	High	High	Not Found	High	High	High	High	High	18	41.249	123.3
High	O15371	Eukaryotic translation initiation factor 3 subunit D OS=Homo sapiens OX=9606 GN=EIF3D PE=1 SV=1	EIF3D	ENSG00000100353.17	188	16	0.849385	0.00969647	1.77761e+07	2.22656e+07	2.00188e+07	1.99459e+07	2.32132e+07	2.38381e+07	2.38767e+07	2.31008e+07	1.57962e+07	1.83957e+07	1.73426e+07	1.64891e+07	379041	9.46992e+06	1.76674e+07	2.38767e+07	2.00741e+07	1.34748e+07	17	16	17	17	7	17	16	17	16	17	High	High	High	High	Peak Found	High	High	High	High	High	42	98.944	226.97
High	O95166	Gamma-aminobutyric acid receptor-associated protein OS=Homo sapiens OX=9606 GN=GABARAP PE=1 SV=1	GABARAP	ENSG00000170296.9	13	2	2.00964	0.00980042	1.59522e+06	1.92967e+06	1.83965e+06	1.70454e+06	1.53647e+06	746307	1.01729e+06	693967	1.41754e+06	1.59428e+06	1.59372e+06	1.40913e+06	27561.9	626808	553117	1.01729e+06	603042	316572	2	2	2	2	1	2	1	2	2	1	High	High	High	High	Peak Found	High	High	Peak Found	High	Peak Found	21	11.314	1.73
High	O15498	Synaptobrevin homolog YKT6 OS=Homo sapiens OX=9606 GN=YKT6 PE=1 SV=1	YKT6	ENSG00000106636.7	25	6	0.642292	0.00992268	1.95895e+06	2.28268e+06	1.47696e+06	1.55159e+06	2.30114e+06	2.6961e+06	2.76954e+06	2.9381e+06	1.74076e+06	1.88593e+06	1.27951e+06	1.28269e+06	21520.2	938759	1.99819e+06	2.76954e+06	2.55314e+06	1.71022e+06	5	5	4	4	1	5	5	5	5	4	High	High	High	High	Peak Found	High	High	High	High	High	38	20.125	2.02
High	Q13409	Cytoplasmic dynein 1 intermediate chain 2 OS=Homo sapiens OX=9606 GN=DYNC1I2 PE=1 SV=3	DYNC1I2	ENSG00000077380.15	59	9	0.816372	0.00993727	1.78554e+07	2.0446e+07	1.86917e+07	1.86469e+07	2.01702e+07	2.35603e+07	2.30444e+07	2.26929e+07	1.58667e+07	1.68924e+07	1.6193e+07	1.54152e+07	409246	8.22852e+06	1.74615e+07	2.30444e+07	1.97196e+07	1.3085e+07	9	9	10	8	3	9	9	10	9	9	High	High	High	High	Peak Found	High	High	High	High	High	24	52.395	38.4
High	Q9ULE6	Paladin OS=Homo sapiens OX=9606 GN=PALD1 PE=1 SV=3	PALD1	ENSG00000107719.8	10	3	0.829376	0.00993941	631022	726307	728167	632534	825530	812858	806376	963923	560739	600069	630824	522911		336779	602440	806376	837628	439016	3	3	3	3		3	3	3	3	3	High	High	High	High	Not Found	High	Peak Found	High	High	High	5	10.101	0
High	Q9NWW5	Ceroid-lipofuscinosis neuronal protein 6 OS=Homo sapiens OX=9606 GN=CLN6 PE=1 SV=1	CLN6	ENSG00000128973.12	8	2	4.77032	0.00996018	492598	477447	506104	494340	124859	82032.5	75213.7	429580	437733	394463	438447	408667		50936.7	60797.5	75213.7	373296	243241	2	2	2	2		1	1	1	2	2	High	High	High	High	Not Found	Peak Found	High	Peak Found	Peak Found	High	10	5.906	0
High	P15529	Membrane cofactor protein OS=Homo sapiens OX=9606 GN=CD46 PE=1 SV=3	CD46	ENSG00000117335.19	12	3	1.2585	0.00997846	5.14999e+06	6.3948e+06	6.2211e+06	5.59384e+06	4.55887e+06	4.93687e+06	4.82923e+06	4.40197e+06	4.57638e+06	5.28333e+06	5.38945e+06	4.62439e+06	28037.9	1.85981e+06	3.6589e+06	4.82923e+06	3.82521e+06	1.73475e+06	3	3	3	3	1	3	3	3	3	3	High	High	High	High	Peak Found	Peak Found	Peak Found	High	High	High	10	9.353	5.1
High	Q14249	Endonuclease G, mitochondrial OS=Homo sapiens OX=9606 GN=ENDOG PE=1 SV=4	ENDOG	ENSG00000167136.6	2	2	0.873775	0.0100947	259255	290402	298901	309659	325585	368345	337694	336739	230379	239928	258943	255993		132824	272994	337694	292619	156642	2	1	2	2		2	2	2	2	1	Peak Found	Peak Found	Peak Found	Peak Found	Not Found	Peak Found	Peak Found	High	Peak Found	Peak Found	8	3.97	0
High	Q92769	Histone deacetylase 2 OS=Homo sapiens OX=9606 GN=HDAC2 PE=1 SV=2	HDAC2	ENSG00000196591.11	68	4	0.664605	0.0101357	1.837e+06	2.16758e+06	2.01374e+06	1.88713e+06	3.38004e+06	2.26145e+06	3.0045e+06	2.86496e+06	1.6324e+06	1.79084e+06	1.74454e+06	1.56008e+06	19535.1	1.3789e+06	1.67605e+06	3.0045e+06	2.48959e+06	1.48888e+06	4	4	4	4	1	4	4	4	4	3	High	High	High	High	Peak Found	High	High	High	High	High	28	33.563	47.63
High	P25205	DNA replication licensing factor MCM3 OS=Homo sapiens OX=9606 GN=MCM3 PE=1 SV=3	MCM3	ENSG00000112118.18	437	35	0.896375	0.0101446	5.6748e+07	6.74826e+07	6.56843e+07	6.50291e+07	7.14664e+07	7.19531e+07	7.38714e+07	7.55698e+07	5.04274e+07	5.57536e+07	5.69035e+07	5.3759e+07	1.37094e+06	2.9155e+07	5.33272e+07	7.38714e+07	6.56685e+07	3.99319e+07	35	35	35	35	22	34	35	35	35	35	High	High	High	High	Peak Found	High	High	High	High	High	53	203.019	511.32
High	P05386	60S acidic ribosomal protein P1 OS=Homo sapiens OX=9606 GN=RPLP1 PE=1 SV=1	RPLP1	ENSG00000137818.11	20	3	0.470935	0.0102763	2.26237e+06	3.27208e+06	3.03377e+06	2.74244e+06	9.66919e+06	6.82335e+06	5.07381e+06	5.44205e+06	2.01039e+06	2.70337e+06	2.62821e+06	2.26715e+06	296858	3.94459e+06	5.05705e+06	5.07381e+06	4.72902e+06	6.06379e+06	2	3	2	3	3	3	3	3	3	3	High	High	High	High	Peak Found	High	High	High	High	High	75	32.313	19.14
High	Q5RI15	Cytochrome c oxidase assembly protein COX20, mitochondrial OS=Homo sapiens OX=9606 GN=COX20 PE=1 SV=2	COX20	ENSG00000203667.9	14	2	0.765974	0.0104865	1.44134e+06	1.44056e+06	1.63022e+06	1.53204e+06	1.6225e+06	2.0439e+06	1.91561e+06	1.96622e+06	1.2808e+06	1.19018e+06	1.41229e+06	1.26653e+06	22782.5	661904	1.51482e+06	1.91561e+06	1.7086e+06	1.2448e+06	2	2	2	2	1	2	2	2	2	2	High	High	Peak Found	High	Peak Found	Peak Found	High	High	High	High	22	9.141	6.32
High	Q15031	Probable leucine--tRNA ligase, mitochondrial OS=Homo sapiens OX=9606 GN=LARS2 PE=1 SV=2	LARS2	ENSG00000011376.9	15	4	1.43794	0.0105316	1.46014e+06	1.452e+06	1.36957e+06	1.29195e+06	828610	1.13362e+06	1.19224e+06	780588	1.29751e+06	1.19963e+06	1.18648e+06	1.06805e+06		338035	840166	1.19224e+06	678314	705552	4	4	4	4		3	3	4	3	4	High	High	High	High	Not Found	Peak Found	Peak Found	High	High	High	7	14.351	0
High	Q9NNW5	WD repeat-containing protein 6 OS=Homo sapiens OX=9606 GN=WDR6 PE=1 SV=1	WDR6	ENSG00000178252.17	6	3	0.404468	0.0105484	259754	421965	242490	220349	673285	389912	590969	650769	230823	348624	210073	182161		274669	288979	590969	565504	471408	1	2	1	1		2	1	2	2	2	High	Peak Found	High	Peak Found	Not Found	Peak Found	Peak Found	High	High	Peak Found	7	14.41	0
High	Q86UK7	E3 ubiquitin-protein ligase ZNF598 OS=Homo sapiens OX=9606 GN=ZNF598 PE=1 SV=1	ZNF598		16	4	0.741142	0.0106369	699755	859997	926427	850276	1.32464e+06	1.25186e+06	1.01159e+06	1.05576e+06	621816	710523	802580	702917		540391	927799	1.01159e+06	917432	491727	3	4	4	4		3	4	3	3	3	Peak Found	High	High	Peak Found	Not Found	High	High	High	High	Peak Found	6	15.779	4.15
High	P61619	Protein transport protein Sec61 subunit alpha isoform 1 OS=Homo sapiens OX=9606 GN=SEC61A1 PE=1 SV=2	SEC61A1	ENSG00000058262.9	36	5	0.783766	0.0106536	7.73005e+06	9.42652e+06	8.38953e+06	9.64333e+06	1.02751e+07	1.15001e+07	1.31749e+07	1.12313e+07	6.86907e+06	7.78812e+06	7.26799e+06	7.97206e+06	232437	4.19179e+06	8.52314e+06	1.31749e+07	9.75973e+06	7.92617e+06	5	5	5	5	4	5	5	5	5	5	High	High	High	High	Peak Found	High	High	High	High	High	13	18.479	13.73
High	P00558	Phosphoglycerate kinase 1 OS=Homo sapiens OX=9606 GN=PGK1 PE=1 SV=3	PGK1	ENSG00000102144.13	763	23	1.17891	0.0106779	2.5865e+08	2.8689e+08	2.89811e+08	2.6061e+08	2.12892e+08	2.36875e+08	2.5064e+08	2.27536e+08	2.29842e+08	2.37026e+08	2.51068e+08	2.15444e+08	7.31492e+06	8.68503e+07	1.75557e+08	2.5064e+08	1.97724e+08	1.05648e+08	30	29	29	30	19	30	29	30	30	29	High	High	High	High	High	High	High	High	High	High	69	230.35	960.11
High	O96000	NADH dehydrogenase [ubiquinone] 1 beta subcomplex subunit 10 OS=Homo sapiens OX=9606 GN=NDUFB10 PE=1 SV=3	NDUFB10	ENSG00000140990.14	39	3	1.1851	0.010761	4.71e+06	5.43615e+06	5.55021e+06	4.88189e+06	4.29454e+06	4.485e+06	4.41192e+06	3.98624e+06	4.1854e+06	4.49131e+06	4.80825e+06	4.03582e+06	207457	1.75198e+06	3.32401e+06	4.41192e+06	3463953	1.82888e+06	3	3	3	3	3	3	3	3	3	3	High	High	High	High	High	High	High	High	High	High	21	12.487	24.08
High	P06576	ATP synthase subunit beta, mitochondrial OS=Homo sapiens OX=9606 GN=ATP5F1B PE=1 SV=3	ATP5B	ENSG00000110955.8	1780	24	1.19282	0.0108815	3.75509e+08	4.1666e+08	4.27061e+08	3.73786e+08	3.57453e+08	2.93277e+08	3.31769e+08	3.32343e+08	3.33685e+08	3.44241e+08	3.69971e+08	3.09006e+08	9.64402e+06	1.45824e+08	2.17359e+08	3.31769e+08	2.88798e+08	1.42213e+08	43	43	43	45	27	45	40	41	45	43	High	High	High	High	High	High	High	High	High	High	75	454.047	2350.15
High	P23368	NAD-dependent malic enzyme, mitochondrial OS=Homo sapiens OX=9606 GN=ME2 PE=1 SV=1	ME2	ENSG00000082212.12	149	15	1.17122	0.0109444	2.47269e+07	2.78144e+07	2.65065e+07	2.55883e+07	2.30949e+07	2.06916e+07	2.42645e+07	2.1384e+07	2.19728e+07	2.298e+07	2.2963e+07	2.11536e+07	525068	9.42165e+06	1.53354e+07	2.42645e+07	1.85823e+07	1.12869e+07	15	15	15	15	9	15	13	16	14	14	High	High	High	High	Peak Found	High	High	High	High	High	41	89.81	164.67
High	Q9Y2J2	Band 4.1-like protein 3 OS=Homo sapiens OX=9606 GN=EPB41L3 PE=1 SV=2	EPB41L3	ENSG00000082397.17	19	3	1.22914	0.010959	868164	1.0122e+06	884121	878259	659488	702258	731571	829429	771468	836268	765929	726050		269041	520470	731571	720756	393025	3	3	3	3		3	3	3	3	3	High	Peak Found	High	High	Not Found	Peak Found	High	High	High	Peak Found	5	14.229	1.67
High	Q9BRT3	Migration and invasion enhancer 1 OS=Homo sapiens OX=9606 GN=MIEN1 PE=1 SV=1	MIEN1	ENSG00000141741.11	9	2	1.41804	0.0109921	1.09801e+06	1.21068e+06	1.24081e+06	1.15546e+06	628884	987343	972284	696316	975710	1.00025e+06	1.07494e+06	955208		256556	731758	972284	605083	476662	2	2	2	2		2	2	2	2	2	High	High	High	High	Not Found	Peak Found	High	High	Peak Found	Peak Found	30	7.543	5.39
High	Q92879	CUGBP Elav-like family member 1 OS=Homo sapiens OX=9606 GN=CELF1 PE=1 SV=2	CELF1	ENSG00000149187.17	35	5	0.765032	0.0110794	2.16065e+06	2.13762e+06	2.14894e+06	2.46986e+06	2.60319e+06	2.53601e+06	3.03002e+06	3.05823e+06	1.92e+06	1.76608e+06	1.86166e+06	2.04182e+06		1.06198e+06	1.87954e+06	3.03002e+06	2.65754e+06	1.30524e+06	5	4	5	5		5	5	5	5	5	High	High	High	High	Not Found	High	High	High	High	High	13	22.549	12.18
High	Q9BUL8	Programmed cell death protein 10 OS=Homo sapiens OX=9606 GN=PDCD10 PE=1 SV=1	PDCD10	ENSG00000114209.14	25	5	1.83067	0.0110986	4.58649e+06	4.76487e+06	2.83913e+06	4.71958e+06	2.3419e+06	2.42991e+06	2.65352e+06	2.66121e+06	4.07565e+06	3.9367e+06	2.45959e+06	3.90164e+06	26419	955389	1.8009e+06	2.65352e+06	2.31254e+06	2.75546e+06	5	5	5	5	1	4	3	5	5	5	High	High	High	High	Peak Found	High	Peak Found	High	High	High	33	18.014	7.31
High	P40939	Trifunctional enzyme subunit alpha, mitochondrial OS=Homo sapiens OX=9606 GN=HADHA PE=1 SV=2	HADHA	ENSG00000084754.10	357	25	1.1598	0.011113	4.30351e+07	4.88665e+07	4.42619e+07	4.65439e+07	4.26935e+07	3.82268e+07	3.91819e+07	3.91123e+07	3.82419e+07	4.03731e+07	3.83449e+07	3.84775e+07	923682	1.7417e+07	2.83313e+07	3.91819e+07	3.39877e+07	2.03191e+07	28	27	27	29	17	28	29	27	27	27	High	High	High	High	Peak Found	High	High	High	High	High	48	179.735	395.44
High	Q13620	Cullin-4B OS=Homo sapiens OX=9606 GN=CUL4B PE=1 SV=4	CUL4B	ENSG00000158290.16	82	9	1.24508	0.0111232	3.67947e+06	4.45087e+06	4.66021e+06	4.17842e+06	3.46633e+06	3.36583e+06	3.46437e+06	3.55479e+06	3.26965e+06	3.67727e+06	4.03722e+06	3.45427e+06		1.4141e+06	2.49454e+06	3.46437e+06	3.08904e+06	2.24863e+06	8	8	8	8		9	7	8	8	8	High	High	High	High	Not Found	Peak Found	High	High	High	High	18	50.899	9.63
High	Q6DKK2	Tetratricopeptide repeat protein 19, mitochondrial OS=Homo sapiens OX=9606 GN=TTC19 PE=1 SV=4	TTC19	ENSG00000011295.15	28	7	1.3201	0.0111501	4.61366e+06	5.97901e+06	5.93799e+06	5.44875e+06	4.20424e+06	4.42145e+06	4.48919e+06	4.00144e+06	4.09979e+06	4.93982e+06	5.14418e+06	4.50444e+06		1.71514e+06	3.2769e+06	4.48919e+06	3.47716e+06	2.48703e+06	6	7	7	7		7	7	7	6	7	High	High	High	High	Not Found	High	High	High	High	High	22	27.203	25.9
High	P08183	ATP-dependent translocase ABCB1 OS=Homo sapiens OX=9606 GN=ABCB1 PE=1 SV=3	ABCB1	ENSG00000085563.14	27	7	0.745678	0.0113096	3.93865e+06	4.7744e+06	4.78507e+06	4.73457e+06	7.11844e+06	5.63368e+06	7.12894e+06	5.49828e+06	3.49996e+06	3.94458e+06	4.14539e+06	3.91403e+06	22505.3	2.904e+06	4.17534e+06	7.12894e+06	4.77789e+06	1.73616e+06	5	4	5	5	1	6	6	6	6	6	High	High	High	High	Peak Found	High	High	High	High	High	8	26.646	8.81
High	Q9NVH1	DnaJ homolog subfamily C member 11 OS=Homo sapiens OX=9606 GN=DNAJC11 PE=1 SV=2	DNAJC11	ENSG00000007923.15	9	3	0.701443	0.0113271	669852	796886	753962	685913	821512	1.09522e+06	957517	1.12547e+06	595244	658381	653171	567039		335139	811707	957517	978012	614673	2	2	2	2		2	2	2	2	2	Peak Found	High	High	Peak Found	Not Found	Peak Found	High	Peak Found	High	High	8	13.522	1.86
High	P62899	60S ribosomal protein L31 OS=Homo sapiens OX=9606 GN=RPL31 PE=1 SV=1	RPL31	ENSG00000071082.10	144	4	0.778801	0.0114349	4.76116e+07	5.51186e+07	5.19257e+07	5.53275e+07	5.63947e+07	7.14197e+07	6.76811e+07	6.97665e+07	4.23086e+07	4.55386e+07	4.49842e+07	4.57388e+07	902506	2.30065e+07	5.29319e+07	6.76811e+07	60625540	1.63809e+07	4	4	4	4	4	4	4	4	4	4	High	High	High	High	High	High	High	High	High	High	30	24.802	196.06
High	P62249	40S ribosomal protein S16 OS=Homo sapiens OX=9606 GN=RPS16 PE=1 SV=2	RPS16	ENSG00000105193.8	222	8	0.769746	0.011536	4.98891e+07	5.10586e+07	5.23836e+07	5.40489e+07	5.48011e+07	6.8739e+07	6.56459e+07	7.07271e+07	4.43324e+07	4.21843e+07	4.53808e+07	4.46818e+07	1.65361e+06	2.23563e+07	5.09451e+07	6.56459e+07	6.14603e+07	4.31024e+07	10	10	9	10	7	10	9	10	10	10	High	High	High	High	High	High	High	High	High	High	53	38.69	278.21
High	Q9UQB8	Brain-specific angiogenesis inhibitor 1-associated protein 2 OS=Homo sapiens OX=9606 GN=BAIAP2 PE=1 SV=1	BAIAP2	ENSG00000175866.15	25	7	0.633155	0.0116056	1.54192e+06	1.74923e+06	1.64035e+06	1.79086e+06	2.98365e+06	2.36982e+06	3.61946e+06	2.27897e+06	1.37018e+06	1.4452e+06	1.42106e+06	1.48049e+06	16993.3	1.21719e+06	1.75637e+06	3.61946e+06	1.98037e+06	1.06628e+06	5	5	5	5	1	6	5	6	5	5	High	High	High	High	Peak Found	High	High	High	High	High	16	24.189	17.23
High	Q9Y287	Integral membrane protein 2B OS=Homo sapiens OX=9606 GN=ITM2B PE=1 SV=1	ITM2B	ENSG00000136156.12	46	6	1.36082	0.0116273	7.05147e+06	8.78248e+06	9.26341e+06	7.99419e+06	5.71943e+06	6.60892e+06	6.84213e+06	5.40279e+06	6.26608e+06	7.25602e+06	8.02505e+06	6.60874e+06	174655	2.33326e+06	4.89812e+06	6.84213e+06	4.69491e+06	3.91965e+06	6	6	6	6	3	5	5	5	5	5	High	High	High	High	Peak Found	High	High	High	High	High	39	38.985	54.53
High	Q15691	Microtubule-associated protein RP/EB family member 1 OS=Homo sapiens OX=9606 GN=MAPRE1 PE=1 SV=3	MAPRE1	ENSG00000101367.8	89	9	0.906771	0.0116614	9.17249e+06	1.0282e+07	1.06012e+07	9.84129e+06	1.1755e+07	1.10219e+07	1.10501e+07	1.11422e+07	8.15086e+06	8.49489e+06	9.18399e+06	8.13572e+06	254387	4.7955e+06	8.16878e+06	1.10501e+07	9.68228e+06	5.63762e+06	7	7	8	7	6	8	8	8	8	8	High	High	High	High	Peak Found	High	High	High	High	High	53	51.137	64.45
High	P07384	Calpain-1 catalytic subunit OS=Homo sapiens OX=9606 GN=CAPN1 PE=1 SV=1	CAPN1	ENSG00000014216.15	379	29	1.15085	0.0117216	5.0621e+07	5.6947e+07	5.83575e+07	5.65851e+07	5.04041e+07	4.78455e+07	4.94047e+07	4.92459e+07	4.49828e+07	4.70492e+07	5.05561e+07	4.67785e+07	1.34039e+06	2.05626e+07	3.54601e+07	4.94047e+07	4.27936e+07	3.05111e+07	31	30	31	31	17	30	29	30	30	28	High	High	High	High	High	High	High	High	High	High	52	149.255	341.94
High	Q15181	Inorganic pyrophosphatase OS=Homo sapiens OX=9606 GN=PPA1 PE=1 SV=2	PPA1	ENSG00000180817.11	253	14	1.1589	0.0117955	4.36375e+07	4.4391e+07	4.89783e+07	4.74218e+07	3.9872e+07	3.95413e+07	3.9683e+07	3.17579e+07	3.87771e+07	3.66755e+07	4.24307e+07	3.92032e+07	881563	1.62659e+07	2.93056e+07	3.9683e+07	2.75969e+07	2.43935e+07	16	15	16	16	10	16	16	16	16	15	High	High	High	High	Peak Found	High	High	High	High	High	71	119.419	319.37
High	Q92522	Histone H1.10 OS=Homo sapiens OX=9606 GN=H1-10 PE=1 SV=1	H1FX	ENSG00000184897.5	27	4	0.862577	0.0118196	4.84769e+06	4.69002e+06	4.5809e+06	5.39314e+06	5.5616e+06	5.49563e+06	5.47119e+06	5.86644e+06	4.30776e+06	3.87486e+06	3.96851e+06	4.45847e+06	44524	2.26888e+06	4.07302e+06	5.47119e+06	5.09781e+06	1.49939e+06	4	3	3	4	2	4	3	3	4	2	High	High	High	High	Peak Found	High	High	High	High	High	27	21.641	17.99
High	P36405	ADP-ribosylation factor-like protein 3 OS=Homo sapiens OX=9606 GN=ARL3 PE=1 SV=2	ARL3	ENSG00000138175.8	4	2	0.752316	0.0119008	652639	735848	475569	736512	997127	987692	829340	857924	579948	607952	411994	608869	23204.4	406782	732016	829340	745517	340650	2	2	1	2	1	2	2	2	2	2	High	High	Peak Found	Peak Found	Peak Found	Peak Found	High	High	Peak Found	Peak Found	16	6.563	0
High	Q9BVC6	Transmembrane protein 109 OS=Homo sapiens OX=9606 GN=TMEM109 PE=1 SV=1	TMEM109	ENSG00000110108.9	30	3	0.814581	0.0119142	3.31148e+06	3.7237e+06	3.87907e+06	3.47685e+06	4.77862e+06	4.65452e+06	3.99152e+06	4.18504e+06	2.94265e+06	3.07649e+06	3.36051e+06	2.87429e+06	104957	1.94946e+06	3.44965e+06	3.99152e+06	3.63671e+06	2.78572e+06	3	3	3	3	2	3	3	3	3	3	High	High	High	High	Peak Found	High	High	High	High	High	9	13.446	17.37
High	Q9H845	Complex I assembly factor ACAD9, mitochondrial OS=Homo sapiens OX=9606 GN=ACAD9 PE=1 SV=1	ACAD9	ENSG00000177646.18	36	9	1.20759	0.0120597	4.38986e+06	4.06344e+06	4.75267e+06	4.80894e+06	3.78246e+06	3.78846e+06	3.16261e+06	3.87898e+06	3.90092e+06	3.35718e+06	4.11732e+06	3.97551e+06	40406.2	1.54307e+06	2.80777e+06	3.16261e+06	3370749	2.31835e+06	9	8	9	9	2	8	9	8	9	9	High	High	High	High	Peak Found	High	High	High	High	High	22	37.343	8.55
High	Q7L2J0	7SK snRNA methylphosphate capping enzyme OS=Homo sapiens OX=9606 GN=MEPCE PE=1 SV=1	MEPCE	ENSG00000146834.13	5	3	1.64757	0.0120786	623611	719332	735654	808875	159386	507882	375227	526852	554153	594307	637310	668691		65022	376411	375227	457823	78680.6	2	2	2	2		1	2	2	2	1	High	Peak Found	High	High	Not Found	Peak Found	Peak Found	High	Peak Found	Peak Found	12	5.74	0
High	Q9H6S3	Epidermal growth factor receptor kinase substrate 8-like protein 2 OS=Homo sapiens OX=9606 GN=EPS8L2 PE=1 SV=2	EPS8L2	ENSG00000177106.14	110	14	0.916202	0.0121481	8.42542e+06	8.78815e+06	9.12531e+06	8.80433e+06	1.02553e+07	9.47478e+06	9.28804e+06	9.72675e+06	7.487e+06	7.2607e+06	7.90541e+06	7.27847e+06	161863	4.1837e+06	7.02213e+06	9.28804e+06	8.45233e+06	4.88509e+06	14	13	14	14	4	14	14	14	13	14	High	High	High	High	Peak Found	High	High	High	High	High	31	74.281	84.55
High	Q13257	Mitotic spindle assembly checkpoint protein MAD2A OS=Homo sapiens OX=9606 GN=MAD2L1 PE=1 SV=1	MAD2L1	ENSG00000164109.13	47	8	0.842404	0.0123157	4.57835e+06	5.59407e+06	5.10905e+06	5.31964e+06	6.04282e+06	5.6657e+06	6.33687e+06	6.34721e+06	4.06841e+06	4.62178e+06	4426063	4.39771e+06	52110.8	2.4652e+06	4.19907e+06	6.33687e+06	5.51559e+06	3.25598e+06	8	8	8	8	3	7	7	7	7	7	High	High	High	High	Peak Found	High	High	High	High	High	51	39.728	34.01
High	Q14166	Tubulin--tyrosine ligase-like protein 12 OS=Homo sapiens OX=9606 GN=TTLL12 PE=1 SV=2	TTLL12	ENSG00000100304.12	197	20	1.1827	0.0123166	2.03721e+07	2.27084e+07	2.11471e+07	2.24413e+07	2.0383e+07	1.78875e+07	1.89674e+07	1.75956e+07	1.81031e+07	1.87615e+07	1.83201e+07	1.8552e+07	322495	8.31535e+06	1.32571e+07	1.89674e+07	1.52902e+07	9.53538e+06	20	20	20	20	8	18	20	20	19	20	High	High	High	High	Peak Found	High	High	High	High	High	52	130.798	130.52
High	P62280	40S ribosomal protein S11 OS=Homo sapiens OX=9606 GN=RPS11 PE=1 SV=3	RPS11	ENSG00000142534.6	355	10	0.80318	0.0123952	7.64832e+07	8.66024e+07	8.58167e+07	8.52529e+07	8.90012e+07	1.09165e+08	1.03825e+08	1.12273e+08	6.79645e+07	7.15502e+07	7.43445e+07	7.04779e+07	2.72767e+06	3.63084e+07	8.09066e+07	1.03825e+08	9.75628e+07	5.77143e+07	12	12	12	12	10	12	12	12	12	12	High	High	High	High	High	High	High	High	High	High	56	52.126	358.44
High	P00367	Glutamate dehydrogenase 1, mitochondrial OS=Homo sapiens OX=9606 GN=GLUD1 PE=1 SV=2	GLUD1	ENSG00000148672.8	149	16	1.20706	0.0124119	2.35482e+07	2.78753e+07	2.71987e+07	2.51866e+07	1.91189e+07	2.20597e+07	2.30642e+07	2.13393e+07	2.09254e+07	2.30304e+07	2.35627e+07	2.08216e+07	561792	7.79963e+06	1.63493e+07	2.30642e+07	1.85433e+07	1.10561e+07	15	15	14	14	8	15	15	15	15	15	High	High	High	High	Peak Found	High	High	High	High	High	37	66.117	128.79
High	P17612	cAMP-dependent protein kinase catalytic subunit alpha OS=Homo sapiens OX=9606 GN=PRKACA PE=1 SV=2	PRKACA	ENSG00000072062.13	9	2	0.808474	0.0125327	1.33989e+06	1.62367e+06	1.7517e+06	1.5328e+06	2.18592e+06	1.88651e+06	2.01772e+06	1.82157e+06	1.19065e+06	1.34146e+06	1.51753e+06	1.26715e+06	18411.6	891757	1.39816e+06	2.01772e+06	1.58291e+06	1.31551e+06	2	2	2	2	1	2	2	2	2	2	High	Peak Found	High	High	Peak Found	Peak Found	High	High	High	High	9	9.785	7.03
High	Q15418	Ribosomal protein S6 kinase alpha-1 OS=Homo sapiens OX=9606 GN=RPS6KA1 PE=1 SV=2	RPS6KA1	ENSG00000281877.2; ENSG00000117676.13	54	4	0.766728	0.01261	1.72126e+06	2.05739e+06	2.01341e+06	1.96055e+06	2.09316e+06	2.75796e+06	2.60204e+06	2.58096e+06	1.52955e+06	1.6998e+06	1.74425e+06	1.62077e+06	21175	853915	2.04403e+06	2.60204e+06	2.2428e+06	1.53683e+06	4	4	4	4	1	4	4	4	4	4	High	High	High	High	Peak Found	High	High	High	High	High	13	32.724	9.25
High	Q9UG63	ATP-binding cassette sub-family F member 2 OS=Homo sapiens OX=9606 GN=ABCF2 PE=1 SV=2	ABCF2	ENSG00000033050.7	27	7	0.674325	0.0127141	2.08557e+06	2.28965e+06	2.22539e+06	2.10667e+06	3.10928e+06	3.20354e+06	4.75397e+06	3.22075e+06	1.85328e+06	1.89169e+06	1.92789e+06	1.74157e+06	51591.1	1.26844e+06	2.37427e+06	4.75397e+06	2.79876e+06	1.9558e+06	6	6	6	6	2	6	6	7	6	6	High	High	High	High	Peak Found	High	High	High	High	High	13	24.703	4.45
High	Q96IU4	Protein ABHD14B OS=Homo sapiens OX=9606 GN=ABHD14B PE=1 SV=1	ABHD14B	ENSG00000114779.19	90	8	1.28079	0.0127321	1.35105e+07	1.53381e+07	1.72312e+07	1.56174e+07	1.24658e+07	1.17033e+07	1.35359e+07	1.15407e+07	1.20057e+07	1.26722e+07	1.49277e+07	1.29108e+07	366817	5.08548e+06	8.67373e+06	1.35359e+07	1.00286e+07	8.2482e+06	9	9	9	9	5	9	9	9	8	9	High	High	High	High	Peak Found	High	High	High	High	High	57	49.961	104.05
High	Q9GZU8	PSME3-interacting protein OS=Homo sapiens OX=9606 GN=PSME3IP1 PE=1 SV=1	FAM192A	ENSG00000172775.16	2	2	0.711694	0.0127957	190534	258718	172492	200316	309276	262164	279348	269834	169312	213751	149433	165600		126170	194300	279348	234480		1	1	1	1		1	1	1	1		Peak Found	Peak Found	Peak Found	Peak Found	Not Found	Peak Found	Peak Found	High	Peak Found	Not Found	10	4.033	0
High	O95816	BAG family molecular chaperone regulator 2 OS=Homo sapiens OX=9606 GN=BAG2 PE=1 SV=1	BAG2	ENSG00000112208.11	43	6	0.798313	0.0128069	2.86218e+06	2.97848e+06	3.18218e+06	3.38691e+06	4.08226e+06	3.63484e+06	4.25462e+06	3.47511e+06	2.54339e+06	2.4608e+06	2.75678e+06	2.79993e+06		1.66537e+06	2693918	4.25462e+06	3.01979e+06	3.613e+06	5	4	4	6		5	5	5	5	5	High	High	High	High	Not Found	High	High	High	High	High	30	22.247	20.16
High	O43615	Mitochondrial import inner membrane translocase subunit TIM44 OS=Homo sapiens OX=9606 GN=TIMM44 PE=1 SV=2	TIMM44	ENSG00000104980.7	125	11	0.863702	0.0128795	1.21465e+07	1.38744e+07	1.35844e+07	1.25716e+07	1.68355e+07	1.52054e+07	1.43544e+07	1.50783e+07	1.07936e+07	1.14629e+07	1.17684e+07	1.03929e+07	187447	6.86812e+06	1.12693e+07	1.43544e+07	1.31027e+07	8.871e+06	11	11	11	11	5	11	11	11	11	11	High	High	High	High	Peak Found	High	High	High	High	High	31	54.004	117.49
High	Q9NZM1	Myoferlin OS=Homo sapiens OX=9606 GN=MYOF PE=1 SV=1	MYOF	ENSG00000138119.16	2	2	1.47243	0.012895	1.59123e+06	2.12617e+06	2.10853e+06	2.04277e+06	1.33324e+06	1.39545e+06	1.4239e+06	1.66866e+06	1.414e+06	1.75662e+06	1.82666e+06	1.68874e+06	36670.1	543901	1.03422e+06	1.4239e+06	1.45003e+06	469961	1	2	2	2	1	1	1	1	1	1	Peak Found	High	Peak Found	High	Peak Found	Peak Found	Peak Found	Peak Found	Peak Found	Peak Found	1	6.145	1.84
High	Q04206	Transcription factor p65 OS=Homo sapiens OX=9606 GN=RELA PE=1 SV=2	RELA	ENSG00000173039.18	13	4	1.16279	0.0129885	1.31905e+06	1.40375e+06	1.44176e+06	1.25759e+06	1.10876e+06	1.25212e+06	1.15025e+06	1.19135e+06	1.17213e+06	1.15977e+06	1.24903e+06	1.03964e+06		452325	927995	1.15025e+06	1.03526e+06	561405	3	3	3	3		3	3	3	3	3	High	High	High	High	Not Found	Peak Found	High	High	High	Peak Found	10	13.202	1.63
High	P62330	ADP-ribosylation factor 6 OS=Homo sapiens OX=9606 GN=ARF6 PE=1 SV=2	ARF6	ENSG00000165527.6	39	4	0.829824	0.0129915	2.59524e+06	2.65947e+06	2.54877e+06	2.59635e+06	3.63316e+06	2.86469e+06	3.01558e+06	3.24067e+06	2.30618e+06	2.19724e+06	2.20805e+06	2.14638e+06	41848.6	1.48216e+06	2.12313e+06	3.01558e+06	2.81607e+06	1.72865e+06	4	4	4	4	1	4	4	4	4	4	High	High	High	High	Peak Found	High	High	High	High	High	34	17.564	23.12
High	O75821	Eukaryotic translation initiation factor 3 subunit G OS=Homo sapiens OX=9606 GN=EIF3G PE=1 SV=2	EIF3G	ENSG00000130811.11	123	8	0.857603	0.0130196	1.77807e+07	2.00494e+07	1.93015e+07	1.89135e+07	2.02981e+07	2.31399e+07	2.34301e+07	2.14203e+07	1.58003e+07	1.65647e+07	1.67212e+07	1.56356e+07	313815	8.28067e+06	1.71499e+07	2.34301e+07	1.86137e+07	8.01095e+06	8	8	8	8	5	8	8	8	8	8	High	High	High	High	Peak Found	High	High	High	High	High	40	48.973	164.69
High	O60841	Eukaryotic translation initiation factor 5B OS=Homo sapiens OX=9606 GN=EIF5B PE=1 SV=4	EIF5B	ENSG00000158417.10	92	17	0.837127	0.0131345	8.97887e+06	1.12017e+07	1.11032e+07	1.00259e+07	1.31411e+07	1.18025e+07	1.35286e+07	1.2099e+07	7.9788e+06	9.25477e+06	9.61893e+06	8.28832e+06	43087.2	5.36095e+06	8.74729e+06	1.35286e+07	1.05138e+07	5.64549e+06	16	17	17	16	2	17	16	17	16	15	High	High	High	High	Peak Found	High	High	High	High	High	21	72.095	44.83
High	O43676	NADH dehydrogenase [ubiquinone] 1 beta subcomplex subunit 3 OS=Homo sapiens OX=9606 GN=NDUFB3 PE=1 SV=3	NDUFB3	ENSG00000119013.8	17	3	1.42865	0.0131733	3.08495e+06	3.76056e+06	3.3364e+06	2.67573e+06	1.4401e+06	2.28777e+06	2.46233e+06	2.20691e+06	2.74135e+06	3.10695e+06	2.89038e+06	2.21201e+06	30468.2	587496	1.69556e+06	2.46233e+06	1.91776e+06	1.13639e+06	3	3	3	2	1	2	2	2	2	2	High	High	High	High	Peak Found	Peak Found	Peak Found	High	High	High	29	9.786	8.36
High	Q8TCJ2	Dolichyl-diphosphooligosaccharide--protein glycosyltransferase subunit STT3B OS=Homo sapiens OX=9606 GN=STT3B PE=1 SV=1	STT3B	ENSG00000163527.9	27	4	0.912692	0.0132763	1.82984e+06	2.02151e+06	1.99448e+06	1.93337e+06	2.07313e+06	2.28661e+06	2.11076e+06	2.19284e+06	1.62603e+06	1.67016e+06	1.72785e+06	1.5983e+06	33479.5	845743	1.69469e+06	2.11076e+06	1.90553e+06	1.33845e+06	3	3	3	3	1	3	3	3	3	3	High	High	High	High	Peak Found	High	High	High	High	High	4	9.928	0
High	Q8WXH0	Nesprin-2 OS=Homo sapiens OX=9606 GN=SYNE2 PE=1 SV=3	SYNE2	ENSG00000054654.16	2	2	1.81743	0.0133327	1.32453e+06	1.86975e+06	1.92783e+06	1.3218e+06	730856	1.07856e+06	1026726	365797	1177006	1.54478e+06	1.67012e+06	1.09272e+06	30958.3	298156	799360	1026726	317869	494229	1	1	1	1	1	1	1	1	1	1	Peak Found	Peak Found	High	Peak Found	Peak Found	Peak Found	Peak Found	Peak Found	High	Peak Found	0	4.831	0
High	P68366	Tubulin alpha-4A chain OS=Homo sapiens OX=9606 GN=TUBA4A PE=1 SV=1	TUBA4A	ENSG00000127824.13	1691	5	0.892944	0.0133993	3.97406e+07	4.26914e+07	4.32619e+07	4.22504e+07	5.33678e+07	4.54231e+07	4.7602e+07	4.75236e+07	3.53143e+07	3.52713e+07	3.74786e+07	3.49281e+07	650343	2.17716e+07	3.36648e+07	4.7602e+07	4.12969e+07	2.37447e+07	5	6	6	6	4	5	5	6	6	6	High	High	High	High	Peak Found	High	High	High	High	High	56	285.155	2298.49
High	Q9UEE9	Craniofacial development protein 1 OS=Homo sapiens OX=9606 GN=CFDP1 PE=1 SV=1	CFDP1	ENSG00000153774.8	12	3	0.777724	0.013487	839042	1.11518e+06	993493	1.08647e+06	1.16788e+06	1.40171e+06	1.2727e+06	1.48296e+06	745589	921351	860680	898173	54140.4	476441	1.03886e+06	1.2727e+06	1.28866e+06	190123	3	3	3	3	1	3	3	3	3	2	High	High	High	High	Peak Found	High	High	High	High	Peak Found	12	10.649	4.54
High	Q13907	Isopentenyl-diphosphate Delta-isomerase 1 OS=Homo sapiens OX=9606 GN=IDI1 PE=1 SV=2	IDI1		76	8	1.40688	0.013503	1.71157e+07	2.18753e+07	2.10937e+07	1.84841e+07	1.71053e+07	1.2527e+07	1.48687e+07	1.32629e+07	1.52093e+07	18073216	1.82738e+07	1.52806e+07	346639	6.97816e+06	9.28426e+06	1.48687e+07	1.15252e+07	7.77111e+06	8	9	8	8	5	9	8	8	7	9	High	High	High	High	Peak Found	High	High	High	High	High	58	59.613	67.81
High	P24468	COUP transcription factor 2 OS=Homo sapiens OX=9606 GN=NR2F2 PE=1 SV=1	NR2F2	ENSG00000185551.14	24	5	0.690167	0.0136294	858333	817645	897786	843713	1.63814e+06	1.14761e+06	1.31853e+06	1.06933e+06	762732	675532	777767	697491		668286	850537	1.31853e+06	929223	584138	4	3	4	4		5	5	5	4	4	Peak Found	High	High	High	Not Found	High	High	High	High	High	18	20.633	0
High	P61009	Signal peptidase complex subunit 3 OS=Homo sapiens OX=9606 GN=SPCS3 PE=1 SV=1	SPCS3	ENSG00000129128.12	30	3	0.861986	0.0136583	2.65011e+06	3.23184e+06	3.24111e+06	3.03695e+06	3.42447e+06	3.95179e+06	3.53715e+06	3.73534e+06	2.35494e+06	2.67012e+06	2.80783e+06	2.51063e+06	31709.8	1.39703e+06	2.92883e+06	3.53715e+06	3.24593e+06	2.22737e+06	3	3	3	3	1	3	3	3	3	3	High	High	High	High	Peak Found	High	High	High	High	High	18	10.147	1.61
High	P39023	60S ribosomal protein L3 OS=Homo sapiens OX=9606 GN=RPL3 PE=1 SV=2	RPL3	ENSG00000100316.15	591	15	0.847191	0.0136953	1.03967e+08	1.15025e+08	1.21683e+08	1.19077e+08	1.22225e+08	1.37792e+08	1.38535e+08	1.40849e+08	9.23871e+07	9.50325e+07	1.05416e+08	9.84403e+07	1.80439e+06	4.98622e+07	1.02123e+08	1.38535e+08	1.22394e+08	5.78819e+07	25	26	26	26	15	24	24	25	25	24	High	High	High	High	High	High	High	High	High	High	44	174.665	640.28
High	P0DMN0	Sulfotransferase 1A4 OS=Homo sapiens OX=9606 GN=SULT1A4 PE=1 SV=1	SULT1A4; LOC101929857; LOC101060714; SULT1A3; SLX1A-SULT1A3; LOC105369243	ENSG00000213648.10; ENSG00000261052.5	58	4	0.711959	0.0137775	1.79609e+06	2.51816e+06	2.86091e+06	2.15185e+06	3.23694e+06	3.11047e+06	4.12181e+06	3.32244e+06	1.59604e+06	2.08048e+06	2.47846e+06	1.77892e+06	40471.8	1.32052e+06	2.30529e+06	4.12181e+06	2.88713e+06	1.68334e+06	4	5	5	5	1	4	4	5	4	4	High	High	High	High	Peak Found	High	High	High	High	High	42	36.717	27.99
High	Q9H307	Pinin OS=Homo sapiens OX=9606 GN=PNN PE=1 SV=5			84	15	0.84398	0.013831	7.71238e+06	9.50266e+06	8.40227e+06	8.31635e+06	9.75999e+06	1.00493e+07	1.04116e+07	9.50186e+06	6.85338e+06	7.85103e+06	7.27903e+06	6.87506e+06	196877	3.98163e+06	7.4479e+06	1.04116e+07	8.25691e+06	3.61577e+06	14	15	14	15	9	14	14	15	14	13	High	High	High	High	Peak Found	High	High	High	High	High	27	57.125	40.01
High	O00299	Chloride intracellular channel protein 1 OS=Homo sapiens OX=9606 GN=CLIC1 PE=1 SV=4	CLIC1	ENSG00000213719.8; ENSG00000206394.8; ENSG00000230685.6; ENSG00000226248.6; ENSG00000223639.6; ENSG00000226651.6; ENSG00000226417.6	263	13	0.890689	0.0139138	4.35246e+07	4.83091e+07	4.97085e+07	4.41582e+07	5.23215e+07	5.39344e+07	5.1494e+07	5.08232e+07	3.86769e+07	3.99126e+07	4.30634e+07	3.65053e+07	860439	2.13448e+07	3.99729e+07	5.1494e+07	4.41643e+07	2.7032e+07	14	14	14	14	11	14	14	14	14	14	High	High	High	High	Peak Found	High	High	High	High	High	79	93.548	314.42
High	O60313	Dynamin-like 120 kDa protein, mitochondrial OS=Homo sapiens OX=9606 GN=OPA1 PE=1 SV=3	OPA1	ENSG00000198836.8	105	19	1.16489	0.0139375	1.30423e+07	1.49002e+07	1.55315e+07	1.44222e+07	1.21288e+07	1.29344e+07	1.24165e+07	1.27553e+07	1.15896e+07	1.23104e+07	1.34552e+07	1.19227e+07	223644	4.94798e+06	9.5862e+06	1.24165e+07	1.10841e+07	5.98223e+06	18	18	19	19	6	20	18	19	20	19	High	High	High	High	Peak Found	High	High	High	High	High	27	80.76	37.28
High	Q96CW5	Gamma-tubulin complex component 3 OS=Homo sapiens OX=9606 GN=TUBGCP3 PE=1 SV=2	TUBGCP3	ENSG00000126216.13	3	2	0.575403	0.0139539	197242	302824	234175	146019	347242	437313	374883		175273	250191	202870	120713		141659	324109	374883		244150	1	1	1	1		2	2	2		2	Peak Found	Peak Found	Peak Found	Peak Found	Not Found	High	Peak Found	High	Not Found	High	3	5.736	0
High	P50914	60S ribosomal protein L14 OS=Homo sapiens OX=9606 GN=RPL14 PE=1 SV=4	RPL14	ENSG00000188846.13	167	4	0.778587	0.0140102	3.61626e+07	3.9486e+07	4.3563e+07	4.22731e+07	4.40495e+07	5.50742e+07	4.99354e+07	5.54761e+07	3.21348e+07	3.26231e+07	3.77394e+07	3.49468e+07	1.33274e+06	1.79702e+07	4.08176e+07	4.99354e+07	4.82076e+07	3.08399e+07	5	5	5	5	4	5	5	5	5	5	High	High	High	High	High	High	High	High	High	High	21	26.112	243.14
High	Q92614	Unconventional myosin-XVIIIa OS=Homo sapiens OX=9606 GN=MYO18A PE=1 SV=3	MYO18A	ENSG00000196535.15	94	25	1.25107	0.0140471	1.04221e+07	1.17049e+07	1.19555e+07	9.55018e+06	8.06612e+06	9.28373e+06	9.10913e+06	8.57739e+06	9.26132e+06	9.67046e+06	1.03573e+07	7.89506e+06	85342.8	3.29061e+06	6.88053e+06	9.10913e+06	7.45357e+06	4.95396e+06	21	22	22	20	4	21	21	22	21	21	High	High	High	High	Peak Found	High	High	High	High	High	18	96.228	19.26
High	Q9H9T3	Elongator complex protein 3 OS=Homo sapiens OX=9606 GN=ELP3 PE=1 SV=2	ELP3	ENSG00000134014.16	13	4	0.541085	0.0140719	453782	708668	906630	607643	1.28191e+06	847333	1.18661e+06	1.24611e+06	403240	585496	785429	502334		522959	627991	1.18661e+06	1.08285e+06	485252	2	3	3	3		3	3	4	4	3	Peak Found	High	Peak Found	High	Not Found	High	High	High	High	High	11	15.945	3.91
High	O14975	Very long-chain acyl-CoA synthetase OS=Homo sapiens OX=9606 GN=SLC27A2 PE=1 SV=2	SLC27A2	ENSG00000140284.10	57	10	0.732482	0.0141514	4.47171e+06	4.27388e+06	4.49244e+06	4.53579e+06	7.35085e+06	5.1962e+06	5.49962e+06	6.73844e+06	3.97365e+06	3.53105e+06	3.89188e+06	3.7497e+06	26766	2.99881e+06	3.8511e+06	5.49962e+06	5.85555e+06	2.88567e+06	8	7	8	8	1	9	8	9	10	7	High	High	High	High	Peak Found	High	High	High	High	High	25	52.613	25.23
High	Q13572	Inositol-tetrakisphosphate 1-kinase OS=Homo sapiens OX=9606 GN=ITPK1 PE=1 SV=2	ITPK1	ENSG00000274958.4; ENSG00000100605.16	56	9	1.21149	0.0143791	1.02975e+07	1.20245e+07	1.2395e+07	1.03549e+07	9.77051e+06	9.04003e+06	9.43259e+06	8.77528e+06	9.15057e+06	9.93456e+06	1.0738e+07	8.56029e+06	31561	3.98592e+06	6.69991e+06	9.43259e+06	7.62553e+06	4.50494e+06	11	11	11	11	1	11	10	11	11	11	High	High	High	High	Peak Found	High	High	High	High	High	37	48.464	28.41
High	Q9H9J2	39S ribosomal protein L44, mitochondrial OS=Homo sapiens OX=9606 GN=MRPL44 PE=1 SV=1	MRPL44	ENSG00000135900.3	40	7	1.15469	0.0146317	5.25756e+06	4.46488e+06	4.81495e+06	4.73603e+06	4.26325e+06	3.66787e+06	4.00822e+06	4.32236e+06	4.67198e+06	3.68885e+06	4.17127e+06	3.91524e+06	319969	1.73921e+06	2.7184e+06	4.00822e+06	3.75604e+06	2.57115e+06	6	6	6	6	4	6	6	6	6	6	High	High	High	High	Peak Found	High	High	High	High	High	28	31.043	3.96
High	P63173	60S ribosomal protein L38 OS=Homo sapiens OX=9606 GN=RPL38 PE=1 SV=2	RPL38	ENSG00000172809.12	72	2	0.796135	0.0147281	1.10518e+07	1.19954e+07	1.41504e+07	1.1913e+07	1.63373e+07	1.44662e+07	14082214	1.55645e+07	9.82084e+06	9910510	1.22587e+07	9848424	486351	6.66488e+06	1.07215e+07	14082214	1.35252e+07	6.74641e+06	2	2	2	2	2	2	2	2	2	2	High	High	High	High	Peak Found	High	High	High	High	High	29	8.283	55.61
High	Q86Y56	Dynein assembly factor 5, axonemal OS=Homo sapiens OX=9606 GN=DNAAF5 PE=1 SV=4	HEATR2; DNAAF5	ENSG00000164818.15	16	4	0.811176	0.0147281	1.09649e+06	1.27706e+06	962735	1.0869e+06	1.36655e+06	1.34355e+06	1.34808e+06	1.27902e+06	974359	1.0551e+06	834034	898531		557491	995754	1.34808e+06	1.11144e+06	830223	4	4	3	4		4	4	4	4	4	High	High	High	High	Not Found	Peak Found	High	High	High	High	7	12.67	2.06
High	Q9UQE7	Structural maintenance of chromosomes protein 3 OS=Homo sapiens OX=9606 GN=SMC3 PE=1 SV=2	SMC3	ENSG00000108055.9	74	17	1.14296	0.0147502	1.89595e+07	1.81645e+07	1.69576e+07	1.80788e+07	1.46025e+07	1.54048e+07	1.63051e+07	1.69437e+07	1.68478e+07	1.50073e+07	1.46906e+07	1.49456e+07	479986	5.95714e+06	1.14171e+07	1.63051e+07	1.47237e+07	9.5644e+06	16	17	17	16	3	17	17	17	16	16	High	High	High	High	Peak Found	High	High	High	High	High	18	62.888	38.71
High	Q9BSH4	Translational activator of cytochrome c oxidase 1 OS=Homo sapiens OX=9606 GN=TACO1 PE=1 SV=1	TACO1	ENSG00000136463.7	13	4	0.78889	0.014913	1.26436e+06	1.30257e+06	1.54026e+06	1.32172e+06	1.58443e+06	1.69345e+06	1.98004e+06	1.63312e+06	1.12353e+06	1.07618e+06	1.33435e+06	1.09266e+06		646373	1.25508e+06	1.98004e+06	1.41915e+06	666767	4	4	4	4		4	4	4	4	4	High	High	High	High	Not Found	High	High	High	High	High	19	11.883	3.62
High	P50552	Vasodilator-stimulated phosphoprotein OS=Homo sapiens OX=9606 GN=VASP PE=1 SV=3	VASP	ENSG00000125753.13	94	14	1.27057	0.0150167	1.07104e+07	1.07588e+07	1.16932e+07	1.12953e+07	1.04097e+07	8.19981e+06	9.15776e+06	7.4008e+06	9.51745e+06	8.88885e+06	1.01301e+07	9.3377e+06	37491	4.24668e+06	6.07719e+06	9.15776e+06	6.43114e+06	2.25262e+06	13	12	13	13	3	11	12	13	11	9	High	High	High	High	Peak Found	High	High	High	High	High	41	64.85	93.8
High	Q9BYT8	Neurolysin, mitochondrial OS=Homo sapiens OX=9606 GN=NLN PE=1 SV=1	NLN	ENSG00000123213.22	47	7	0.792271	0.0150541	3.55437e+06	4.97458e+06	4.75369e+06	3.92032e+06	6.07126e+06	5.29561e+06	5.37188e+06	5.57642e+06	3.15848e+06	4.10996e+06	4.11821e+06	3.2409e+06	105763	2.4768e+06	3.92478e+06	5.37188e+06	4.84578e+06	3.00757e+06	5	6	6	5	3	7	6	6	7	7	High	High	High	High	Peak Found	High	High	High	High	High	13	29.479	29.54
High	P05091	Aldehyde dehydrogenase, mitochondrial OS=Homo sapiens OX=9606 GN=ALDH2 PE=1 SV=2	ALDH2	ENSG00000111275.12	277	18	1.10082	0.0150609	3.51988e+07	3.78118e+07	3.64166e+07	3.76853e+07	3.30346e+07	3.2415e+07	3.42804e+07	3.53324e+07	3.12783e+07	3.12398e+07	3.15484e+07	3.11541e+07	824550	1.34766e+07	2.4024e+07	3.42804e+07	3.07031e+07	1.68314e+07	20	19	19	20	12	20	20	20	20	20	High	High	High	High	Peak Found	High	High	High	High	High	52	125.959	238.21
High	P49643	DNA primase large subunit OS=Homo sapiens OX=9606 GN=PRIM2 PE=1 SV=2	PRIM2	ENSG00000146143.17	25	6	0.755472	0.0153239	1.46945e+06	1.55804e+06	1.65789e+06	1.22661e+06	2.49129e+06	1.88421e+06	1.81179e+06	2.1232e+06	1.30578e+06	1.28724e+06	1.43626e+06	1.01403e+06	37005.9	1.01633e+06	1.39646e+06	1.81179e+06	1.84502e+06	1.16138e+06	6	6	6	5	1	6	6	6	6	6	High	High	High	High	Peak Found	High	Peak Found	High	High	High	14	22.346	7.57
High	Q9Y490	Talin-1 OS=Homo sapiens OX=9606 GN=TLN1 PE=1 SV=3	TLN1	ENSG00000137076.20	550	74	0.892888	0.015335	6.85494e+07	8.11865e+07	7.39171e+07	7.61348e+07	8.5285e+07	8.49452e+07	8.26704e+07	8.31072e+07	6.09143e+07	6.70757e+07	6.40357e+07	6.29401e+07	1.2055e+06	3.47924e+07	6.29562e+07	8.26704e+07	7.22183e+07	4.02736e+07	76	77	75	77	28	76	75	73	75	73	High	High	High	High	Peak Found	High	High	High	High	High	45	438.559	478.34
High	P04406	Glyceraldehyde-3-phosphate dehydrogenase OS=Homo sapiens OX=9606 GN=GAPDH PE=1 SV=3	GAPDH	ENSG00000111640.14	2708	18	1.12131	0.0153598	1.47248e+09	1.60092e+09	1.63048e+09	1.49397e+09	1.2979e+09	1.3525e+09	1.45172e+09	1.40756e+09	1.30848e+09	1.32267e+09	1.41252e+09	1.23505e+09	5.53188e+07	5.29483e+08	1.00239e+09	1.45172e+09	1.22314e+09	6.96572e+08	38	42	42	41	34	38	39	40	41	39	High	High	High	High	High	High	High	High	High	High	79	408.604	3753.86
High	Q9UKX7	Nuclear pore complex protein Nup50 OS=Homo sapiens OX=9606 GN=NUP50 PE=1 SV=2	NUP50	ENSG00000093000.18	54	9	0.917936	0.0153929	4.38881e+06	4.97851e+06	4.99737e+06	4.63125e+06	5.26294e+06	5.45173e+06	5.19595e+06	5.20594e+06	3.89999e+06	4.11321e+06	4.32931e+06	3.82862e+06	18716.4	2.14704e+06	4.04049e+06	5.19595e+06	4.52385e+06	1.97833e+06	9	9	9	9	1	9	9	9	9	9	High	High	High	High	Peak Found	High	High	High	High	High	27	36.538	16.76
High	P31350	Ribonucleoside-diphosphate reductase subunit M2 OS=Homo sapiens OX=9606 GN=RRM2 PE=1 SV=1	RRM2	ENSG00000171848.13	47	7	0.810584	0.0154709	3.50922e+06	3.7873e+06	4.18372e+06	3.6405e+06	4.06806e+06	4.68731e+06	4.47621e+06	4.79665e+06	3.11836e+06	3.12904e+06	3.62443e+06	3.00957e+06		1.65958e+06	3.47395e+06	4.47621e+06	4.16819e+06	3.09323e+06	7	7	7	7		7	7	7	7	7	High	High	High	High	Not Found	High	High	High	High	High	24	27.715	28.41
High	Q9Y262	Eukaryotic translation initiation factor 3 subunit L OS=Homo sapiens OX=9606 GN=EIF3L PE=1 SV=1	EIF3L	ENSG00000100129.17	225	23	0.836006	0.0156003	2.80195e+07	3.5716e+07	3.45244e+07	3.68256e+07	3.84147e+07	4.12154e+07	4.52515e+07	4.28036e+07	2.48987e+07	2.95083e+07	2.99091e+07	3.04434e+07	529423	1.56714e+07	3.05463e+07	4.52515e+07	3.71954e+07	2.56635e+07	21	21	21	23	11	24	21	24	22	22	High	High	High	High	Peak Found	High	High	High	High	High	51	113.887	183.68
High	Q9HCY8	Protein S100-A14 OS=Homo sapiens OX=9606 GN=S100A14 PE=1 SV=1	S100A14	ENSG00000189334.8	17	4	0.6984	0.0157056	2.11586e+06	1.60637e+06	1.29051e+06	1.714e+06	3.07723e+06	2.27176e+06	2.4389e+06	2.31535e+06	1.88019e+06	1.32717e+06	1.11799e+06	1.41695e+06	135511	1.25537e+06	1.68368e+06	2.4389e+06	2.01198e+06	3.92886e+06	3	3	3	3	3	3	3	3	3	3	High	High	High	High	Peak Found	High	High	High	High	High	46	17.33	24.61
High	Q5TC12	ATP synthase mitochondrial F1 complex assembly factor 1 OS=Homo sapiens OX=9606 GN=ATPAF1 PE=1 SV=1	ATPAF1	ENSG00000123472.12	10	4	1.23426	0.0157168	1.4373e+06	1.5685e+06	1.70977e+06	1.35e+06	1.26447e+06	1.17084e+06	1.31162e+06	1.1697e+06	1.27722e+06	1.29589e+06	1.48121e+06	1.11603e+06	43818.8	515846	867754	1.31162e+06	1.01644e+06	799486	4	4	4	4	2	4	4	4	4	4	High	High	High	High	Peak Found	Peak Found	Peak Found	High	High	Peak Found	16	11.624	0
High	O00429	Dynamin-1-like protein OS=Homo sapiens OX=9606 GN=DNM1L PE=1 SV=2	DNM1L	ENSG00000087470.17	177	26	1.23391	0.0157629	6.17215e+07	7.49195e+07	7.42116e+07	6.40718e+07	5.67349e+07	5.53341e+07	6.00344e+07	5.0942e+07	5.48469e+07	6.18979e+07	6.42908e+07	5.29677e+07	1.01338e+06	2.31452e+07	4.10102e+07	6.00344e+07	4.42675e+07	2.69835e+07	27	27	26	25	7	25	26	27	26	26	High	High	High	High	Peak Found	High	High	High	High	High	48	127.686	126.13
High	Q9NRX5	Serine incorporator 1 OS=Homo sapiens OX=9606 GN=SERINC1 PE=1 SV=1	SERINC1	ENSG00000111897.6	19	3	1.31747	0.0157894	3.18832e+06	4.10123e+06	4.08927e+06	3.21264e+06	2.74052e+06	2.80185e+06	2842026	2.16311e+06	2.8332e+06	3.38841e+06	3.54261e+06	2.65586e+06	47249.4	1.11801e+06	2.07656e+06	2842026	1.87969e+06	1.36414e+06	3	3	3	3	2	3	3	3	3	3	High	High	High	High	Peak Found	High	High	High	High	High	9	16.916	20.19
High	P56134	ATP synthase subunit f, mitochondrial OS=Homo sapiens OX=9606 GN=ATP5MF PE=1 SV=3	ATP5J2	ENSG00000241468.7	97	3	1.26795	0.0157918	7.71337e+06	9.06005e+06	8.34496e+06	8.49774e+06	7.72447e+06	5.93169e+06	7.11718e+06	6.16628e+06	6.85426e+06	7.48534e+06	7.22938e+06	7.02502e+06	173889	3.15123e+06	4.3962e+06	7.11718e+06	5.35836e+06	3.48091e+06	4	4	4	4	3	4	4	4	4	4	High	High	High	High	Peak Found	High	High	High	High	High	40	21.663	112.34
High	P11940	Polyadenylate-binding protein 1 OS=Homo sapiens OX=9606 GN=PABPC1 PE=1 SV=2	PABPC1	ENSG00000070756.15	465	14	0.843582	0.015934	6.49794e+07	7.36067e+07	7.5972e+07	7.36606e+07	7.60257e+07	8.86144e+07	8.62217e+07	8.83522e+07	5.7742e+07	6.08133e+07	6.58159e+07	6.08947e+07	1.72988e+06	3.1015e+07	6.56755e+07	8.62217e+07	7.67761e+07	3.42469e+07	13	13	13	13	9	13	13	13	13	13	High	High	High	High	Peak Found	High	High	High	High	High	36	152.218	620.36
High	O75306	NADH dehydrogenase [ubiquinone] iron-sulfur protein 2, mitochondrial OS=Homo sapiens OX=9606 GN=NDUFS2 PE=1 SV=2	NDUFS2	ENSG00000158864.12	98	10	1.19088	0.0160357	1.32284e+07	1.58716e+07	1.47691e+07	1.41286e+07	1.27666e+07	9.98458e+06	1.23059e+07	1.196e+07	1.1755e+07	13112998	1.27947e+07	1.168e+07	143338	5.2082e+06	7.39995e+06	1.23059e+07	1.0393e+07	6.34131e+06	10	10	10	10	5	10	10	10	10	10	High	High	High	High	Peak Found	High	High	High	High	High	32	56.036	90.11
High	Q92979	Ribosomal RNA small subunit methyltransferase NEP1 OS=Homo sapiens OX=9606 GN=EMG1 PE=1 SV=4	EMG1	ENSG00000126749.14	44	6	0.76456	0.0160657	3.15682e+06	2.24571e+06	2.41105e+06	3.26801e+06	3.60957e+06	3.79754e+06	3.51773e+06	3.67288e+06	2.80521e+06	1.85539e+06	2.08874e+06	2.70164e+06		1.47254e+06	2.8145e+06	3.51773e+06	3.19165e+06	2.44711e+06	5	4	4	5		5	5	5	5	5	High	High	High	High	Not Found	High	High	High	High	High	32	23.732	9.05
High	Q8NFQ8	Torsin-1A-interacting protein 2 OS=Homo sapiens OX=9606 GN=TOR1AIP2 PE=1 SV=1	TOR1AIP2	ENSG00000169905.12	15	4	0.867126	0.0161415	912024	974613	999159	862734	1.10554e+06	1.13082e+06	1.07019e+06	999252	810443	805218	865589	713215		451012	838094	1.07019e+06	868328	494764	4	4	4	4		4	4	4	4	4	High	High	High	High	Not Found	Peak Found	High	High	High	High	14	13.201	0
High	A0A0B4J2D5	Glutamine amidotransferase-like class 1 domain-containing protein 3B, mitochondrial OS=Homo sapiens OX=9606 GN=GATD3B PE=1 SV=1	C21orf33; LOC102724023	ENSG00000280071.3	43	4	1.30438	0.0161517	6.50729e+06	6.61191e+06	6.53171e+06	6.50321e+06	4.56155e+06	6.2546e+06	5.41123e+06	4.58508e+06	5.78251e+06	5.46271e+06	5.65853e+06	5.37615e+06	100011	1.8609e+06	4.63552e+06	5.41123e+06	3.98433e+06	3.82845e+06	4	4	4	4	3	4	4	4	4	4	High	High	High	High	Peak Found	High	High	High	High	High	22	26.793	20.95
High	Q9HCD5	Nuclear receptor coactivator 5 OS=Homo sapiens OX=9606 GN=NCOA5 PE=1 SV=2	NCOA5	ENSG00000124160.11	21	6	1.15978	0.0161522	2.74314e+06	3.10513e+06	3.04752e+06	3.04641e+06	2.63515e+06	2.44645e+06	2.7977e+06	2.61924e+06	2.43761e+06	2.56543e+06	2.64012e+06	2.51844e+06		1.07502e+06	1.81316e+06	2.7977e+06	2.27606e+06	783184	6	6	6	6		6	5	6	5	5	High	High	High	High	Not Found	High	High	High	High	High	14	18.171	7.71
High	P61020	Ras-related protein Rab-5B OS=Homo sapiens OX=9606 GN=RAB5B PE=1 SV=1	RAB5B	ENSG00000111540.15	98	4	1.41722	0.0162193	1.30485e+06	1.36221e+06	1.23462e+06	1.37293e+06	1.0191e+06	1.11265e+06	862802	527011	1.15952e+06	1.12545e+06	1.06957e+06	1134987		415746	824627	862802	457961	562181	3	3	3	3		3	3	2	2	3	High	High	High	High	Not Found	High	High	High	High	High	41	27.914	126.7
High	P63167	Dynein light chain 1, cytoplasmic OS=Homo sapiens OX=9606 GN=DYNLL1 PE=1 SV=1	DYNLL1	ENSG00000088986.10	25	3	0.825356	0.0162805	4.46048e+06	5.22585e+06	5.06888e+06	4.72098e+06	5.22166e+06	5.9614e+06	6.46333e+06	5.89997e+06	3.96367e+06	4.31755e+06	4.39126e+06	3.9028e+06	68470.9	2.1302e+06	4.41822e+06	6.46333e+06	5.12695e+06	3.65023e+06	4	4	4	4	2	4	4	4	4	4	High	High	High	High	Peak Found	High	High	High	High	High	49	16.611	12.9
High	P42126	Enoyl-CoA delta isomerase 1, mitochondrial OS=Homo sapiens OX=9606 GN=ECI1 PE=1 SV=1	ECI1	ENSG00000167969.12	84	7	1.17923	0.0163291	1.0698e+07	1.21537e+07	1.18591e+07	1.23843e+07	9.28857e+06	9.89216e+06	1.08097e+07	1.0471e+07	9.50647e+06	1.00413e+07	1.02738e+07	1.0238e+07	46164.4	3.78931e+06	7.33146e+06	1.08097e+07	9.09905e+06	1636962	6	6	6	7	2	6	6	6	6	5	High	High	High	High	Peak Found	High	High	High	High	High	33	31.669	70.32
High	P28331	NADH-ubiquinone oxidoreductase 75 kDa subunit, mitochondrial OS=Homo sapiens OX=9606 GN=NDUFS1 PE=1 SV=3	NDUFS1	ENSG00000283447.1; ENSG00000023228.13	174	21	1.22768	0.0163972	1.60638e+07	1.6196e+07	1.54119e+07	1.45064e+07	1.49077e+07	1.20348e+07	1.28275e+07	1.28107e+07	1.42746e+07	1.3381e+07	1.33516e+07	1.19923e+07	343752	6.08165e+06	8.91948e+06	1.28275e+07	1.11322e+07	5.76738e+06	21	20	20	19	8	20	20	18	18	21	High	High	High	High	Peak Found	High	High	High	High	High	45	113.39	141.74
High	Q969U7	Proteasome assembly chaperone 2 OS=Homo sapiens OX=9606 GN=PSMG2 PE=1 SV=1	PSMG2	ENSG00000128789.20	14	3	0.754649	0.0163987	1.34841e+06	1.41885e+06	1.63319e+06	1.50652e+06	2.48141e+06	1.7626e+06	1.93319e+06	1.94328e+06	1.19822e+06	1.17225e+06	1.41487e+06	1.24543e+06	21198.2	1.0123e+06	1.30633e+06	1.93319e+06	1.68867e+06	1.25452e+06	3	3	3	3	1	3	3	3	3	3	High	High	High	High	Peak Found	High	Peak Found	High	High	High	12	9.53	0
High	P40938	Replication factor C subunit 3 OS=Homo sapiens OX=9606 GN=RFC3 PE=1 SV=2	RFC3	ENSG00000133119.12	51	8	0.880159	0.0164678	2.45854e+06	2.87444e+06	2.94206e+06	2.72176e+06	3.14692e+06	3.21124e+06	2.99404e+06	3.21512e+06	2.1847e+06	2.37484e+06	2.54876e+06	2.25005e+06	16072.7	1.2838e+06	2.37997e+06	2.99404e+06	2.79387e+06	2.13618e+06	7	7	7	7	1	7	7	7	7	7	High	High	High	High	Peak Found	High	High	High	High	High	36	30.439	7.54
High	Q9BZE4	Nucleolar GTP-binding protein 1 OS=Homo sapiens OX=9606 GN=GTPBP4 PE=1 SV=3	GTPBP4	ENSG00000107937.18	41	9	0.88015	0.0165601	4.38008e+06	5.48809e+06	5.51185e+06	5.19796e+06	6.54139e+06	6.13342e+06	5.86895e+06	6.00774e+06	3.89223e+06	4.53422e+06	4.77501e+06	4.29712e+06	54745.5	2.66859e+06	4.54572e+06	5.86895e+06	5.2206e+06	2.83946e+06	9	9	9	9	2	9	9	9	9	8	High	High	High	High	Peak Found	High	High	High	High	High	17	32.521	20.74
High	Q12907	Vesicular integral-membrane protein VIP36 OS=Homo sapiens OX=9606 GN=LMAN2 PE=1 SV=1	LMAN2	ENSG00000169223.14	66	11	1.15821	0.0165712	1.8502e+07	2.0856e+07	2.07172e+07	1.88325e+07	1.47145e+07	1.66217e+07	1.77966e+07	1.75256e+07	1.64412e+07	1.72311e+07	17947697	1.55686e+07	169850	6002850	1.2319e+07	1.77966e+07	1.52294e+07	9337067	11	11	11	10	3	11	10	11	11	10	High	High	High	High	Peak Found	High	High	High	High	High	42	37.442	38.38
High	O00764	Pyridoxal kinase OS=Homo sapiens OX=9606 GN=PDXK PE=1 SV=1	PDXK	ENSG00000160209.18	103	8	0.727368	0.016723	7.73686e+06	8.65896e+06	8.36806e+06	7.76821e+06	1.43881e+07	9.64518e+06	1.14765e+07	1.0708e+07	6.87513e+06	7.15397e+06	7.2494e+06	6.42192e+06	113736	5.86968e+06	7.14841e+06	1.14765e+07	9.305e+06	4.30782e+06	8	8	8	8	3	8	8	8	8	8	High	High	High	High	Peak Found	High	High	High	High	High	38	62.143	122.11
High	Q9NR09	Baculoviral IAP repeat-containing protein 6 OS=Homo sapiens OX=9606 GN=BIRC6 PE=1 SV=2	BIRC6		5	3	0.71451	0.0167676	327531	466285	392014	377234	509693	566915	669865	481050	291051	385241	339609	311856		207931	420163	669865	418022	353472	3	3	3	3		2	3	3	2	3	Peak Found	Peak Found	Peak Found	Peak Found	Not Found	Peak Found	Peak Found	High	High	High	1	8.545	0
High	O43660	Pleiotropic regulator 1 OS=Homo sapiens OX=9606 GN=PLRG1 PE=1 SV=1	PLRG1	ENSG00000171566.11	11	4	0.716263	0.0169011	729631	950254	629699	992399	1.25952e+06	1.05424e+06	1.08583e+06	1.30401e+06	648365	785092	545519	820409		513826	781341	1.08583e+06	1.13316e+06	731322	2	3	2	3		3	3	3	3	3	High	High	Peak Found	High	Not Found	High	High	High	High	High	17	14.116	7.49
High	Q8WW59	SPRY domain-containing protein 4 OS=Homo sapiens OX=9606 GN=SPRYD4 PE=1 SV=2	SPRYD4		13	2	1.25688	0.0169849	649157	686525	697900	655907	501693	552022	651553	516041	576853	567202	604603	542233		204668	409124	651553	448428	374271	2	2	2	2		2	2	2	2	2	High	High	High	High	Not Found	Peak Found	High	Peak Found	High	High	14	5.754	0
High	Q9UKU7	Isobutyryl-CoA dehydrogenase, mitochondrial OS=Homo sapiens OX=9606 GN=ACAD8 PE=1 SV=1	ACAD8	ENSG00000151498.11	15	3	1.25502	0.0170077	1.04659e+06	1.26135e+06	1.24388e+06	1.21021e+06	935529	861296	1019889	1.06763e+06	930019	1.04212e+06	1.07759e+06	1.00047e+06	24468.2	381653	638340	1019889	927749	597061	3	3	3	3	1	3	3	3	3	3	High	High	High	High	Peak Found	Peak Found	High	High	High	High	8	10.281	17.76
High	P62244	40S ribosomal protein S15a OS=Homo sapiens OX=9606 GN=RPS15A PE=1 SV=2	RPS15A	ENSG00000134419.15	375	6	0.824354	0.0170819	5.68413e+07	5.42114e+07	5.67971e+07	6.20105e+07	6.01271e+07	7.09048e+07	6.73185e+07	7.0533e+07	5.05103e+07	4.47891e+07	4.92043e+07	5.12636e+07	967502	2.45291e+07	5.25502e+07	6.73185e+07	6.12916e+07	4.2658e+07	9	8	8	9	5	9	8	9	9	9	High	High	High	High	High	High	High	High	High	High	52	51.535	553.26
High	Q15293	Reticulocalbin-1 OS=Homo sapiens OX=9606 GN=RCN1 PE=1 SV=1	RCN1	ENSG00000049449.8	6	3	0.52843	0.0171686	555827	1.405e+06	1.22094e+06	615440	1.47507e+06	1.86476e+06	1.81814e+06	1.65702e+06	493919	1.1608e+06	1.05772e+06	508779		601761	1.38204e+06	1.81814e+06	1.43992e+06		2	3	3	2		3	3	3	3		High	High	Peak Found	Peak Found	Not Found	High	Peak Found	High	High	Not Found	12	9.984	0
High	Q9H0B6	Kinesin light chain 2 OS=Homo sapiens OX=9606 GN=KLC2 PE=1 SV=1	KLC2	ENSG00000174996.11	60	8	1.25259	0.0171819	3.69021e+06	4.54605e+06	3.99271e+06	3.43006e+06	3.19696e+06	3.27535e+06	2.93668e+06	2.77809e+06	3.27919e+06	3.75591e+06	3.45895e+06	2.83561e+06	93950.2	1.30421e+06	2.42749e+06	2.93668e+06	2.4141e+06	1.14453e+06	7	7	7	6	4	7	6	6	6	7	High	High	High	High	Peak Found	High	High	High	High	High	27	47.726	22.28
High	Q7LBC6	Lysine-specific demethylase 3B OS=Homo sapiens OX=9606 GN=KDM3B PE=1 SV=2	KDM3B	ENSG00000120733.13	10	3	3.59264	0.0172506	690628	766814	241689	783030	198974	210609	206701	197888	613706	633536	209380	647325		81172.2	156090	206701	171960	74139	2	2	1	2		1	1	1	1	1	High	High	High	High	Not Found	Peak Found	Peak Found	High	Peak Found	Peak Found	2	9.47	3.89
High	P62277	40S ribosomal protein S13 OS=Homo sapiens OX=9606 GN=RPS13 PE=1 SV=2	RPS13	ENSG00000110700.6	229	4	0.860141	0.0172598	5.30731e+07	5.93313e+07	6.25119e+07	5.93145e+07	7.43358e+07	6.68109e+07	63093703	7.11268e+07	4.71618e+07	4.9019e+07	5.41551e+07	4.90348e+07	1.96983e+06	3.03256e+07	4.95161e+07	63093703	6.18076e+07	4.30897e+07	6	6	6	6	4	6	5	6	6	6	High	High	High	High	High	High	High	High	High	High	30	35.954	231.26
High	Q92616	eIF-2-alpha kinase activator GCN1 OS=Homo sapiens OX=9606 GN=GCN1 PE=1 SV=6	GCN1L1; GCN1		340	54	0.805351	0.0172726	2.26088e+07	2.52183e+07	2.48045e+07	2.2506e+07	3.69762e+07	2.77539e+07	2.93873e+07	2.94856e+07	2.00906e+07	2.08352e+07	2.14886e+07	1.86055e+07	322202	1.50846e+07	2.05695e+07	2.93873e+07	2.56223e+07	1.81352e+07	53	51	51	48	11	53	52	54	54	55	High	High	High	High	Peak Found	High	High	High	High	High	28	224.023	96.4
High	Q5VTR2	E3 ubiquitin-protein ligase BRE1A OS=Homo sapiens OX=9606 GN=RNF20 PE=1 SV=2	RNF20	ENSG00000155827.11	24	3	0.804083	0.0172884	777516	911712	1.01185e+06	1.00824e+06	1.03736e+06	1.24149e+06	1.14626e+06	1.24359e+06	690916	753249	876582	833504	16167	423196	920115	1.14626e+06	1.08065e+06	482676	3	2	3	3	1	3	3	3	3	3	Peak Found	Peak Found	High	High	Peak Found	High	High	Peak Found	High	High	6	15.535	11.9
High	Q8N2F6	Armadillo repeat-containing protein 10 OS=Homo sapiens OX=9606 GN=ARMC10 PE=1 SV=1	ARMC10	ENSG00000170632.13	9	3	1.22078	0.0173586	632513	758063	799239	725844	601455	635065	563744	614081	562064	626306	692395	600049		245366	470671	563744	533623	337209	2	2	2	2		2	2	2	2	2	High	High	High	Peak Found	Not Found	Peak Found	Peak Found	High	High	High	11	9.132	1.84
High	P29692	Elongation factor 1-delta OS=Homo sapiens OX=9606 GN=EEF1D PE=1 SV=5	EEF1D	ENSG00000104529.17; ENSG00000273594.4	340	12	0.832558	0.0175165	6.31734e+07	6.81413e+07	7.38578e+07	6.7724e+07	7.60154e+07	8.42447e+07	9.50149e+07	7.89455e+07	5.61372e+07	5.62978e+07	6.39843e+07	5.59869e+07	579403	3.10108e+07	6.2437e+07	9.50149e+07	6.86019e+07	1.88849e+07	15	15	16	14	8	15	16	16	15	14	High	High	High	High	Peak Found	High	High	High	High	High	66	110.463	476.86
High	P84103	Serine/arginine-rich splicing factor 3 OS=Homo sapiens OX=9606 GN=SRSF3 PE=1 SV=1	SRSF3	ENSG00000112081.16	130	4	0.811868	0.0175603	1.96419e+07	1.77446e+07	2.22902e+07	2.36099e+07	2.6651e+07	2.49978e+07	2.76339e+07	2.40454e+07	1.74542e+07	1.46605e+07	1.93104e+07	1.95181e+07	477299	1.08724e+07	1.85269e+07	2.76339e+07	2.0895e+07	4.00209e+06	5	5	5	5	4	5	5	5	5	5	High	High	High	High	High	High	High	High	High	High	30	32.168	94.59
High	O95167	NADH dehydrogenase [ubiquinone] 1 alpha subcomplex subunit 3 OS=Homo sapiens OX=9606 GN=NDUFA3 PE=1 SV=1	NDUFA3	ENSG00000273642.1; ENSG00000276766.1; ENSG00000275605.1; ENSG00000276220.1; ENSG00000276061.4; ENSG00000170906.15; ENSG00000278365.1; ENSG00000275724.1; ENSG00000277722.1; ENSG00000274359.1	7	2	0.748269	0.0176208	779644	637545	708680	711176	785433	1.05261e+06	1.02258e+06	874946	692808	526735	613942	587923	30722.6	320421	780129	1.02258e+06	760309	629598	1	1	1	1	1	2	2	2	2	2	Peak Found	Peak Found	High	High	Peak Found	Peak Found	High	High	Peak Found	High	42	5.062	1.8
High	Q5T0N5	Formin-binding protein 1-like OS=Homo sapiens OX=9606 GN=FNBP1L PE=1 SV=3	FNBP1L	ENSG00000137942.16	21	5	1.27378	0.0177381	2.12338e+06	2.39528e+06	2.33966e+06	2.0659e+06	2.10878e+06	1.7233e+06	1.78048e+06	1.71884e+06	1.88687e+06	1.97896e+06	2.02689e+06	1.70786e+06		860287	1.2772e+06	1.78048e+06	1.49363e+06	873673	5	5	5	5		5	5	5	5	5	High	High	High	High	Not Found	High	High	High	High	Peak Found	14	18.139	0
High	O75340	Programmed cell death protein 6 OS=Homo sapiens OX=9606 GN=PDCD6 PE=1 SV=1	PDCD6	ENSG00000249915.7	77	7	1.40793	0.0179728	9.20452e+06	9.45338e+06	9.49961e+06	1.03413e+07	9.31162e+06	6.84936e+06	6.61225e+06	6.41156e+06	8.17932e+06	7.81031e+06	8.22967e+06	8.54911e+06	192425	3.79871e+06	5.07633e+06	6.61225e+06	5.57151e+06	4.36107e+06	7	7	7	7	4	8	7	7	7	7	High	High	High	High	Peak Found	High	High	High	High	High	50	48.986	67.77
High	P27797	Calreticulin OS=Homo sapiens OX=9606 GN=CALR PE=1 SV=1	CALR	ENSG00000179218.13	440	21	0.865084	0.0179737	1.19845e+08	1.48322e+08	1.28638e+08	1.35629e+08	1.51205e+08	1.52302e+08	1.5318e+08	1.53668e+08	1.06496e+08	1.22543e+08	1.11441e+08	1.12123e+08	806321	6.16846e+07	1.12877e+08	1.5318e+08	1.33534e+08	2.07992e+07	23	23	23	24	12	22	24	22	24	22	High	High	High	High	High	High	High	High	High	High	75	186.356	453.13
High	P62805	Histone H4 OS=Homo sapiens OX=9606 GN=H4C1 PE=1 SV=2	HIST1H4A; HIST1H4F; HIST1H4D; HIST1H4J; HIST2H4A; HIST2H4B; HIST1H4H; HIST1H4C; HIST4H4; HIST1H4E; HIST1H4I; HIST1H4B; HIST1H4K; HIST1H4L	ENSG00000197061.4; ENSG00000275126.1; ENSG00000273542.1; ENSG00000197238.4; ENSG00000197837.3; ENSG00000276966.2; ENSG00000158406.4; ENSG00000270882.2; ENSG00000274618.1; ENSG00000278637.1; ENSG00000277157.1; ENSG00000278705.1; ENSG00000270276.2; ENSG00000276180.1	751	6	0.824837	0.018113	1.65295e+08	1.80044e+08	2.10624e+08	2.15069e+08	2.34518e+08	2.49946e+08	2.20766e+08	2.39113e+08	1.46885e+08	1.48751e+08	1.82467e+08	1.77796e+08	7.96229e+06	9.56727e+07	1.85244e+08	2.20766e+08	2.07784e+08	1.05218e+08	7	7	7	6	5	7	7	7	6	7	High	High	High	High	High	High	High	High	High	High	50	40.97	933.88
High	P06744	Glucose-6-phosphate isomerase OS=Homo sapiens OX=9606 GN=GPI PE=1 SV=4	GPI	ENSG00000105220.14	1124	21	1.14186	0.018128	2.81362e+08	3.2285e+08	3.08992e+08	3.13063e+08	2.61492e+08	2.72564e+08	2.72209e+08	2.8704e+08	2.50024e+08	2.66737e+08	2.67685e+08	2.58807e+08	7.13409e+06	1.06677e+08	2.02007e+08	2.72209e+08	2.49432e+08	1.59338e+08	38	38	37	39	23	37	36	36	36	39	High	High	High	High	High	High	High	High	High	High	51	273.709	1195.59
High	P67870	Casein kinase II subunit beta OS=Homo sapiens OX=9606 GN=CSNK2B PE=1 SV=1	CSNK2B	ENSG00000224774.7; ENSG00000230700.9; ENSG00000206406.9; ENSG00000204435.13; ENSG00000232960.10; ENSG00000224398.7; ENSG00000228875.8	40	3	0.849711	0.0182442	3.77816e+06	4.20749e+06	4.69561e+06	4.04332e+06	4.92347e+06	4.78668e+06	5.38459e+06	4.74573e+06	3.35735e+06	3.4762e+06	4.06789e+06	3.34258e+06	21882.3	2.00855e+06	3.54759e+06	5.38459e+06	4.12393e+06	1.4773e+06	3	3	3	3	1	3	3	3	3	3	High	High	High	High	Peak Found	High	High	High	High	High	19	26.151	61.87
High	Q9BVT8	Transmembrane and ubiquitin-like domain-containing protein 1 OS=Homo sapiens OX=9606 GN=TMUB1 PE=1 SV=1	TMUB1	ENSG00000164897.12	14	3	0.714823	0.0183119	856166	863743	1.10046e+06	853253	1.13747e+06	1.04615e+06	1.26972e+06	1.26859e+06	760806	713618	953344	705378		464036	775341	1.26972e+06	1102377	787563	3	2	3	2		3	2	3	3	3	High	High	High	High	Not Found	High	Peak Found	High	High	High	21	9.46	7.16
High	P46459	Vesicle-fusing ATPase OS=Homo sapiens OX=9606 GN=NSF PE=1 SV=3	NSF	ENSG00000073969.18; ENSG00000278174.3; ENSG00000276262.2	134	17	1.17578	0.018466	1.42046e+07	1.61642e+07	1.77191e+07	1.50293e+07	1.29073e+07	1.36751e+07	1.3433e+07	1.30971e+07	1.26225e+07	1.33548e+07	1.53503e+07	1.24246e+07	256601	5.2656e+06	1.01352e+07	1.3433e+07	1.13811e+07	8.16674e+06	16	17	18	17	7	17	16	15	14	15	High	High	High	High	Peak Found	High	High	High	High	High	33	64.443	54.4
High	Q06210	Glutamine--fructose-6-phosphate aminotransferase [isomerizing] 1 OS=Homo sapiens OX=9606 GN=GFPT1 PE=1 SV=3	GFPT1	ENSG00000198380.12	396	27	0.91056	0.0185026	5.30551e+07	6.27486e+07	6.00811e+07	5.99017e+07	6.60057e+07	6.42837e+07	6.57625e+07	6.82109e+07	4.71458e+07	5.18424e+07	5.20493e+07	4.95203e+07	1.25036e+06	2.69273e+07	4.76431e+07	6.57625e+07	5.92738e+07	3.72468e+07	28	27	27	28	20	27	28	28	28	28	High	High	High	High	Peak Found	High	High	High	High	High	53	179.973	404.33
High	P38117	Electron transfer flavoprotein subunit beta OS=Homo sapiens OX=9606 GN=ETFB PE=1 SV=3	ETFB	ENSG00000105379.9	287	12	1.20685	0.0186163	6.85778e+07	5.55746e+07	5.31812e+07	5.98888e+07	4.52047e+07	4.98009e+07	4.58723e+07	5.00322e+07	6.09396e+07	4.59153e+07	4.60718e+07	4.95096e+07	3.97712e+06	1.84414e+07	3.69094e+07	4.58723e+07	4.34769e+07	2.85202e+07	14	14	14	14	12	14	14	14	14	14	High	High	High	High	High	High	High	High	High	High	51	82.49	265.29
High	Q8TDD1	ATP-dependent RNA helicase DDX54 OS=Homo sapiens OX=9606 GN=DDX54 PE=1 SV=2	DDX54	ENSG00000123064.12	45	10	0.823656	0.0186504	5.4097e+06	6.92288e+06	5.76607e+06	6.0307e+06	6.84267e+06	7.28425e+06	7.62479e+06	7.03821e+06	4.80716e+06	5.71963e+06	4.99525e+06	4.98553e+06	69859.3	2.7915e+06	5.39863e+06	7.62479e+06	6.11605e+06	3.73377e+06	8	9	10	8	1	9	9	10	10	9	High	High	High	High	Peak Found	High	High	High	High	High	17	48.644	5.7
High	Q9UNZ2	NSFL1 cofactor p47 OS=Homo sapiens OX=9606 GN=NSFL1C PE=1 SV=2	NSFL1C	ENSG00000088833.17	6	2	0.755495	0.0187031	564185	611206	671401	631498	741787	1.00697e+06	903100	728607	501346	504973	581647	522055		302615	746305	903100	633144	227077	2	2	2	2		2	2	2	2	2	Peak Found	High	Peak Found	High	Not Found	Peak Found	High	High	High	Peak Found	8	7.871	0
High	P05556	Integrin beta-1 OS=Homo sapiens OX=9606 GN=ITGB1 PE=1 SV=2	ITGB1	ENSG00000150093.18	138	17	0.832765	0.0187707	1.44675e+07	1.76925e+07	1.77015e+07	1.74674e+07	2.43352e+07	2.11298e+07	2.10909e+07	1.86861e+07	1.28561e+07	1.46174e+07	1.53351e+07	1.44402e+07	190244	9.92765e+06	1.56601e+07	2.10909e+07	1.62378e+07	1.11415e+07	16	16	16	16	7	16	16	16	16	15	High	High	High	High	Peak Found	High	High	High	High	High	29	72.787	99.82
High	Q9BTE6	Alanyl-tRNA editing protein Aarsd1 OS=Homo sapiens OX=9606 GN=AARSD1 PE=1 SV=2	AARSD1; PTGES3L-AARSD1	ENSG00000266967.6	27	5	1.17139	0.0188407	1.84568e+06	2.23123e+06	2.04366e+06	2.15251e+06	1.64692e+06	1.77925e+06	1.84564e+06	1.80297e+06	1.64011e+06	1.84342e+06	1.77046e+06	1.77946e+06	8954.26	671868	1.31867e+06	1.84564e+06	1.56674e+06	836527	4	5	5	5	1	4	4	5	4	5	High	High	High	High	Peak Found	High	High	High	High	High	21	22.123	5.55
High	Q96C19	EF-hand domain-containing protein D2 OS=Homo sapiens OX=9606 GN=EFHD2 PE=1 SV=1	EFHD2	ENSG00000142634.12	64	8	1.17119	0.0189154	6.93597e+06	7.27637e+06	7.99658e+06	7.65812e+06	6.02025e+06	6.73128e+06	6.85025e+06	5.73717e+06	6.16344e+06	6.01168e+06	6.92757e+06	6.33091e+06	46924	2.45599e+06	4.98881e+06	6.85025e+06	4.98547e+06	2.62016e+06	8	8	8	8	2	8	8	8	8	8	High	High	High	High	Peak Found	High	High	High	High	High	37	31.839	30.55
High	P30520	Adenylosuccinate synthetase isozyme 2 OS=Homo sapiens OX=9606 GN=ADSS2 PE=1 SV=3	ADSS	ENSG00000035687.9	130	14	0.896395	0.0190959	1.10796e+07	1.33288e+07	1.33045e+07	1.23994e+07	1.54283e+07	1.39707e+07	1.46124e+07	1.40624e+07	9.84555e+06	1.10122e+07	1.1526e+07	1.02505e+07	156859	6.29402e+06	1.03542e+07	1.46124e+07	1.22199e+07	8.38065e+06	12	12	12	12	6	12	13	13	12	14	High	High	High	High	Peak Found	High	High	High	High	High	45	80.701	115.08
High	Q96I24	Far upstream element-binding protein 3 OS=Homo sapiens OX=9606 GN=FUBP3 PE=1 SV=2	FUBP3	ENSG00000107164.15	96	9	0.889726	0.0191974	7.19381e+06	7.63616e+06	8.11991e+06	8.08083e+06	8.41716e+06	9.24781e+06	9.31703e+06	8.35275e+06	6.39256e+06	6.30894e+06	7.03442e+06	6.68036e+06	55489.7	3.43381e+06	6.85391e+06	9.31703e+06	7.25836e+06	3.80452e+06	9	9	9	9	2	9	8	9	9	8	High	High	High	High	Peak Found	High	High	High	High	High	27	52.635	80.06
High	Q13243	Serine/arginine-rich splicing factor 5 OS=Homo sapiens OX=9606 GN=SRSF5 PE=1 SV=1	SRSF5	ENSG00000100650.15	66	6	0.894636	0.0196114	6.43084e+06	7.2612e+06	7.47337e+06	6.60416e+06	7.70063e+06	7.64618e+06	7.86124e+06	7.79769e+06	5.71457e+06	5.99915e+06	6.47431e+06	5.45961e+06	25072.1	3.1415e+06	5.66688e+06	7.86124e+06	6.77602e+06	1.04776e+06	6	6	6	6	1	6	6	6	6	5	High	High	High	High	Peak Found	High	High	High	High	Peak Found	25	32.703	69.36
High	P62851	40S ribosomal protein S25 OS=Homo sapiens OX=9606 GN=RPS25 PE=1 SV=1	RPS25	ENSG00000280831.2; ENSG00000118181.10	162	3	0.825989	0.0196825	6.31278e+07	7.17612e+07	8.13281e+07	7.15451e+07	7.9295e+07	9.04497e+07	8.64669e+07	8.70297e+07	5.60966e+07	5.92885e+07	7.04559e+07	5.91458e+07	2.6109e+06	3.23487e+07	6.70357e+07	8.64669e+07	7.56269e+07	3.24651e+07	4	4	4	4	4	4	4	4	4	4	High	High	High	High	High	High	High	High	High	High	22	16.599	172.98
High	P26232	Catenin alpha-2 OS=Homo sapiens OX=9606 GN=CTNNA2 PE=1 SV=5	CTNNA2	ENSG00000066032.18	68	2	0.707662	0.0197013	1.22135e+06	1.41983e+06	1.46017e+06	794936	2.19471e+06	1.5735e+06	1.72535e+06	2.00691e+06	1.08532e+06	1.17305e+06	1.26497e+06	657168	16583.6	895343	1.16618e+06	1.72535e+06	1743961	1.10177e+06	2	2	2	1	1	2	2	2	2	2	High	High	High	High	Peak Found	High	High	High	High	High	11	36.444	52.15
High	P13674	Prolyl 4-hydroxylase subunit alpha-1 OS=Homo sapiens OX=9606 GN=P4HA1 PE=1 SV=2	P4HA1	ENSG00000122884.12	15	4	0.914099	0.0199832	1.09279e+06	1.12796e+06	1.12537e+06	1.1428e+06	1.29884e+06	1.27308e+06	1192002	1.15954e+06	971076	931916	974927	944745		529868	943532	1192002	1.00762e+06	475530	3	3	3	3		3	3	3	3	3	Peak Found	High	High	High	Not Found	High	High	High	High	Peak Found	10	11.355	4.09
High	P04818	Thymidylate synthase OS=Homo sapiens OX=9606 GN=TYMS PE=1 SV=3	TYMS	ENSG00000176890.15	65	7	2.28822	0.0200794	3.57737e+06	7.30061e+06	8.77959e+06	6.15018e+06	3.34043e+06	2.68306e+06	2.92909e+06	2.9492e+06	3.17892e+06	6.03171e+06	7.60591e+06	5.08431e+06	74710.2	1.36274e+06	1.98852e+06	2.92909e+06	2.56279e+06	2.86261e+06	5	6	6	6	2	5	4	4	4	6	High	High	High	High	Peak Found	High	High	High	High	High	33	34.816	64.55
High	Q15008	26S proteasome non-ATPase regulatory subunit 6 OS=Homo sapiens OX=9606 GN=PSMD6 PE=1 SV=1	PSMD6	ENSG00000163636.10	169	20	1.13354	0.0202895	2.29973e+07	2.56631e+07	2.48045e+07	2.60298e+07	1.99992e+07	2.21629e+07	2.30916e+07	2.23592e+07	2.04358e+07	2.12026e+07	2.14885e+07	2.15186e+07	519954	8.15876e+06	1.64257e+07	2.30916e+07	1.94296e+07	1.33615e+07	21	21	20	19	10	20	19	19	19	18	High	High	High	High	Peak Found	High	High	High	High	High	60	89.817	73.64
High	Q7Z417	Nuclear fragile X mental retardation-interacting protein 2 OS=Homo sapiens OX=9606 GN=NUFIP2 PE=1 SV=1	NUFIP2	ENSG00000108256.8	13	2	0.765036	0.0203461	341331	338535	361232	326935	359763	477794	472616	416056	303313	279695	312942	270275		146767	354111	472616	361544	166687	1	1	1	1		1	1	1	1	1	High	High	High	High	Not Found	High	High	High	High	Peak Found	3	6.278	0
High	O43707	Alpha-actinin-4 OS=Homo sapiens OX=9606 GN=ACTN4 PE=1 SV=2	ACTN4	ENSG00000282844.1; ENSG00000130402.11	1303	37	1.15151	0.0207426	2.40986e+08	2.78285e+08	2.85945e+08	2.55126e+08	2.37408e+08	2.31715e+08	2.31514e+08	2.28549e+08	2.14145e+08	2.29917e+08	2.47719e+08	2.10911e+08	5.87454e+07	9.68516e+07	1.71733e+08	2.31514e+08	1.98604e+08	1.38746e+08	42	42	41	43	24	43	42	43	43	42	High	High	High	High	High	High	High	High	High	High	70	457.092	1695.82
High	P35914	Hydroxymethylglutaryl-CoA lyase, mitochondrial OS=Homo sapiens OX=9606 GN=HMGCL PE=1 SV=2	HMGCL	ENSG00000117305.14	10	3	1.2413	0.0208919	1.11869e+06	1.49038e+06	1.25708e+06	1.16479e+06	957698	855331	1.06344e+06	993383	994092	1.23134e+06	1.08903e+06	962923	18170.9	390697	633918	1.06344e+06	863228	560772	3	3	3	3	1	3	2	3	3	3	High	High	Peak Found	High	Peak Found	High	Peak Found	High	Peak Found	Peak Found	10	11.083	1.79
High	Q8IYB7	DIS3-like exonuclease 2 OS=Homo sapiens OX=9606 GN=DIS3L2 PE=1 SV=4	DIS3L2	ENSG00000144535.19	14	3	0.678029	0.0209819	631131	729506	1.00147e+06	747732	931396	1.17892e+06	1.11758e+06	1.06114e+06	560836	602712	867588	618144		379967	873741	1.11758e+06	922107	708086	2	2	3	2		3	3	3	3	3	High	Peak Found	High	High	Not Found	Peak Found	High	High	High	High	5	8.386	0
High	Q99590	Protein SCAF11 OS=Homo sapiens OX=9606 GN=SCAF11 PE=1 SV=2	SCAF11	ENSG00000139218.17	8	3	0.792847	0.0210688	628537	711067	519454	741088	767780	994298	848671	840939	558530	587478	450012	612652		313219	736912	848671	730758		3	3	2	3		3	3	3	3		High	High	Peak Found	High	Not Found	Peak Found	Peak Found	High	High	Not Found	3	9.68	0
High	Q9BUP3	Oxidoreductase HTATIP2 OS=Homo sapiens OX=9606 GN=HTATIP2 PE=1 SV=2	HTATIP2	ENSG00000109854.13	49	6	1.19016	0.0211384	6.95737e+06	8.23436e+06	8.46541e+06	7.33319e+06	5.89551e+06	6.88126e+06	6.55331e+06	6.52693e+06	6.18246e+06	6.80317e+06	7.33373e+06	6.06229e+06	92151	2.4051e+06	5.09996e+06	6.55331e+06	5.67176e+06	3.28415e+06	6	6	6	6	3	6	6	6	6	6	High	High	High	High	Peak Found	High	High	High	High	High	31	34.173	22.03
High	Q14739	Delta(14)-sterol reductase LBR OS=Homo sapiens OX=9606 GN=LBR PE=1 SV=2	LBR	ENSG00000143815.14	180	10	0.858362	0.0211599	2.47274e+07	2.86535e+07	2.75893e+07	2.91256e+07	2.90557e+07	3.34097e+07	3.21137e+07	3.44015e+07	2.19733e+07	2.36733e+07	2.39011e+07	2.40779e+07	716012	1.18534e+07	2.47612e+07	3.21137e+07	2.98941e+07	1.93217e+07	11	11	11	11	7	11	11	11	11	11	High	High	High	High	High	High	High	High	High	High	21	66.969	120.18
High	Q8NI27	THO complex subunit 2 OS=Homo sapiens OX=9606 GN=THOC2 PE=1 SV=2	THOC2	ENSG00000125676.19	58	11	0.638535	0.0212682	3.34304e+06	3.9749e+06	3.89258e+06	4.50176e+06	9.51676e+06	5.54105e+06	5.83587e+06	6.48528e+06	2.97069e+06	3.28404e+06	3.37221e+06	3.72157e+06	62364.4	3.8824e+06	4.10668e+06	5.83587e+06	5.63556e+06	2.0447e+06	9	9	9	11	3	10	10	10	11	8	High	High	High	High	Peak Found	High	High	High	High	High	12	47.907	14.77
High	Q9NZ45	CDGSH iron-sulfur domain-containing protein 1 OS=Homo sapiens OX=9606 GN=CISD1 PE=1 SV=1	CISD1	ENSG00000122873.11	14	2	1.34193	0.0212941	2.3169e+06	2.50691e+06	2.46747e+06	2.24511e+06	1.33618e+06	1.89557e+06	1.66974e+06	2.2161e+06	2.05884e+06	2.07119e+06	2.13761e+06	1.85602e+06	45274.4	545098	1.40488e+06	1.66974e+06	1.92575e+06	929677	2	2	2	2	1	2	2	2	2	2	High	High	High	High	Peak Found	Peak Found	High	Peak Found	High	High	26	9.436	0
High	O75489	NADH dehydrogenase [ubiquinone] iron-sulfur protein 3, mitochondrial OS=Homo sapiens OX=9606 GN=NDUFS3 PE=1 SV=1	NDUFS3	ENSG00000213619.9	106	11	1.35816	0.0213582	1.47596e+07	1.6513e+07	1.67518e+07	1.43286e+07	1.47036e+07	1.01441e+07	1.09001e+07	1.21255e+07	1.31157e+07	1.36429e+07	1.45123e+07	1.18454e+07	316418	5.99838e+06	7.51818e+06	1.09001e+07	1.05368e+07	5.78781e+06	11	11	11	10	8	10	11	11	11	11	High	High	High	High	Peak Found	High	High	High	High	High	53	61.578	90.5
High	Q9UHX1	Poly(U)-binding-splicing factor PUF60 OS=Homo sapiens OX=9606 GN=PUF60 PE=1 SV=1	PUF60	ENSG00000274081.4; ENSG00000179950.13	92	12	0.883325	0.0213654	1.17946e+07	1.35332e+07	1.29714e+07	1.26629e+07	1.57556e+07	1.38886e+07	1.51316e+07	1.37276e+07	1.04809e+07	1.1181e+07	1.12373e+07	1.04683e+07	141125	6.42757e+06	1.02934e+07	1.51316e+07	1.1929e+07	7.07224e+06	12	12	12	14	6	14	12	14	12	14	High	High	High	High	Peak Found	High	High	High	High	High	34	67.475	82.27
High	P55809	Succinyl-CoA:3-ketoacid coenzyme A transferase 1, mitochondrial OS=Homo sapiens OX=9606 GN=OXCT1 PE=1 SV=1	OXCT1	ENSG00000083720.12	50	10	1.61631	0.0213774	1.14706e+07	1.24645e+07	1.27133e+07	1.09085e+07	1.14142e+07	6.17898e+06	7.75593e+06	7.05251e+06	1.0193e+07	1.02981e+07	1.10137e+07	9.01798e+06	173491	4.65647e+06	4.57948e+06	7.75593e+06	6.12847e+06	3.32349e+06	10	10	10	10	5	10	8	10	10	9	High	High	High	High	Peak Found	High	High	High	High	High	39	64.599	30.01
High	Q00535	Cyclin-dependent-like kinase 5 OS=Homo sapiens OX=9606 GN=CDK5 PE=1 SV=3	CDK5	ENSG00000164885.12	9	2	1.19153	0.0214352	917225	1.07913e+06	1.08386e+06	1.04571e+06	843549	911271	872014	944730	815064	891566	938970	864480		344129	675378	872014	820950	500693	2	2	2	2		2	2	2	2	2	Peak Found	High	Peak Found	Peak Found	Not Found	Peak Found	Peak Found	High	Peak Found	Peak Found	10	6.983	3.9
High	P36957	Dihydrolipoyllysine-residue succinyltransferase component of 2-oxoglutarate dehydrogenase complex, mitochondrial OS=Homo sapiens OX=9606 GN=DLST PE=1 SV=4	DLST	ENSG00000119689.14	50	9	1.15817	0.021517	9.84689e+06	1.12634e+07	1.13094e+07	1.02601e+07	8.60357e+06	9.39523e+06	9.89721e+06	9.18886e+06	8.75014e+06	9.30575e+06	9.79755e+06	8.48191e+06	156876	3.50986e+06	6.96316e+06	9.89721e+06	7.98492e+06	3.41833e+06	10	9	10	10	4	10	10	9	10	9	High	High	High	High	Peak Found	High	High	High	High	High	24	46.436	34.92
High	Q8N7H5	RNA polymerase II-associated factor 1 homolog OS=Homo sapiens OX=9606 GN=PAF1 PE=1 SV=2	PAF1	ENSG00000006712.14	16	4	0.886611	0.0216369	947280	1.13941e+06	1.05748e+06	1.04896e+06	1.17295e+06	1.13659e+06	1.25343e+06	1.20289e+06	841772	941376	916112	867166		478508	842369	1.25343e+06	1.04528e+06	75549.2	3	3	3	3		3	3	3	3	1	High	High	High	High	Not Found	High	High	High	High	Peak Found	11	14.294	1.71
High	Q86W42	THO complex subunit 6 homolog OS=Homo sapiens OX=9606 GN=THOC6 PE=1 SV=1	THOC6	ENSG00000131652.13	13	5	1.34226	0.0216988	1.47092e+06	1.93203e+06	1.86261e+06	1.74374e+06	1.55607e+06	1.40464e+06	1.28214e+06	1.23167e+06	1.30709e+06	1.59622e+06	1.61361e+06	1.44154e+06	21870.2	634807	1.04103e+06	1.28214e+06	1.0703e+06	702945	4	4	4	4	1	4	4	4	4	3	High	High	High	High	Peak Found	High	High	Peak Found	Peak Found	Peak Found	22	16.694	1.61
High	Q99832	T-complex protein 1 subunit eta OS=Homo sapiens OX=9606 GN=CCT7 PE=1 SV=2	CCT7	ENSG00000135624.15	715	26	0.922141	0.0218558	1.4046e+08	1.59535e+08	1.50934e+08	1.57808e+08	1.69757e+08	1.62131e+08	1.65053e+08	1.69801e+08	1.24816e+08	1.31806e+08	1.30757e+08	1.30458e+08	4.05547e+06	6.92529e+07	1.20161e+08	1.65053e+08	1.47554e+08	1.06114e+08	32	31	31	32	24	33	31	32	33	34	High	High	High	High	High	High	High	High	High	High	69	277.025	914.98
High	Q99816	Tumor susceptibility gene 101 protein OS=Homo sapiens OX=9606 GN=TSG101 PE=1 SV=2	TSG101	ENSG00000074319.12	49	10	1.28129	0.0221656	6.90916e+06	7.80977e+06	7.2185e+06	6.26434e+06	4.78067e+06	5.63331e+06	6.50492e+06	5.3928e+06	6.13961e+06	6.45237e+06	6.25351e+06	5.17868e+06	42994.6	1.95029e+06	4.17506e+06	6.50492e+06	4.68622e+06	2.51235e+06	8	9	9	8	2	8	8	9	8	8	High	High	High	High	Peak Found	High	High	High	High	High	32	36.637	14.71
High	O95834	Echinoderm microtubule-associated protein-like 2 OS=Homo sapiens OX=9606 GN=EML2 PE=1 SV=1	EML2	ENSG00000125746.16	13	3	3.48142	0.022188	493966	1.49449e+06	1.27168e+06	1.30744e+06	203831	632113	240996	499831	438948	1.23473e+06	1.10168e+06	1.08085e+06		83153.8	468483	240996	434342	124069	2	3	3	3		1	2	1	2	1	High	High	High	High	Not Found	Peak Found	Peak Found	High	High	Peak Found	7	13.58	1.93
High	P39656	Dolichyl-diphosphooligosaccharide--protein glycosyltransferase 48 kDa subunit OS=Homo sapiens OX=9606 GN=DDOST PE=1 SV=4	DDOST	ENSG00000244038.9	179	11	0.842464	0.0222423	1.97007e+07	2.05273e+07	2.30792e+07	2.03848e+07	2.67878e+07	2.25772e+07	2.37231e+07	2.48394e+07	1.75064e+07	1.69595e+07	1.99939e+07	1.6852e+07	306023	1.09282e+07	1.67328e+07	2.37231e+07	21584900	1.48467e+07	11	10	10	11	6	11	11	11	11	11	High	High	High	High	Peak Found	High	High	High	High	High	38	71.064	190.61
High	P46781	40S ribosomal protein S9 OS=Homo sapiens OX=9606 GN=RPS9 PE=1 SV=3	RPS9	ENSG00000274005.3; ENSG00000275323.3; ENSG00000277079.3; ENSG00000278081.3; ENSG00000277359.3; ENSG00000170889.13; ENSG00000274950.4; ENSG00000274626.3; ENSG00000278270.4; ENSG00000274646.4	349	8	0.817085	0.0223326	8.75628e+07	9.72182e+07	1.04041e+08	9.54124e+07	1.01047e+08	1.21843e+08	1.1391e+08	1.25511e+08	7.78101e+07	8.03209e+07	9.01323e+07	7.88767e+07	2.80997e+06	4.12227e+07	9.03028e+07	1.1391e+08	1.09066e+08	7.17664e+07	9	9	9	9	8	9	9	9	9	9	High	High	High	High	High	High	High	High	High	High	34	30.149	290.67
High	P16435	NADPH--cytochrome P450 reductase OS=Homo sapiens OX=9606 GN=POR PE=1 SV=2	POR		218	20	0.851386	0.0223385	1.89275e+07	2.26372e+07	2.16911e+07	2.0741e+07	2.86308e+07	2.41707e+07	2.56682e+07	2.31044e+07	1.68194e+07	1.87027e+07	1.87914e+07	1.71465e+07	299882	1.168e+07	1.79138e+07	2.56682e+07	2.00772e+07	14888493	18	20	19	19	10	21	22	22	20	21	High	High	High	High	Peak Found	High	High	High	High	High	45	141.747	203.52
High	P33991	DNA replication licensing factor MCM4 OS=Homo sapiens OX=9606 GN=MCM4 PE=1 SV=5	MCM4	ENSG00000104738.16	295	27	0.915651	0.0223403	3.9499e+07	4.61014e+07	4.50118e+07	4.35767e+07	4.78945e+07	4.7212e+07	5.18219e+07	4.88548e+07	3.50996e+07	3.80886e+07	3.89945e+07	3.60245e+07	678310	1.95387e+07	3.49906e+07	5.18219e+07	4.24537e+07	2.41798e+07	27	27	27	26	12	26	27	27	27	27	High	High	High	High	Peak Found	High	High	High	High	High	46	183.094	310.04
High	P13667	Protein disulfide-isomerase A4 OS=Homo sapiens OX=9606 GN=PDIA4 PE=1 SV=2	PDIA4	ENSG00000155660.10	352	27	0.876018	0.0225909	5.0899e+07	6.05009e+07	5.71941e+07	5.71336e+07	5.96189e+07	6.52415e+07	6.75167e+07	6.52669e+07	4.52299e+07	4.99854e+07	4.95482e+07	4.72319e+07	886304	2.43218e+07	4.83529e+07	6.75167e+07	5.67155e+07	2.61174e+07	26	26	28	27	13	28	27	28	26	26	High	High	High	High	High	High	High	High	High	High	60	200.984	395.51
High	P50225	Sulfotransferase 1A1 OS=Homo sapiens OX=9606 GN=SULT1A1 PE=1 SV=3	SULT1A1	ENSG00000196502.11	32	2	0.577459	0.0227847	634789	657109	544829	316666	1.39546e+06	696191	1.03991e+06	1.00286e+06	564086	542898	471995	261786	27890.6	569283	515974	1.03991e+06	871464	591067	2	2	2	2	1	2	2	2	2	2	High	High	High	High	Peak Found	High	High	High	High	High	32	19.994	9.23
High	P30825	High affinity cationic amino acid transporter 1 OS=Homo sapiens OX=9606 GN=SLC7A1 PE=1 SV=1	SLC7A1	ENSG00000139514.12	20	3	0.798547	0.0228087	1.39253e+06	1.80369e+06	1.63862e+06	1.84102e+06	1.81534e+06	2.20475e+06	2166850	2.14387e+06	1.23743e+06	1.4902e+06	1.41957e+06	1.52196e+06	24586.5	740573	1.63403e+06	2166850	1.86298e+06	1.24316e+06	2	2	3	3	1	3	3	3	3	3	High	High	High	Peak Found	Peak Found	High	High	High	High	High	6	10.272	9.94
High	P53999	Activated RNA polymerase II transcriptional coactivator p15 OS=Homo sapiens OX=9606 GN=SUB1 PE=1 SV=3	SUB1	ENSG00000113387.11	48	3	1.2349	0.0228239	1.28505e+07	1.23997e+07	1.50401e+07	1.38104e+07	9.06375e+06	1.11531e+07	1.23971e+07	1.04364e+07	1.14192e+07	1.02445e+07	1.30295e+07	1.1417e+07	166577	3.69759e+06	8.26596e+06	1.23971e+07	9.06901e+06	874421	3	3	3	3	1	4	4	4	3	1	High	High	High	High	Peak Found	High	High	High	High	Peak Found	26	19.071	50.66
High	P28482	Mitogen-activated protein kinase 1 OS=Homo sapiens OX=9606 GN=MAPK1 PE=1 SV=3	MAPK1	ENSG00000100030.14	90	8	0.792341	0.0229967	4.40663e+06	5.07736e+06	4.71182e+06	5.91366e+06	5.74859e+06	5.98522e+06	6.36952e+06	6.67339e+06	3.91582e+06	4.19487e+06	4.08193e+06	4.88878e+06	47654	2.34516e+06	4.43588e+06	6.36952e+06	5.79903e+06	3.42323e+06	7	7	7	8	2	7	7	7	7	7	High	High	High	High	Peak Found	High	High	High	High	High	39	54.511	59.33
High	P47813	Eukaryotic translation initiation factor 1A, X-chromosomal OS=Homo sapiens OX=9606 GN=EIF1AX PE=1 SV=2	EIF1AX; LOC101060318; LOC107984923	ENSG00000173674.10	41	3	0.916825	0.0230206	9.89013e+06	1.11616e+07	1.05204e+07	1.11867e+07	1.26922e+07	1.1524e+07	1.21251e+07	1.14978e+07	8.78857e+06	9221623	9.11403e+06	9.24796e+06	65925.4	5.17782e+06	8.54087e+06	1.21251e+07	9.99135e+06	1.58742e+06	3	3	3	3	1	3	3	3	3	3	High	High	High	High	Peak Found	High	High	High	High	High	24	15.623	38.45
High	Q13045	Protein flightless-1 homolog OS=Homo sapiens OX=9606 GN=FLII PE=1 SV=2	FLII	ENSG00000177731.15; ENSG00000284571.1	185	25	0.910916	0.0230257	1.3351e+07	1.4705e+07	1.53082e+07	1.39844e+07	1.59401e+07	1.53347e+07	1.63476e+07	1.5555e+07	1.1864e+07	1.21492e+07	1.32617e+07	11560775	228143	6.50285e+06	1.13652e+07	1.63476e+07	1.35169e+07	8.58992e+06	24	24	24	25	5	25	25	26	25	23	High	High	High	High	Peak Found	High	High	High	High	High	30	127.157	121.7
High	O43708	Maleylacetoacetate isomerase OS=Homo sapiens OX=9606 GN=GSTZ1 PE=1 SV=3	GSTZ1		12	2	1.2795	0.0231818	1.0248e+06	1.50371e+06	1.20047e+06	1.10106e+06	915192	757001	920349	883579	910656	1.24236e+06	1.03998e+06	910241		373356	561042	920349	767811	492920	2	2	2	2		2	2	2	2	2	High	High	High	High	Not Found	High	Peak Found	High	High	High	13	7.715	3.77
High	Q3KQV9	UDP-N-acetylhexosamine pyrophosphorylase-like protein 1 OS=Homo sapiens OX=9606 GN=UAP1L1 PE=1 SV=2	UAP1L1	ENSG00000197355.10	86	13	0.779086	0.0232915	5.27946e+06	5.99689e+06	6.35827e+06	5.49939e+06	9.5251e+06	7.10986e+06	7.64626e+06	6.80044e+06	4.69144e+06	4.95459e+06	5.50828e+06	4.5463e+06	49894.7	3.88581e+06	5.26939e+06	7.64626e+06	5.90943e+06	3.51467e+06	11	13	13	13	2	12	12	12	12	13	High	High	High	High	Peak Found	High	High	High	High	High	38	70.428	59.04
High	P22570	NADPH:adrenodoxin oxidoreductase, mitochondrial OS=Homo sapiens OX=9606 GN=FDXR PE=1 SV=3	FDXR		15	4	1.47643	0.0233453	2.37921e+06	1.93546e+06	1.88562e+06	1.80526e+06	974054	1.44658e+06	1.14146e+06	1.78415e+06	2.11421e+06	1.59906e+06	1.63354e+06	1.4924e+06	47746	397369	1.07212e+06	1.14146e+06	1.55039e+06	607268	4	3	4	3	2	3	3	3	4	3	High	High	High	High	Peak Found	High	High	High	High	Peak Found	11	10.795	0
High	Q04828	Aldo-keto reductase family 1 member C1 OS=Homo sapiens OX=9606 GN=AKR1C1 PE=1 SV=1	AKR1C1	ENSG00000187134.13	596	2	0.242343	0.0234197	1.24646e+06	1.37915e+06	1.19763e+06	1.23138e+06	5.97546e+06	2.62997e+06	9.20888e+06	4.24908e+06	1.10763e+06	1.13945e+06	1.03752e+06	1.01797e+06	167574	2.43771e+06	1.94917e+06	9.20888e+06	3.69236e+06	5.79898e+06	2	2	2	2	1	2	2	2	2	2	Peak Found	High	High	High	Peak Found	High	High	High	High	High	70	177.352	731.36
High	P30050	60S ribosomal protein L12 OS=Homo sapiens OX=9606 GN=RPL12 PE=1 SV=1	RPL12	ENSG00000197958.12	236	7	0.863243	0.0234456	7.40894e+07	8.42987e+07	8.68106e+07	7.94311e+07	8.58983e+07	1.02308e+08	9.35216e+07	9.61466e+07	6.58373e+07	6.9647e+07	7.52055e+07	6.56651e+07	1.63365e+06	3.50426e+07	7.58243e+07	9.35216e+07	8.35493e+07	5.73492e+07	9	9	8	9	7	8	8	8	8	8	High	High	High	High	High	High	High	High	High	High	59	76.812	338.29
High	P18583	Protein SON OS=Homo sapiens OX=9606 GN=SON PE=1 SV=4	SON	ENSG00000159140.19	39	9	0.855633	0.0234818	2.81385e+06	3.43762e+06	3.10853e+06	3.26956e+06	3.72554e+06	3.75337e+06	3.36969e+06	3.7287e+06	2.50045e+06	2.84013e+06	2.69297e+06	2.70292e+06	13536.9	1.51985e+06	2.78176e+06	3.36969e+06	3.24016e+06	1.30789e+06	7	7	7	8	1	6	7	7	7	8	High	High	High	High	Peak Found	High	High	High	High	High	6	39.475	13.54
High	P48444	Coatomer subunit delta OS=Homo sapiens OX=9606 GN=ARCN1 PE=1 SV=1	ARCN1	ENSG00000095139.13	145	14	0.928797	0.0235514	1.59067e+07	1.73497e+07	1.78721e+07	1.6538e+07	1.82694e+07	1.80156e+07	1.86127e+07	1.82162e+07	1.4135e+07	1.43342e+07	1.54829e+07	1.36718e+07	223045	7.45308e+06	1.33521e+07	1.86127e+07	1.58295e+07	8.90032e+06	14	14	14	14	5	13	14	14	14	14	High	High	High	High	Peak Found	High	High	High	High	High	31	60.484	126.95
High	Q8IY67	Ribonucleoprotein PTB-binding 1 OS=Homo sapiens OX=9606 GN=RAVER1 PE=1 SV=1	RAVER1	ENSG00000161847.13	62	7	0.804768	0.0236623	3.17504e+06	3.06099e+06	2.75082e+06	2.5041e+06	4.4165e+06	3.72968e+06	3.49204e+06	3.30514e+06	2.8214e+06	2.52897e+06	2.38308e+06	2.07012e+06		1.80173e+06	2.76421e+06	3.49204e+06	2872097	1.44462e+06	7	6	5	6		7	7	6	6	5	High	High	High	High	Not Found	High	High	High	High	High	23	35.78	31.82
High	P08243	Asparagine synthetase [glutamine-hydrolyzing] OS=Homo sapiens OX=9606 GN=ASNS PE=1 SV=4	ASNS	ENSG00000070669.16	84	16	0.804929	0.023732	1.34773e+07	1.55915e+07	1.61722e+07	1.41058e+07	1.57044e+07	1.91529e+07	1.92282e+07	1.77414e+07	1.19762e+07	1.28816e+07	1.40102e+07	1.16612e+07	3.63291e+06	6.40667e+06	1.41949e+07	1.92282e+07	1.54169e+07	1.17497e+07	12	11	12	12	6	12	13	13	13	13	High	High	High	High	Peak Found	High	High	High	High	High	37	58.554	48.13
High	Q03252	Lamin-B2 OS=Homo sapiens OX=9606 GN=LMNB2 PE=1 SV=4	LMNB2	ENSG00000176619.12	189	18	0.826144	0.0237328	1.84486e+07	2.0604e+07	2.02691e+07	2.22305e+07	2.13476e+07	2.52778e+07	2.52674e+07	2.42072e+07	1.63938e+07	1.70229e+07	1.75595e+07	1.83778e+07	229928	8.70884e+06	1.87344e+07	2.52674e+07	2.10355e+07	1.01315e+07	17	17	18	18	8	17	17	18	17	17	High	High	High	High	Peak Found	High	High	High	High	High	43	86.824	160.08
High	Q8WZ42	Titin OS=Homo sapiens OX=9606 GN=TTN PE=1 SV=4	TTN	ENSG00000155657.26	5	3	1.21644	0.0237406	1.52036e+06	1.49202e+06	1.73741e+06	1.78437e+06	1.22146e+06	1.49794e+06	1.30729e+06	1.37084e+06	1.35102e+06	1.23269e+06	1.50515e+06	1.47512e+06	23768.7	498301	1.11018e+06	1.30729e+06	1.19123e+06	723417	2	2	2	2	1	2	2	2	2	2	High	Peak Found	High	High	Peak Found	Peak Found	High	Peak Found	Peak Found	High	0	6.313	0
High	P61803	Dolichyl-diphosphooligosaccharide--protein glycosyltransferase subunit DAD1 OS=Homo sapiens OX=9606 GN=DAD1 PE=1 SV=3	DAD1	ENSG00000129562.10	38	4	0.880088	0.0239083	5.87081e+06	6.72032e+06	6.88241e+06	6.73234e+06	6.91391e+06	7.93526e+06	7.44235e+06	7.84322e+06	5.21692e+06	5.55228e+06	5.96235e+06	5.56557e+06	57000.7	2.82056e+06	5.88112e+06	7.44235e+06	6.81558e+06	4.38554e+06	4	4	4	4	1	4	4	4	4	4	High	High	High	High	Peak Found	High	High	High	High	High	36	15.217	30.58
High	P46779	60S ribosomal protein L28 OS=Homo sapiens OX=9606 GN=RPL28 PE=1 SV=3	RPL28	ENSG00000108107.14	111	5	0.795923	0.0239099	2.88709e+07	3.48077e+07	3.29648e+07	3.38437e+07	3.3986e+07	4.28682e+07	4.45169e+07	4.10703e+07	2.56553e+07	2.87578e+07	2.8558e+07	2.79784e+07	755284	13864749	3.17712e+07	4.45169e+07	3.56892e+07	1.6867e+07	5	5	5	5	4	5	5	6	5	5	High	High	High	High	High	High	High	High	High	High	36	22.946	125.97
High	Q8N442	Translation factor GUF1, mitochondrial OS=Homo sapiens OX=9606 GN=GUF1 PE=1 SV=1	GUF1	ENSG00000151806.13	11	2	1.65271	0.0239776	722708	900040	1.07985e+06	1.08435e+06		665241	598984	385554	642213	743606	935494	896420	9934.88		493035	598984	335038		1	1	2	2	1		1	1	1		High	Peak Found	High	Peak Found	Peak Found	Not Found	High	High	High	High	4	10.932	2.39
High	Q9P258	Protein RCC2 OS=Homo sapiens OX=9606 GN=RCC2 PE=1 SV=2	RCC2	ENSG00000281540.2; ENSG00000179051.13	98	12	0.808084	0.0240039	9.78243e+06	1.13881e+07	1.05888e+07	1.09742e+07	1.09644e+07	1.34205e+07	1.32637e+07	1.37272e+07	8.69287e+06	9.40875e+06	9.17331e+06	9.07233e+06	144394	4.47297e+06	9.94647e+06	1.32637e+07	1.19286e+07	6.58357e+06	12	12	12	12	4	12	11	12	12	11	High	High	High	High	Peak Found	High	High	High	High	High	31	49.669	52.34
High	Q9BW60	Elongation of very long chain fatty acids protein 1 OS=Homo sapiens OX=9606 GN=ELOVL1 PE=1 SV=1	ELOVL1	ENSG00000066322.14	11	2	0.806182	0.0240726	742952	803892	729384	753312	804899	1.0011e+06	999880	856109	660202	664170	631878	622757		328362	741951	999880	743940	560782	2	2	2	2		2	2	2	2	2	Peak Found	High	Peak Found	High	Not Found	High	High	High	High	High	9	8.257	0
High	P60228	Eukaryotic translation initiation factor 3 subunit E OS=Homo sapiens OX=9606 GN=EIF3E PE=1 SV=1	EIF3E	ENSG00000104408.9	230	21	0.868029	0.0241268	2.39335e+07	3.06467e+07	2.92262e+07	2.95025e+07	3.122e+07	3.31749e+07	3.54002e+07	3.44826e+07	2.12678e+07	2.532e+07	2.53192e+07	2.43895e+07	414796	1.27363e+07	2.45872e+07	3.54002e+07	2.99646e+07	2.04091e+07	20	22	21	22	9	20	21	21	20	19	High	High	High	High	Peak Found	High	High	High	High	High	60	126.445	160.15
High	Q29RF7	Sister chromatid cohesion protein PDS5 homolog A OS=Homo sapiens OX=9606 GN=PDS5A PE=1 SV=1	PDS5A	ENSG00000121892.14	40	12	0.917135	0.0243347	5.04324e+06	5.4743e+06	5.40113e+06	5.10198e+06	5.83511e+06	5.41666e+06	5.76116e+06	5.69093e+06	4.48153e+06	4.52283e+06	4.67909e+06	4.21776e+06	31245.9	2.38046e+06	4.01449e+06	5.76116e+06	4.94529e+06	3.00683e+06	10	10	10	10	1	11	10	11	11	10	High	High	High	High	Peak Found	High	High	High	High	High	13	39.625	9.6
High	P38159	RNA-binding motif protein, X chromosome OS=Homo sapiens OX=9606 GN=RBMX PE=1 SV=3	RBMX	ENSG00000147274.14	180	12	1.06222	0.0243433	3.7314e+07	3.88974e+07	3.89418e+07	4.01576e+07	3.6957e+07	3.77087e+07	3.58542e+07	3.63229e+07	3.3158e+07	3.21367e+07	3.37359e+07	3.3198e+07	574643	1.50768e+07	2.79474e+07	3.58542e+07	3.15638e+07	1.19975e+07	12	12	12	12	7	12	12	12	12	12	High	High	High	High	High	High	High	High	High	High	32	39.956	196.92
High	Q99627	COP9 signalosome complex subunit 8 OS=Homo sapiens OX=9606 GN=COPS8 PE=1 SV=1	COPS8	ENSG00000198612.10	24	3	1.11129	0.0244927	2.77561e+06	3.11579e+06	2.89796e+06	2.81405e+06	2.53109e+06	2.4599e+06	2.60888e+06	2.77977e+06	2.46646e+06	2.57425e+06	2.51055e+06	2.32635e+06	51349.2	1.03257e+06	1.82313e+06	2.60888e+06	2.41556e+06	1.58704e+06	3	4	3	4	1	3	3	3	3	3	High	High	High	High	Peak Found	High	Peak Found	High	High	High	31	27.188	11.71
High	O14936	Peripheral plasma membrane protein CASK OS=Homo sapiens OX=9606 GN=CASK PE=1 SV=3	CASK	ENSG00000147044.20	42	9	1.2721	0.0245179	2.93766e+06	3.47774e+06	3.28589e+06	3.29825e+06	3.03101e+06	2.11836e+06	2.71606e+06	2.45975e+06	2.61046e+06	2.87328e+06	2.84663e+06	2.72664e+06		1.23651e+06	1.57e+06	2.71606e+06	2.13747e+06	1.53773e+06	9	9	9	9		9	8	9	8	8	High	High	High	High	Not Found	High	Peak Found	High	High	High	16	32.874	18.17
High	O75608	Acyl-protein thioesterase 1 OS=Homo sapiens OX=9606 GN=LYPLA1 PE=1 SV=1	LYPLA1	ENSG00000120992.17	56	5	1.11459	0.024597	6.47203e+06	7.15108e+06	6.54809e+06	7.14233e+06	6.33361e+06	5.94934e+06	6.42315e+06	5.92892e+06	5.75117e+06	5.90817e+06	5.67272e+06	5.90451e+06	285745	2.58382e+06	4.40928e+06	6.42315e+06	5.1521e+06	4.71807e+06	5	5	5	5	3	5	5	5	5	5	High	High	High	High	Peak Found	High	High	High	High	High	31	22.413	24.87
High	Q53T59	HCLS1-binding protein 3 OS=Homo sapiens OX=9606 GN=HS1BP3 PE=1 SV=1	HS1BP3	ENSG00000118960.12	34	6	0.72428	0.0245982	4.9533e+06	5.67035e+06	5.74099e+06	6.49904e+06	7.08731e+06	6.37856e+06	8.66811e+06	8.84279e+06	4.40161e+06	4.6848e+06	4.97352e+06	5.3727e+06	162870	2.8913e+06	4.72739e+06	8.66811e+06	7.68419e+06	2.8914e+06	3	4	4	5	2	5	5	6	6	4	High	High	High	High	Peak Found	High	High	High	High	High	22	18.899	2.21
High	Q96T88	E3 ubiquitin-protein ligase UHRF1 OS=Homo sapiens OX=9606 GN=UHRF1 PE=1 SV=1	UHRF1	ENSG00000276043.4	73	10	0.879415	0.0248209	4.02506e+06	4.72279e+06	4.85012e+06	4.18746e+06	5.47069e+06	5.12964e+06	4.94904e+06	5.00238e+06	3.57675e+06	3.90194e+06	4.20174e+06	3.46174e+06	252339	2.23179e+06	3.80177e+06	4.94904e+06	4.34696e+06	2.32009e+06	10	11	11	10	1	11	10	10	10	10	High	High	High	High	Peak Found	High	High	High	High	High	20	49.839	27.88
High	P06703	Protein S100-A6 OS=Homo sapiens OX=9606 GN=S100A6 PE=1 SV=1	S100A6	ENSG00000197956.9	159	5	0.800542	0.0249073	4.1963e+07	4.8806e+07	4.41074e+07	3.86189e+07	5.43671e+07	5.31481e+07	6.46255e+07	4.87118e+07	3.72892e+07	4.03232e+07	3.8211e+07	3.19259e+07	1.19449e+06	2.21793e+07	3.93901e+07	6.46255e+07	4.23295e+07	5.0941e+07	7	6	6	5	5	6	5	5	5	7	High	High	High	High	High	High	High	High	High	High	66	55.771	126.3
High	O00571	ATP-dependent RNA helicase DDX3X OS=Homo sapiens OX=9606 GN=DDX3X PE=1 SV=3	DDX3X	ENSG00000215301.9	367	23	0.864485	0.0249993	4.939e+07	5.75627e+07	6.02393e+07	5.17343e+07	7.0855e+07	6.31785e+07	6.32518e+07	6.09969e+07	4.38889e+07	4.75579e+07	5.21864e+07	4.27684e+07	1.35029e+06	2.89056e+07	4.6824e+07	6.32518e+07	5.3005e+07	2.78261e+07	23	23	23	23	21	24	24	24	23	24	High	High	High	High	High	High	High	High	High	High	47	162.799	390.06
High	P54709	Sodium/potassium-transporting ATPase subunit beta-3 OS=Homo sapiens OX=9606 GN=ATP1B3 PE=1 SV=1	ATP1B3	ENSG00000069849.10	58	5	1.17853	0.0251121	6.86392e+06	7.94974e+06	8.18452e+06	7.55696e+06	5.70441e+06	6.93769e+06	6.80282e+06	6.35484e+06	6.09941e+06	6.56801e+06	7.09039e+06	6.24728e+06	135071	2.32714e+06	5.14179e+06	6.80282e+06	5.52221e+06	3.60033e+06	5	5	5	5	3	5	5	5	5	5	High	High	High	High	Peak Found	High	High	High	High	High	24	23.019	32.64
High	Q7Z7H5	Transmembrane emp24 domain-containing protein 4 OS=Homo sapiens OX=9606 GN=TMED4 PE=1 SV=1	TMED4	ENSG00000158604.14	32	2	1.90516	0.0254125	3.40983e+06	3.6355e+06	3.34634e+06	3.40846e+06	2.41888e+06	3.16155e+06	1.15997e+06	1.15113e+06	3030040	3.00362e+06	2.89899e+06	2.81775e+06		986793	2.34314e+06	1.15997e+06	1.00031e+06	1.54901e+06	2	2	2	2		2	2	1	1	2	High	High	High	High	Not Found	High	High	High	High	High	15	16.583	15.61
High	Q9NUQ6	SPATS2-like protein OS=Homo sapiens OX=9606 GN=SPATS2L PE=1 SV=2	SPATS2L	ENSG00000196141.13	11	4	0.711446	0.0255436	711919	806438	1.21292e+06	1.24816e+06	1.67411e+06	1.3823e+06	1.45609e+06	1.32548e+06	632625	666273	1.05078e+06	1.03185e+06		682961	1.02447e+06	1.45609e+06	1.15181e+06	380510	3	3	4	4		4	4	4	4	3	Peak Found	Peak Found	High	High	Not Found	High	High	High	High	High	10	13.446	5.65
High	P09960	Leukotriene A-4 hydrolase OS=Homo sapiens OX=9606 GN=LTA4H PE=1 SV=2	LTA4H	ENSG00000111144.9	162	20	0.879764	0.0255544	1.86407e+07	2.19052e+07	2.02721e+07	2.03369e+07	2.14963e+07	2.25424e+07	2.36166e+07	2.44907e+07	1.65645e+07	1.80979e+07	1.75621e+07	1.68124e+07	141145	8.76951e+06	1.67071e+07	2.36166e+07	2.12818e+07	1.32219e+07	18	18	18	18	5	18	17	19	18	18	High	High	High	High	Peak Found	High	High	High	High	High	43	108.963	98.53
High	O75208	Ubiquinone biosynthesis protein COQ9, mitochondrial OS=Homo sapiens OX=9606 GN=COQ9 PE=1 SV=1	COQ9	ENSG00000088682.13	11	2	0.821845	0.025604	626067	749605	694303	589638	728517	817564	789028	869907	556336	619318	601487	487449		297201	605928	789028	755930	508678	2	2	2	2		2	2	2	2	2	High	High	High	Peak Found	Not Found	High	High	High	High	High	12	9.57	2.42
High	O75150	E3 ubiquitin-protein ligase BRE1B OS=Homo sapiens OX=9606 GN=RNF40 PE=1 SV=5	RNF40	ENSG00000103549.21	18	2	0.724094	0.0256341	815930	855908	921835	945650	901308	1.26595e+06	1.18918e+06	1.2745e+06	725052	707145	798601	781761		367692	938244	1.18918e+06	1.10751e+06	530007	2	2	2	2		2	2	2	2	2	Peak Found	High	High	High	Not Found	Peak Found	Peak Found	High	Peak Found	Peak Found	4	11.725	11.9
High	Q8N8N7	Prostaglandin reductase 2 OS=Homo sapiens OX=9606 GN=PTGR2 PE=1 SV=1	PTGR2	ENSG00000140043.11	6	3	1.88494	0.0257583	1.02727e+06	605990	647366	1.06971e+06	412194	557179	476236	403196	912855	500665	560824	884318		168156	412946	476236	350368	545301	3	2	2	3		2	2	2	1	3	High	High	High	High	Not Found	Peak Found	Peak Found	Peak Found	Peak Found	Peak Found	17	7.837	0
High	P31040	Succinate dehydrogenase [ubiquinone] flavoprotein subunit, mitochondrial OS=Homo sapiens OX=9606 GN=SDHA PE=1 SV=2	SDHA	ENSG00000073578.16	161	20	1.14073	0.0258261	3.20381e+07	3.59947e+07	3.66591e+07	3.5389e+07	3.04231e+07	2.94771e+07	3.2154e+07	3.28619e+07	2.84697e+07	2.97385e+07	3.17584e+07	2.92558e+07	416022	1.24112e+07	2.18466e+07	3.2154e+07	2.85563e+07	1.47082e+07	21	21	21	20	8	19	19	20	21	19	High	High	High	High	High	High	High	High	High	High	54	133.241	179.52
High	Q9H4L4	Sentrin-specific protease 3 OS=Homo sapiens OX=9606 GN=SENP3 PE=1 SV=2	SENP3	ENSG00000161956.12	5	2	0.825055	0.0260575	231196	260886	247105	192089	304038	275682	267324	334869	205445	215542	214071	158799		124033	204319	267324	290994	221266	1	1	1	1		1	1	1	1	1	High	High	High	High	Not Found	Peak Found	High	Peak Found	Peak Found	Peak Found	5	7.867	0
High	P05166	Propionyl-CoA carboxylase beta chain, mitochondrial OS=Homo sapiens OX=9606 GN=PCCB PE=1 SV=3	PCCB	ENSG00000114054.13	16	5	1.17064	0.0262677	1.13955e+06	1.39065e+06	1.30588e+06	1.1855e+06	1.11562e+06	921764	1.10874e+06	1.01947e+06	1.01263e+06	1.14894e+06	1.13131e+06	980044		455124	683154	1.10874e+06	885899	368924	5	5	5	5		5	5	5	5	3	Peak Found	High	High	High	Not Found	Peak Found	High	High	High	Peak Found	15	17.828	2.1
High	Q0VGL1	Ragulator complex protein LAMTOR4 OS=Homo sapiens OX=9606 GN=LAMTOR4 PE=1 SV=1	LAMTOR4	ENSG00000188186.10	10	2	1.51498	0.0264357	801959	818604	818706	666802	661610	297779	624760	444936	712637	676325	709259	551240		269906	220695	624760	386639	393598	3	3	2	3		3	1	3	3	3	Peak Found	High	High	High	Not Found	Peak Found	Peak Found	High	Peak Found	High	55	14.791	1.68
High	Q00577	Transcriptional activator protein Pur-alpha OS=Homo sapiens OX=9606 GN=PURA PE=1 SV=2	PURA	ENSG00000185129.5	3	3	0.870103	0.0264809	458635	419994	443228	477874	545427	523094	513408	464198	407552	346996	383976	395055		222509	387685	513408	403378	191823	2	2	2	2		2	2	2	2	2	High	Peak Found	Peak Found	High	Not Found	Peak Found	Peak Found	High	Peak Found	Peak Found	19	13.695	2.49
High	Q9BQ61	Telomerase RNA component interacting RNase OS=Homo sapiens OX=9606 GN=TRIR PE=1 SV=1	C19orf43; TRIR	ENSG00000123144.10	18	2	0.600823	0.0264926	1.17268e+06	1.15619e+06	1.26948e+06	1.09779e+06	1.82443e+06	1.28781e+06	2.49207e+06	2.05172e+06	1.04207e+06	955239	1.09977e+06	907536	17792.3	744282	954445	2.49207e+06	1.7829e+06	154977	1	1	1	1	1	2	1	2	2	1	High	High	High	High	Peak Found	High	High	High	High	Peak Found	12	9.061	17.34
High	Q13287	N-myc-interactor OS=Homo sapiens OX=9606 GN=NMI PE=1 SV=2	NMI	ENSG00000123609.10	11	3	1.62189	0.0265263	870520	1.30232e+06	1.65536e+06	1.45135e+06	885627	875603	822219	595042	773562	1.07596e+06	1.43407e+06	1.19982e+06	18896.4	361295	648943	822219	517078	430569	2	3	3	3	1	3	2	2	2	2	High	High	High	High	Peak Found	High	High	High	Peak Found	Peak Found	9	7.992	0
High	Q6P1X6	UPF0598 protein C8orf82 OS=Homo sapiens OX=9606 GN=C8orf82 PE=1 SV=2	C8orf82	ENSG00000213563.6	11	2	1.68316	0.0266315	622001	815917	807205	607713	543539	571236	222121	305581	552723	674104	699295	502391		221739	423365	222121	265543	307693	2	2	2	2		2	2	1	1	2	High	High	High	High	Not Found	High	High	High	High	Peak Found	17	6.846	3.34
High	P19075	Tetraspanin-8 OS=Homo sapiens OX=9606 GN=TSPAN8 PE=1 SV=1	TSPAN8	ENSG00000127324.8	115	5	0.910097	0.02678	2.11216e+07	2.34798e+07	2.3013e+07	2.11134e+07	2.39375e+07	2.45569e+07	2.46297e+07	2.35014e+07	1.87691e+07	1.93989e+07	1.99365e+07	1.74543e+07	450468	9.76542e+06	1.82e+07	2.46297e+07	2.04222e+07	1.45176e+07	5	5	5	5	4	5	5	5	5	5	High	High	High	High	High	High	High	High	High	High	29	47.759	106.07
High	Q9NX14	NADH dehydrogenase [ubiquinone] 1 beta subcomplex subunit 11, mitochondrial OS=Homo sapiens OX=9606 GN=NDUFB11 PE=1 SV=1	NDUFB11	ENSG00000147123.10	23	2	1.14434	0.0268331	5.86552e+06	7.24406e+06	5.94102e+06	5.87148e+06	4.17021e+06	5.17524e+06	5.14727e+06	5.37831e+06	5.21222e+06	5.98499e+06	5.14681e+06	4.8539e+06	57140.1	1.70125e+06	3.83557e+06	5.14727e+06	4673633	3.52446e+06	2	2	2	2	1	2	2	2	2	2	High	High	High	High	Peak Found	High	High	High	High	High	22	15.226	29.09
High	Q15366	Poly(rC)-binding protein 2 OS=Homo sapiens OX=9606 GN=PCBP2 PE=1 SV=1	PCBP2	ENSG00000197111.15	348	8	0.873052	0.0269631	2.4934e+07	2.87519e+07	2.95554e+07	2.77057e+07	3.28759e+07	2.90427e+07	3.2668e+07	3.19989e+07	2.21568e+07	2.37546e+07	2.56043e+07	2.2904e+07	355200	1.34119e+07	2.15247e+07	3.2668e+07	2.78063e+07	1.66167e+07	8	8	10	9	4	9	9	10	8	11	High	High	High	High	High	High	High	High	High	High	67	106.543	272.11
High	Q6DKI1	60S ribosomal protein L7-like 1 OS=Homo sapiens OX=9606 GN=RPL7L1 PE=1 SV=2			4	2	0.581333	0.0270252	477670	472516	649128	562140	1.25153e+06	651663	852020	936645	424467	390389	562351	464717		510569	482973	852020	813924	394669	2	2	2	2		2	2	2	2	2	Peak Found	Peak Found	Peak Found	Peak Found	Not Found	High	Peak Found	High	High	Peak Found	13	5.49	0
High	Q15392	Delta(24)-sterol reductase OS=Homo sapiens OX=9606 GN=DHCR24 PE=1 SV=2	DHCR24	ENSG00000116133.11	84	10	1.22446	0.0271079	1.23967e+07	1.48206e+07	1.52713e+07	1.37244e+07	1.25446e+07	1.05775e+07	1.25565e+07	1.07677e+07	1.1016e+07	1.22447e+07	1.32298e+07	1.13458e+07	312737	5117605	7.83937e+06	1.25565e+07	9.3569e+06	6.62783e+06	10	10	10	11	6	10	10	10	10	8	High	High	High	High	Peak Found	High	High	High	High	High	30	56.065	78.46
High	P62906	60S ribosomal protein L10a OS=Homo sapiens OX=9606 GN=RPL10A PE=1 SV=2	RPL10A	ENSG00000198755.10	217	9	0.840749	0.0271624	7.24006e+07	7.83979e+07	7.91664e+07	7.5341e+07	7.75021e+07	9.41679e+07	8.86917e+07	9.47092e+07	6.43366e+07	6.47718e+07	6.85832e+07	6.22838e+07	2.64942e+06	3.16173e+07	6.97914e+07	8.86917e+07	8.23002e+07	5.4666e+07	10	10	10	10	9	10	10	10	10	10	High	High	High	High	Peak Found	High	High	High	High	High	44	58.597	231.02
High	O60256	Phosphoribosyl pyrophosphate synthase-associated protein 2 OS=Homo sapiens OX=9606 GN=PRPSAP2 PE=1 SV=1	PRPSAP2	ENSG00000141127.14	45	8	0.595911	0.0271771	2.81028e+06	4.76273e+06	2.4289e+06	2.98229e+06	6.1969e+06	4.50724e+06	4.97236e+06	4.74817e+06	2.49727e+06	3.93493e+06	2.1042e+06	2.46543e+06	259094	2.52805e+06	3.34049e+06	4.97236e+06	4.12605e+06	2.04348e+06	7	7	6	7	4	8	8	8	7	7	High	High	High	High	Peak Found	High	High	High	High	High	38	27.772	32.51
High	P61923	Coatomer subunit zeta-1 OS=Homo sapiens OX=9606 GN=COPZ1 PE=1 SV=1	COPZ1	ENSG00000111481.9	67	6	1.12007	0.0273017	7.03407e+06	7.80207e+06	8.23388e+06	7.14869e+06	6.76495e+06	6.14498e+06	6.91657e+06	6.58313e+06	6.25062e+06	6.44601e+06	7.13316e+06	5.90977e+06	79578.2	2.75979e+06	4.55428e+06	6.91657e+06	5.7206e+06	3.32782e+06	6	6	6	6	2	5	5	6	5	6	High	High	High	High	Peak Found	High	High	High	High	High	53	48.66	62.72
High	Q5TZA2	Rootletin OS=Homo sapiens OX=9606 GN=CROCC PE=1 SV=1	CROCC		36	3	1.2049	0.0273329	2.74759e+06	3.07819e+06	2.99718e+06	3.08246e+06	2.08809e+06	2.44021e+06	2.60202e+06	2.80105e+06	2.44156e+06	2.54318e+06	2.59651e+06	2.54825e+06	18979.2	851844	1.80854e+06	2.60202e+06	2.43405e+06	1.62387e+06	3	3	3	3	1	3	3	3	3	3	High	High	High	High	Peak Found	High	High	High	High	High	2	10.866	33.12
High	O43837	Isocitrate dehydrogenase [NAD] subunit beta, mitochondrial OS=Homo sapiens OX=9606 GN=IDH3B PE=1 SV=2	IDH3B	ENSG00000101365.20	36	5	1.20997	0.0273788	5.07267e+06	5.61924e+06	5.94176e+06	5.50632e+06	4.61663e+06	4.57826e+06	5.34682e+06	4.5583e+06	4.50767e+06	4.64258e+06	5.14745e+06	4.55203e+06	85120	1.88338e+06	3.39312e+06	5.34682e+06	3.96106e+06	2.48204e+06	5	5	5	5	3	5	5	5	5	5	High	High	High	High	Peak Found	High	High	High	High	High	16	26.913	14.05
High	Q13564	NEDD8-activating enzyme E1 regulatory subunit OS=Homo sapiens OX=9606 GN=NAE1 PE=1 SV=1	NAE1	ENSG00000159593.14	48	11	1.1865	0.0274853	5.47984e+06	6.37558e+06	5.43139e+06	5.81163e+06	3.49579e+06	4.60373e+06	4.91285e+06	5.15304e+06	4.86949e+06	5.26746e+06	4.70531e+06	4.80443e+06	49837.8	1.42612e+06	3.412e+06	4.91285e+06	4.47788e+06	2.6882e+06	10	10	9	10	3	8	9	10	10	10	High	High	High	High	Peak Found	High	High	High	High	High	29	41.397	33.58
High	P28062	Proteasome subunit beta type-8 OS=Homo sapiens OX=9606 GN=PSMB8 PE=1 SV=3	PSMB8	ENSG00000235715.6; ENSG00000231631.6; ENSG00000236443.6; ENSG00000206298.8; ENSG00000226201.6; ENSG00000230669.6; ENSG00000204264.8	32	6	1.15559	0.027569	3.44569e+06	4.13494e+06	3.72114e+06	3.82492e+06	3.13987e+06	3.53442e+06	3.21601e+06	3.31402e+06	3.06191e+06	3.41626e+06	3.22369e+06	3.16203e+06	141179	1.28092e+06	2.61949e+06	3.21601e+06	2.87981e+06	2.02398e+06	5	5	5	5	4	5	5	5	5	5	High	High	High	High	Peak Found	High	Peak Found	High	High	High	24	20.248	25.86
High	Q8WXA9	Splicing regulatory glutamine/lysine-rich protein 1 OS=Homo sapiens OX=9606 GN=SREK1 PE=1 SV=1	SREK1	ENSG00000153914.15	4	3	1.38721	0.0275774	910385	1.02975e+06	1.05006e+06	737200	769023	742302	547683	656293	808986	850775	909687	609438	68615.6	313726	550149	547683	570304	430216	3	3	3	2	1	2	2	2	2	2	Peak Found	High	Peak Found	Peak Found	Peak Found	Peak Found	Peak Found	High	Peak Found	Peak Found	10	7.975	0
High	Q8TEQ6	Gem-associated protein 5 OS=Homo sapiens OX=9606 GN=GEMIN5 PE=1 SV=3	GEMIN5	ENSG00000082516.8	75	18	0.86753	0.027853	6.40015e+06	6.36358e+06	7.02591e+06	6.93903e+06	7.44673e+06	6.94189e+06	7.92932e+06	8.21401e+06	5.6873e+06	5.25754e+06	6.08667e+06	5.73645e+06	52307.4	3.03792e+06	5.1449e+06	7.92932e+06	7.13779e+06	4.99302e+06	15	15	16	14	3	16	15	16	16	16	High	High	High	High	Peak Found	High	High	High	High	High	19	74.578	21.29
High	P04114	Apolipoprotein B-100 OS=Homo sapiens OX=9606 GN=APOB PE=1 SV=2	APOB		43	12	1.55132	0.027879	8.03162e+06	1.1536e+07	1.25583e+07	8.00551e+06	5.56533e+06	7.37234e+06	7.04814e+06	4.68169e+06	7.13705e+06	9.53092e+06	1.08795e+07	6.61809e+06	167757	2.2704e+06	5.46392e+06	7.04814e+06	4.06829e+06	3.37066e+06	10	11	11	10	8	10	11	10	8	10	High	High	High	High	Peak Found	Peak Found	High	High	High	High	3	42.617	23.68
High	P62269	40S ribosomal protein S18 OS=Homo sapiens OX=9606 GN=RPS18 PE=1 SV=3	RPS18	ENSG00000223367.6; ENSG00000096150.9; ENSG00000235650.6; ENSG00000226225.6; ENSG00000231500.6	256	9	0.838652	0.0280422	7.92615e+07	9.10785e+07	8.44069e+07	8.87458e+07	8.78333e+07	1.07938e+08	1.03376e+08	1.03089e+08	7.04334e+07	7.52484e+07	7.31232e+07	7.33654e+07	3.06918e+06	3.5832e+07	7.99968e+07	1.03376e+08	8.95823e+07	5.94475e+07	11	11	11	11	11	11	11	11	11	11	High	High	High	High	High	High	High	High	High	High	44	44.29	231.8
High	Q9NV92	NEDD4 family-interacting protein 2 OS=Homo sapiens OX=9606 GN=NDFIP2 PE=1 SV=2	NDFIP2	ENSG00000102471.13	12	2	1.35497	0.0280542	720839	954075	1.00107e+06	884310	428381	719731	712273	644500	640552	788249	867241	731052	18489.8	174760	533420	712273	560057	469313	1	1	2	2	1	1	1	1	1	2	High	High	High	High	Peak Found	High	High	High	High	High	10	8.347	6.44
High	P32322	Pyrroline-5-carboxylate reductase 1, mitochondrial OS=Homo sapiens OX=9606 GN=PYCR1 PE=1 SV=2	PYCR1	ENSG00000183010.16	60	7	0.75157	0.0283269	1.16987e+07	1.01766e+07	1.08807e+07	1.13742e+07	1.11141e+07	1.56264e+07	1.48994e+07	1.47118e+07	1.03957e+07	8.40784e+06	9.42614e+06	9.40295e+06	259079	4.53404e+06	1.15813e+07	1.48994e+07	1.27842e+07	7.59475e+06	7	7	7	7	5	7	7	7	7	7	High	High	High	High	Peak Found	High	High	High	High	High	39	43.489	83.69
High	Q9Y696	Chloride intracellular channel protein 4 OS=Homo sapiens OX=9606 GN=CLIC4 PE=1 SV=4	CLIC4	ENSG00000169504.14	44	9	0.677316	0.0284004	2.56852e+06	3.59593e+06	4.49154e+06	4.66984e+06	7.03828e+06	5.97336e+06	4.5004e+06	5.9671e+06	2.28244e+06	2.97093e+06	3.8911e+06	3.86052e+06	19998.8	2.87129e+06	4.42708e+06	4.5004e+06	5.18528e+06	3.65574e+06	6	7	8	7	1	8	8	6	8	8	High	High	High	High	Peak Found	High	High	High	High	High	48	31.889	16.25
High	O95456	Proteasome assembly chaperone 1 OS=Homo sapiens OX=9606 GN=PSMG1 PE=1 SV=1	PSMG1	ENSG00000183527.11	29	5	0.788536	0.028422	2.67508e+06	2.51394e+06	2.65559e+06	2.24912e+06	4.42466e+06	2.97246e+06	3.21145e+06	3.34441e+06	2.37713e+06	2.077e+06	2.30058e+06	1.85933e+06	57877.2	1.80506e+06	2.203e+06	3.21145e+06	2.90622e+06	1.97332e+06	5	4	5	4	3	5	5	5	5	5	High	High	High	High	Peak Found	High	High	High	High	High	28	16.363	10.94
High	P37837	Transaldolase OS=Homo sapiens OX=9606 GN=TALDO1 PE=1 SV=2	TALDO1	ENSG00000177156.10	339	13	0.869959	0.0284835	8.13333e+07	9.55415e+07	9.04564e+07	9.03131e+07	9.26365e+07	1.06106e+08	1.02911e+08	1.0488e+08	7.22744e+07	7.89356e+07	7.83639e+07	7.46611e+07	1.85581e+06	3.77914e+07	7.86391e+07	1.02911e+08	9.11387e+07	5.77717e+07	16	17	16	16	13	17	17	17	17	17	High	High	High	High	High	High	High	High	High	High	39	65.938	400.86
High	Q15043	Metal cation symporter ZIP14 OS=Homo sapiens OX=9606 GN=SLC39A14 PE=1 SV=3	SLC39A14	ENSG00000104635.13	16	3	0.769529	0.0285825	1.73618e+06	2.01656e+06	1.68202e+06	1.05745e+06	2.33529e+06	2.11446e+06	2.29289e+06	2.14905e+06	1.5428e+06	1.66607e+06	1.45716e+06	874190		952690	1.56711e+06	2.29289e+06	1867476	1.14977e+06	3	3	2	2		3	3	3	3	3	High	High	Peak Found	Peak Found	Not Found	High	High	High	High	High	9	12.389	0
High	Q9NS86	LanC-like protein 2 OS=Homo sapiens OX=9606 GN=LANCL2 PE=1 SV=1	LANCL2	ENSG00000132434.9	13	4	1.219	0.0285825	1.53844e+06	1.69661e+06	1.68252e+06	1.61709e+06	1.24665e+06	1.46974e+06	1.46018e+06	984148	1.36709e+06	1.40173e+06	1.4576e+06	1.33684e+06		508575	1.08928e+06	1.46018e+06	855203	643939	3	3	3	3		3	3	3	2	2	High	High	High	High	Not Found	Peak Found	High	High	High	High	20	12.114	4.03
High	P62910	60S ribosomal protein L32 OS=Homo sapiens OX=9606 GN=RPL32 PE=1 SV=2	RPL32	ENSG00000144713.12	43	2	0.731204	0.0286641	1.63983e+07	1.66522e+07	1.89679e+07	1.75171e+07	1.75639e+07	2.4714e+07	2.36182e+07	2.3112e+07	1.45719e+07	1.37579e+07	1.64322e+07	14481280	228290	7.16528e+06	1.83165e+07	2.36182e+07	2.00838e+07	6.28182e+06	3	3	3	2	2	3	3	3	3	3	High	High	High	High	Peak Found	High	High	High	High	High	20	26.242	61.09
High	Q9NVT9	Armadillo repeat-containing protein 1 OS=Homo sapiens OX=9606 GN=ARMC1 PE=1 SV=1	ARMC1	ENSG00000104442.9	6	2	0.816119	0.0288416	717868	668296	653158	629688	791072	828121	868138	683302	637912	552141	565842	520558		322721	613752	868138	593774	392576	2	2	2	2		2	2	2	2	2	Peak Found	High	High	High	Not Found	Peak Found	Peak Found	High	High	High	11	5.029	0
High	O14745	Na(+)/H(+) exchange regulatory cofactor NHE-RF1 OS=Homo sapiens OX=9606 GN=SLC9A3R1 PE=1 SV=4	SLC9A3R1	ENSG00000109062.11	36	8	0.668185	0.0291372	2.46726e+06	2.11056e+06	3.35812e+06	2.41098e+06	3.96063e+06	3.20785e+06	4.5988e+06	3.34011e+06	2.19246e+06	1.74373e+06	2.9092e+06	1.99314e+06		1.61575e+06	2.37746e+06	4.5988e+06	2.90248e+06	918697	6	5	6	5		6	5	6	6	5	High	High	High	High	Not Found	High	High	High	High	High	35	30.905	30.38
High	P45973	Chromobox protein homolog 5 OS=Homo sapiens OX=9606 GN=CBX5 PE=1 SV=1	CBX5	ENSG00000094916.15	14	3	1.42349	0.0292409	2.24786e+06	2.42924e+06	3.03157e+06	2.63077e+06	1.59224e+06	1.31563e+06	2.32168e+06	1.96243e+06	1.99749e+06	2.00702e+06	2.6263e+06	2174841		649559	975066	2.32168e+06	1.7053e+06	186786	3	3	3	3		3	2	3	3	1	Peak Found	High	High	High	Not Found	High	Peak Found	High	High	Peak Found	25	12.722	12.4
High	Q99447	Ethanolamine-phosphate cytidylyltransferase OS=Homo sapiens OX=9606 GN=PCYT2 PE=1 SV=1	PCYT2	ENSG00000185813.10	127	15	0.896907	0.0292612	1.39275e+07	1.61978e+07	1.55999e+07	1.4656e+07	1.59948e+07	1.6707e+07	1.78289e+07	1.70267e+07	1.23763e+07	1.33825e+07	1.35145e+07	1.2116e+07	273881	6.52514e+06	1.23822e+07	1.78289e+07	1.47958e+07	7.66495e+06	15	15	15	15	8	15	15	15	15	14	High	High	High	High	Peak Found	High	High	High	High	High	55	85.765	127.62
High	P46783	40S ribosomal protein S10 OS=Homo sapiens OX=9606 GN=RPS10 PE=1 SV=1	RPS10	ENSG00000124614.13	227	7	0.825512	0.0294102	2.99783e+07	3.33649e+07	3.47215e+07	3.37343e+07	5.03045e+07	3.8761e+07	3.65358e+07	4.25209e+07	2.66394e+07	2.75659e+07	3.00799e+07	2.78879e+07	1.42126e+06	2.05219e+07	2.87273e+07	3.65358e+07	3.69497e+07	2.48532e+07	9	9	9	9	6	9	9	9	9	9	High	High	High	High	High	High	High	High	High	High	47	43.472	292.79
High	P04632	Calpain small subunit 1 OS=Homo sapiens OX=9606 GN=CAPNS1 PE=1 SV=1	CAPNS1	ENSG00000126247.10	96	7	1.26721	0.0294409	8.45892e+06	1.03423e+07	1.00002e+07	9.4424e+06	7.72324e+06	7.34821e+06	9.09593e+06	7.6196e+06	7.51677e+06	8.54476e+06	8.66333e+06	7.80596e+06	176057	3.15073e+06	5.44604e+06	9.09593e+06	6.62127e+06	3.74841e+06	7	7	7	7	2	7	7	7	7	7	High	High	High	High	Peak Found	High	High	High	High	High	56	42.941	70.19
High	Q9BV38	WD repeat-containing protein 18 OS=Homo sapiens OX=9606 GN=WDR18 PE=1 SV=2	WDR18	ENSG00000065268.10	20	2	0.724743	0.0295161	995702	1.07775e+06	984187	1.16198e+06	1.07371e+06	1.52125e+06	1.4733e+06	1.38766e+06	884800	890432	852618	960601	18801.3	438026	1.12746e+06	1.4733e+06	1.20584e+06	817890	2	2	2	2	1	2	2	2	2	2	High	High	High	High	Peak Found	High	High	High	High	High	6	6.499	19.81
High	O15446	DNA-directed RNA polymerase I subunit RPA34 OS=Homo sapiens OX=9606 GN=CD3EAP PE=1 SV=1	CD3EAP	ENSG00000117877.10	19	3	0.801296	0.0296559	1.14534e+06	1.33257e+06	1.04888e+06	1.24623e+06	1.2564e+06	1.49204e+06	1.55668e+06	1.49259e+06	1.01777e+06	1.10096e+06	908667	1.03025e+06		512555	1.10581e+06	1.55668e+06	1.29703e+06		3	3	3	3		3	3	3	3		High	High	High	High	Not Found	High	High	High	High	Not Found	11	14.585	3.4
High	P08574	Cytochrome c1, heme protein, mitochondrial OS=Homo sapiens OX=9606 GN=CYC1 PE=1 SV=3	CYC1	ENSG00000179091.4	58	6	1.29357	0.0297128	8.11893e+06	9.86994e+06	9.46882e+06	9.85795e+06	8.62781e+06	6.1324e+06	7.13253e+06	7.80813e+06	7.21464e+06	8.15447e+06	8.20301e+06	8.14949e+06	182068	3.51975e+06	4.54495e+06	7.13253e+06	6.78509e+06	4.68129e+06	6	6	6	6	3	6	5	6	6	6	High	High	High	High	Peak Found	High	High	High	High	High	39	35.767	43.18
High	P35626	Beta-adrenergic receptor kinase 2 OS=Homo sapiens OX=9606 GN=GRK3 PE=1 SV=2	ADRBK2; GRK3	ENSG00000100077.14	2	2	0.784871	0.0298645	243277	293745	318779	270181	354258	298708	364236	379877	216181	242690	276163	223356		144521	221384	364236	330105	257544	1	1	1	1		1	1	1	1	1	Peak Found	High	Peak Found	Peak Found	Not Found	Peak Found	Peak Found	Peak Found	Peak Found	High	4	3.934	0
High	P04899	Guanine nucleotide-binding protein G(i) subunit alpha-2 OS=Homo sapiens OX=9606 GN=GNAI2 PE=1 SV=3	GNAI2	ENSG00000114353.16	73	6	0.870104	0.0298873	2.20967e+06	2.45091e+06	2.23638e+06	2.15418e+06	2.83776e+06	2.41728e+06	2.64718e+06	2.46261e+06	1.96356e+06	2.02492e+06	1.93742e+06	1.78085e+06		1.15768e+06	1.79154e+06	2.64718e+06	2.13996e+06	1.44862e+06	5	5	5	5		5	5	5	5	5	High	High	High	High	Not Found	High	High	High	High	High	42	45.543	34.5
High	P53365	Arfaptin-2 OS=Homo sapiens OX=9606 GN=ARFIP2 PE=1 SV=1	ARFIP2	ENSG00000132254.12	20	4	0.892218	0.0299429	1.13905e+06	1.37416e+06	1.3308e+06	1.22501e+06	1.40058e+06	1.50556e+06	1.46399e+06	1.38109e+06	1.01218e+06	1.13532e+06	1.1529e+06	1.01271e+06		571371	1.11583e+06	1.46399e+06	1.20013e+06	755331	4	4	4	4		4	4	4	4	4	High	High	High	High	Not Found	High	High	High	High	High	18	17.866	8.02
High	P05387	60S acidic ribosomal protein P2 OS=Homo sapiens OX=9606 GN=RPLP2 PE=1 SV=1	RPLP2	ENSG00000177600.8	67	6	0.744589	0.0300409	9.54799e+06	1.22272e+07	1.40182e+07	1.1559e+07	1.66314e+07	1.53141e+07	1.66611e+07	1.30061e+07	8.48454e+06	1.0102e+07	1.21442e+07	9.55574e+06	840225	6.78485e+06	1.13498e+07	1.66611e+07	1.1302e+07	1.625e+07	6	5	6	6	5	6	6	6	6	6	High	High	High	High	Peak Found	High	High	High	High	High	77	40.119	85.73
High	P30626	Sorcin OS=Homo sapiens OX=9606 GN=SRI PE=1 SV=1	SRI	ENSG00000075142.13	20	3	0.832093	0.0301572	2.25206e+06	2.06541e+06	2.29669e+06	2.52884e+06	2.39373e+06	2.67723e+06	2.82615e+06	2.7894e+06	2.00122e+06	1.70642e+06	1.98966e+06	2.09057e+06	98070.2	976533	1.98419e+06	2.82615e+06	2.42393e+06	4.06987e+06	3	3	3	3	2	3	3	3	3	3	Peak Found	High	High	High	Peak Found	High	High	High	High	High	17	12.968	5.22
High	P57740	Nuclear pore complex protein Nup107 OS=Homo sapiens OX=9606 GN=NUP107 PE=1 SV=1	NUP107	ENSG00000111581.9	53	11	0.71545	0.0302376	3.57489e+06	4.40437e+06	3.489e+06	4.21433e+06	7.27322e+06	4.82262e+06	4.74595e+06	6.06454e+06	3.17672e+06	3.63886e+06	3.02258e+06	3.48395e+06	16475.7	2.96714e+06	3.57423e+06	4.74595e+06	5.26995e+06	3.02895e+06	10	11	10	11	1	11	12	11	12	11	High	High	High	High	Peak Found	High	High	High	High	High	19	50.509	18.47
High	O14949	Cytochrome b-c1 complex subunit 8 OS=Homo sapiens OX=9606 GN=UQCRQ PE=1 SV=4	UQCRQ	ENSG00000164405.10	83	4	1.22919	0.0303551	4.99059e+06	6.1427e+06	5.81575e+06	6.34065e+06	4.09476e+06	5.16024e+06	4.68854e+06	5.04018e+06	4.43474e+06	5.07505e+06	5.03828e+06	5.24176e+06	146622	1.67047e+06	3.82445e+06	4.68854e+06	4.37981e+06	2.94676e+06	4	4	4	4	3	4	4	4	4	4	High	High	High	High	Peak Found	High	High	High	High	High	45	11.481	31.28
High	P08559	Pyruvate dehydrogenase E1 component subunit alpha, somatic form, mitochondrial OS=Homo sapiens OX=9606 GN=PDHA1 PE=1 SV=3	PDHA1	ENSG00000131828.13	125	12	1.81553	0.0303959	7.26907e+07	3.56851e+07	3.70715e+07	5.7026e+07	2.63524e+07	2.54767e+07	24098594	2.68001e+07	6.45944e+07	2.94828e+07	3.21157e+07	4.71429e+07	2.94816e+06	1.07506e+07	1.88818e+07	24098594	2.32887e+07	1.31869e+07	13	14	14	14	7	14	14	14	14	14	High	High	High	High	High	High	High	High	High	High	46	74.456	107.13
High	P43490	Nicotinamide phosphoribosyltransferase OS=Homo sapiens OX=9606 GN=NAMPT PE=1 SV=1	NAMPT	ENSG00000105835.11	131	18	0.878614	0.030402	1.96601e+07	2.0016e+07	2.08613e+07	2.15504e+07	2.56014e+07	2.17293e+07	2.19894e+07	2.45353e+07	1.74704e+07	1.65371e+07	1.80725e+07	1.78155e+07	528267	1.04442e+07	1.61044e+07	2.19894e+07	2.13206e+07	1.27092e+07	17	16	16	17	12	16	17	17	18	17	High	High	High	High	Peak Found	High	High	High	High	High	53	99.717	148.19
High	Q9H479	Fructosamine-3-kinase OS=Homo sapiens OX=9606 GN=FN3K PE=1 SV=1	FN3K	ENSG00000167363.13	28	4	1.22122	0.0304913	2.68254e+06	3.28208e+06	2.84189e+06	2.89649e+06	1.73698e+06	2.22161e+06	2.47729e+06	2.63365e+06	2.38376e+06	2.71163e+06	2.46198e+06	2.3945e+06	51974.8	708606	1.64652e+06	2.47729e+06	2.28859e+06	1.40539e+06	4	4	4	4	2	4	4	4	4	4	High	High	High	High	Peak Found	High	High	High	High	High	17	15.501	5.14
High	Q6NUK1	Calcium-binding mitochondrial carrier protein SCaMC-1 OS=Homo sapiens OX=9606 GN=SLC25A24 PE=1 SV=2	SLC25A24	ENSG00000085491.15; ENSG00000284468.1	77	12	0.906423	0.0305144	9.69432e+06	1.11819e+07	1.08181e+07	1.03295e+07	1.21794e+07	1.19419e+07	1.10953e+07	1.1389e+07	8.61456e+06	9.23838e+06	9.37194e+06	8.53931e+06	178213	4.96864e+06	8.85059e+06	1.10953e+07	9896777	6.42276e+06	11	11	11	11	5	11	11	11	11	11	High	High	High	High	Peak Found	High	High	High	High	High	35	59.269	59.44
High	Q96BK5	PIN2/TERF1-interacting telomerase inhibitor 1 OS=Homo sapiens OX=9606 GN=PINX1 PE=1 SV=2	PINX1	ENSG00000254093.8	2	2	0.590558	0.0306513	311141	634166	474587	434878	847682	1.08127e+06	692328	613788	276486	523943	411143	359510		345815	801372	692328	533368		1	2	2	2		2	2	2	2		Peak Found	Peak Found	Peak Found	Peak Found	Not Found	Peak Found	High	High	Peak Found	Not Found	9	5.269	0
High	P49642	DNA primase small subunit OS=Homo sapiens OX=9606 GN=PRIM1 PE=1 SV=1	PRIM1	ENSG00000198056.13	6	2	0.32608	0.0306715	862830	717057	816323	554451	4.41694e+06	1.275e+06	2.44782e+06	2.25465e+06	766728	592427	707195	458360		1.80191e+06	944954	2.44782e+06	1.95924e+06	1.25228e+06	2	1	2	1		2	2	2	2	2	Peak Found	High	High	High	Not Found	High	Peak Found	Peak Found	High	High	7	5.927	1.6
High	Q6P2E9	Enhancer of mRNA-decapping protein 4 OS=Homo sapiens OX=9606 GN=EDC4 PE=1 SV=1	EDC4	ENSG00000038358.14	24	7	0.83787	0.0307197	1.52059e+06	1.35842e+06	1.34155e+06	1.39857e+06	1.45868e+06	1.59825e+06	1.69224e+06	1.7972e+06	1.35123e+06	1.12232e+06	1.16221e+06	1.15619e+06	15439.2	595076	1.18452e+06	1.69224e+06	1.56173e+06	731738	5	4	4	4	1	4	4	5	5	4	High	High	High	High	Peak Found	High	High	High	High	High	8	22.533	6.46
High	P31947	14-3-3 protein sigma OS=Homo sapiens OX=9606 GN=SFN PE=1 SV=1	SFN	ENSG00000175793.11	587	5	0.706184	0.0307423	7.98959e+06	8.09228e+06	9.61985e+06	8.94513e+06	1.67419e+07	1.19449e+07	1.21811e+07	1.01489e+07	7.09971e+06	6.68578e+06	8.33385e+06	7.39487e+06	154970	6.82992e+06	8.85284e+06	1.21811e+07	8.81916e+06	7.2397e+06	5	5	5	5	3	5	5	5	5	5	High	High	High	High	Peak Found	High	High	High	High	High	42	59.66	571.15
High	Q969Q0	60S ribosomal protein L36a-like OS=Homo sapiens OX=9606 GN=RPL36AL PE=1 SV=3	RPL36AL	ENSG00000165502.6	69	3	0.917719	0.0307871	1.91318e+07	2.16873e+07	2.15128e+07	2.1547e+07	2.28055e+07	2.67327e+07	2.4115e+07	2.27586e+07	1.70009e+07	1.79179e+07	1.86369e+07	1.78128e+07	150426	9.30362e+06	1.98126e+07	2.4115e+07	1.97767e+07	5.90453e+06	3	3	3	3	2	3	3	3	3	3	High	High	High	High	Peak Found	High	High	High	High	High	24	8.505	65.61
High	P53701	Cytochrome c-type heme lyase OS=Homo sapiens OX=9606 GN=HCCS PE=1 SV=1	HCCS	ENSG00000004961.14	29	5	1.10526	0.0309307	7.30399e+06	8.49099e+06	7.40856e+06	7.48724e+06	6.91959e+06	6.55347e+06	7.15572e+06	6.55765e+06	6.49047e+06	7.01519e+06	6418165	6.18964e+06	119896	2.82288e+06	4.85703e+06	7.15572e+06	5.69846e+06	3.89448e+06	5	5	4	6	2	5	5	5	5	6	High	High	High	High	Peak Found	High	High	High	High	High	29	20.507	15.61
High	P62979	Ubiquitin-40S ribosomal protein S27a OS=Homo sapiens OX=9606 GN=RPS27A PE=1 SV=2	RPS27A	ENSG00000143947.13	528	2	0.775955	0.0311013	1.25848e+07	1.25923e+07	1.01328e+07	1.27852e+07	1.24246e+07	1.59736e+07	1.6473e+07	1.75769e+07	1.11831e+07	1.04036e+07	8.7782e+06	1.05695e+07	75165.6	5.06868e+06	1.18387e+07	1.6473e+07	1.52739e+07	3.36723e+06	4	4	4	4	2	4	4	4	4	4	High	High	High	High	Peak Found	High	High	High	High	High	56	59.886	419.49
High	Q7KZF4	Staphylococcal nuclease domain-containing protein 1 OS=Homo sapiens OX=9606 GN=SND1 PE=1 SV=1	SND1	ENSG00000197157.10	478	38	0.9051	0.0311208	8.82019e+07	9.87571e+07	9.56193e+07	9.43214e+07	9.65515e+07	1.04361e+08	1.05495e+08	1.09073e+08	7.8378e+07	8.15923e+07	8.28367e+07	7.79748e+07	2.02704e+06	3.93886e+07	7.73459e+07	1.05495e+08	9.47823e+07	5.83994e+07	38	39	39	39	25	38	37	39	38	38	High	High	High	High	Peak Found	High	High	High	High	High	57	240.532	468.01
High	P18621	60S ribosomal protein L17 OS=Homo sapiens OX=9606 GN=RPL17 PE=1 SV=3	RPL17	ENSG00000215472.10; ENSG00000265681.7	186	7	0.820024	0.0311923	5.26082e+07	5.90405e+07	6.02476e+07	5.79201e+07	5.80122e+07	7.39607e+07	7.02219e+07	7.24087e+07	4.67487e+07	4.87788e+07	5.21936e+07	4.78821e+07	963742	2.36663e+07	5.48151e+07	7.02219e+07	6.29216e+07	1.92046e+07	8	8	8	7	5	7	7	8	8	7	High	High	High	High	Peak Found	High	High	High	High	High	46	56.784	253.26
High	Q53H12	Acylglycerol kinase, mitochondrial OS=Homo sapiens OX=9606 GN=AGK PE=1 SV=2	AGK	ENSG00000006530.15	40	6	1.20932	0.0312169	4.84106e+06	4.64527e+06	4.83975e+06	4.72549e+06	4.60993e+06	3.84331e+06	4.06626e+06	3.18253e+06	4.30186e+06	3.83788e+06	4.19276e+06	3.90653e+06	79438.3	1.88064e+06	2.84842e+06	4.06626e+06	2.76555e+06	2.53315e+06	6	6	6	6	3	6	6	6	5	6	High	High	High	High	Peak Found	High	High	High	High	High	21	31.872	33.69
High	Q9HAV4	Exportin-5 OS=Homo sapiens OX=9606 GN=XPO5 PE=1 SV=1	XPO5	ENSG00000124571.17	45	9	0.759603	0.0312794	2.01432e+06	3.00644e+06	2.22597e+06	2.85744e+06	4.38836e+06	3.20722e+06	3.17817e+06	3.48498e+06	1.78996e+06	2.4839e+06	1.9284e+06	2362225		1.79025e+06	2.37699e+06	3.17817e+06	3.02837e+06	2.10729e+06	7	7	6	7		7	8	8	8	8	High	High	High	High	Not Found	High	High	High	High	High	11	43.148	19.25
High	Q9UGI8	Testin OS=Homo sapiens OX=9606 GN=TES PE=1 SV=1	TES	ENSG00000135269.17	36	9	0.798893	0.0313826	4.44442e+06	5.63506e+06	4.7407e+06	4.89128e+06	5.39185e+06	5.89663e+06	7.0324e+06	6.16003e+06	3.9494e+06	4.65564e+06	4.10695e+06	4.04358e+06	57617.4	2.19963e+06	4.37022e+06	7.0324e+06	5.35293e+06	2.37266e+06	7	8	7	7	3	9	8	9	8	7	High	High	High	High	Peak Found	High	High	High	High	High	32	26.721	22.3
High	Q13740	CD166 antigen OS=Homo sapiens OX=9606 GN=ALCAM PE=1 SV=2	ALCAM	ENSG00000170017.12	114	10	1.12512	0.0313852	1.04571e+07	1.20323e+07	1.15221e+07	1.19886e+07	1.03671e+07	9.79442e+06	1.06789e+07	1.0529e+07	9.29235e+06	9.94103e+06	9.98183e+06	9.91088e+06	140030	4229315	7.25902e+06	1.06789e+07	9.14948e+06	6.56713e+06	10	11	12	11	4	10	11	12	11	12	High	High	High	High	Peak Found	High	High	High	High	High	29	53.458	61.85
High	P20340	Ras-related protein Rab-6A OS=Homo sapiens OX=9606 GN=RAB6A PE=1 SV=3	RAB6A	ENSG00000175582.19	73	6	0.910012	0.031499	4.12381e+06	4.64246e+06	4.62948e+06	4.69097e+06	4.76979e+06	4.92415e+06	5.50606e+06	5.26467e+06	3664497	3.83557e+06	4.0106e+06	3.87799e+06	46273.2	1.94585e+06	3.64947e+06	5.50606e+06	4.57488e+06	2.79054e+06	6	6	6	6	2	6	6	6	6	5	High	High	High	High	Peak Found	High	High	High	High	High	43	26.911	58.25
High	Q14974	Importin subunit beta-1 OS=Homo sapiens OX=9606 GN=KPNB1 PE=1 SV=2	KPNB1	ENSG00000108424.9	303	28	0.893185	0.0315727	4.73612e+07	5.61431e+07	5.37689e+07	5.28367e+07	6.28979e+07	5.51821e+07	5.92533e+07	6.01011e+07	4.20861e+07	4.6385e+07	4.6581e+07	4.36797e+07	519846	2.56594e+07	4.08976e+07	5.92533e+07	5.22266e+07	3.01032e+07	29	30	28	29	9	29	27	29	30	30	High	High	High	High	Peak Found	High	High	High	High	High	52	217.504	309.93
High	Q9HCS7	Pre-mRNA-splicing factor SYF1 OS=Homo sapiens OX=9606 GN=XAB2 PE=1 SV=2	XAB2	ENSG00000076924.11	6	4	0.739511	0.0316623	365959	390977	394978	524533	559200	510718	552085	491913	325198	323022	342176	433627		228128	378513	552085	427462	302483	2	2	2	2		2	2	2	2	2	Peak Found	Peak Found	Peak Found	Peak Found	Not Found	Peak Found	High	High	High	High	6	12.488	0
High	Q9Y5Q9	General transcription factor 3C polypeptide 3 OS=Homo sapiens OX=9606 GN=GTF3C3 PE=1 SV=1	GTF3C3	ENSG00000119041.10	3	2	0.736938	0.0318407	267333		212638	262691	442859	301809	330034	382890	237557		184212	217164		180666	223682	330034	332723	189815	1		1	1		1	1	1	1	1	Peak Found	Not Found	Peak Found	Peak Found	Not Found	High	Peak Found	Peak Found	High	Peak Found	2	4.21	0
High	P49589	Cysteine--tRNA ligase, cytoplasmic OS=Homo sapiens OX=9606 GN=CARS1 PE=1 SV=3	CARS	ENSG00000278191.4; ENSG00000110619.17	75	10	0.733216	0.0320211	6.30068e+06	7.59761e+06	5.81407e+06	5.56704e+06	8.11002e+06	8.41274e+06	8.43257e+06	6.85103e+06	5.59891e+06	6.27709e+06	5.03683e+06	4.60223e+06	61824.7	3.30851e+06	6.235e+06	8.43257e+06	5.95339e+06	5.05683e+06	10	10	9	9	2	10	10	10	9	10	High	High	High	High	Peak Found	High	High	High	High	High	18	48.9	64.25
High	O75935	Dynactin subunit 3 OS=Homo sapiens OX=9606 GN=DCTN3 PE=1 SV=1	DCTN3	ENSG00000137100.15	5	2	0.649919	0.0321386	651851	798052	806867	651186	813270	991185	1.41275e+06	1.23971e+06	579248	659345	699003	538331	17394.2	331777	734605	1.41275e+06	1.07728e+06	729931	2	2	2	2	1	2	2	2	2	2	High	Peak Found	Peak Found	Peak Found	Peak Found	Peak Found	Peak Found	High	High	High	16	8.477	2.28
High	O43390	Heterogeneous nuclear ribonucleoprotein R OS=Homo sapiens OX=9606 GN=HNRNPR PE=1 SV=1	HNRNPR	ENSG00000282958.1; ENSG00000125944.18	434	17	0.901755	0.0324894	5.16922e+07	5.84469e+07	5.79965e+07	5.88661e+07	5.84487e+07	6.62531e+07	6.40203e+07	6.51094e+07	4.59347e+07	4.82884e+07	5.02434e+07	4.86641e+07	1.37476e+06	2.38444e+07	4.91027e+07	6.40203e+07	5.65787e+07	3.14999e+07	18	18	18	18	12	18	18	18	18	18	High	High	High	High	Peak Found	High	High	High	High	High	45	139.373	431.7
High	Q8NCW5	NAD(P)H-hydrate epimerase OS=Homo sapiens OX=9606 GN=NAXE PE=1 SV=2	APOA1BP; NAXE	ENSG00000163382.11	48	5	1.12706	0.032614	5.18997e+06	5.82663e+06	5.6102e+06	5.20193e+06	5.26391e+06	4.48826e+06	4.77262e+06	4.82058e+06	4611908	4.81392e+06	4.86022e+06	4.3004e+06	111777	2.14744e+06	3.32642e+06	4.77262e+06	4.18898e+06	1.7397e+06	6	5	5	5	3	5	5	5	5	4	High	High	High	High	Peak Found	High	High	High	High	High	29	38.329	44.45
High	Q8WX92	Negative elongation factor B OS=Homo sapiens OX=9606 GN=NELFB PE=1 SV=1	COBRA1; NELFB		17	3	1.11079	0.0328013	1.44986e+06	1.55133e+06	1.49321e+06	1.37324e+06	1.35815e+06	1.40412e+06	1.29138e+06	1.24343e+06	1.28837e+06	1.2817e+06	1.29359e+06	1.13525e+06	13970.9	554063	1.04064e+06	1.29138e+06	1.08052e+06	828416	3	3	3	3	1	3	3	3	3	3	High	High	High	High	Peak Found	High	High	High	High	High	6	9.103	1.64
High	Q02750	Dual specificity mitogen-activated protein kinase kinase 1 OS=Homo sapiens OX=9606 GN=MAP2K1 PE=1 SV=2	MAP2K1	ENSG00000169032.9	14	5	0.512285	0.0330103	1.34619e+06	1.75368e+06	1.19138e+06	1.02889e+06	2.91184e+06	1.6695e+06	3.41624e+06	2.04158e+06	1.19625e+06	1.44888e+06	1.03211e+06	850577	72120.6	1.1879e+06	1.23733e+06	3.41624e+06	1.77409e+06	1.2273e+06	3	4	2	2	2	4	3	4	4	3	High	Peak Found	Peak Found	High	Peak Found	High	High	High	High	High	30	22.59	4.86
High	Q96L92	Sorting nexin-27 OS=Homo sapiens OX=9606 GN=SNX27 PE=1 SV=2	SNX27	ENSG00000143376.12	7	4	1.38941	0.0331827	1.26681e+06	1.42716e+06	1.56619e+06	1.15609e+06	838820	1.14859e+06	583863	1.10011e+06	1.12571e+06	1.17911e+06	1.35682e+06	955731	49324.3	342200	851263	583863	955969	521643	4	4	4	3	1	3	4	2	4	3	High	High	High	High	Peak Found	Peak Found	High	High	Peak Found	Peak Found	11	14.342	0
High	Q9BVJ6	U3 small nucleolar RNA-associated protein 14 homolog A OS=Homo sapiens OX=9606 GN=UTP14A PE=1 SV=1	UTP14A	ENSG00000156697.12	31	7	0.851819	0.0332674	1.91964e+06	2.27051e+06	2.46388e+06	2.35343e+06	2.60915e+06	2.81916e+06	2.42442e+06	2.86664e+06	1.70583e+06	1.87588e+06	2.1345e+06	1.94556e+06		1.06442e+06	2.08939e+06	2.42442e+06	2.49105e+06	617967	7	7	7	7		7	7	7	7	6	High	High	High	High	Not Found	High	High	High	High	Peak Found	12	22.265	0
High	P47914	60S ribosomal protein L29 OS=Homo sapiens OX=9606 GN=RPL29 PE=1 SV=2	RPL29	ENSG00000162244.10	42	2	0.787149	0.0333792	2.18758e+07	2.5894e+07	2.61294e+07	2.71361e+07	2.58034e+07	3.55051e+07	3.27984e+07	3.32925e+07	1.94393e+07	2.13934e+07	2.26364e+07	2.24332e+07	275047	1.05266e+07	2.63142e+07	3.27984e+07	2.89304e+07	8.81849e+06	3	3	3	3	2	3	3	3	3	3	High	High	High	High	High	High	High	High	High	High	14	14.355	47.7
High	Q14690	Protein RRP5 homolog OS=Homo sapiens OX=9606 GN=PDCD11 PE=1 SV=3	PDCD11	ENSG00000148843.13	78	18	0.878943	0.0335808	5.63743e+06	6.59361e+06	6.15902e+06	6.3314e+06	6.43982e+06	6.85772e+06	7.37388e+06	7.353e+06	5.00953e+06	5.44759e+06	5.33566e+06	5.23412e+06	93635.1	2.62715e+06	5.08252e+06	7.37388e+06	6.3896e+06	4.35135e+06	14	15	14	14	4	15	13	15	15	15	High	High	High	High	Peak Found	High	High	High	High	High	13	57.675	12.03
High	Q14764	Major vault protein OS=Homo sapiens OX=9606 GN=MVP PE=1 SV=4	MVP	ENSG00000013364.18	188	25	0.839016	0.0337344	1.61001e+07	1.54606e+07	1.5492e+07	1.32131e+07	1.97218e+07	1.82063e+07	1.86852e+07	1.55734e+07	1.43069e+07	1.27734e+07	1.3421e+07	1.09232e+07	211241	8.0456e+06	1.34934e+07	1.86852e+07	1.35329e+07	7.06359e+06	24	23	23	24	8	23	24	24	22	22	High	High	High	High	Peak Found	High	High	High	High	High	48	155.854	147.98
High	Q8N9T8	Protein KRI1 homolog OS=Homo sapiens OX=9606 GN=KRI1 PE=1 SV=3	KRI1		11	2	0.899056	0.0339782	433836	478314	482332	504513	495629	521107	559581	547398	385516	395180	417852	417077		202194	386212	559581	475677	70032.3	2	2	2	2		2	2	2	2	1	High	High	High	Peak Found	Not Found	High	High	High	High	Peak Found	3	9	5.44
High	Q8WZA0	Protein LZIC OS=Homo sapiens OX=9606 GN=LZIC PE=1 SV=1	LZIC	ENSG00000162441.11	2	2	0.798211	0.0340644	472632	475474	562158	565824	695644	570977	765594	604302	419990	392833	487007	467762		283791	423173	765594	525125	519415	2	2	2	2		2	2	2	2	2	Peak Found	Peak Found	Peak Found	Peak Found	Not Found	Peak Found	High	Peak Found	Peak Found	High	10	4.905	0
High	O75907	Diacylglycerol O-acyltransferase 1 OS=Homo sapiens OX=9606 GN=DGAT1 PE=1 SV=2	DGAT1	ENSG00000185000.11	10	3	0.72209	0.0340976	979979	911972	1.09488e+06	869999	978562	1.3435e+06	1.29209e+06	1.32802e+06	870829	753464	948514	719221		399209	995717	1.29209e+06	1.15402e+06	639088	3	3	3	3		3	3	3	3	3	High	High	High	High	Not Found	High	Peak Found	High	High	Peak Found	10	14.037	6.91
High	Q9UMS4	Pre-mRNA-processing factor 19 OS=Homo sapiens OX=9606 GN=PRPF19 PE=1 SV=1	PRPF19	ENSG00000110107.8	204	14	0.875314	0.0341181	3.11192e+07	3.67606e+07	3.50937e+07	3.19817e+07	3.78017e+07	3.57721e+07	3.88283e+07	4.00943e+07	2.76532e+07	3.03713e+07	3.04023e+07	2.6439e+07	788554	1.54214e+07	2.65121e+07	3.88283e+07	3.48411e+07	1.94414e+07	17	16	16	16	11	17	15	16	17	18	High	High	High	High	Peak Found	High	High	High	High	High	62	142.546	244.97
High	Q96BW5	Phosphotriesterase-related protein OS=Homo sapiens OX=9606 GN=PTER PE=1 SV=1	PTER	ENSG00000165983.14	6	2	1.51691	0.0344393	560274	603627	734027	754471	369414	390949	608756	490878	497871	498712	635901	623715		150704	289747	608756	426562	189808	2	2	2	2		1	2	2	2	1	Peak Found	High	Peak Found	High	Not Found	Peak Found	High	High	High	Peak Found	11	6.603	1.64
High	P11908	Ribose-phosphate pyrophosphokinase 2 OS=Homo sapiens OX=9606 GN=PRPS2 PE=1 SV=2	PRPS2	ENSG00000101911.12	118	5	0.862329	0.0346522	5.39853e+06	6.37347e+06	6.5737e+06	6.15763e+06	6.42712e+06	7.02068e+06	7.6331e+06	7.51101e+06	4.79724e+06	5.26571e+06	5.69491e+06	5.09046e+06	20771.7	2.62197e+06	5.2033e+06	7.6331e+06	6.5269e+06	3.7656e+06	5	5	5	5	1	5	5	5	5	5	High	High	High	High	Peak Found	High	High	High	High	High	51	67.839	119.82
High	Q9BTY7	Protein HGH1 homolog OS=Homo sapiens OX=9606 GN=HGH1 PE=1 SV=1	FAM203B; FAM203A; HGH1	ENSG00000235173.6	19	5	1.49241	0.0349615	1.51301e+06	1.27283e+06	1.73957e+06	1.11584e+06	505560	784750	1.08192e+06	1.11841e+06	1.34449e+06	1.0516e+06	1.50702e+06	922456		206245	581608	1.08192e+06	971874	449491	4	3	4	3		2	3	4	4	3	High	High	High	High	Not Found	Peak Found	High	High	High	Peak Found	18	18.242	9.93
High	P51553	Isocitrate dehydrogenase [NAD] subunit gamma, mitochondrial OS=Homo sapiens OX=9606 GN=IDH3G PE=1 SV=1	IDH3G	ENSG00000067829.18	27	3	1.2739	0.0349647	1.72288e+06	1.81392e+06	2.08783e+06	1.59613e+06	1.40204e+06	854546	1.37432e+06	1.56789e+06	1.53098e+06	1.49865e+06	1.80872e+06	1.31951e+06	27967.4	571967	633337	1.37432e+06	1.36247e+06	811380	3	3	3	3	1	3	2	3	3	3	High	High	High	High	Peak Found	High	High	High	High	High	11	11.873	4.05
High	P52732	Kinesin-like protein KIF11 OS=Homo sapiens OX=9606 GN=KIF11 PE=1 SV=2	KIF11	ENSG00000138160.5	17	5	0.824118	0.0351663	2.20452e+06	2.11031e+06	2.18839e+06	2.03562e+06	2.94742e+06	2.3783e+06	2.83783e+06	2.25717e+06	1.95898e+06	1.74353e+06	1.89584e+06	1.68283e+06	28412.9	1.20241e+06	1.76265e+06	2.83783e+06	1.96143e+06	1.36113e+06	6	5	5	5	1	5	5	5	5	5	High	High	High	High	Peak Found	Peak Found	High	High	High	High	5	16.386	1.68
High	Q9Y295	Developmentally-regulated GTP-binding protein 1 OS=Homo sapiens OX=9606 GN=DRG1 PE=1 SV=1	DRG1	ENSG00000185721.12	89	12	0.877357	0.0351675	1.05966e+07	1.24303e+07	1.24729e+07	1.35278e+07	1.47152e+07	1.34497e+07	1.52283e+07	1.36691e+07	9.41637e+06	1.02698e+07	1.08055e+07	1.11834e+07	190515	6.00313e+06	9.96808e+06	1.52283e+07	1.18781e+07	8.19272e+06	12	12	12	12	4	12	12	12	12	12	High	High	High	High	Peak Found	High	High	High	High	High	50	68.777	97.39
High	Q13573	SNW domain-containing protein 1 OS=Homo sapiens OX=9606 GN=SNW1 PE=1 SV=1	SNW1	ENSG00000100603.13	17	5	0.763906	0.0352272	1.60419e+06	1.52269e+06	1.11287e+06	1.94486e+06	1.91813e+06	1.91513e+06	2.27693e+06	2.17516e+06	1.42552e+06	1.25804e+06	964097	1.6078e+06		782508	1.41938e+06	2.27693e+06	1.89017e+06	268684	5	4	3	5		5	4	5	5	3	Peak Found	High	High	High	Not Found	Peak Found	High	High	High	Peak Found	14	15.244	4.05
High	Q9NUM4	Transmembrane protein 106B OS=Homo sapiens OX=9606 GN=TMEM106B PE=1 SV=2	TMEM106B	ENSG00000106460.18	29	4	1.29513	0.035309	2.1721e+06	2.65792e+06	2.64448e+06	2.17937e+06	1.83882e+06	1.99598e+06	1.88578e+06	967322	1.93017e+06	2.19596e+06	2.29096e+06	1.80167e+06	38516.6	750154	1.4793e+06	1.88578e+06	840582	492852	4	4	4	4	1	4	4	4	3	3	High	High	High	High	Peak Found	High	High	High	High	High	18	13.016	0
High	P19784	Casein kinase II subunit alpha' OS=Homo sapiens OX=9606 GN=CSNK2A2 PE=1 SV=1	CSNK2A2	ENSG00000070770.8	25	8	0.872411	0.0354677	3.23129e+06	2.88825e+06	3.63968e+06	3.56386e+06	4.34277e+06	3.64988e+06	3.8082e+06	3.98073e+06	2.87139e+06	2.38625e+06	3.15312e+06	2.94621e+06		1.77165e+06	2.70507e+06	3.8082e+06	3.45916e+06	2.71518e+06	8	6	8	8		8	8	8	8	9	High	High	High	High	Not Found	High	High	High	High	High	35	35.162	7.95
High	P23284	Peptidyl-prolyl cis-trans isomerase B OS=Homo sapiens OX=9606 GN=PPIB PE=1 SV=2	PPIB	ENSG00000166794.4	353	10	0.898027	0.0355953	6.42545e+07	7.32851e+07	6.95543e+07	7.00248e+07	7.09507e+07	7.7948e+07	7.74806e+07	7.8648e+07	5.70978e+07	6.05476e+07	60256103	5.7889e+07	1.68863e+06	2.89446e+07	5.77703e+07	7.74806e+07	6.83434e+07	3.56458e+07	12	12	12	12	9	12	12	12	12	12	High	High	High	High	High	High	High	High	High	High	45	48.723	326.86
High	Q9BY77	Polymerase delta-interacting protein 3 OS=Homo sapiens OX=9606 GN=POLDIP3 PE=1 SV=2	POLDIP3	ENSG00000100227.17	46	9	0.898081	0.0356062	3.55707e+06	3.85327e+06	3.74993e+06	3.39582e+06	3.9365e+06	4.35293e+06	3.80277e+06	4.19974e+06	3.16088e+06	3.18354e+06	3.24863e+06	2.8073e+06		1.60591e+06	3.22612e+06	3.80277e+06	3.64948e+06	1.64449e+06	7	7	7	7		7	7	7	7	7	High	High	High	High	Not Found	High	High	High	High	High	33	32.686	17.9
High	P62487	DNA-directed RNA polymerase II subunit RPB7 OS=Homo sapiens OX=9606 GN=POLR2G PE=1 SV=1	POLR2G	ENSG00000168002.11	7	2	0.68754	0.0356562	338708	431583	508987	429197	449445	604931	700278	647040	300983	356571	440944	354814		183353	448338	700278	562264	226823	2	2	2	2		2	2	2	2	1	High	Peak Found	High	Peak Found	Not Found	Peak Found	High	High	High	Peak Found	12	7.652	0
High	Q9NU22	Midasin OS=Homo sapiens OX=9606 GN=MDN1 PE=1 SV=2	MDN1	ENSG00000112159.11	3	2	0.78017	0.0358706	145386	133202	114142	164483	153839	174634	182452	200162	129193	110051	98883.5	135977		62759.4	129428	182452	173936	85761.8	1	1	1	1		1	1	1	1	1	Peak Found	Peak Found	Peak Found	Peak Found	Not Found	Peak Found	High	High	Peak Found	High	1	4.802	0
High	Q9NX40	OCIA domain-containing protein 1 OS=Homo sapiens OX=9606 GN=OCIAD1 PE=1 SV=1	OCIAD1	ENSG00000109180.14	52	6	0.880396	0.0361033	4.17777e+06	4.63555e+06	4.65506e+06	4.42854e+06	4.51761e+06	5.14933e+06	5.14613e+06	5.25662e+06	3.71245e+06	3.82986e+06	4.03276e+06	3.66104e+06	76900.8	1.84298e+06	3.81637e+06	5.14613e+06	4.56789e+06	2.74877e+06	6	6	6	6	2	6	6	6	6	6	High	High	High	High	Peak Found	High	High	High	High	High	28	28.962	28.74
High	P40937	Replication factor C subunit 5 OS=Homo sapiens OX=9606 GN=RFC5 PE=1 SV=1	RFC5	ENSG00000111445.13	12	3	0.938569	0.0361644	1.19885e+06	1.32248e+06	1.34448e+06	1.35055e+06	1.54904e+06	1.38883e+06	1.45268e+06	1.38659e+06	1.06532e+06	1.09262e+06	1.16474e+06	1.11649e+06		631937	1.02932e+06	1.45268e+06	1.20491e+06	831362	3	3	3	3		3	2	3	3	3	High	High	High	High	Not Found	Peak Found	Peak Found	High	High	High	14	10.471	0
High	Q9BY32	Inosine triphosphate pyrophosphatase OS=Homo sapiens OX=9606 GN=ITPA PE=1 SV=2	ITPA	ENSG00000125877.12	18	5	0.816443	0.0362186	1.69028e+06	1.64224e+06	1.76455e+06	1.23242e+06	1.73118e+06	2.28205e+06	2.03342e+06	2.04833e+06	1.50202e+06	1.3568e+06	1.52866e+06	1.01883e+06	49379.5	706243	1.69132e+06	2.03342e+06	1.77996e+06	1.52542e+06	3	3	3	2	1	3	3	3	3	3	High	High	High	High	Peak Found	High	High	High	High	High	46	18.912	1.82
High	Q96AE4	Far upstream element-binding protein 1 OS=Homo sapiens OX=9606 GN=FUBP1 PE=1 SV=3	FUBP1	ENSG00000162613.16	174	10	0.842423	0.0362471	1.44808e+07	1.39171e+07	1.56779e+07	1.63258e+07	1.62724e+07	2.07392e+07	1.8912e+07	1.68879e+07	1.2868e+07	1.14982e+07	1.3582e+07	1.34964e+07	125088	6.63841e+06	1.53706e+07	1.8912e+07	1.46753e+07	8.82773e+06	10	10	9	10	4	9	9	10	10	10	High	High	High	High	Peak Found	High	High	High	High	High	31	60.312	115.88
High	P24534	Elongation factor 1-beta OS=Homo sapiens OX=9606 GN=EEF1B2 PE=1 SV=3	EEF1B2	ENSG00000283391.1; ENSG00000114942.13	114	7	0.793386	0.036342	9.16279e+06	1.10205e+07	1.19282e+07	1.06191e+07	1.50791e+07	1.2138e+07	1.64901e+07	1.21957e+07	8.14224e+06	9.10502e+06	1.03336e+07	8.77869e+06	166284	6.1516e+06	8.99594e+06	1.64901e+07	1.05978e+07	1.29331e+06	8	8	8	8	3	8	7	8	8	5	High	High	High	High	Peak Found	High	High	High	High	High	67	69.367	132.32
High	Q69YN2	CWF19-like protein 1 OS=Homo sapiens OX=9606 GN=CWF19L1 PE=1 SV=2	CWF19L1	ENSG00000095485.16	20	5	0.76172	0.0363914	1.26644e+06	1.11333e+06	1.70241e+06	1.29257e+06	1.64781e+06	1.63091e+06	1.79091e+06	1.71171e+06	1.12538e+06	919824	1.47483e+06	1.06856e+06		672229	1.20873e+06	1.79091e+06	1.48744e+06	567403	5	4	5	5		5	5	5	5	3	High	High	High	High	Not Found	Peak Found	High	High	High	High	14	16.817	1.88
High	P68400	Casein kinase II subunit alpha OS=Homo sapiens OX=9606 GN=CSNK2A1 PE=1 SV=1	CSNK2A1	ENSG00000101266.17	78	10	0.888502	0.0364123	8.42317e+06	9.53319e+06	1.09063e+07	1.05569e+07	1.11792e+07	1.18904e+07	1.11852e+07	1.1426e+07	7.485e+06	7.87625e+06	9.44831e+06	8.72727e+06	196264	4.56062e+06	8.81244e+06	1.11852e+07	9.92891e+06	6.22028e+06	8	9	10	10	4	10	10	10	10	9	High	High	High	High	Peak Found	High	High	High	High	High	38	50.658	69.65
High	O00592	Podocalyxin OS=Homo sapiens OX=9606 GN=PODXL PE=1 SV=2	PODXL	ENSG00000128567.16	22	5	0.791172	0.0365953	5.76548e+06	5.07523e+06	6.22436e+06	6.05129e+06	5.99891e+06	8.57561e+06	7.74415e+06	7.19164e+06	5.12332e+06	4.19312e+06	5.39227e+06	5.00256e+06	43067.9	2.44728e+06	6.35571e+06	7.74415e+06	6.24938e+06	3.49095e+06	5	5	5	5	1	5	5	5	5	5	High	High	High	High	Peak Found	High	High	High	High	High	10	16.051	2
High	Q12959	Disks large homolog 1 OS=Homo sapiens OX=9606 GN=DLG1 PE=1 SV=2	DLG1	ENSG00000075711.20	35	7	0.879413	0.0369306	2.12907e+06	2.6413e+06	2.83794e+06	2.5067e+06	2.85473e+06	2.9461e+06	2.90781e+06	3.18354e+06	1.89194e+06	2.18223e+06	2.45856e+06	2.07227e+06		1.1646e+06	2.18347e+06	2.90781e+06	2.76642e+06	891895	7	5	6	5		8	7	7	8	5	High	High	High	High	Not Found	High	High	High	High	High	14	29.077	1.89
High	P20290	Transcription factor BTF3 OS=Homo sapiens OX=9606 GN=BTF3 PE=1 SV=1	BTF3	ENSG00000145741.15	136	5	0.798387	0.0370284	2.6585e+07	2.80701e+07	2.51607e+07	2.4248e+07	3.4942e+07	2.6178e+07	3.21795e+07	3.26334e+07	2.3624e+07	2.31913e+07	2.17972e+07	2.00457e+07	227377	1.42548e+07	1.94015e+07	3.21795e+07	2.83577e+07	6.51807e+06	9	9	9	9	3	9	9	9	9	7	High	High	High	High	Peak Found	High	High	High	High	High	50	90.231	217.02
High	P20020	Plasma membrane calcium-transporting ATPase 1 OS=Homo sapiens OX=9606 GN=ATP2B1 PE=1 SV=4			48	9	0.911196	0.0370666	3.29992e+06	3.72714e+06	3.66202e+06	3.28201e+06	4.01922e+06	3.73665e+06	3.87211e+06	3.76833e+06	2.93237e+06	3.07933e+06	3.17248e+06	2.71321e+06		1.63966e+06	2.76937e+06	3.87211e+06	3.2746e+06	2.48749e+06	9	9	9	9		9	9	9	9	9	High	High	High	High	Not Found	High	High	High	High	High	12	37.94	22.04
High	Q9UGP8	Translocation protein SEC63 homolog OS=Homo sapiens OX=9606 GN=SEC63 PE=1 SV=2	SEC63	ENSG00000025796.13	25	4	0.884372	0.037265	902391	1.14355e+06	1.16207e+06	1.10021e+06	1.27058e+06	1.26655e+06	1.17132e+06	1.30605e+06	801883	944795	1.00672e+06	909538		518337	938690	1.17132e+06	1.13493e+06	711371	4	4	4	4		4	4	4	4	4	High	High	High	High	Not Found	High	High	High	High	High	7	14.753	23.42
High	P46379	Large proline-rich protein BAG6 OS=Homo sapiens OX=9606 GN=BAG6 PE=1 SV=2	BAG6	ENSG00000204463.12; ENSG00000096155.15; ENSG00000229524.10; ENSG00000233348.10	74	11	1.1094	0.0372723	6.3463e+06	6.74321e+06	7.03219e+06	7.02354e+06	5.93861e+06	5.98688e+06	6.49297e+06	6.42231e+06	5.63945e+06	5.57119e+06	6.09211e+06	5.80631e+06	88993.8	2.42268e+06	4.43711e+06	6.49297e+06	5.58085e+06	3.78702e+06	11	10	10	11	2	11	11	10	10	11	High	High	High	High	Peak Found	High	High	High	High	High	17	44.594	32.68
High	Q99575	Ribonucleases P/MRP protein subunit POP1 OS=Homo sapiens OX=9606 GN=POP1 PE=1 SV=2	POP1	ENSG00000104356.10	21	7	0.823666	0.03734	1.32248e+06	1.31335e+06	1.43092e+06	1.30652e+06	1.63193e+06	1.58103e+06	1.61909e+06	1.33873e+06	1.17518e+06	1.08508e+06	1.23963e+06	1.08009e+06		665753	1.17176e+06	1.61909e+06	1.16333e+06	858660	6	5	6	6		6	5	7	5	5	High	High	High	High	Not Found	High	High	High	High	High	11	20.871	5.88
High	P06730	Eukaryotic translation initiation factor 4E OS=Homo sapiens OX=9606 GN=EIF4E PE=1 SV=2	EIF4E	ENSG00000151247.12	59	6	0.856649	0.037384	1.13676e+07	1.31092e+07	1.2595e+07	1.33093e+07	1.29791e+07	1.56989e+07	1.56626e+07	1.4343e+07	1.01015e+07	1.08307e+07	1.09113e+07	1.10027e+07	359198	5.29486e+06	1.16351e+07	1.56626e+07	1.24637e+07	7.14264e+06	6	6	6	6	6	6	6	6	6	6	High	High	High	High	Peak Found	High	High	High	High	High	35	28.748	48.52
High	Q15005	Signal peptidase complex subunit 2 OS=Homo sapiens OX=9606 GN=SPCS2 PE=1 SV=3	SPCS2	ENSG00000118363.11	30	4	0.839552	0.0374755	3.03359e+06	3.26209e+06	2.78178e+06	2.88698e+06	3.06536e+06	3.47614e+06	3.57592e+06	3.752e+06	2.69571e+06	2.69512e+06	2.4099e+06	2.38664e+06	33012	1.25053e+06	2.5763e+06	3.57592e+06	3.2604e+06	1.64474e+06	4	4	4	3	1	4	4	4	4	3	High	High	High	High	Peak Found	High	High	High	High	High	27	17.672	42.6
High	Q9NP79	Vacuolar protein sorting-associated protein VTA1 homolog OS=Homo sapiens OX=9606 GN=VTA1 PE=1 SV=1	VTA1	ENSG00000009844.15	47	4	0.91478	0.0375804	4.19201e+06	4.53e+06	4.68818e+06	4.35051e+06	5.23689e+06	5.00813e+06	4.69967e+06	4.66159e+06	3.72511e+06	3.74265e+06	4.06146e+06	3.59653e+06	58835.6	2.13641e+06	3.71172e+06	4.69967e+06	4.05082e+06	2.53218e+06	4	4	4	4	2	4	4	4	4	4	High	High	High	High	Peak Found	High	High	High	High	High	22	21.183	32.61
High	P26599	Polypyrimidine tract-binding protein 1 OS=Homo sapiens OX=9606 GN=PTBP1 PE=1 SV=1	PTBP1	ENSG00000011304.19	520	17	0.859804	0.0376442	8.03157e+07	9.23298e+07	8.84414e+07	8.67244e+07	1.19096e+08	9.19424e+07	9.87996e+07	1.04928e+08	7.13701e+07	7.62822e+07	7.66183e+07	7.16944e+07	2.10164e+06	4.85859e+07	6.8142e+07	9.87996e+07	9.118e+07	6.02709e+07	27	27	24	24	14	26	24	25	27	24	High	High	High	High	High	High	High	High	High	High	67	230.45	785.93
High	P14923	Junction plakoglobin OS=Homo sapiens OX=9606 GN=JUP PE=1 SV=3	JUP	ENSG00000173801.16	298	22	1.16766	0.0384576	7.38395e+07	5.77583e+07	5.9825e+07	6.3011e+07	5.7699e+07	5.00026e+07	5.20275e+07	5.3171e+07	6.56153e+07	4.77195e+07	5.18275e+07	5.20907e+07	5.12687e+06	2.35385e+07	3.70589e+07	5.20275e+07	4.62045e+07	2.68962e+07	25	25	25	25	21	24	25	25	25	25	High	High	High	High	High	High	High	High	High	High	46	175.944	338.44
High	Q9Y6C9	Mitochondrial carrier homolog 2 OS=Homo sapiens OX=9606 GN=MTCH2 PE=1 SV=1	MTCH2	ENSG00000109919.9	165	11	1.12292	0.0384583	1.76974e+07	2.00516e+07	1.95782e+07	1.80196e+07	1.76276e+07	1.58545e+07	1.57922e+07	1.77404e+07	1.57263e+07	1.65665e+07	1.69609e+07	1.48966e+07	428574	7.19124e+06	1.17504e+07	1.57922e+07	1.5416e+07	9.7804e+06	11	11	11	10	7	10	11	10	10	10	High	High	High	High	Peak Found	High	High	High	High	High	52	87.372	109.4
High	Q86X55	Histone-arginine methyltransferase CARM1 OS=Homo sapiens OX=9606 GN=CARM1 PE=1 SV=3	CARM1	ENSG00000142453.11	43	9	0.823395	0.0388236	5.9692e+06	5.89606e+06	5.9638e+06	6.89516e+06	6.55924e+06	6.85448e+06	7.63796e+06	7.98953e+06	5.30435e+06	4.87128e+06	5.16654e+06	5.70017e+06	224073	2.67587e+06	5.08012e+06	7.63796e+06	6.94273e+06	4.21749e+06	9	8	8	9	3	9	9	9	9	9	High	High	High	High	Peak Found	High	High	High	High	High	24	39.511	34.92
High	P78310	Coxsackievirus and adenovirus receptor OS=Homo sapiens OX=9606 GN=CXADR PE=1 SV=1	CXADR	ENSG00000154639.18	16	4	1.31806	0.0394627	1.32412e+06	1.38901e+06	1.47911e+06	1.30611e+06	1.35157e+06	840707	1.11987e+06	938560	1.17664e+06	1.14759e+06	1.28138e+06	1.07975e+06	25629.7	551377	623080	1.11987e+06	815588	585189	3	3	3	3	1	3	3	3	3	3	High	High	High	High	Peak Found	Peak Found	High	High	High	High	17	13.205	5.1
High	P11142	Heat shock cognate 71 kDa protein OS=Homo sapiens OX=9606 GN=HSPA8 PE=1 SV=1	HSPA8	ENSG00000109971.13	3084	22	0.937376	0.0394632	6.94451e+08	7.8388e+08	7.78364e+08	7.31779e+08	8.18178e+08	7.96264e+08	8.14768e+08	7.91272e+08	6.17103e+08	6.47636e+08	6.7431e+08	6.04956e+08	1.85742e+07	3.33779e+08	5.90141e+08	8.14768e+08	6.87598e+08	3.7182e+08	47	43	46	45	31	45	45	45	46	44	High	High	High	High	High	High	High	High	High	High	76	506.617	4150.36
High	Q96HY6	DDRGK domain-containing protein 1 OS=Homo sapiens OX=9606 GN=DDRGK1 PE=1 SV=2	DDRGK1	ENSG00000198171.12	39	6	1.22116	0.0396759	3.09227e+06	3.82938e+06	3.55309e+06	3.51636e+06	3.34202e+06	2.85778e+06	2.86859e+06	2.92052e+06	2.74785e+06	3.16381e+06	3.0781e+06	2.90694e+06	30498.1	1.36339e+06	2.11801e+06	2.86859e+06	2.53787e+06	2.11651e+06	6	7	6	6	2	6	6	6	5	6	High	High	High	High	Peak Found	High	High	High	High	High	35	36.83	26.57
High	A0MZ66	Shootin-1 OS=Homo sapiens OX=9606 GN=SHTN1 PE=1 SV=4	KIAA1598; SHTN1	ENSG00000187164.19	19	6	0.823404	0.0396843	3.13998e+06	3.49216e+06	4.01458e+06	3.65374e+06	3.79109e+06	4.50471e+06	4.81056e+06	4.17378e+06	2.79025e+06	2.8852e+06	3.4779e+06	3.02052e+06	40215.7	1.54659e+06	3.33861e+06	4.81056e+06	3.62693e+06	2.01554e+06	6	5	6	6	1	6	6	6	6	6	High	Peak Found	High	Peak Found	Peak Found	High	High	High	High	High	12	20.605	3.84
High	Q14008	Cytoskeleton-associated protein 5 OS=Homo sapiens OX=9606 GN=CKAP5 PE=1 SV=3	CKAP5	ENSG00000175216.14	106	20	0.870462	0.0399046	8.70937e+06	9.15845e+06	9.7542e+06	8.05541e+06	9.366e+06	1.11795e+07	1.03154e+07	1.02114e+07	7.73932e+06	7.56664e+06	8.45023e+06	6.65934e+06	141431	3.8209e+06	8.28559e+06	1.03154e+07	8.87351e+06	6.91637e+06	19	19	17	17	2	19	20	20	19	20	High	High	High	High	Peak Found	High	High	High	High	High	13	81.167	35.63
High	Q15036	Sorting nexin-17 OS=Homo sapiens OX=9606 GN=SNX17 PE=1 SV=1	SNX17	ENSG00000115234.10	25	5	1.26825	0.0400557	2.14259e+06	2.37074e+06	2.36067e+06	2.21977e+06	2.2617e+06	1.55045e+06	1.8637e+06	1.74792e+06	1.90395e+06	1.95869e+06	2.04509e+06	1.83506e+06		922670	1.1491e+06	1.8637e+06	1.5189e+06	1.03207e+06	4	4	4	4		4	4	4	4	4	High	High	High	High	Not Found	High	High	High	High	High	17	18.701	3.6
High	O75844	CAAX prenyl protease 1 homolog OS=Homo sapiens OX=9606 GN=ZMPSTE24 PE=1 SV=2	ZMPSTE24	ENSG00000084073.8	46	5	0.871092	0.0400923	3.92942e+06	4.47602e+06	4.1461e+06	4.2244e+06	5.72345e+06	4.48071e+06	4.83544e+06	4.77376e+06	3.49176e+06	3.69805e+06	3.59184e+06	3.49228e+06	110315	2.3349e+06	3.32082e+06	4.83544e+06	4.14829e+06	3.02124e+06	5	5	5	5	4	5	5	5	5	5	High	High	High	High	Peak Found	High	High	High	High	High	12	23.622	26.08
High	Q00839	Heterogeneous nuclear ribonucleoprotein U OS=Homo sapiens OX=9606 GN=HNRNPU PE=1 SV=6	HNRNPU	ENSG00000153187.18	932	21	0.926637	0.0402177	2.09647e+08	2.48983e+08	2.34498e+08	2.38767e+08	2.49455e+08	2.54162e+08	2.56572e+08	2.67252e+08	1.86297e+08	2.05708e+08	2.0315e+08	1.97387e+08	5.56619e+06	1.01766e+08	1.88369e+08	2.56572e+08	2.32236e+08	1.16839e+08	31	31	31	32	21	31	31	30	31	31	High	High	High	High	High	High	High	High	High	High	37	243.357	929.06
High	Q96EK6	Glucosamine 6-phosphate N-acetyltransferase OS=Homo sapiens OX=9606 GN=GNPNAT1 PE=1 SV=1	GNPNAT1	ENSG00000100522.8	53	6	0.878848	0.0402626	4.95177e+06	6.14036e+06	5.83076e+06	5.33315e+06	6.09339e+06	6.26862e+06	6.43427e+06	7.19767e+06	4.40024e+06	5.07312e+06	5.05129e+06	4.40887e+06	61079.5	2.48582e+06	4.64591e+06	6.43427e+06	6.25461e+06	3.77133e+06	5	6	6	5	2	5	5	5	6	6	High	High	High	High	Peak Found	High	High	High	High	High	56	39.336	55.97
High	P62306	Small nuclear ribonucleoprotein F OS=Homo sapiens OX=9606 GN=SNRPF PE=1 SV=1	SNRPF	ENSG00000139343.10	10	2	1.57693	0.0402681	579044	815654	669198	752733	503726	381993	665968	397983	514550	673887	579738	622279		205497	283110	665968	345839	1.41785e+06	2	2	2	2		2	1	1	1	2	Peak Found	High	High	High	Not Found	High	High	High	High	High	24	5.898	5.49
High	Q3MHD2	Protein LSM12 homolog OS=Homo sapiens OX=9606 GN=LSM12 PE=1 SV=2	LSM12; LSM12P1	ENSG00000161654.9	9	2	0.833444	0.0403822	570489	613835	612410	640830	775759	749848	721450	606882	506948	507146	530541	529769		316474	555741	721450	527367	350605	2	2	2	2		2	2	2	2	2	High	High	Peak Found	High	Not Found	High	High	High	High	High	11	7.646	1.99
High	O95292	Vesicle-associated membrane protein-associated protein B/C OS=Homo sapiens OX=9606 GN=VAPB PE=1 SV=3	VAPB	ENSG00000124164.15	40	3	1.19058	0.040395	3.70875e+06	4.01408e+06	3.86857e+06	3.59568e+06	2.51229e+06	3.66105e+06	3.23834e+06	3.12603e+06	3.29567e+06	3.31641e+06	3.35141e+06	2.97252e+06	59974.8	1.0249e+06	2.71334e+06	3.23834e+06	2.71645e+06	1.84386e+06	3	3	3	3	2	3	3	3	3	3	High	High	High	High	Peak Found	High	High	High	High	High	22	25.538	33.38
High	O00231	26S proteasome non-ATPase regulatory subunit 11 OS=Homo sapiens OX=9606 GN=PSMD11 PE=1 SV=3	PSMD11	ENSG00000108671.9	268	24	0.914433	0.0406351	4.22229e+07	5.04278e+07	4.90126e+07	4.62669e+07	5.02308e+07	5.16026e+07	5.25925e+07	5.42815e+07	3.75201e+07	4.16631e+07	4.24605e+07	3.82484e+07	798356	2.04918e+07	3.82447e+07	5.25925e+07	4.71695e+07	2.95998e+07	23	23	23	22	13	22	24	24	23	22	High	High	High	High	Peak Found	High	High	High	High	High	70	134.697	324.32
High	Q6P6C2	RNA demethylase ALKBH5 OS=Homo sapiens OX=9606 GN=ALKBH5 PE=1 SV=2	ALKBH5	ENSG00000091542.8	9	2	0.63119	0.0409512	591757	725882	395254	318392	888356	809884	753845	661524	525847	599718	342415	263212		362408	600236	753845	574850	148643	2	2	1	1		2	2	2	2	1	High	Peak Found	Peak Found	High	Not Found	High	Peak Found	High	High	Peak Found	10	6.467	0
High	Q99805	Transmembrane 9 superfamily member 2 OS=Homo sapiens OX=9606 GN=TM9SF2 PE=1 SV=1	TM9SF2	ENSG00000125304.8	39	9	1.36233	0.0410014	7.87222e+06	8.98549e+06	8.777e+06	8.3005e+06	5.31458e+06	7.22096e+06	5.12035e+06	8.16537e+06	6.99541e+06	7.42374e+06	7.60366e+06	6.86196e+06	156731	2.16811e+06	5.35173e+06	5.12035e+06	7.09553e+06	4.61126e+06	9	8	9	9	2	8	8	8	9	8	High	High	High	High	Peak Found	High	High	High	High	High	21	41.427	30.86
High	Q6NYC1	Bifunctional arginine demethylase and lysyl-hydroxylase JMJD6 OS=Homo sapiens OX=9606 GN=JMJD6 PE=1 SV=1	JMJD6	ENSG00000070495.14	19	5	0.798111	0.0412018	1.21958e+06	1.41489e+06	1.31781e+06	1.28923e+06	2.2433e+06	1.50385e+06	1.62187e+06	1.64463e+06	1.08374e+06	1.16897e+06	1.14164e+06	1.06579e+06		915164	1.11456e+06	1.62187e+06	1.42915e+06	536253	4	4	4	4		4	4	4	4	3	High	High	High	High	Not Found	High	High	High	High	Peak Found	21	22.823	13.68
High	Q16718	NADH dehydrogenase [ubiquinone] 1 alpha subcomplex subunit 5 OS=Homo sapiens OX=9606 GN=NDUFA5 PE=1 SV=3	NDUFA5	ENSG00000128609.14	27	5	1.40194	0.0413036	2.56102e+06	2.38863e+06	3.24141e+06	2.72189e+06	2.47193e+06	2.00318e+06	1.76511e+06	1.0391e+06	2.27577e+06	1.97347e+06	2.80809e+06	2.25017e+06	57102.5	1.00844e+06	1.48464e+06	1.76511e+06	902953	3.28756e+06	4	4	4	4	2	4	5	4	4	5	High	High	High	High	Peak Found	High	High	High	High	High	57	44.426	15.55
High	Q9NXV2	BTB/POZ domain-containing protein KCTD5 OS=Homo sapiens OX=9606 GN=KCTD5 PE=1 SV=1	KCTD5	ENSG00000167977.8	4	2	1.18731	0.0414485	873454	803613	887010	824378	425530	731310	698669	735449	776168	663939	768432	681507		173597	542002	698669	639089	252840	2	2	2	2		1	2	2	2	2	High	High	Peak Found	Peak Found	Not Found	Peak Found	High	Peak Found	Peak Found	Peak Found	12	6.022	0
High	P01130	Low-density lipoprotein receptor OS=Homo sapiens OX=9606 GN=LDLR PE=1 SV=1	LDLR	ENSG00000130164.13	26	5	1.45764	0.0418376	2.86221e+06	3.82551e+06	4.18334e+06	2.9205e+06	2.07198e+06	1.98072e+06	3.00038e+06	2.55605e+06	2543417	3.1606e+06	3.6241e+06	2.41435e+06	27018.2	845271	1.46799e+06	3.00038e+06	2.22115e+06	1.46103e+06	4	5	5	4	1	3	3	4	4	4	High	High	High	High	Peak Found	High	High	High	High	High	8	18.469	14.65
High	P51649	Succinate-semialdehyde dehydrogenase, mitochondrial OS=Homo sapiens OX=9606 GN=ALDH5A1 PE=1 SV=2	ALDH5A1	ENSG00000112294.12	5	2	1.4187	0.0418494	339621	384080	324186	343014	121833	327960	226308	254863	301794	317324	280848	283567		49702.4	243064	226308	221470	136793	1	1	1	1		1	1	1	1	1	High	High	High	High	Not Found	Peak Found	Peak Found	Peak Found	Peak Found	Peak Found	5	5.434	0
High	Q06830	Peroxiredoxin-1 OS=Homo sapiens OX=9606 GN=PRDX1 PE=1 SV=1	PRDX1	ENSG00000117450.13	845	11	0.837204	0.0419022	2.485e+08	2.64396e+08	2.79667e+08	2.82142e+08	2.74961e+08	3.45529e+08	3.48389e+08	3.04328e+08	2.20822e+08	2.18442e+08	2.42281e+08	2.33244e+08	4.96395e+06	1.12171e+08	2.56085e+08	3.48389e+08	2.64455e+08	1.71213e+08	14	16	16	16	12	16	14	16	16	16	High	High	High	High	High	High	High	High	High	High	85	112.039	1023.02
High	P54886	Delta-1-pyrroline-5-carboxylate synthase OS=Homo sapiens OX=9606 GN=ALDH18A1 PE=1 SV=2	ALDH18A1	ENSG00000059573.8	189	22	0.922894	0.0420803	2.06759e+07	2.3262e+07	2.25552e+07	2.35488e+07	2.48001e+07	2.32227e+07	2.48451e+07	2.57654e+07	18372977	19218913	1.954e+07	1.94676e+07	433635	1.01173e+07	1.72112e+07	2.48451e+07	2.23896e+07	1.51782e+07	23	23	22	23	10	23	22	23	22	22	High	High	High	High	Peak Found	High	High	High	High	High	36	112.794	122.6
High	O15042	U2 snRNP-associated SURP motif-containing protein OS=Homo sapiens OX=9606 GN=U2SURP PE=1 SV=2	U2SURP	ENSG00000163714.17	72	10	0.847548	0.0420836	1.33569e+07	1.67221e+07	1.51557e+07	1.54749e+07	1.5771e+07	1.84711e+07	1.76691e+07	1.89144e+07	1.18692e+07	1.38157e+07	1.31296e+07	1.2793e+07	275503	6.43386e+06	1.36897e+07	1.76691e+07	1.64362e+07	8.06882e+06	10	10	10	10	3	9	10	10	10	10	High	High	High	High	Peak Found	High	High	High	High	High	14	56.548	52.52
High	Q9NVS9	Pyridoxine-5'-phosphate oxidase OS=Homo sapiens OX=9606 GN=PNPO PE=1 SV=1	PNPO	ENSG00000108439.9	54	6	0.683853	0.0421792	4.20344e+06	3.70385e+06	4.82248e+06	4.17919e+06	6.18777e+06	6.54822e+06	6.07017e+06	4.14524e+06	3.73526e+06	3.0601e+06	4.1778e+06	3.4549e+06	63106.4	2.52432e+06	4.85314e+06	6.07017e+06	3.60213e+06	4.04155e+06	6	6	6	6	2	6	6	6	6	6	High	High	High	High	Peak Found	High	High	High	High	High	32	38.073	33.4
High	Q86VU5	Catechol O-methyltransferase domain-containing protein 1 OS=Homo sapiens OX=9606 GN=COMTD1 PE=1 SV=1	COMTD1	ENSG00000165644.10	25	5	1.51952	0.0428132	1.69077e+06	1.86562e+06	1.86563e+06	1.68008e+06	1.73583e+06	656421	1.28399e+06	1.05648e+06	1.50245e+06	1.54136e+06	1.61623e+06	1.38891e+06	32121.3	708137	486499	1.28399e+06	918060	720060	5	5	5	5	1	4	4	5	5	5	High	High	High	High	Peak Found	High	High	High	High	High	33	22.834	10.44
High	Q9H9Q2	COP9 signalosome complex subunit 7b OS=Homo sapiens OX=9606 GN=COPS7B PE=1 SV=1	COPS7B	ENSG00000144524.17	3	2	0.781742	0.0428652	523146	538945	555952	507579	865877	559616	691197	667425	464878	445272	481631	419612		353238	414753	691197	579978	286979	2	2	2	2		2	2	2	2	2	Peak Found	High	Peak Found	Peak Found	Not Found	High	Peak Found	High	Peak Found	Peak Found	12	4.982	0
High	Q9HC38	Glyoxalase domain-containing protein 4 OS=Homo sapiens OX=9606 GN=GLOD4 PE=1 SV=1	GLOD4	ENSG00000167699.13	132	14	1.15303	0.0428926	1.59886e+07	1.70302e+07	1.75876e+07	1.76828e+07	1.31311e+07	1.54683e+07	1.66123e+07	1.45549e+07	1.42078e+07	1.40702e+07	1.52364e+07	1.46182e+07	513227	5.3569e+06	1.14642e+07	1.66123e+07	1.26479e+07	1.25743e+07	16	16	16	15	7	15	16	16	16	16	High	High	High	High	Peak Found	High	High	High	High	High	59	74.044	60.8
High	Q9Y5B9	FACT complex subunit SPT16 OS=Homo sapiens OX=9606 GN=SUPT16H PE=1 SV=1	SUPT16H	ENSG00000092201.9	175	19	0.927801	0.0432141	1.2995e+07	1.47128e+07	1.51068e+07	1.40864e+07	1.62337e+07	1.53117e+07	1.57286e+07	1.50372e+07	1.15477e+07	1.21556e+07	1.30873e+07	1.16451e+07	240496	6.62259e+06	1.13481e+07	1.57286e+07	1.3067e+07	9.96181e+06	19	19	19	19	8	19	18	21	19	20	High	High	High	High	Peak Found	High	High	High	High	High	24	93.81	138.67
High	Q9NPA0	ER membrane protein complex subunit 7 OS=Homo sapiens OX=9606 GN=EMC7 PE=1 SV=1	EMC7	ENSG00000134153.9	8	2	1.18409	0.0435638	2.3315e+06	2.72733e+06	2.61069e+06	2.287e+06	2.02935e+06	1.96792e+06	2.14447e+06	2.38161e+06	2.07181e+06	2.2533e+06	2.26169e+06	1.89064e+06		827882	1.4585e+06	2.14447e+06	2.06956e+06	1.3344e+06	2	2	2	2		2	2	2	2	2	High	High	High	High	Not Found	High	Peak Found	Peak Found	Peak Found	High	16	8.421	1.83
High	Q08722	Leukocyte surface antigen CD47 OS=Homo sapiens OX=9606 GN=CD47 PE=1 SV=1	CD47	ENSG00000196776.14	12	4	1.16622	0.0438019	4.48402e+06	4.95458e+06	5.07298e+06	4.66104e+06	3.11897e+06	4.18882e+06	4.49454e+06	4.05632e+06	3.98459e+06	4.09344e+06	4.39481e+06	3.85325e+06	88789	1.2724e+06	3.10449e+06	4.49454e+06	3.52485e+06	2.11854e+06	4	4	4	4	4	4	4	4	4	4	High	High	Peak Found	High	Peak Found	High	High	High	High	High	12	10.521	1.75
High	P32969	60S ribosomal protein L9 OS=Homo sapiens OX=9606 GN=RPL9 PE=1 SV=1	RPL9	ENSG00000163682.15	297	8	0.817361	0.0442553	4.92634e+07	5.04353e+07	4.71427e+07	5.01535e+07	6.96768e+07	4.93469e+07	5.8932e+07	6.26995e+07	4.37765e+07	4.16692e+07	4.08406e+07	4.14615e+07	1.47655e+06	2.84249e+07	3.65729e+07	5.8932e+07	54484470	3.25476e+07	12	12	12	11	9	12	11	12	12	12	High	High	High	High	Peak Found	High	High	High	High	High	61	107.696	486.42
High	O14672	Disintegrin and metalloproteinase domain-containing protein 10 OS=Homo sapiens OX=9606 GN=ADAM10 PE=1 SV=1	ADAM10	ENSG00000137845.14	8	2	1.24252	0.0442951	321227	426445	393409	361702	251715	341956	318295	289429	285449	352326	340817	299016		102688	253436	318295	251508	185939	1	1	1	1		1	1	1	1	1	High	High	High	High	Not Found	Peak Found	Peak Found	High	High	Peak Found	4	6.749	0
High	P04920	Anion exchange protein 2 OS=Homo sapiens OX=9606 GN=SLC4A2 PE=1 SV=4	SLC4A2	ENSG00000164889.13	25	6	1.17904	0.0443498	2.38583e+06	2.71148e+06	2.71254e+06	2.23536e+06	1.6355e+06	2.22248e+06	2.21861e+06	2.10464e+06	2.12009e+06	2.2402e+06	2.34992e+06	1.84796e+06	20630.7	667208	1.64716e+06	2.21861e+06	1.82889e+06	1.09454e+06	6	6	6	6	1	6	6	6	6	6	High	High	High	High	Peak Found	High	High	High	High	High	7	22.768	3.71
High	Q9Y3E5	Peptidyl-tRNA hydrolase 2, mitochondrial OS=Homo sapiens OX=9606 GN=PTRH2 PE=1 SV=1	PTRH2	ENSG00000141378.14	10	3	0.749888	0.0443565	455482	1.37396e+06	1.30158e+06	1.12811e+06	1.65465e+06	1.69452e+06	1.4953e+06	1.58542e+06	404750	1.13516e+06	1.12758e+06	932603	209226	675020	1.25587e+06	1.4953e+06	1.3777e+06	546668	1	2	2	2	1	2	2	2	2	2	Peak Found	High	High	High	Peak Found	High	High	High	Peak Found	High	31	13.262	6.41
High	Q96SQ9	Cytochrome P450 2S1 OS=Homo sapiens OX=9606 GN=CYP2S1 PE=1 SV=2	CYP2S1	ENSG00000167600.13	44	8	0.876154	0.0448517	3.95493e+06	4.91317e+06	4.61815e+06	4.11611e+06	4.81614e+06	5.05599e+06	5.26785e+06	4.91287e+06	3.51443e+06	4059225	4.00078e+06	3.40276e+06	39467.6	1.96477e+06	3.74719e+06	5.26785e+06	4.26918e+06	2.73485e+06	7	8	8	8	2	7	8	8	8	8	High	High	High	High	Peak Found	High	High	High	High	High	25	30.395	20.75
High	Q9Y365	START domain-containing protein 10 OS=Homo sapiens OX=9606 GN=STARD10 PE=1 SV=2	STARD10	ENSG00000214530.8	57	8	1.24185	0.0449743	7.45114e+06	9.40315e+06	8.81666e+06	9.34284e+06	7.66201e+06	6.96088e+06	6.29117e+06	8.05757e+06	6.62123e+06	7.76881e+06	7.63803e+06	7.72365e+06	5.14566e+06	3125749	5.15897e+06	6.29117e+06	7.00185e+06	4.65821e+06	8	8	8	9	2	10	8	7	9	8	High	High	High	High	Peak Found	High	High	High	High	High	38	43.948	42.73
High	Q96DI7	U5 small nuclear ribonucleoprotein 40 kDa protein OS=Homo sapiens OX=9606 GN=SNRNP40 PE=1 SV=1	SNRNP40	ENSG00000060688.12	38	7	0.860028	0.045017	2.29717e+06	2.34968e+06	2.41039e+06	2.18587e+06	3.06601e+06	2.36595e+06	2.81514e+06	2.588e+06	2.04131e+06	1.94129e+06	2.08817e+06	1.80704e+06		1.25079e+06	1.75349e+06	2.81514e+06	2.24892e+06	921072	4	4	4	4		4	4	4	4	4	High	High	High	High	Not Found	High	High	High	High	High	47	43.171	42.48
High	P02768	Serum albumin OS=Homo sapiens OX=9606 GN=ALB PE=1 SV=2	ALB	ENSG00000163631.16	751	4	1.58764	0.0456146	2.53607e+06	4.22952e+06	3.24163e+06	3.25409e+06	2.11536e+06	2.98535e+06	1774450	1.97608e+06	2.2536e+06	3.4944e+06	2.80828e+06	2.69013e+06	928304	862969	2.21256e+06	1774450	1.71717e+06	1.48832e+06	4	4	4	3	3	3	4	3	3	3	High	High	High	High	High	High	High	High	High	High	15	69.001	733.09
High	P53582	Methionine aminopeptidase 1 OS=Homo sapiens OX=9606 GN=METAP1 PE=1 SV=2	METAP1	ENSG00000164024.11	58	10	0.916886	0.0456983	7.17595e+06	7.45783e+06	8.28865e+06	8.08759e+06	8.37989e+06	8.57469e+06	8.91672e+06	8.19173e+06	6.3767e+06	6.1616e+06	7.1806e+06	6.68595e+06	134243	3.41861e+06	6.35503e+06	8.91672e+06	7.11843e+06	4.04968e+06	9	9	9	9	3	9	9	9	9	9	High	High	High	High	Peak Found	High	High	High	High	High	41	50.995	50.07
High	P43307	Translocon-associated protein subunit alpha OS=Homo sapiens OX=9606 GN=SSR1 PE=1 SV=3	SSR1	ENSG00000124783.12	54	4	1.15829	0.0457959	1.29147e+07	1.43501e+07	1.34742e+07	1.2784e+07	1.28168e+07	8.83207e+06	1.154e+07	1.12427e+07	1.14763e+07	1.18559e+07	1.1673e+07	1.05684e+07	144524	5.22866e+06	6.54578e+06	1.154e+07	9769690	3.8831e+06	3	3	3	3	2	3	3	3	3	3	High	High	High	High	Peak Found	High	High	High	High	High	20	22.369	15.02
High	Q9BUB7	Transmembrane protein 70, mitochondrial OS=Homo sapiens OX=9606 GN=TMEM70 PE=1 SV=2	TMEM70	ENSG00000175606.10	23	2	1.09419	0.0458365	981331	1.08214e+06	1.12037e+06	970897	970133	885444	937538	948312	872030	894055	970596	802633	27042.4	395770	656237	937538	824062	537244	2	2	2	2	1	2	2	2	2	2	High	High	High	High	Peak Found	High	High	High	High	Peak Found	13	10.792	10.8
High	Q01105	Protein SET OS=Homo sapiens OX=9606 GN=SET PE=1 SV=3	SET	ENSG00000119335.16	266	10	0.930606	0.0459255	1.11504e+08	1.25528e+08	1.19316e+08	1.2213e+08	1.28517e+08	1.23208e+08	1.30982e+08	1.30933e+08	9.90847e+07	1.03711e+08	1.03366e+08	1.00964e+08	1.02932e+06	5.24288e+07	9.1314e+07	1.30982e+08	1.13778e+08	1.41816e+07	12	13	13	13	8	13	13	12	13	10	High	High	High	High	Peak Found	High	High	High	High	High	51	123.908	383.47
High	Q96KB5	Lymphokine-activated killer T-cell-originated protein kinase OS=Homo sapiens OX=9606 GN=PBK PE=1 SV=3	PBK	ENSG00000168078.9	45	7	0.889728	0.0459641	6.18559e+06	7.12931e+06	7.10379e+06	5.94528e+06	7.55574e+06	7.06985e+06	7.86314e+06	7.38071e+06	5.49664e+06	5.89018e+06	6.15414e+06	4.91492e+06	57902.6	3.0824e+06	5.23974e+06	7.86314e+06	6.41367e+06	2.89086e+06	7	7	7	7	2	7	7	7	7	7	High	High	High	High	Peak Found	High	High	High	High	High	26	25.941	33.47
High	Q16880	2-hydroxyacylsphingosine 1-beta-galactosyltransferase OS=Homo sapiens OX=9606 GN=UGT8 PE=2 SV=2	UGT8	ENSG00000174607.10	15	4	0.741819	0.0459642	838940	930190	967257	810288	1.65085e+06	997774	1.10237e+06	1.28248e+06	745499	768516	837952	669859		673469	739488	1.10237e+06	1.11445e+06	758275	3	3	3	3		3	3	3	3	3	High	High	High	Peak Found	Not Found	High	High	High	High	High	9	15.136	0
High	Q8WVY7	Ubiquitin-like domain-containing CTD phosphatase 1 OS=Homo sapiens OX=9606 GN=UBLCP1 PE=1 SV=2	UBLCP1	ENSG00000164332.7	11	2	1.15029	0.0459679	904953	1.16103e+06	891064	950750	712540	766431	861540	846812	804160	959232	771944	785978		290684	568031	861540	735861	515346	2	2	2	2		2	2	2	2	2	High	High	High	High	Not Found	Peak Found	Peak Found	High	High	Peak Found	7	5.111	0
High	Q9UBF2	Coatomer subunit gamma-2 OS=Homo sapiens OX=9606 GN=COPG2 PE=1 SV=1	COPG2	ENSG00000158623.14	68	7	0.636126	0.0460079	1.56125e+06	1.70739e+06	1.16144e+06	1.27348e+06	3.50276e+06	2.30301e+06	2.15323e+06	1.74316e+06	1.38736e+06	1.41063e+06	1.00618e+06	1.05278e+06		1.42897e+06	1.70685e+06	2.15323e+06	1.51477e+06	1.86351e+06	7	7	6	6		7	7	6	6	7	High	High	High	High	Not Found	High	High	High	High	High	16	42.455	42.99
High	P45974	Ubiquitin carboxyl-terminal hydrolase 5 OS=Homo sapiens OX=9606 GN=USP5 PE=1 SV=2	USP5	ENSG00000111667.13	256	27	1.14737	0.0460583	2.81303e+07	3.5305e+07	3.17559e+07	3.24274e+07	2.92332e+07	2.75118e+07	2.84277e+07	2.49049e+07	2.49971e+07	2.91687e+07	2.75107e+07	2.68075e+07	582172	1.19258e+07	2.039e+07	2.84277e+07	2.16418e+07	1.10828e+07	23	25	25	25	13	23	23	25	24	23	High	High	High	High	Peak Found	High	High	High	High	High	46	151.659	260.69
High	O15027	Protein transport protein Sec16A OS=Homo sapiens OX=9606 GN=SEC16A PE=1 SV=4			48	12	1.10026	0.0464425	4.16528e+06	4.72543e+06	4.29993e+06	4.41752e+06	3.87457e+06	4.27893e+06	3.87074e+06	4.04853e+06	3.70135e+06	3.90412e+06	3.7251e+06	3.65193e+06	18066.4	1.58065e+06	3.17128e+06	3.87074e+06	3.51808e+06	1.73189e+06	11	11	11	11	1	11	11	11	11	9	High	High	High	High	Peak Found	High	High	High	High	High	7	34.588	1.76
High	Q9Y5K6	CD2-associated protein OS=Homo sapiens OX=9606 GN=CD2AP PE=1 SV=1	CD2AP	ENSG00000198087.7	52	11	1.26698	0.0466699	5.95244e+06	5.96134e+06	6.24167e+06	5.4336e+06	5.88425e+06	4.44358e+06	4.16313e+06	4.95975e+06	5.28946e+06	4.92522e+06	5.40727e+06	4.49191e+06		2.40051e+06	3.29331e+06	4.16313e+06	4.30991e+06	607162	11	11	11	10		11	11	10	11	6	High	High	High	High	Not Found	High	High	High	High	Peak Found	28	48.998	10.52
High	P08754	Guanine nucleotide-binding protein G(i) subunit alpha OS=Homo sapiens OX=9606 GN=GNAI3 PE=1 SV=3	GNAI3	ENSG00000065135.10	80	6	0.715093	0.0468352	2.81845e+06	4.11362e+06	3.34132e+06	2.7518e+06	4.64447e+06	4.13752e+06	4.47642e+06	3.62592e+06	2.50453e+06	3.39864e+06	2.89464e+06	2.27489e+06		1.89473e+06	3.06648e+06	4.47642e+06	3.15084e+06	2.56438e+06	5	5	5	4		6	4	5	4	5	High	High	High	High	Not Found	High	High	High	High	High	45	54.093	67.43
High	P33992	DNA replication licensing factor MCM5 OS=Homo sapiens OX=9606 GN=MCM5 PE=1 SV=5	MCM5	ENSG00000100297.15	238	29	0.890608	0.0473154	3.60519e+07	4.0317e+07	3.92126e+07	4.0333e+07	3.90942e+07	4.42218e+07	4.50762e+07	4.66758e+07	3.20364e+07	3.33096e+07	3.39705e+07	3.3343e+07	848362	1.59486e+07	3.27744e+07	4.50762e+07	4.05603e+07	2.74802e+07	28	28	27	29	14	28	30	27	30	30	High	High	High	High	Peak Found	High	High	High	High	High	53	130.606	144.45
High	Q7L2H7	Eukaryotic translation initiation factor 3 subunit M OS=Homo sapiens OX=9606 GN=EIF3M PE=1 SV=1	EIF3M	ENSG00000149100.12	142	15	0.830795	0.0476878	1.10907e+07	1.28703e+07	1.45514e+07	1.41194e+07	1.94244e+07	1.41842e+07	1.68775e+07	1.56091e+07	9.85545e+06	1.06334e+07	1.26061e+07	1.16724e+07	147293	7.92428e+06	1.05124e+07	1.68775e+07	1.3564e+07	9.94668e+06	14	14	15	15	5	16	16	15	15	15	High	High	High	High	Peak Found	High	High	High	High	High	62	110.178	145.67
High	Q9Y3A5	Ribosome maturation protein SBDS OS=Homo sapiens OX=9606 GN=SBDS PE=1 SV=4	SBDS	ENSG00000126524.9	45	6	0.914254	0.0479728	6.57733e+06	7.97069e+06	7.56108e+06	7.1546e+06	8.14308e+06	8.74844e+06	7.95275e+06	7.92444e+06	5.84475e+06	6.58532e+06	6.5503e+06	5.91465e+06	150971	3.322e+06	6.4838e+06	7.95275e+06	6.88617e+06	3.91489e+06	5	5	5	5	3	5	6	5	5	5	High	High	High	High	Peak Found	High	High	High	High	High	34	35.007	37.81
High	P60866	40S ribosomal protein S20 OS=Homo sapiens OX=9606 GN=RPS20 PE=1 SV=1	RPS20	ENSG00000008988.9	110	5	0.783427	0.0482747	4.43321e+07	4.99684e+07	5.02974e+07	5.34446e+07	4.91802e+07	6.94838e+07	6.09249e+07	6.70587e+07	3.93944e+07	4.12835e+07	4.35735e+07	4.41823e+07	2.085e+06	2.00632e+07	5.14971e+07	6.09249e+07	5.82725e+07	2.96305e+07	5	5	5	4	4	5	5	5	5	5	High	High	High	High	High	High	High	High	High	High	43	29.721	82.66
High	Q9NZB2	Constitutive coactivator of PPAR-gamma-like protein 1 OS=Homo sapiens OX=9606 GN=FAM120A PE=1 SV=2	FAM120A	ENSG00000048828.16	123	20	0.875776	0.0482792	1.15495e+07	1.26767e+07	1.29847e+07	1.23065e+07	1.24621e+07	1.53774e+07	1.46081e+07	1.39188e+07	1.02632e+07	1.04734e+07	1.12489e+07	1.01737e+07	147227	5.08397e+06	1.13968e+07	1.46081e+07	1.20952e+07	8.52998e+06	21	20	21	21	6	21	20	21	21	21	High	High	High	High	Peak Found	High	High	High	High	High	26	95.025	52.08
High	P17812	CTP synthase 1 OS=Homo sapiens OX=9606 GN=CTPS1 PE=1 SV=2	CTPS1	ENSG00000171793.13	129	14	0.897537	0.0483296	1.28538e+07	1.33313e+07	1.39371e+07	1.0722e+07	1.46753e+07	1.39465e+07	1.49426e+07	1.44991e+07	1.14221e+07	1.10142e+07	1.2074e+07	8.86376e+06	159492	5.98684e+06	1.03363e+07	1.49426e+07	1.25994e+07	8.17514e+06	13	13	13	12	4	13	13	13	13	13	High	High	High	High	Peak Found	High	High	High	High	High	37	72.724	60.55
High	Q8WUM4	Programmed cell death 6-interacting protein OS=Homo sapiens OX=9606 GN=PDCD6IP PE=1 SV=1	PDCD6IP	ENSG00000170248.13	286	31	0.916126	0.0488362	3.6487e+07	4.24108e+07	4.17414e+07	4.02699e+07	4.15874e+07	4.51655e+07	4.55694e+07	4.43541e+07	3.24231e+07	35039486	3.61613e+07	3.32908e+07	816210	1.69658e+07	3.34739e+07	4.55694e+07	3.85428e+07	2.46127e+07	30	30	31	31	17	30	29	30	30	28	High	High	High	High	Peak Found	High	High	High	High	High	52	163.213	177.75
High	O75694	Nuclear pore complex protein Nup155 OS=Homo sapiens OX=9606 GN=NUP155 PE=1 SV=1	NUP155	ENSG00000113569.15	101	16	0.902996	0.049134	7.22789e+06	7.51515e+06	7.41422e+06	7.66511e+06	9.32511e+06	7.6238e+06	8.08118e+06	8.45197e+06	6.42284e+06	6.20896e+06	6.42307e+06	6.33669e+06	10759.4	3.80422e+06	5.65029e+06	8.08118e+06	7.34458e+06	4.71145e+06	15	15	15	15	1	15	15	15	14	15	High	High	High	High	Peak Found	High	High	High	High	High	19	91.538	74.71
High	P17844	Probable ATP-dependent RNA helicase DDX5 OS=Homo sapiens OX=9606 GN=DDX5 PE=1 SV=1	DDX5	ENSG00000108654.13	697	21	0.913781	0.0492986	7.88224e+07	8.86691e+07	9.208e+07	8.11947e+07	9.09575e+07	9.3651e+07	9.7617e+07	9.22401e+07	7.00432e+07	7.32577e+07	7.97705e+07	6.7123e+07	2.26614e+06	3.71065e+07	6.94083e+07	9.7617e+07	8.01547e+07	4.07769e+07	24	24	24	23	14	25	25	24	24	23	High	High	High	High	High	High	High	High	High	High	58	184.898	683.84
High	O75643	U5 small nuclear ribonucleoprotein 200 kDa helicase OS=Homo sapiens OX=9606 GN=SNRNP200 PE=1 SV=2	SNRNP200	ENSG00000144028.14	539	60	0.885465	0.049316	4.22728e+07	4.80916e+07	4.89072e+07	4.61862e+07	6.184e+07	4.84339e+07	5.22554e+07	5.42173e+07	3.75644e+07	3.97329e+07	4.23692e+07	3.81818e+07	1.87144e+06	2.52279e+07	3.58962e+07	5.22554e+07	4.71136e+07	3.26971e+07	58	58	56	58	16	56	57	57	57	58	High	High	High	High	Peak Found	High	High	High	High	High	40	345.462	440.96
High	P04439	HLA class I histocompatibility antigen, A alpha chain OS=Homo sapiens OX=9606 GN=HLA-A PE=1 SV=2	HLA-A	ENSG00000206503.12	27	2	1.23017	0.0493741	1.55052e+06	2.03779e+06	1.96351e+06	1.72234e+06	1.64572e+06	1.53736e+06	1.45885e+06	1.4421e+06	1.37782e+06	1.68361e+06	1701019	1.42384e+06	54745.7	671378	1.1394e+06	1.45885e+06	1.25315e+06	1.02187e+06	2	2	2	2	1	2	2	2	2	2	High	High	High	High	Peak Found	High	Peak Found	High	High	High	23	29.908	39.7
High	Q9NSE4	Isoleucine--tRNA ligase, mitochondrial OS=Homo sapiens OX=9606 GN=IARS2 PE=1 SV=2	IARS2	ENSG00000067704.9	66	11	0.841702	0.0494117	5.32098e+06	5.45941e+06	6.38729e+06	5.48548e+06	6.86897e+06	6.16989e+06	6.01614e+06	6.83338e+06	4.72833e+06	4.51052e+06	5.53342e+06	4.5348e+06	179047	2.80222e+06	4.57274e+06	6.01614e+06	5.93806e+06	4.84401e+06	11	10	11	9	3	9	10	9	9	10	High	High	High	High	Peak Found	High	High	High	High	High	17	54.565	33.05
High	Q9P2J5	Leucine--tRNA ligase, cytoplasmic OS=Homo sapiens OX=9606 GN=LARS1 PE=1 SV=2	LARS	ENSG00000133706.17	189	26	0.893926	0.049589	2.5871e+07	2.89821e+07	2.93574e+07	3.05914e+07	2.93704e+07	3.23906e+07	32871457	3.40824e+07	2.29895e+07	2.39448e+07	2.54328e+07	2.52897e+07	530264	1.19818e+07	2.40059e+07	32871457	2.96168e+07	1.55725e+07	19	22	20	22	11	20	21	22	23	21	High	High	High	High	Peak Found	High	High	High	High	High	33	121.241	128.55
High	Q07020	60S ribosomal protein L18 OS=Homo sapiens OX=9606 GN=RPL18 PE=1 SV=2	RPL18	ENSG00000063177.12	158	5	0.814976	0.0495908	5.70441e+07	6.05595e+07	6.38733e+07	6.64474e+07	6.12708e+07	8.21482e+07	7.63663e+07	7.63165e+07	5.06906e+07	5.00338e+07	5.53346e+07	5.49315e+07	2.60463e+06	2.49957e+07	6.08832e+07	7.63663e+07	6.63173e+07	5.50064e+07	4	5	4	5	5	4	4	4	4	5	High	High	High	High	High	High	High	High	High	High	31	33.322	248.79
High	Q9NR30	Nucleolar RNA helicase 2 OS=Homo sapiens OX=9606 GN=DDX21 PE=1 SV=5	DDX21	ENSG00000165732.12	459	30	0.835839	0.0497827	5.46525e+07	6.46203e+07	7.20312e+07	5.63888e+07	7.51837e+07	7.67509e+07	6.9592e+07	6.9546e+07	4.85653e+07	5.33888e+07	6.24019e+07	4.66162e+07	1.95469e+06	3.06715e+07	5.6883e+07	6.9592e+07	6.04339e+07	4.08418e+07	30	28	29	29	24	30	29	30	30	30	High	High	High	High	High	High	High	High	High	High	52	191.229	412.32
High	Q96HE7	ERO1-like protein alpha OS=Homo sapiens OX=9606 GN=ERO1A PE=1 SV=2	ERO1L; ERO1A	ENSG00000197930.12	83	10	0.916746	0.0503432	5.92078e+06	7.64478e+06	7.33014e+06	7.66169e+06	8.34426e+06	7.98355e+06	8.21818e+06	8.11669e+06	5.26132e+06	6.31606e+06	6.35023e+06	6.33386e+06	67793.1	3.40407e+06	5.91692e+06	8.21818e+06	7.05322e+06	4.99541e+06	9	10	10	10	3	10	10	10	10	10	High	High	High	High	Peak Found	High	High	High	High	High	34	54.217	71.5
High	Q13153	Serine/threonine-protein kinase PAK 1 OS=Homo sapiens OX=9606 GN=PAK1 PE=1 SV=2	PAK1	ENSG00000149269.9	34	2	2.12576	0.0505545	631883	436217	764462	740794	609892	316957	328780	261173	561504	360399	662266	612409		248808	234909	328780	226953		2	1	2	2		2	1	1	1		Peak Found	High	High	High	Not Found	Peak Found	High	Peak Found	High	Not Found	14	28.55	18.99
High	P29323	Ephrin type-B receptor 2 OS=Homo sapiens OX=9606 GN=EPHB2 PE=1 SV=5	EPHB2	ENSG00000133216.16	100	14	1.30271	0.0507484	5.86221e+06	7.05481e+06	6.7275e+06	7.49907e+06	6.62894e+06	4.65399e+06	5.20783e+06	5.37189e+06	5.20928e+06	5.82863e+06	5.82815e+06	6.19942e+06	42159	2.7043e+06	3.44925e+06	5.20783e+06	4.66805e+06	3.58661e+06	12	12	12	13	2	12	11	12	12	13	High	High	High	High	Peak Found	High	High	High	High	High	22	75.969	49.26
High	Q9NQW7	Xaa-Pro aminopeptidase 1 OS=Homo sapiens OX=9606 GN=XPNPEP1 PE=1 SV=3	XPNPEP1		133	16	0.900196	0.0512344	9.48218e+06	1.09348e+07	1.03529e+07	9.74437e+06	1.33584e+07	1.10866e+07	1.11064e+07	1.12191e+07	8.42605e+06	9.03421e+06	8.96893e+06	8.0556e+06	96410.8	5.44961e+06	8.21673e+06	1.11064e+07	9.74913e+06	6.69425e+06	15	15	14	15	3	16	16	15	15	15	High	High	High	High	Peak Found	High	High	High	High	High	43	82.532	103.96
High	P42285	Exosome RNA helicase MTR4 OS=Homo sapiens OX=9606 GN=MTREX PE=1 SV=3	SKIV2L2	ENSG00000039123.15	125	20	0.900734	0.0512818	8.52995e+06	1.00026e+07	9.78995e+06	9.3557e+06	1.18146e+07	9.77153e+06	1.05818e+07	1.06738e+07	7.57989e+06	8.26407e+06	8.4812e+06	7.73429e+06	165302	4.81982e+06	7.24206e+06	1.05818e+07	9.27533e+06	6.16717e+06	19	19	18	19	3	19	18	19	19	18	High	High	High	High	Peak Found	High	High	High	High	High	29	89.18	40.3
High	Q8WU90	Zinc finger CCCH domain-containing protein 15 OS=Homo sapiens OX=9606 GN=ZC3H15 PE=1 SV=1	ZC3H15	ENSG00000065548.17	74	7	0.706182	0.0514851	3.40504e+06	4.42316e+06	3.3517e+06	3.30389e+06	5.36474e+06	4.91095e+06	3.75087e+06	4.65705e+06	3.02578e+06	3.65438e+06	2.90364e+06	2.7313e+06	28860.4	2.18857e+06	3.63969e+06	3.75087e+06	4.04687e+06	869160	5	7	5	5	2	7	7	5	6	4	High	High	High	High	Peak Found	High	High	High	High	High	20	28.193	77.91
High	P52735	Guanine nucleotide exchange factor VAV2 OS=Homo sapiens OX=9606 GN=VAV2 PE=1 SV=2	VAV2	ENSG00000160293.16	28	4	1.60975	0.0515289	1.72188e+06	1.77976e+06	1.75008e+06	1.02778e+06	984794	669545	1.17203e+06	1.27464e+06	1.5301e+06	1.47042e+06	1.51612e+06	849661	30586	401751	496226	1.17203e+06	1.10763e+06	714773	4	4	4	3	2	3	3	4	4	4	High	High	High	High	Peak Found	High	High	High	High	High	7	16.6	13.37
High	P62318	Small nuclear ribonucleoprotein Sm D3 OS=Homo sapiens OX=9606 GN=SNRPD3 PE=1 SV=1	SNRPD3	ENSG00000100028.11	63	3	0.820645	0.0515405	5.67409e+06	6.34975e+06	7.98078e+06	7.16016e+06	7.5833e+06	7.81401e+06	8.64853e+06	8.69971e+06	5.04211e+06	5.24611e+06	6.91389e+06	5.91925e+06	214923	3.09364e+06	5.79126e+06	8.64853e+06	7.55986e+06	4.90143e+06	4	4	4	4	2	4	4	4	4	4	High	High	High	High	Peak Found	High	High	High	High	High	32	24.219	30.84
High	O95155	Ubiquitin conjugation factor E4 B OS=Homo sapiens OX=9606 GN=UBE4B PE=1 SV=1	UBE4B	ENSG00000130939.18	8	4	0.869191	0.0516594	500593	819432	839486	799155	897638	914241	947934	1.1208e+06	444837	677008	727261	660655		366195	677579	947934	973948	543146	3	3	3	3		3	3	3	3	3	High	Peak Found	High	High	Not Found	High	High	High	Peak Found	High	5	17.311	2.51
High	P31942	Heterogeneous nuclear ribonucleoprotein H3 OS=Homo sapiens OX=9606 GN=HNRNPH3 PE=1 SV=2	HNRNPH3	ENSG00000096746.17	60	5	1.22163	0.0518615	5.47243e+06	5.9484e+06	6.4216e+06	6.39624e+06	4.92817e+06	5.17685e+06	5.76504e+06	3.766e+06	4.86291e+06	4.91453e+06	5.56314e+06	5.28772e+06	67546.2	2.01047e+06	3.83677e+06	5.76504e+06	3.27257e+06	3.60506e+06	5	5	5	5	3	4	5	5	4	5	High	High	High	High	Peak Found	High	High	High	High	High	21	30.204	48.81
High	P51665	26S proteasome non-ATPase regulatory subunit 7 OS=Homo sapiens OX=9606 GN=PSMD7 PE=1 SV=2	PSMD7	ENSG00000103035.10	109	11	0.925812	0.0522871	1.82703e+07	2.12883e+07	2.10517e+07	1.9845e+07	2.11305e+07	2.23049e+07	2.19626e+07	2.22113e+07	1.62354e+07	1.75882e+07	1.82375e+07	1.64057e+07	298698	8.62027e+06	1.6531e+07	2.19626e+07	1.93012e+07	1.3922e+07	11	11	11	11	5	11	10	11	10	10	High	High	High	High	Peak Found	High	High	High	High	High	56	78.769	104.48
High	P22314	Ubiquitin-like modifier-activating enzyme 1 OS=Homo sapiens OX=9606 GN=UBA1 PE=1 SV=3	UBA1	ENSG00000130985.16	653	42	1.11159	0.0524974	1.255e+08	1.4824e+08	1.37897e+08	1.37035e+08	1.30934e+08	1.21818e+08	1.25513e+08	1.19639e+08	1.11522e+08	1.22475e+08	1.19462e+08	1.13286e+08	2.66615e+06	5.34151e+07	9.0284e+07	1.25513e+08	1.03964e+08	7.19265e+07	45	45	45	45	27	45	44	43	43	44	High	High	High	High	High	High	High	High	High	High	61	345.499	773.37
High	O75940	Survival of motor neuron-related-splicing factor 30 OS=Homo sapiens OX=9606 GN=SMNDC1 PE=1 SV=1	SMNDC1	ENSG00000119953.12	15	3	0.601374	0.0525979	1.23478e+06	479655	1.14153e+06	435859	1.25594e+06	1.22235e+06	1.54529e+06	1.43988e+06	1.09725e+06	396287	988931	360321		512364	905933	1.54529e+06	1.25122e+06		2	1	2	1		2	2	2	2		High	High	High	High	Not Found	High	High	High	High	Not Found	21	15.204	7.5
High	P49755	Transmembrane emp24 domain-containing protein 10 OS=Homo sapiens OX=9606 GN=TMED10 PE=1 SV=2	TMED10	ENSG00000170348.8	79	6	0.822436	0.053039	1.45162e+07	1.25547e+07	1.24481e+07	1.5907e+07	1.48361e+07	1.66716e+07	1.63836e+07	1.65318e+07	12899344	1.03726e+07	1.0784e+07	1.31502e+07	244318	6.05243e+06	1.2356e+07	1.63836e+07	1.43658e+07	9.70102e+06	6	5	5	6	3	6	6	6	6	6	High	High	High	High	High	High	High	High	High	High	35	44.382	103.48
High	O00170	AH receptor-interacting protein OS=Homo sapiens OX=9606 GN=AIP PE=1 SV=2	AIP		34	6	1.23166	0.0532135	4.11969e+06	5.1239e+06	4.83719e+06	4.50409e+06	3.566e+06	4.53239e+06	3.77522e+06	3.80907e+06	3.66084e+06	4.23333e+06	4.19054e+06	3.7235e+06	41722.7	1.45476e+06	3.35912e+06	3.77522e+06	3.31e+06	2.37192e+06	6	6	6	6	2	6	6	6	6	6	High	High	High	High	Peak Found	High	High	High	High	High	26	29.769	19.84
High	Q9UKY7	Protein CDV3 homolog OS=Homo sapiens OX=9606 GN=CDV3 PE=1 SV=1	CDV3	ENSG00000091527.15	9	3	0.751453	0.053462	1.19635e+06	685943	1.15136e+06	1.29972e+06	1.85993e+06	1.32983e+06	1.7944e+06	1.29117e+06	1063102	566721	997445	1.07447e+06		758766	985591	1.7944e+06	1.122e+06		3	2	3	3		3	3	3	3		High	Peak Found	Peak Found	High	Not Found	High	High	High	High	Not Found	25	7.281	0
High	P62750	60S ribosomal protein L23a OS=Homo sapiens OX=9606 GN=RPL23A PE=1 SV=1	RPL23A	ENSG00000198242.13	162	7	0.855043	0.0536046	8.82995e+07	9.61088e+07	9.68815e+07	9.83799e+07	9.32968e+07	1.14989e+08	1.10719e+08	1.1878e+08	7.84647e+07	7.94044e+07	8.39301e+07	8.13299e+07	1.72891e+06	3.80608e+07	8.52228e+07	1.10719e+08	1.03217e+08	3.35357e+07	8	8	7	8	6	7	8	8	8	8	High	High	High	High	High	High	High	High	High	High	42	47.507	201.7
High	P07237	Protein disulfide-isomerase OS=Homo sapiens OX=9606 GN=P4HB PE=1 SV=3	P4HB	ENSG00000185624.14	431	21	0.933466	0.0537367	8.44117e+07	9.60923e+07	9.30619e+07	8.95984e+07	1.04335e+08	9.45401e+07	9.90755e+07	9.66042e+07	7.50099e+07	7.93907e+07	8.06211e+07	7.40703e+07	1.11706e+06	4.25637e+07	7.00673e+07	9.90755e+07	8.39469e+07	2.03969e+07	22	22	22	22	18	22	22	22	22	21	High	High	High	High	High	High	High	High	High	High	49	146.755	428.4
High	P55039	Developmentally-regulated GTP-binding protein 2 OS=Homo sapiens OX=9606 GN=DRG2 PE=1 SV=1	DRG2	ENSG00000108591.9	37	7	0.855409	0.0538341	1.59762e+06	1.94906e+06	2.07637e+06	1.7522e+06	2.17252e+06	2.15437e+06	1.96567e+06	2.24179e+06	1.41967e+06	1.6103e+06	1.7988e+06	1.44853e+06	32963.9	886289	1.59669e+06	1.96567e+06	1.94806e+06	1.10209e+06	4	6	6	5	1	5	6	5	6	4	High	High	High	High	Peak Found	High	High	High	High	High	32	22.507	8.8
High	Q9NSB4	Keratin, type II cuticular Hb2 OS=Homo sapiens OX=9606 GN=KRT82 PE=1 SV=3	KRT82	ENSG00000161850.2	63	4	1.28763	0.0543226	7.33886e+07	5.21503e+07	5.89384e+07	7.57963e+07	4.81898e+07	5.23016e+07	5.04664e+07	5.37843e+07	6.52145e+07	4.30862e+07	5.10593e+07	62660245	8.8741e+06	1.96592e+07	3.87627e+07	5.04664e+07	4.67374e+07	3.07588e+07	1	1	1	1	1	1	1	1	4	1	High	High	High	High	High	High	Peak Found	High	High	High	15	30.119	79.36
High	Q9Y4W2	Ribosomal biogenesis protein LAS1L OS=Homo sapiens OX=9606 GN=LAS1L PE=1 SV=2	LAS1L	ENSG00000001497.16	18	4	0.888011	0.0546397	1.08316e+06	1.29363e+06	1.26035e+06	1.09626e+06	1.31765e+06	1.44834e+06	1.33616e+06	1.26648e+06	962516	1.06878e+06	1.09186e+06	906272		537539	1.07342e+06	1.33616e+06	1.10054e+06	846069	4	4	4	4		4	4	4	4	4	High	High	High	High	Not Found	Peak Found	High	High	High	High	9	14.849	4.29
High	Q9BZE1	39S ribosomal protein L37, mitochondrial OS=Homo sapiens OX=9606 GN=MRPL37 PE=1 SV=2	MRPL37	ENSG00000116221.15	80	9	1.13664	0.0547582	4.76539e+06	5.47099e+06	5.48783e+06	5.4411e+06	4.61472e+06	4.94794e+06	4.65235e+06	5.01706e+06	4.23462e+06	4.52009e+06	4.7542e+06	4.49812e+06	89963.8	1.8826e+06	3.66711e+06	4.65235e+06	4.35972e+06	2.90639e+06	9	9	9	9	4	9	9	8	9	9	High	High	High	High	Peak Found	High	High	High	High	High	32	46.705	34.23
High	Q96FQ6	Protein S100-A16 OS=Homo sapiens OX=9606 GN=S100A16 PE=1 SV=1	S100A16	ENSG00000188643.10	32	4	0.700448	0.0549124	4.68894e+06	3.13773e+06	3.66973e+06	3.7458e+06	7.71848e+06	4.55592e+06	5.90067e+06	4.68617e+06	4.16668e+06	2592369	3.17915e+06	3.09663e+06	153845	3.14878e+06	3.37657e+06	5.90067e+06	4.07218e+06	3.96751e+06	4	4	4	4	3	4	4	4	4	4	High	High	High	High	Peak Found	High	High	High	High	High	51	21.279	25.05
High	Q9UJW0	Dynactin subunit 4 OS=Homo sapiens OX=9606 GN=DCTN4 PE=1 SV=1	DCTN4	ENSG00000132912.12	10	2	0.826532	0.0553259	546441	741367	643338	556778	720024	812810	731965	708454	485578	612512	557335	460284		293737	602405	731965	615631	308938	2	2	2	2		2	2	2	2	2	High	Peak Found	High	High	Not Found	Peak Found	High	Peak Found	High	High	6	7.226	1.91
High	Q13155	Aminoacyl tRNA synthase complex-interacting multifunctional protein 2 OS=Homo sapiens OX=9606 GN=AIMP2 PE=1 SV=2	AIMP2	ENSG00000106305.9	75	7	0.954477	0.0553851	9.75612e+06	1.08147e+07	1.08597e+07	1.09897e+07	1.10244e+07	1.13345e+07	1.13736e+07	1.16751e+07	8.66948e+06	8.935e+06	9.40798e+06	9.0851e+06	213806	4.49747e+06	8.40044e+06	1.13736e+07	1.01454e+07	6.11364e+06	7	7	7	7	4	7	7	7	7	7	High	High	High	High	Peak Found	High	High	High	High	High	29	34.574	64.26
High	O94925	Glutaminase kidney isoform, mitochondrial OS=Homo sapiens OX=9606 GN=GLS PE=1 SV=1	GLS	ENSG00000115419.12	112	14	0.916161	0.0556011	1.0114e+07	1.17766e+07	1.15236e+07	1.08055e+07	1.2381e+07	1.14871e+07	1.22545e+07	1.2118e+07	8.9875e+06	9.72977e+06	9.98314e+06	8.93281e+06	145376	5.05089e+06	8.5135e+06	1.22545e+07	1.05303e+07	6.20421e+06	14	14	14	14	5	14	14	14	14	14	High	High	High	High	Peak Found	High	High	High	High	High	33	63.741	96.87
High	O75347	Tubulin-specific chaperone A OS=Homo sapiens OX=9606 GN=TBCA PE=1 SV=3	TBCA	ENSG00000171530.13	8	2	0.601573	0.0558387	513470	1.17371e+06	1.47883e+06	665128	1.59486e+06	1.46185e+06	2.08243e+06	1.32396e+06	456279	969708	1.28114e+06	549856		650632	1.08343e+06	2.08243e+06	1.15049e+06		1	2	2	1		2	2	2	2		Peak Found	High	High	Peak Found	Not Found	High	High	High	High	Not Found	18	5.194	5.39
High	Q9BRX8	Peroxiredoxin-like 2A OS=Homo sapiens OX=9606 GN=PRXL2A PE=1 SV=3	FAM213A	ENSG00000122378.13	12	3	1.12084	0.0559426	1.88537e+06	2.03257e+06	2.06369e+06	1.88908e+06	1.95496e+06	1.66516e+06	1.79278e+06	1.70605e+06	1.67538e+06	1.67929e+06	1.78781e+06	1.56169e+06	96558.6	797536	1.23411e+06	1.79278e+06	1.48252e+06	1.02966e+06	3	3	3	3	2	3	3	3	3	3	High	High	High	High	Peak Found	Peak Found	High	Peak Found	Peak Found	High	17	13.45	12.41
High	Q12846	Syntaxin-4 OS=Homo sapiens OX=9606 GN=STX4 PE=1 SV=2	STX4	ENSG00000103496.14	23	4	1.17753	0.0561414	2.38213e+06	2.64501e+06	2.78558e+06	2.89722e+06	2.36271e+06	2.58073e+06	2.17765e+06	2.24912e+06	2.11681e+06	2.18529e+06	2.41319e+06	2.39511e+06	311365	963878	1.91268e+06	2.17765e+06	1.95443e+06	1.52436e+06	4	4	4	4	2	4	3	4	3	5	High	High	High	High	Peak Found	High	High	High	High	High	21	15.668	6.74
High	Q00341	Vigilin OS=Homo sapiens OX=9606 GN=HDLBP PE=1 SV=2	HDLBP		196	26	0.924185	0.0562959	2.13211e+07	2.44432e+07	2.59268e+07	2.54845e+07	3.12648e+07	2.72449e+07	2.63764e+07	2.67786e+07	1.89464e+07	2.01948e+07	2.24609e+07	2.10678e+07	288954	1.27546e+07	2.01922e+07	2.63764e+07	2.327e+07	1.51001e+07	25	25	24	25	9	25	24	24	24	23	High	High	High	High	Peak Found	High	High	High	High	High	30	114.721	199.25
High	Q5T8D3	Acyl-CoA-binding domain-containing protein 5 OS=Homo sapiens OX=9606 GN=ACBD5 PE=1 SV=1	ACBD5	ENSG00000107897.18	6	2	1.20905	0.0563074	683509	792489	747044	861364	592319	733929	681022	560027	607379	654748	647177	712083		241639	543943	681022	486651	260774	2	2	2	2		2	2	2	2	1	Peak Found	Peak Found	High	High	Not Found	Peak Found	High	Peak Found	High	High	6	7.321	0
High	Q01081	Splicing factor U2AF 35 kDa subunit OS=Homo sapiens OX=9606 GN=U2AF1 PE=1 SV=3	U2AF1; LOC102724594; U2AF1L5	ENSG00000160201.11; ENSG00000275895.6	85	6	0.867002	0.0563309	1.43151e+07	1.6327e+07	1.60833e+07	1.4564e+07	2.06774e+07	1.66847e+07	1.86639e+07	1.61447e+07	1.27207e+07	1.34893e+07	1.39332e+07	1.20399e+07	414761	8.43545e+06	1.23656e+07	1.86639e+07	1.40294e+07	5.20826e+06	7	8	7	7	5	8	7	8	7	7	High	High	High	High	Peak Found	High	High	High	High	High	29	39.847	72.55
High	Q15459	Splicing factor 3A subunit 1 OS=Homo sapiens OX=9606 GN=SF3A1 PE=1 SV=1	SF3A1	ENSG00000099995.18	130	20	0.913955	0.057053	2.06989e+07	2.45564e+07	2.30554e+07	2.20627e+07	2.73655e+07	2.4027e+07	2.49152e+07	2.44505e+07	1.83935e+07	2.02883e+07	1.99733e+07	1.8239e+07	374258	1.11639e+07	1.78074e+07	2.49152e+07	2.12469e+07	9.01912e+06	20	20	20	20	11	19	20	20	19	19	High	High	High	High	Peak Found	High	High	High	High	High	30	75.953	87.72
High	P55884	Eukaryotic translation initiation factor 3 subunit B OS=Homo sapiens OX=9606 GN=EIF3B PE=1 SV=3	EIF3B	ENSG00000106263.17	461	29	0.887216	0.0575414	5.12111e+07	5.71398e+07	6.06067e+07	5.45751e+07	6.34022e+07	5.71422e+07	6.25141e+07	6.52378e+07	4.55072e+07	4.72085e+07	5.25047e+07	4.51168e+07	1.0923e+06	2.58652e+07	4.23503e+07	6.25141e+07	5.66902e+07	3.74189e+07	31	31	31	30	16	32	30	31	31	31	High	High	High	High	Peak Found	High	High	High	High	High	56	190.473	422.88
High	Q9Y5Q8	General transcription factor 3C polypeptide 5 OS=Homo sapiens OX=9606 GN=GTF3C5 PE=1 SV=2	GTF3C5	ENSG00000148308.17	5	2	0.83503	0.0576323	411742	652847	590044	614768	724565	781278	627795	718272	365882	539377	511165	508224	44857.6	295589	579035	627795	624162	424819	2	2	2	2	1	2	2	2	2	2	Peak Found	Peak Found	Peak Found	High	Peak Found	Peak Found	High	Peak Found	High	High	7	11.313	5.59
High	P43686	26S proteasome regulatory subunit 6B OS=Homo sapiens OX=9606 GN=PSMC4 PE=1 SV=2	PSMC4	ENSG00000281221.2; ENSG00000013275.7	131	17	0.868272	0.0576909	1.97248e+07	2.34917e+07	2.35849e+07	2.2721e+07	3.22675e+07	2.38201e+07	2.83392e+07	2.48846e+07	1.75278e+07	1.94087e+07	2.0432e+07	1.87833e+07	349354	1.31636e+07	1.7654e+07	2.83392e+07	2.16242e+07	1.49897e+07	16	18	17	19	8	19	19	19	18	15	High	High	High	High	Peak Found	High	High	High	High	High	61	122.031	126.03
High	Q9NX58	Cell growth-regulating nucleolar protein OS=Homo sapiens OX=9606 GN=LYAR PE=1 SV=2	LYAR		47	7	0.833341	0.0579545	5.21325e+06	6.10836e+06	5.12999e+06	5.63694e+06	8.09976e+06	5.90416e+06	6.3074e+06	6.7127e+06	4.6326e+06	5.04668e+06	4.4442e+06	4.66001e+06	41814.2	3.30433e+06	4.3758e+06	6.3074e+06	5.83319e+06	1.92759e+06	7	7	6	7	2	7	7	7	7	7	High	High	High	High	Peak Found	High	High	High	High	High	30	38.877	45.5
High	Q9H7E9	UPF0488 protein C8orf33 OS=Homo sapiens OX=9606 GN=C8orf33 PE=1 SV=1	C8orf33	ENSG00000182307.12	6	3	0.779248	0.0580018	1.44389e+06	1.11741e+06	1.50585e+06	1.10962e+06	1.37617e+06	1.6249e+06	1.74669e+06	1.66199e+06	1.28307e+06	923195	1.30454e+06	917318		561414	1.20427e+06	1.74669e+06	1.44423e+06	139918	3	2	3	2		3	3	3	3	2	High	Peak Found	High	Peak Found	Not Found	High	High	Peak Found	High	Peak Found	19	9.923	0
High	P29317	Ephrin type-A receptor 2 OS=Homo sapiens OX=9606 GN=EPHA2 PE=1 SV=2	EPHA2	ENSG00000142627.12	49	4	0.710065	0.0582107	983772	1.26727e+06	1.47004e+06	1.19392e+06	2.37305e+06	1.34021e+06	1.86635e+06	1.5998e+06	874200	1.04701e+06	1.27353e+06	987006		968094	993279	1.86635e+06	1.39019e+06	867843	4	4	4	4		4	4	4	4	4	High	High	High	High	Not Found	High	High	High	High	High	8	21.499	26.69
High	P62424	60S ribosomal protein L7a OS=Homo sapiens OX=9606 GN=RPL7A PE=1 SV=2	RPL7A	ENSG00000280858.2; ENSG00000148303.16	417	11	0.827394	0.0586573	1.26209e+08	1.33027e+08	1.38336e+08	1.31565e+08	1.28203e+08	1.73144e+08	1.59772e+08	1.60017e+08	1.12152e+08	1.09906e+08	1.19843e+08	1.08764e+08	3.14638e+06	5.23011e+07	1.28324e+08	1.59772e+08	1.39052e+08	7.69203e+07	12	12	12	12	10	12	12	12	12	11	High	High	High	High	High	High	High	High	High	High	50	86.977	532.81
High	A0AV96	RNA-binding protein 47 OS=Homo sapiens OX=9606 GN=RBM47 PE=1 SV=2	RBM47	ENSG00000163694.14	122	12	0.897154	0.0587671	1.2149e+07	1.4017e+07	1.41687e+07	1.40467e+07	1.37354e+07	1.53472e+07	1.62139e+07	1.59336e+07	1.07958e+07	1.15807e+07	1.22746e+07	1.16123e+07	159457	5.60343e+06	1.13744e+07	1.62139e+07	1.3846e+07	8.48704e+06	12	12	12	11	5	12	12	12	12	12	High	High	High	High	Peak Found	High	High	High	High	High	28	63.252	89.39
High	Q96I25	Splicing factor 45 OS=Homo sapiens OX=9606 GN=RBM17 PE=1 SV=1	RBM17	ENSG00000134453.15	38	5	0.925022	0.0591319	2.56931e+06	3.05073e+06	3.02593e+06	3.0125e+06	3.48374e+06	3.02774e+06	3.24111e+06	3.28677e+06	2.28314e+06	2.52049e+06	2.62142e+06	2.49041e+06		1.4212e+06	2.24398e+06	3.24111e+06	2.85613e+06	872503	5	5	5	5		5	4	5	5	4	High	High	High	High	Not Found	High	High	High	High	High	14	14.062	7.8
High	Q13505	Metaxin-1 OS=Homo sapiens OX=9606 GN=MTX1 PE=1 SV=3			26	4	1.21373	0.0595261	2.22204e+06	2.58369e+06	2.95226e+06	2.65254e+06	1.71919e+06	2.42947e+06	2.15755e+06	2.15661e+06	1.97455e+06	2.13462e+06	2.5576e+06	2.19283e+06		701351	1.80057e+06	2.15755e+06	1.87405e+06	1.25495e+06	4	4	4	4		4	4	4	4	4	High	High	High	High	Not Found	Peak Found	High	High	High	High	11	20.418	12.11
High	O76071	Probable cytosolic iron-sulfur protein assembly protein CIAO1 OS=Homo sapiens OX=9606 GN=CIAO1 PE=1 SV=1	CIAO1	ENSG00000144021.2	6	2	1.24047	0.0601882	704605	745854	941218	735158	548658	645254	737207	509402	626126	616219	815394	607750		223827	478223	737207	442659	354441	2	2	2	2		2	2	2	2	2	Peak Found	High	High	High	Not Found	Peak Found	Peak Found	High	High	Peak Found	8	5.291	0
High	P13473	Lysosome-associated membrane glycoprotein 2 OS=Homo sapiens OX=9606 GN=LAMP2 PE=1 SV=2	LAMP2	ENSG00000005893.15	22	4	1.18939	0.0602657	4.54435e+06	5.22743e+06	5.38219e+06	5.30653e+06	4.99907e+06	4.17696e+06	4.52489e+06	4.3317e+06	4.0382e+06	4.31886e+06	4.66269e+06	4.38686e+06	18931.5	2.03939e+06	3.0957e+06	4.52489e+06	3.76416e+06	1.91578e+06	4	4	4	4	1	4	4	4	4	4	High	High	High	High	Peak Found	High	High	High	High	High	12	17.244	14.13
High	P50583	Bis(5'-nucleosyl)-tetraphosphatase [asymmetrical] OS=Homo sapiens OX=9606 GN=NUDT2 PE=1 SV=3	NUDT2	ENSG00000164978.17	6	2	0.848439	0.0602747	597425	617235	686487	614677	716575	833908	735400	640362	530884	509955	594716	508149		292330	618041	735400	556461	568433	2	2	2	2		2	2	2	2	2	High	High	Peak Found	High	Not Found	High	Peak Found	Peak Found	High	High	16	4.613	0
High	P09651	Heterogeneous nuclear ribonucleoprotein A1 OS=Homo sapiens OX=9606 GN=HNRNPA1 PE=1 SV=5	HNRNPA1	ENSG00000135486.17	898	9	0.856172	0.0604202	1.51674e+08	1.57665e+08	1.70385e+08	1.5121e+08	2.06358e+08	1.62116e+08	1.89154e+08	1.72151e+08	1.3478e+08	1.30262e+08	1.47608e+08	1.25004e+08	1.89177e+06	8.41846e+07	1.20151e+08	1.89154e+08	1.49596e+08	3.47882e+07	13	13	13	13	11	13	13	13	13	13	High	High	High	High	High	High	High	High	High	High	35	129.083	1254.4
High	P30419	Glycylpeptide N-tetradecanoyltransferase 1 OS=Homo sapiens OX=9606 GN=NMT1 PE=1 SV=2	NMT1	ENSG00000136448.11	76	10	0.928073	0.0604478	9.0937e+06	1.13287e+07	1.07858e+07	1.0983e+07	1.25571e+07	1.15845e+07	1.18714e+07	1.136e+07	8.08085e+06	9.35967e+06	9.3439e+06	9.0796e+06	147992	5.12271e+06	8.58571e+06	1.18714e+07	9871599	6.38877e+06	9	10	10	10	4	9	10	10	9	10	High	High	High	High	Peak Found	High	High	High	High	High	30	49.757	57.08
High	P17931	Galectin-3 OS=Homo sapiens OX=9606 GN=LGALS3 PE=1 SV=5	LGALS3	ENSG00000131981.15	118	5	0.766247	0.0605137	2.90548e+07	3.03106e+07	3.45619e+07	2.73755e+07	3.06145e+07	4.19948e+07	4.17205e+07	3.57551e+07	2.58186e+07	2.50424e+07	2.99416e+07	2.26311e+07	1.07645e+06	1.24893e+07	31123926	4.17205e+07	3.10704e+07	2.94111e+07	5	5	5	5	4	5	5	5	5	4	High	High	High	High	High	High	High	High	High	High	23	26.693	129.94
High	Q96GM8	Target of EGR1 protein 1 OS=Homo sapiens OX=9606 GN=TOE1 PE=1 SV=1	TOE1	ENSG00000132773.11	18	4	0.82853	0.0607706	1.52125e+06	1.91606e+06	1.7097e+06	1.47088e+06	1.80407e+06	2.29978e+06	2.03651e+06	1.86311e+06	1.35181e+06	1.58303e+06	1.48114e+06	1.21596e+06		735979	1704455	2.03651e+06	1.619e+06	1.57718e+06	4	4	4	4		4	4	4	4	4	High	High	High	Peak Found	Not Found	High	High	High	High	High	14	17.299	6.95
High	Q96TA1	Protein Niban 2 OS=Homo sapiens OX=9606 GN=NIBAN2 PE=1 SV=3	FAM129B	ENSG00000136830.11	49	13	0.745318	0.0612677	4.26748e+06	4.26653e+06	5.09756e+06	5.89292e+06	8.4574e+06	5.58679e+06	5.71824e+06	6.84692e+06	3.79216e+06	3.52497e+06	4.4161e+06	4.87163e+06	67900.2	3.45023e+06	4.14058e+06	5.71824e+06	5.94982e+06	4.09715e+06	11	9	11	11	2	11	11	11	12	12	High	High	High	High	Peak Found	High	High	High	High	High	25	57.151	7.08
High	P35250	Replication factor C subunit 2 OS=Homo sapiens OX=9606 GN=RFC2 PE=1 SV=3	RFC2	ENSG00000049541.10	18	3	0.856282	0.0615431	1.42422e+06	1.7358e+06	1.29703e+06	1.71191e+06	1.68141e+06	1.91072e+06	1.83516e+06	1.82734e+06	1.26559e+06	1.43411e+06	1.12364e+06	1.41523e+06		685936	1.41611e+06	1.83516e+06	1.58792e+06	1.03606e+06	3	3	2	3		3	3	3	3	3	High	High	High	High	Not Found	High	High	High	High	High	11	10.633	9.93
High	Q6NXG1	Epithelial splicing regulatory protein 1 OS=Homo sapiens OX=9606 GN=ESRP1 PE=1 SV=2	ESRP1	ENSG00000104413.15	12	6	0.801279	0.0617405	1.09765e+06	992200	1.24771e+06	1.08528e+06	1.8137e+06	1.22736e+06	1.47774e+06	1.24656e+06	975391	819748	1.08091e+06	897194		739906	909640	1.47774e+06	1.08324e+06	659503	5	4	4	4		5	5	5	4	4	High	Peak Found	Peak Found	High	Not Found	High	Peak Found	High	High	High	16	17.729	0
High	Q9UI09	NADH dehydrogenase [ubiquinone] 1 alpha subcomplex subunit 12 OS=Homo sapiens OX=9606 GN=NDUFA12 PE=1 SV=1	NDUFA12	ENSG00000184752.12	10	2	1.10251	0.0619043	1.28656e+06	1.54297e+06	1.25604e+06	1.31697e+06	955161	1.19298e+06	1.16847e+06	1.24745e+06	1.14326e+06	1.27479e+06	1.08813e+06	1.08873e+06		389662	884160	1.16847e+06	1.08401e+06	541445	2	2	2	2		2	2	2	2	2	High	Peak Found	High	High	Not Found	High	Peak Found	High	High	High	20	8.682	3.81
High	P34949	Mannose-6-phosphate isomerase OS=Homo sapiens OX=9606 GN=MPI PE=1 SV=2	MPI	ENSG00000178802.17	17	3	1.08384	0.0619874	1.53908e+06	1.6288e+06	1.5396e+06	1.57737e+06	1.57895e+06	1.34813e+06	1.42131e+06	1.45454e+06	1.36766e+06	1.3457e+06	1.33379e+06	1.304e+06		644138	999154	1.42131e+06	1.26396e+06	619677	3	3	3	3		3	3	3	3	3	High	High	High	High	Not Found	High	High	High	High	High	11	13.407	2.11
High	Q13523	Serine/threonine-protein kinase PRP4 homolog OS=Homo sapiens OX=9606 GN=PRPF4B PE=1 SV=3	PRPF4B	ENSG00000112739.16	28	4	2.03857	0.0620194	1.15626e+06	2.13429e+06	2.0982e+06	2.11697e+06	1.72928e+06	949618	1.04086e+06	1.02686e+06	1.02748e+06	1.76334e+06	1.81771e+06	1.75009e+06		705466	703798	1.04086e+06	892319	486590	3	4	4	4		3	3	3	3	3	High	High	High	High	Not Found	High	High	High	High	High	4	16.929	12.16
High	Q96RS6	NudC domain-containing protein 1 OS=Homo sapiens OX=9606 GN=NUDCD1 PE=1 SV=2	NUDCD1	ENSG00000120526.10	32	8	1.12966	0.0621151	4.54755e+06	5.50338e+06	4.80679e+06	5.09521e+06	4.71221e+06	3.64661e+06	4.51175e+06	4.25373e+06	4.04104e+06	4.54685e+06	4.1642e+06	4.21217e+06	19981	1.92236e+06	2.70264e+06	4.51175e+06	3.6964e+06	2.59795e+06	8	8	8	8	1	8	7	8	8	8	High	High	High	High	Peak Found	High	High	High	High	High	22	28.266	6.34
High	Q86V81	THO complex subunit 4 OS=Homo sapiens OX=9606 GN=ALYREF PE=1 SV=3	ALYREF		164	7	0.944008	0.0622422	3.24606e+07	3.58485e+07	3.79029e+07	3.60652e+07	3.98235e+07	3.76459e+07	3.84949e+07	3.76842e+07	2.88451e+07	2.96178e+07	3.2836e+07	2.98148e+07	549954	1.62462e+07	2.79008e+07	3.84949e+07	3.27467e+07	6.9941e+06	8	8	8	8	3	8	8	8	8	7	High	High	High	High	Peak Found	High	High	High	High	High	47	93.515	244.2
High	Q14108	Lysosome membrane protein 2 OS=Homo sapiens OX=9606 GN=SCARB2 PE=1 SV=2	SCARB2	ENSG00000138760.9	42	8	1.3251	0.0623428	4.13376e+06	5.48013e+06	5.64535e+06	6.74855e+06	3.92826e+06	4.09254e+06	4.30339e+06	4.60542e+06	3.67334e+06	4.52764e+06	4.89066e+06	5.57897e+06	46561.3	1.60255e+06	3.03314e+06	4.30339e+06	4.00201e+06	2.68616e+06	6	7	7	8	2	7	7	7	7	7	High	High	High	High	Peak Found	High	High	High	High	High	26	41.141	32.33
High	O14880	Microsomal glutathione S-transferase 3 OS=Homo sapiens OX=9606 GN=MGST3 PE=1 SV=1	MGST3	ENSG00000143198.12	42	3	1.53619	0.0625431	3.78434e+06	4.59228e+06	4.93931e+06	4.22719e+06	2.41885e+06	1.93937e+06	3.32228e+06	4.40764e+06	3.36284e+06	3.79411e+06	4.27901e+06	3.49459e+06	141118	986780	1.43734e+06	3.32228e+06	3.83014e+06	2.10604e+06	4	4	4	5	2	4	3	4	4	5	High	High	High	High	Peak Found	High	High	High	High	High	32	34.845	44.34
High	Q8NE71	ATP-binding cassette sub-family F member 1 OS=Homo sapiens OX=9606 GN=ABCF1 PE=1 SV=2	ABCF1	ENSG00000225989.9; ENSG00000232169.9; ENSG00000204574.12; ENSG00000206490.11; ENSG00000236149.9; ENSG00000236342.8; ENSG00000231129.8	38	11	0.923512	0.0626142	6.11885e+06	6.98306e+06	7.04934e+06	6.6061e+06	7.96545e+06	7.04985e+06	7.66481e+06	6.99346e+06	5.43733e+06	5.76935e+06	6.10697e+06	5.46121e+06	140393	3.24954e+06	5.22492e+06	7.66481e+06	6.07716e+06	3.61627e+06	10	10	10	9	4	10	10	10	9	10	High	High	High	High	Peak Found	High	High	High	High	High	19	44.419	36.48
High	P10321	HLA class I histocompatibility antigen, C alpha chain OS=Homo sapiens OX=9606 GN=HLA-C PE=1 SV=3	HLA-C	ENSG00000204525.16	25	3	1.22699	0.0628307	3.08072e+06	3.54457e+06	3.86223e+06	3.59437e+06	1.49353e+06	3.03195e+06	3.06667e+06	2.78629e+06	2.73759e+06	2.9285e+06	3.34592e+06	2.97144e+06	39787.1	609293	2.24709e+06	3.06667e+06	2.42122e+06	1.91102e+06	3	3	3	3	2	2	3	3	3	3	High	High	High	High	Peak Found	High	Peak Found	High	High	Peak Found	22	31.848	39.88
High	Q9UN86	Ras GTPase-activating protein-binding protein 2 OS=Homo sapiens OX=9606 GN=G3BP2 PE=1 SV=2	G3BP2	ENSG00000138757.14	48	7	1.09736	0.0628763	1.28884e+07	1.40898e+07	1.35635e+07	1.28648e+07	1.3225e+07	1.21351e+07	1.197e+07	1.07758e+07	1.14529e+07	1.16409e+07	1.17503e+07	1.06353e+07	186771	5.3952e+06	8.99378e+06	1.197e+07	9.36391e+06	3.53255e+06	6	6	6	7	4	7	7	6	6	6	High	High	High	High	Peak Found	High	High	High	High	High	24	55.027	55.74
High	Q16540	39S ribosomal protein L23, mitochondrial OS=Homo sapiens OX=9606 GN=MRPL23 PE=1 SV=1	MRPL23	ENSG00000214026.10	31	3	1.18835	0.0634455	860029	1.03187e+06	1.00037e+06	940601	794187	940829	796087	837240	764238	852521	866635	777588		323992	697285	796087	727543	504227	2	2	2	2		2	2	2	2	2	High	High	High	High	Not Found	High	High	High	High	High	38	19.401	31.46
High	Q9NP72	Ras-related protein Rab-18 OS=Homo sapiens OX=9606 GN=RAB18 PE=1 SV=1	RAB18	ENSG00000099246.16	62	9	0.911793	0.0637366	5.05068e+06	6.16774e+06	6.00746e+06	5.5333e+06	6.08256e+06	6.15992e+06	6.49728e+06	6.53583e+06	4.48813e+06	5.09574e+06	5.20436e+06	4.57434e+06	63246.2	2.4814e+06	4.56535e+06	6.49728e+06	5.67949e+06	3.83388e+06	8	8	8	8	2	8	8	8	8	8	High	High	High	High	Peak Found	High	High	High	High	High	57	54.978	41.37
High	Q9Y3C8	Ubiquitin-fold modifier-conjugating enzyme 1 OS=Homo sapiens OX=9606 GN=UFC1 PE=1 SV=3	UFC1	ENSG00000143222.11	11	2	1.28474	0.0637703	1.23019e+06	1.60845e+06	1.60875e+06	1.19798e+06	1.28196e+06	913022	1.11083e+06	1.09869e+06	1.09317e+06	1.32889e+06	1.39369e+06	990363	60367.1	522980	676675	1.11083e+06	954736	672066	2	2	2	2	1	2	1	2	2	2	High	High	High	High	Peak Found	Peak Found	Peak Found	High	High	Peak Found	22	6.856	0
[truncated: 2,558 more rows]
[truncated: 18 more columns]

## Sheet: S2
Table S2. List of the significantly deregulated proteins
Accession	Description	Gene Symbol	# Unique Peptides	Abundance Ratio: (LDH) / (Wild)	P-Value: (LDH) / (Wild)
[truncated: 414 more rows]

## Sheet: S3
Table S3. Affected canonical pathways
Top canonical pathway	-log(p-value)	Molecules
[truncated: 10 more rows]

## Sheet: S4
Table S4. The proteins associated with lipid metabolism
[truncated: 36 more rows]

[truncated: 1 more sheets: S5]
